# Supplementary material for: Copper-catalyzed room-temperature cross-dehydrogenative coupling of secondary amides with terminal alkynes: a chemoselective synthesis of ynamides
Source: Royal Society of Chemistry journal article supplement (doi:10.1039/d3ob02032k), 2024-01-01
Supplement: d3ob02032k1.pdf [file d3ob02032k1.pdf]

## Supporting Information

### **New insights into copper-catalyzed cross-dehydrogenative-coupling of secondary amides and terminal alkynes: facile synthesis of ynamides**

Shuang-Yan Zhuo, Jian-Liang Ye\* and Xiao Zheng\*

#### **Table of Contents**

|                                                                                       |     |
|---------------------------------------------------------------------------------------|-----|
| 1. The Optimization of the Cross-dehydrogenative-coupling (CDC) Reaction Conditions . | 2   |
| 2. Copper-catalyzed CDC Reaction of Amides with terminal alkynes:.....                | 7   |
| 3. Computational Studies .....                                                        | 14  |
| 4. Kinetic Studies of The Copper-catalyzed CDC Reaction.....                          | 51  |
| 5. <sup>1</sup> H and <sup>13</sup> C NMR spectra.....                                | 54  |
| 6. References .....                                                                   | 184 |

## 1. The Optimization of the Cross-dehydrogenative-coupling (CDC) Reaction Conditions

The optimization of reactions were conducted with the following procedure: In a 25 mL round bottom flask, the amide **1a** (1.5 mmol, 3.0 eq), ligand (0.25 mmol, 0.5 eq), copper salt (0.1 mmol, 0.2 eq), base (1.5 mmol, 3.0 eq), 3Å molecular sieves (160mg) were dissolved in dry solvent (2 mL) and the terminal alkyne **2a** (0.5 mmol, 1.0 eq) was successively added. The mixture was degassed three times by applying vacuum, and backfilling with oxygen while stirring vigorously. The mixture was stirred at room temperature for 24 h, filtered by diatomaceous earth over a plug of silica gel (washed with EtOAc), and the solvent was removed under reduced pressure. The crude residue was purified by flash chromatography on silica gel to afford ynamide **3aa** and homo-coupling dimer of alkyne **4a**.

Our investigation commenced with the cross-dehydrogenative-coupling (CDC) of amide **1a** with phenylacetylene **2a** (Table S1~ S3). Under a common copper-catalyzed aerobic oxidative CDC conditions, a desired ynamide **3aa** and an alkyne homo-coupling dimer **4a** were obtained while 3Å molecular sieve was added. For to get optimized conditions, a series of factors such as ligands, copper salt, bases and solvents were studied in the first (Table S1). To our delight, ynamide **3aa** was obtained in a yield of 56% by using 1-methylbenzimidazole as a ligand, while successfully avoiding the formation of **4a** (Table S1, entry 10). Noteworthy, bivalent copper salts have better catalysis than monovalent copper salts (Table S1, entry 15~19 vs 20~22), a relatively satisfactory results can be obtained in the presence of Cu(OTf)<sub>2</sub> (Table S1, entry 19). By using Na<sub>2</sub>CO<sub>3</sub> as a base, the yield of ynamide **3aa** increased to 72%. Further, the utilization of toluene as a solvent resulted in an 88% yield of the desired ynamide **3aa** without observation of **4a** (Table S1, entry 10). On the basis of these, the optimization of amide **1a**, Na<sub>2</sub>CO<sub>3</sub> base, Cu(OTf)<sub>2</sub> catalyst, 1-methylbenzimidazole ligand and reaction time was carried out one by one (Table S2). Finally, considering the indispensable role of molecular sieve, the dosage of molecular sieve in the reaction was further optimized, and the optimal reaction conditions were determined (Table S3). The effect of amide loadings in the CDC reaction also was investigated (Table S4)..

**Table S1.** Optimization of ligand, copper salt, base, and solvent

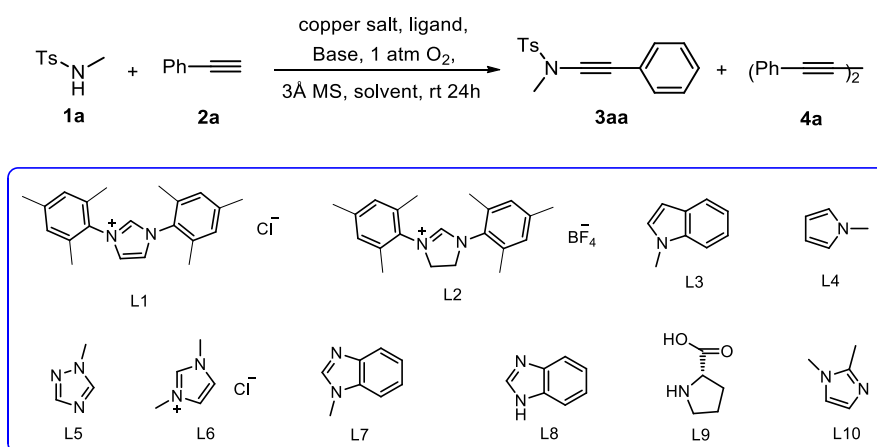

| Entry | Ligand | Copper Salt                          | Base                           | Solvent (dry) | Yield (%)        |                 |
|-------|--------|--------------------------------------|--------------------------------|---------------|------------------|-----------------|
|       |        |                                      |                                |               | 3aa <sup>a</sup> | 4a <sup>a</sup> |
| 1     | L1     | CuCl <sub>2</sub> ·2H <sub>2</sub> O | t-BuOK                         | DCM           | 4                | trace           |
| 2     | L1     | CuCl <sub>2</sub> ·2H <sub>2</sub> O | K <sub>2</sub> CO <sub>3</sub> | DCM           |                  | NR              |
| 3     | L2     | CuCl <sub>2</sub> ·2H <sub>2</sub> O | K <sub>2</sub> CO <sub>3</sub> | DCM           | nd               | 56              |

|    |     |                                      |                                  |     |       |       |
|----|-----|--------------------------------------|----------------------------------|-----|-------|-------|
| 4  | L2  | CuCl <sub>2</sub> ·2H <sub>2</sub> O | t-BuOK                           | DCM | 20    | 73    |
| 5  | L3  | CuCl <sub>2</sub> ·2H <sub>2</sub> O | K <sub>2</sub> CO <sub>3</sub>   | DCM | nd    | 44    |
| 6  | L4  | CuCl <sub>2</sub> ·2H <sub>2</sub> O | K <sub>2</sub> CO <sub>3</sub>   | DCM | nd    | 53    |
| 7  | L5  | CuCl <sub>2</sub> ·2H <sub>2</sub> O | K <sub>2</sub> CO <sub>3</sub>   | DCM | 5     | 60    |
| 8  | L6  | CuCl <sub>2</sub> ·2H <sub>2</sub> O | K <sub>2</sub> CO <sub>3</sub>   | DCM | 8     | 59    |
| 9  | L6  | CuCl <sub>2</sub> ·2H <sub>2</sub> O | t-BuOK                           | DCM | 8     | 50    |
| 10 | L7  | CuCl <sub>2</sub> ·2H <sub>2</sub> O | K <sub>2</sub> CO <sub>3</sub>   | DCM | 56    | -     |
| 11 | L8  | CuCl <sub>2</sub> ·2H <sub>2</sub> O | K <sub>2</sub> CO <sub>3</sub>   | DCM |       | NR    |
| 12 | L9  | CuCl <sub>2</sub> ·2H <sub>2</sub> O | K <sub>2</sub> CO <sub>3</sub>   | DCM | trace | trace |
| 13 | L10 | CuCl <sub>2</sub> ·2H <sub>2</sub> O | K <sub>2</sub> CO <sub>3</sub>   | DCM | 46    | 49    |
| 14 | BK  | CuCl <sub>2</sub> ·2H <sub>2</sub> O | K <sub>2</sub> CO <sub>3</sub>   | DCM | nd    | trace |
| 15 | L7  | CuSO <sub>4</sub>                    | K <sub>2</sub> CO <sub>3</sub>   | DCM | 39    | 52    |
| 16 | L7  | CuBr <sub>2</sub>                    | K <sub>2</sub> CO <sub>3</sub>   | DCM | 33    | 35    |
| 17 | L7  | (AcO) <sub>2</sub> Cu                | K <sub>2</sub> CO <sub>3</sub>   | DCM | 32    | 37    |
| 18 | L7  | Cu(NO <sub>3</sub> ) <sub>2</sub>    | K <sub>2</sub> CO <sub>3</sub>   | DCM | 65    | 34    |
| 19 | L7  | Cu(OTf) <sub>2</sub>                 | K <sub>2</sub> CO <sub>3</sub>   | DCM | 67    | 30    |
| 20 | L7  | CuCl                                 | K <sub>2</sub> CO <sub>3</sub>   | DCM | 23    | 52    |
| 21 | L7  | CuBr                                 | K <sub>2</sub> CO <sub>3</sub>   | DCM | 18    | 50    |
| 22 | L7  | CuI                                  | K <sub>2</sub> CO <sub>3</sub>   | DCM | trace | 47    |
| 23 | L7  | Cu(OTf) <sub>2</sub>                 | Na <sub>2</sub> CO <sub>3</sub>  | DCM | 72    | 24    |
| 24 | L7  | Cu(OTf) <sub>2</sub>                 | Li <sub>2</sub> CO <sub>3</sub>  | DCM | 18    | trace |
| 25 | L7  | Cu(OTf) <sub>2</sub>                 | AcOLi                            | DCM | 21    | 55    |
| 26 | L7  | Cu(OTf) <sub>2</sub>                 | Cs <sub>2</sub> CO <sub>3</sub>  | DCM | 19    | 63    |
| 27 | L7  | Cu(OTf) <sub>2</sub>                 | Na <sub>2</sub> HPO <sub>4</sub> | DCM | 51    | trace |

|    |    |                      |                                 |                    |    |       |
|----|----|----------------------|---------------------------------|--------------------|----|-------|
| 28 | L7 | Cu(OTf) <sub>2</sub> | NaOH                            | DCM                | 22 | 61    |
| 29 | L7 | Cu(OTf) <sub>2</sub> | Na <sub>2</sub> CO <sub>3</sub> | THF                | 80 | trace |
| 30 | L7 | Cu(OTf) <sub>2</sub> | Na <sub>2</sub> CO <sub>3</sub> | Toluene            | 88 | trace |
| 31 | L7 | Cu(OTf) <sub>2</sub> | Na <sub>2</sub> CO <sub>3</sub> | DMF                | 18 | 71    |
| 32 | L7 | Cu(OTf) <sub>2</sub> | Na <sub>2</sub> CO <sub>3</sub> | CH <sub>3</sub> CN | 45 | 42    |
| 33 | L7 | Cu(OTf) <sub>2</sub> | Na <sub>2</sub> CO <sub>3</sub> | MTBE               | 45 | 53    |

[a] Isolated yield.

**Table S2.** Optimization of the quantities of amide, base, copper salt, ligand and reaction time

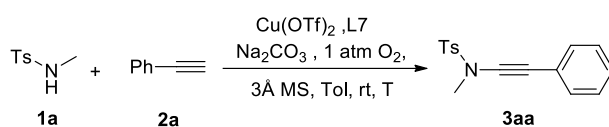

| Entry | 1a (eq) | Na <sub>2</sub> CO <sub>3</sub> (eq) | Cu(OTf) <sub>2</sub> (eq) | L7 (eq) | Time (h) | Yield (%) <sup>a</sup> |
|-------|---------|--------------------------------------|---------------------------|---------|----------|------------------------|
| 1     | 3       | 3                                    | 0.2                       | 0.5     | 24       | 88                     |
| 2     | 2.5     | 3                                    | 0.2                       | 0.5     | 24       | 79                     |
| 3     | 3       | 3                                    | 0.2                       | 0.4     | 24       | 89                     |
| 4     | 3       | 3                                    | 0.2                       | 0.2     | 24       | 75                     |
| 5     | 3       | 3                                    | 0.15                      | 0.3     | 24       | 64                     |
| 6     | 3       | 3                                    | 0.1                       | 0.2     | 24       | 61                     |
| 7     | 3       | 2                                    | 0.2                       | 0.4     | 24       | 84                     |
| 8     | 3       | 1                                    | 0.2                       | 0.4     | 24       | 26                     |
| 9     | 3       | 3                                    | 0.2                       | 0.4     | 16       | 72                     |
| 10    | 3       | 3                                    | 0.2                       | 0.4     | 18       | 83                     |
| 11    | 3       | 3                                    | 0.2                       | 0.4     | 20       | 89                     |
| 12    | 3       | 3                                    | 0.2                       | 0.4     | 22       | 89                     |

[a] Isolated yield.

**Table S3.** The effects of molecular sieves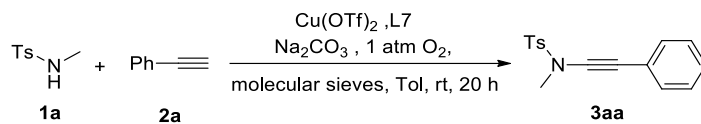

| Entry | Molecular sieves | Weight (mg) | Yield (%) <sup>a</sup> |
|-------|------------------|-------------|------------------------|
| 1     | BK               | 0           | trace                  |
| 2     | 3Å               | 60          | 33                     |
| 3     | 3Å               | 120         | 39                     |
| 4     | 3Å               | 150         | 86                     |
| 5     | 3Å               | 180         | 93                     |
| 6     | 3Å               | 210         | 81                     |
| 7     | 4Å               | 120         | 51                     |
| 8     | 4Å               | 150         | 58                     |
| 9     | 4Å               | 180         | 56                     |

[a] Isolated yield.

**Table S4.** The effect of amide loadings in the CDC reaction<sup>a</sup>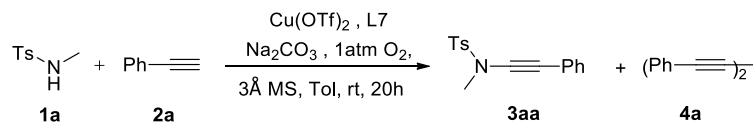

| Entry | Amide 1a (eq) | 3aa (%) <sup>b</sup> | 4a (%) <sup>b</sup> |
|-------|---------------|----------------------|---------------------|
| 1     | 0             | 0                    | 6                   |
| 2     | 0.5           | 18                   | 23                  |
| 3     | 1             | 49                   | 40                  |
| 4     | 1.5           | 58                   | 43                  |
| 5     | 2             | 69                   | 31                  |
| 6     | 2.5           | 80                   | 19                  |
| 7     | 3             | 93                   | trace               |

[a] Reaction conditions: **1a** (x eq), 1-methylbenzimidazole (0.2 mmol, 0.4 eq),  $\text{Cu}(\text{OTf})_2$  (0.1 mmol, 0.2 eq),  $\text{Na}_2\text{CO}_3$  (1.5 mmol, 3.0 eq), 3Å molecular sieves were dissolved in Tol (2 mL) and **2a** (0.5 mmol, 1.0 eq) was successively added.

The mixture was stirred at room temperature for 24 h in oxygen atmosphere. [b]  
Isolated yield.

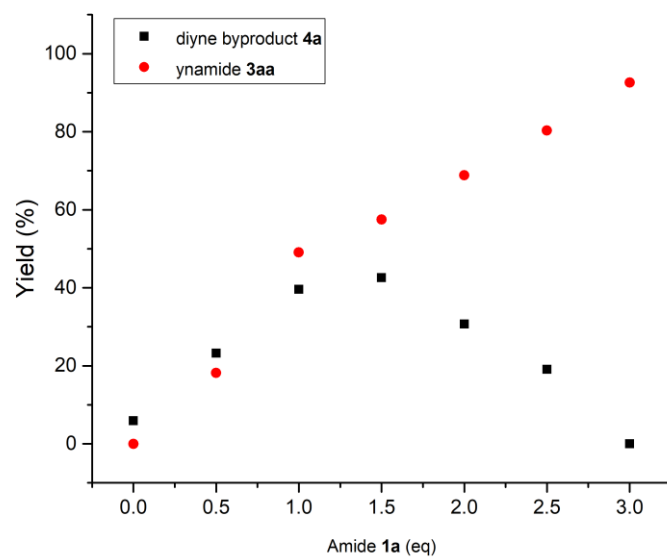

**Figure S1.** The effects of amide equivalent

## 2. Copper-catalyzed CDC Reaction of Amides with terminal alkynes:

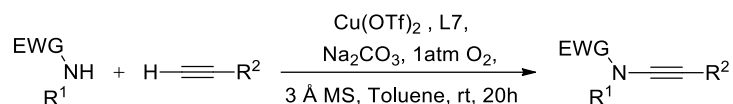

**General procedure:** In a 25 mL round bottom flask, the amide (1.5 mmol, 3.0 eq), 1-methylbenzimidazole (0.2 mmol, 0.4 eq), Cu(OTf)<sub>2</sub> (0.1 mmol, 0.2 eq), Na<sub>2</sub>CO<sub>3</sub> (1.5 mmol, 3.0 eq), 3Å molecular sieves (180mg) were dissolved in dry solvent (2 mL) and the terminal alkynes (0.5 mmol, 1.0 eq) was successively added. The mixture was degassed three times by applying vacuum, and backfilling with oxygen while stirring vigorously. The mixture was stirred at room temperature for 20 h, filtered by diatomaceous earth over a plug of silica gel (washed with EtOAc), and the solvent was removed under reduced pressure. The crude residue was purified by flash chromatography over silica gel.

### *N*-((4-methoxyphenyl)ethynyl)-*N*-methylmethanesulfonamide (**3bb**)

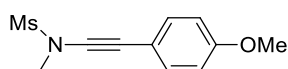

Following the **general procedure**, the reaction of **1b** and **2b** afforded **3bb** as a white solid (eluent: EtOAc/PE = 1/6; 93% yield): mp 92.3-96.0 °C; IR (film)  $\nu_{\text{max}}$ : 2232, 1595, 1366, 1273, 1261, 1191, 1167, 1091 cm<sup>-1</sup>; <sup>1</sup>H NMR (600 MHz, CDCl<sub>3</sub>)  $\delta$  7.39–7.34 (m, 2H), 6.86–6.81 (m, 3H), 3.81 (d, *J* = 3.96 Hz, 3H), 3.28 (d, *J* = 4.02 Hz, 3H), 3.12 (d, *J* = 3.96 Hz, 3H). <sup>13</sup>C NMR (150 MHz, CDCl<sub>3</sub>)  $\delta$  159.6, 133.5, 114.2, 113.9, 81.6, 69.1, 55.3, 39.2 36.6; HRMS (ESI) calcd for [C<sub>11</sub>H<sub>13</sub>NO<sub>3</sub>SNa]<sup>+</sup> (M + Na<sup>+</sup>): 262.0508, Found: 262.0497. All spectral data are in accordance with the literature.<sup>12</sup>

### *N*-methyl-*N*-((4-(trifluoromethyl)phenyl)ethynyl)methanesulfonamide (**3bc**)

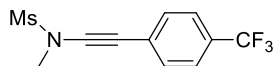

Following the **general procedure**, the reaction of **1b** and **2c** afforded **3bc** as a colorless oil (eluent: EtOAc/PE = 1/6; 91% yield): mp 82.1-84.3 °C; IR (film)  $\nu_{\text{max}}$ : 2236, 1595, 1365, 1275, 1259, 1189, 1167, 1087 cm<sup>-1</sup>; <sup>1</sup>H NMR (600 MHz, CDCl<sub>3</sub>)  $\delta$  7.54 (d, *J* = 8.34 Hz, 2H), 7.48 (d, *J* = 8.34 Hz, 2H), 3.32 (s, 3H), 3.14 (s, 3H). <sup>13</sup>C NMR (150 MHz, CDCl<sub>3</sub>)  $\delta$  131.0, 129.2 (q, *J* = 32.6 Hz), 126.4, 125.1 (q, *J* = 3.7 Hz), 123.8 (q, *J* = 272.1 Hz), 85.4, 68.6, 39.0, 37.0; HRMS (ESI) calcd for [C<sub>12</sub>H<sub>15</sub>F<sub>3</sub>NO<sub>3</sub>S]<sup>+</sup> (M + MeOH + H<sup>+</sup>): 310.0719, Found: 310.0721. All spectral data are in accordance with the literature.<sup>15</sup>

### *N*-(cyclopropylethynyl)-*N*-methylmethanesulfonamide (**3bm**)

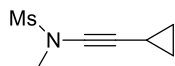

Following the **general procedure**, the reaction of **1b** and **2m** afforded **3bm** as a white solid (eluent: EtOAc/PE = 1/5; 86% yield): mp 43.2-45.8 °C; IR (film)  $\nu_{\text{max}}$ : 2926, 2216, 1748, 1697, 1451, 1367, 1283, 1259, 1228 cm<sup>-1</sup>; <sup>1</sup>H NMR (600 MHz, CDCl<sub>3</sub>)  $\delta$  3.08 (s, 3H), 2.96 (s, 3H), 1.25 (m, 1H), 0.74 (m, 2H), 0.62 (m, 2H). <sup>13</sup>C NMR (150 MHz, CDCl<sub>3</sub>)  $\delta$  73.3, 69.7, 39.1, 35.9, 8.6, -1.1; HRMS (ESI) calcd for [C<sub>7</sub>H<sub>11</sub>NO<sub>2</sub>SNa]<sup>+</sup> (M + Na<sup>+</sup>): 196.0403, Found: 196.0402. All spectral data are in accordance with the literature.<sup>8</sup>

### *N*-methyl-*N*-((trimethylsilyl)ethynyl)methanesulfonamide (**3bn**)

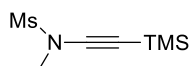

Following the **general procedure**, the reaction of **1b** and **2n** afforded **3bn** as a white solid (eluent: EtOAc/PE = 1/5; 99% yield): mp 41.2-44.3 °C; IR (film)  $\nu_{\text{max}}$ : 2926, 2216, 1757, 1695, 1455, 1355, 1277, 1259, 1230  $\text{cm}^{-1}$ ;  $^1\text{H}$  NMR (600 MHz,  $\text{CDCl}_3$ )  $\delta$  3.20 (d,  $J = 2.10$  Hz, 3H), 3.07 (d,  $J = 2.10$  Hz, 3H), 0.18 (d,  $J = 2.13$  Hz, 9H).  $^{13}\text{C}$  NMR (150 MHz,  $\text{CDCl}_3$ )  $\delta$  95.6, 71.8, 38.9, 36.6, 0.1; HRMS (ESI) calcd for  $[\text{C}_7\text{H}_{15}\text{NO}_2\text{SSiNa}]^+$  ( $\text{M} + \text{Na}^+$ ): 228.0485, Found: 228.0483. All spectral data are in accordance with the literature.<sup>16</sup>

#### ***N*-(hept-1-yn-1-yl)-*N*-methylmethanesulfonamide (3br)**

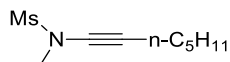

Following the **general procedure**, the reaction of **1b** and **2r** afforded **3br** as a colorless oil (eluent: EtOAc/PE = 1/6; 32% yield): IR (film)  $\nu_{\text{max}}$ : 2928, 2214, 1753, 1691, 1357, 1281, 1261, 1232  $\text{cm}^{-1}$ ;  $^1\text{H}$  NMR (600 MHz,  $\text{CDCl}_3$ )  $\delta$  3.16 (s, 3H), 3.03 (d, 3H), 2.27 (t,  $J = 7.20$  Hz, 2H), 1.51 (m, 2H), 1.39–1.28 (m, 4H), 0.90 (t,  $J = 6.96$  Hz, 3H).  $^{13}\text{C}$  NMR (150 MHz,  $\text{CDCl}_3$ )  $\delta$  74.1, 69.2, 39.1, 35.8, 30.9, 28.5, 22.1, 18.2, 13.9; HRMS (ESI) calcd for  $[\text{C}_9\text{H}_{18}\text{NO}_2\text{S}]^+$  ( $\text{M} + \text{H}^+$ ): 204.1053, Found: 204.1059. All spectral data are in accordance with the literature.<sup>17</sup>

#### ***N*-benzyl-*N*-(cyclopropylethynyl)-4-methylbenzenesulfonamide (3em)**

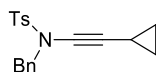

Following the **general procedure**, the reaction of **1e** and **2m** afforded **3em** as a white solid (eluent: EtOAc/PE = 1/7; 50% yield): mp 76.5-79.1 °C; IR (film)  $\nu_{\text{max}}$ : 2924, 2210, 1757, 1695, 1451, 1355, 1275, 1261, 1232  $\text{cm}^{-1}$ ;  $^1\text{H}$  NMR (600 MHz,  $\text{CDCl}_3$ )  $\delta$  7.72 (d,  $J = 8.28$  Hz, 2H), 7.30–7.24 (m, 7H), 4.42 (s, 2H), 2.43 (s, 3H), 1.20 (m, 1H), 0.69 (m, 2H), 0.49 (m, 2H).  $^{13}\text{C}$  NMR (150 MHz,  $\text{CDCl}_3$ )  $\delta$  144.3, 134.7, 134.6, 129.5, 128.7, 128.3, 128.0, 127.6, 75.3, 68.8, 55.5, 21.6, 8.6, -0.9; HRMS (ESI) calcd for  $[\text{C}_{19}\text{H}_{19}\text{NO}_2\text{SNa}]^+$  ( $\text{M} + \text{Na}^+$ ): 348.1029, Found: 348.1025. All spectral data are in accordance with the literature.<sup>18</sup>

#### ***N*-(cyclopropylethynyl)-4-methyl-*N*-phenylbenzenesulfonamide (3fm)**

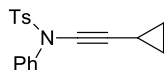

Following the **general procedure**, the reaction of **1f** and **2m** afforded **3fm** as a white solid (eluent: EtOAc/PE = 1/7; 66% yield): mp 81.2-84.3 °C; IR (film)  $\nu_{\text{max}}$ : 2920, 2216, 1751, 1693, 1451, 1363, 1275, 1259, 1232  $\text{cm}^{-1}$ ;  $^1\text{H}$  NMR (600 MHz,  $\text{CDCl}_3$ )  $\delta$  7.54 (d,  $J = 8.22$  Hz, 2H), 7.31–7.24 (m, 5H), 7.21 (d,  $J = 6.78$  Hz, 2H), 2.42 (s, 3H), 1.32 (m, 1H), 0.78 (m, 2H), 0.65 (m, 2H).  $^{13}\text{C}$  NMR (150 MHz,  $\text{CDCl}_3$ )  $\delta$  144.6, 139.2, 132.8, 129.2, 128.8, 128.1, 127.8, 126.0, 74.5, 69.2, 21.6, 8.7, -0.8; HRMS (ESI) calcd for  $[\text{C}_{18}\text{H}_{17}\text{NO}_2\text{SNa}]^+$  ( $\text{M} + \text{Na}^+$ ): 334.0872, Found: 334.0879. All spectral data are in accordance with the literature.<sup>19</sup>

#### **1-(cyclopropylethynyl)pyrrolidin-2-one (3hm)**

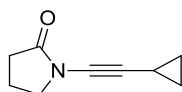

Following the **general procedure**, the reaction of **1h** and **2m** afforded **3hm** as a colorless oil (eluent: EtOAc/PE = 1/4; 31% yield): IR (film)  $\nu_{\text{max}}$ : 2922, 2214, 1753, 1700, 1357, 1279, 1261, 1228  $\text{cm}^{-1}$ ;  $^1\text{H}$  NMR (600 MHz,  $\text{CDCl}_3$ )  $\delta$  3.57 (t,  $J = 7.14$  Hz,



2H), 2.34 (t,  $J = 7.92$  Hz, 2H), 2.03(m,  $J = 7.92, 7.14$  Hz, 2H), 1.30 (m, 1H), 0.74 (m, 2H), 0.64 (m, 2H).  $^{13}\text{C}$  NMR (150 MHz,  $\text{CDCl}_3$ )  $\delta$  176.2, 76.0, 66.6, 49.9, 29.4, 18.5, 8.5, -0.9; HRMS (ESI) calcd for  $[\text{C}_9\text{H}_{11}\text{NONa}]^+$  ( $\text{M} + \text{Na}^+$ ): 172.0733, Found: 172.0731.

#### 1-((4-methoxyphenyl)ethynyl)-4,4-dimethylpyrrolidin-2-one (3ib)

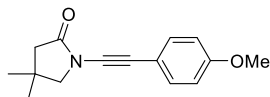

Following the **general procedure**, the reaction of **1i** and **2b** afforded **3ib** as a colorless oil (eluent: EtOAc/PE = 1/5; 47% yield): IR (film)  $\nu_{\text{max}}$ : 3008, 2986, 2362, 2249, 1717, 1276, 1261  $\text{cm}^{-1}$ ;  $^1\text{H}$  NMR (600 MHz,  $\text{CDCl}_3$ )  $\delta$  7.31 (d,  $J = 8.38$  Hz, 2H), 6.36 (d,  $J = 8.38$  Hz, 2H), 3.73 (s, 3H), 3.40 (s, 2H), 2.23 (s, 2H), 1.15 (s, 6H);  $^{13}\text{C}$  NMR (150 MHz,  $\text{CDCl}_3$ )  $\delta$  175.2, 159.4, 133.2, 114.5, 113.8, 79.1, 71.8, 63.0, 55.2, 44.9, 33.8, 27.4; HRMS (ESI) calcd for  $[\text{C}_{15}\text{H}_{17}\text{NO}_2\text{Na}]^+$  ( $\text{M} + \text{Na}^+$ ): 266.1151, Found: 266.1142.

#### 4,4-dimethyl-1-((4-(trifluoromethyl)phenyl)ethynyl)pyrrolidin-2-one (3ic)

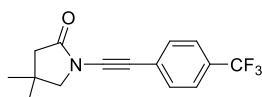

Following the **general procedure**, the reaction of **1i** and **2c** afforded **3ic** as a colorless oil (eluent: EtOAc/PE = 1/5; 51% yield): IR (film)  $\nu_{\text{max}}$ : 2962, 2249, 1730, 1406, 1323, 1276, 1168, 1126, 1068  $\text{cm}^{-1}$ ;  $^1\text{H}$  NMR (600 MHz,  $\text{CDCl}_3$ )  $\delta$  7.46 (q, 4H), 3.44(s, 2H), 2.25 (s, 2H), 1.16 (s, 6H);  $^{13}\text{C}$  NMR (150 MHz,  $\text{CDCl}_3$ )  $\delta$  175.2, 131.3, 129.3 (q,  $J = 32.5$  Hz), 126.6, 125.1 (q,  $J = 4.3$  Hz), 123.9 (q,  $J = 272.0$  Hz), 83.0, 71.3, 62.7, 44.8, 34.0, 27.3; HRMS (ESI) calcd for  $[\text{C}_{15}\text{H}_{14}\text{NOF}_3\text{Na}]^+$  ( $\text{M} + \text{Na}^+$ ): 304.0920, Found: 304.0911.

#### methyl 4-((4,4-dimethyl-2-oxopyrrolidin-1-yl)ethynyl)benzoate (3ig)

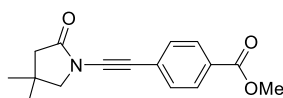

Following the **general procedure**, the reaction of **1i** and **2g** afforded **3ig** as a white solid (eluent: EtOAc/PE = 1/5; 66% yield): mp 117.8-119.3  $^{\circ}\text{C}$ ; IR (film)  $\nu_{\text{max}}$ : 3004, 2960, 2363, 2245, 11719, 1403, 1276, 1170  $\text{cm}^{-1}$ ;  $^1\text{H}$  NMR (600 MHz,  $\text{CDCl}_3$ )  $\delta$  7.96 (d,  $J = 8.56$  Hz, 2H), 7.48 (d,  $J = 8.56$  Hz, 2H), 3.91 (s, 3H), 3.51 (s, 2H), 2.32 (s, 2H), 1.23 (s, 6H);  $^{13}\text{C}$  NMR (150 MHz,  $\text{CDCl}_3$ )  $\delta$  175.2, 166.5, 130.9, 129.4, 128.9, 127.6, 83.6, 71.9, 62.7, 52.1, 44.8, 33.9, 27.3; HRMS (ESI) calcd for  $[\text{C}_{16}\text{H}_{17}\text{NO}_3\text{Na}]^+$  ( $\text{M} + \text{Na}^+$ ): 294.1101, Found: 294.1089.

#### 1-(cyclopropylethynyl)-4,4-dimethylpyrrolidin-2-one (3im)

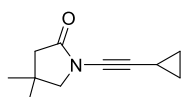

Following the **general procedure**, the reaction of **1i** and **2m** afforded **3im** as a colorless oil (eluent: EtOAc/PE = 1/4; 27% yield): IR (film)  $\nu_{\text{max}}$ : 3006, 2960, 2873, 2358, 2260, 1717, 1412, 1312, 1276, 1261  $\text{cm}^{-1}$ ;  $^1\text{H}$  NMR (600 MHz,  $\text{CDCl}_3$ )  $\delta$  3.26 (s, 2H), 2.15(s, 2H), 1.32-1.26 (m, 1H), 1.10(s, 6H), 0.74-0.71 (m, 2H), 0.66-0.63 (m, 2H);  $^{13}\text{C}$  NMR (150 MHz,  $\text{CDCl}_3$ )  $\delta$  175.7, 75.7, 68.0, 63.0, 44.7, 33.5, 27.4, 8.6, -0.8; HRMS (ESI) calcd for  $[\text{C}_{11}\text{H}_{15}\text{NONa}]^+$  ( $\text{M} + \text{Na}^+$ ): 200.1046, Found: 200.1040.

### 3-((4-methoxyphenyl)ethynyl)oxazolidin-2-one (3Ib)

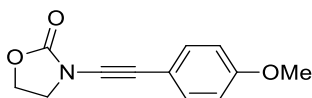

Following the **general procedure**, the reaction of **1I** and **2b** afforded **3Ib** as a white solid (eluent: EtOAc/PE = 1/6; 96% yield): mp 99.5-102.6 °C; IR (film)  $\nu_{\text{max}}$ : 2242, 1608, 1366, 1277, 1257, 1189, 1167, 1089  $\text{cm}^{-1}$ ;  $^1\text{H}$  NMR (600 MHz,  $\text{CDCl}_3$ )  $\delta$  7.38 (d,  $J$  = 8.76 Hz, 2H), 6.83 (d,  $J$  = 8.76 Hz, 2H), 4.45 (t,  $J$  = 7.74 Hz, 2H), 3.96 (t,  $J$  = 7.74 Hz, 2H), 3.79 (s, 3H).  $^{13}\text{C}$  NMR (150 MHz,  $\text{CDCl}_3$ )  $\delta$  159.6, 156.0, 133.3, 113.8, 77.5, 70.7, 63.0, 55.2, 47.0; HRMS (ESI) calcd for  $[\text{C}_{12}\text{H}_{11}\text{NO}_3\text{Na}]^+$  ( $M + \text{Na}^+$ ): 240.0631, Found: 240.0619. All spectral data are in accordance with the literature.<sup>1</sup>

### 3-((4-(trifluoromethyl)phenyl)ethynyl)oxazolidin-2-one (3Ic)

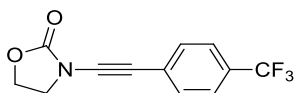

Following the **general procedure**, the reaction of **1I** and **1c** afforded **3Ic** as a white solid (eluent: EtOAc/PE = 1/6; 68% yield): mp 100.9-103.0 °C; IR (film)  $\nu_{\text{max}}$ : 2236, 1597, 1367, 1273, 1263, 1189, 1165, 1091  $\text{cm}^{-1}$ ;  $^1\text{H}$  NMR (600 MHz,  $\text{CDCl}_3$ )  $\delta$  7.56 (d,  $J$  = 8.28 Hz, 2H), 7.52 (d,  $J$  = 8.28 Hz, 2H), 4.52 (t,  $J$  = 7.41 Hz, 2H), 4.04 (t,  $J$  = 7.41 Hz, 2H).  $^{13}\text{C}$  NMR (150 MHz,  $\text{CDCl}_3$ )  $\delta$  155.6, 131.3, 129.6 (q,  $J$  = 33.0 Hz), 126.1, 125.2 (q,  $J$  = 4.2 Hz), 123.9 (q,  $J$  = 272.0 Hz), 81.3, 70.4, 63.1, 46.8; HRMS (ESI) calcd for  $[\text{C}_{12}\text{H}_8\text{F}_3\text{NO}_2\text{Na}]^+$  ( $M + \text{Na}^+$ ): 278.0399, Found: 278.0400. All spectral data are in accordance with the literature.<sup>20</sup>

### 3-(cyclopropylethynyl)oxazolidin-2-one (3Im)

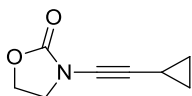

Following the **general procedure**, the reaction of **1I** and **2m** afforded **3Im** as a white solid (eluent: EtOAc/PE = 1/4; 91% yield): mp 50.6-52.5 °C; IR (film)  $\nu_{\text{max}}$ : 2924, 2212, 1757, 1695, 1453, 1369, 1283, 1257, 1226  $\text{cm}^{-1}$ ;  $^1\text{H}$  NMR (600 MHz,  $\text{CDCl}_3$ )  $\delta$  4.42 (t,  $J$  = 8.22 Hz, 2H), 3.87 (t,  $J$  = 8.22 Hz, 2H), 1.35 (m, 1H), 0.82 (m, 2H), 0.71 (m, 2H).  $^{13}\text{C}$  NMR (150 MHz,  $\text{CDCl}_3$ )  $\delta$  156.7, 74.8, 65.4, 62.8, 46.9, 8.5, -1.1; HRMS (ESI) calcd for  $[\text{C}_8\text{H}_9\text{NO}_2\text{Na}]^+$  ( $M + \text{Na}^+$ ): 174.0526, Found: 174.0525. All spectral data are in accordance with the literature.<sup>14</sup>

### 3-((trimethylsilyl)ethynyl)oxazolidin-2-one (3In)

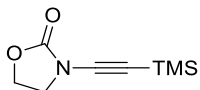

Following the **general procedure**, the reaction of **1I** and **2n** afforded **3In** as a white solid (eluent: EtOAc/PE = 1/4; 84% yield): mp 78.0-81.3 °C; IR (film)  $\nu_{\text{max}}$ : 2926, 2222, 1755, 1697, 1453, 1359, 1279, 1261, 1232  $\text{cm}^{-1}$ ;  $^1\text{H}$  NMR (600 MHz,  $\text{CDCl}_3$ )  $\delta$  4.42 (t,  $J$  = 7.99 Hz, 2H), 3.93 (t,  $J$  = 7.99 Hz, 2H), 0.20 (s, 9H).  $^{13}\text{C}$  NMR (150 MHz,  $\text{CDCl}_3$ )  $\delta$  155.8, 91.3, 73.7, 62.9, 46.8, 0.0; HRMS (ESI) calcd for  $[\text{C}_8\text{H}_{14}\text{NO}_2]^+$  ( $M + \text{H}^+$ ): 184.0788, Found: 184.0791. All spectral data are in accordance with the literature.<sup>16</sup>

### 3-(3-methylbut-3-en-1-yn-1-yl)oxazolidin-2-one (3Ip)

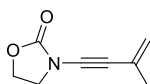

Following the **general procedure**, the reaction of **1l** and **2p** afforded **3lp** as a white solid (eluent: EtOAc/PE = 1/6; 79% yield): decompose at 95 °C; IR (film)  $\nu_{\text{max}}$ : 3004, 2988, 2360, 2242, 1757, 1276, 1261  $\text{cm}^{-1}$ ;  $^1\text{H}$  NMR (600 MHz,  $\text{CDCl}_3$ )  $\delta$  5.25 (d,  $J$  = 42.93 Hz, 2H), 4.45 (t,  $J$  = 8.44 Hz, 2H), 3.94 (t,  $J$  = 8.44 Hz, 2H), 1.92 (s, 3H);  $^{13}\text{C}$  NMR (150 MHz,  $\text{CDCl}_3$ )  $\delta$  155.8, 125.7, 121.2, 78.1, 72.5, 62.9, 47.0, 23.5; HRMS (ESI) calcd for  $[\text{C}_8\text{H}_9\text{NO}_2\text{Na}]^+$  ( $M + \text{Na}^+$ ): 174.0531, Found: 174.0522. All spectral data are in accordance with the literature.<sup>21</sup>

### 3-(cyclohex-1-en-1-ylethynyl)oxazolidin-2-one (3lq)

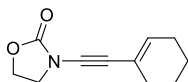

Following the **general procedure**, the reaction of **1l** and **2q** afforded **3lq** as a white solid (eluent: EtOAc/PE = 1/6; 42% yield): mp 71.6-74.5 °C; IR (film)  $\nu_{\text{max}}$ : 3003, 2918, 2358, 2243, 1761, 1420, 1276, 1261  $\text{cm}^{-1}$ ;  $^1\text{H}$  NMR (600 MHz,  $\text{CDCl}_3$ )  $\delta$  6.13 (m, 1H), 4.43 (t,  $J$  = 8.08 Hz, 2H), 3.91 (t,  $J$  = 8.08 Hz, 2H), 2.15-2.08 (m, 4H), 1.66-1.56 (m, 4H);  $^{13}\text{C}$  NMR (150 MHz,  $\text{CDCl}_3$ )  $\delta$  156.0, 135.4, 119.4, 76.4, 72.7, 62.8, 47.1, 29.4, 25.7, 22.3, 21.4; HRMS (ESI) calcd for  $[\text{C}_{11}\text{H}_{13}\text{NO}_2\text{Na}]^+$  ( $M + \text{Na}^+$ ): 214.0838, Found: 214.0832. All spectral data are in accordance with the literature.<sup>22</sup>

### 3-(hept-1-yn-1-yl)oxazolidin-2-one (3lr)

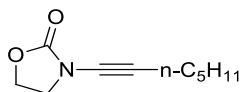

Following the **general procedure**, the reaction of **1l** and **2r** afforded **3lr** as a white solid (eluent: EtOAc/PE = 1/4; 51% yield): mp 53.4-56.2 °C; IR (film)  $\nu_{\text{max}}$ : 2928, 2212, 1751, 1695, 1448, 1363, 1277, 1265, 1230  $\text{cm}^{-1}$ ;  $^1\text{H}$  NMR (600 MHz,  $\text{CDCl}_3$ )  $\delta$  4.35 (t,  $J$  = 7.98 Hz, 2H), 3.81 (t,  $J$  = 7.98 Hz, 2H), 2.23 (t,  $J$  = 7.20 Hz, 2H), 1.46 (m, 2H), 1.33-1.21 (m, 4H), 0.83 (t,  $J$  = 7.14 Hz, 3H).  $^{13}\text{C}$  NMR (150 MHz,  $\text{CDCl}_3$ )  $\delta$  156.6, 71.1, 69.9, 62.8, 46.9, 30.8, 28.4, 22.1, 18.2, 13.8; HRMS (ESI) calcd for  $[\text{C}_{10}\text{H}_{16}\text{NO}_2]^+$  ( $M + \text{H}^+$ ): 182.1176, Found: 182.1182. All spectral data are in accordance with the literature.<sup>23</sup>

### (S)-4-benzyl-3-((4-methoxyphenyl)ethynyl)oxazolidin-2-one (3mb)

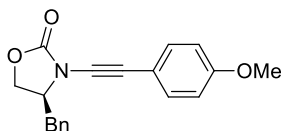

Following the **general procedure**, the reaction of **1m** and **2b** afforded **3mb** as a white solid (eluent: EtOAc/PE = 1/7; 94% yield): mp 92.9-95.3 °C;  $[\alpha]_{\text{D}}^{25}$  +168.1 ( $c$  1.0, MeOH); IR (film)  $\nu_{\text{max}}$ : 2234, 1595, 1366, 1279, 1269, 1187, 1167, 1087  $\text{cm}^{-1}$ ;  $^1\text{H}$  NMR (600 MHz,  $\text{CDCl}_3$ )  $\delta$  7.40 (d,  $J$  = 8.70 Hz, 2H), 7.31 (t,  $J$  = 7.32, 7.37 Hz, 2H), 7.26 (t,  $J$  = 7.32 Hz, 1H), 7.21 (d,  $J$  = 7.37 Hz, 2H), 6.83 (d,  $J$  = 8.70 Hz, 2H), 4.33-4.27 (m, 2H), 4.13-4.07 (m, 1H), 3.77 (s, 3H), 3.21 (dd,  $J$  = 14.01, 3.26 Hz, 1H), 2.97 (dd,  $J$  = 14.80, 7.32 Hz, 1H).  $^{13}\text{C}$  NMR (150 MHz,  $\text{CDCl}_3$ )  $\delta$  159.5, 155.5, 134.1, 133.3, 129.2, 128.7, 127.2, 113.8, 113.7, 76.5, 72.7, 67.2, 58.2, 55.1, 37.6; HRMS (ESI) calcd for  $[\text{C}_{19}\text{H}_{18}\text{NO}_3]^+$  ( $M + \text{H}^+$ ): 308.1281, Found: 308.1281. All spectral data are in accordance with the literature.<sup>1</sup>

### (S)-4-benzyl-3-((4-(trifluoromethyl)phenyl)ethynyl)oxazolidin-2-one (3mc)

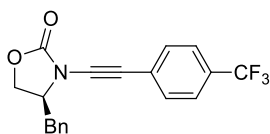

Following the **general procedure**, the reaction of **1m** and **2c** afforded **3mc** as a white solid (eluent: EtOAc/PE = 1/7; 48% yield): mp 118.0-121.4 °C;  $[\alpha]_D^{28} +127.4$  (c 1.0, MeOH); IR (film)  $\nu_{\max}$ : 2232, 1593, 1363, 1277, 1267, 1185, 1161, 1093  $\text{cm}^{-1}$ ;  $^1\text{H}$  NMR (600 MHz,  $\text{CDCl}_3$ )  $\delta$  7.55 (d,  $J = 8.25$  Hz, 2H), 7.49 (d,  $J = 8.25$  Hz, 2H), 7.35 (t,  $J = 7.32, 7.26$  Hz, 2H), 7.29 (t,  $J = 7.32$  Hz, 1H), 7.25 (d,  $J = 7.26$  Hz, 2H), 4.43–4.36 (m, 2H), 4.20–4.15 (m, 1H), 3.77 (s, 3H), 3.21 (dd,  $J = 13.99, 3.18$  Hz, 1H), 3.03 (dd,  $J = 14.55, 6.84$  Hz, 1H).  $^{13}\text{C}$  NMR (150 MHz,  $\text{CDCl}_3$ )  $\delta$  155.2, 134.0, 131.3, 129.5 (q,  $J = 32.2$  Hz), 129.3, 129.0, 127.5, 126.1, 125.1 (q,  $J = 3.8$  Hz), 123.8 (q,  $J = 272.3$  Hz), 80.4, 72.4, 67.6, 58.3, 38.1; HRMS (ESI) calcd for  $[\text{C}_{19}\text{H}_{15}\text{F}_3\text{NO}_2]^+$  (M +  $\text{H}^+$ ): 346.1049, Found: 346.1051.

#### (S)-4-benzyl-3-(cyclopropylethynyl)oxazolidin-2-one (3mm)

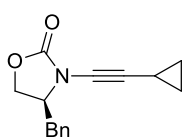

Following the **general procedure**, the reaction of **1m** and **2m** afforded **3mm** as a white solid (eluent: EtOAc/PE = 1/6; 54% yield): mp 51.5-57.6 °C;  $[\alpha]_D^{28} +143.4$  (c 1.0, MeOH); IR (film)  $\nu_{\max}$ : 2924, 2216, 1753, 1693, 1453, 1355, 1281, 1263, 1232  $\text{cm}^{-1}$ ;  $^1\text{H}$  NMR (600 MHz,  $\text{CDCl}_3$ )  $\delta$  7.22 (t,  $J = 7.38, 7.26$  Hz, 2H), 7.16 (t,  $J = 7.38$  Hz, 1H), 7.20 (d,  $J = 7.26$  Hz, 2H), 4.27 (t,  $J = 8.52$  Hz, 1H), 4.21-4.16 (m, 1H), 4.06 (q,  $J = 9.32, 2.94$  Hz, 1H), 3.17 (dd,  $J = 13.88, 4.02$  Hz, 1H), 2.90 (dd,  $J = 14.68, 8.22$  Hz, 1H), 1.39 (m, 1H), 0.84 (m, 2H), 0.73 (m, 2H).  $^{13}\text{C}$  NMR (150 MHz,  $\text{CDCl}_3$ )  $\delta$  156.2, 134.3, 129.3, 128.8, 127.3, 77.2, 67.1, 64.3, 58.2, 37.7, 8.8, 8.8, -0.9; HRMS (ESI) calcd for  $[\text{C}_{15}\text{H}_{16}\text{NO}_2]^+$  (M +  $\text{H}^+$ ): 242.1176, Found: 242.1171. All spectral data are in accordance with the literature.<sup>24</sup>

#### (S)-4-benzyl-3-((trimethylsilyl)ethynyl)oxazolidin-2-one (3mn)

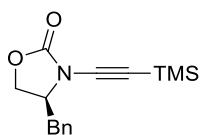

Following the **general procedure**, the reaction of **1m** and **2n** afforded **3mn** as a white solid (eluent: EtOAc/PE = 1/6; 70% yield): mp 99.9-102.3 °C;  $[\alpha]_D^{28} +151.5$  (c 1.0, MeOH); IR (film)  $\nu_{\max}$ : 2930, 2214, 1757, 1691, 1457, 1363, 1285, 1255, 1230  $\text{cm}^{-1}$ ;  $^1\text{H}$  NMR (600 MHz,  $\text{CDCl}_3$ )  $\delta$  7.22 (t,  $J = 7.38, 7.20$  Hz, 2H), 7.16 (t,  $J = 7.38$  Hz, 1H), 7.09 (d,  $J = 7.20$  Hz, 2H), 4.20–4.12 (m, 2H), 3.97 (q,  $J = 7.73, 2.88$  Hz, 1H), 3.07 (dd,  $J = 13.86, 3.78$  Hz, 1H), 2.82 (dd,  $J = 14.04, 7.86$  Hz, 1H), 0.10 (s, 9H).  $^{13}\text{C}$  NMR (150 MHz,  $\text{CDCl}_3$ )  $\delta$  155.3, 134.1, 129.3, 128.9, 127.4, 90.3, 76.0, 67.3, 58.1, 37.6, 0.0; HRMS (ESI) calcd for  $[\text{C}_{15}\text{H}_{20}\text{NO}_2]^+$  (M +  $\text{H}^+$ ): 274.1258, Found: 274.1254. All spectral data are in accordance with the literature.<sup>25</sup>

#### methyl (R)-2-oxo-3-((4-(trifluoromethyl)phenyl)ethynyl)oxazolidine-4-carboxylate (3nc)

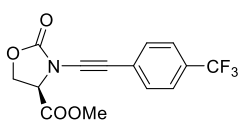

Following the **general procedure**, the reaction of **1n** and **2c** afforded **3nc** as a white solid (eluent: EtOAc/PE = 1/5; 32% yield): mp 78.0-81.4 °C;  $[\alpha]_D^{27} +118.1$  (c 1.0, MeOH); IR (film)  $\nu_{\max}$ : 3010, 2988, 2360, 2260, 1789, 1325, 1276, 1261  $\text{cm}^{-1}$ ;  $^1\text{H}$  NMR (600

MHz, CDCl<sub>3</sub>) δ 7.55 (q, 4H), 4.73-4.66 (m, 2H), 4.54 (dd, *J* = 8.58, 3.77 Hz, 1H), 3.91 (s, 3H); <sup>13</sup>C NMR (150 MHz, CDCl<sub>3</sub>) δ 168.1, 154.4, 131.6, 129.9 (q, *J* = 32.3 Hz), 125.8, 125.4 (q, *J* = 3.8 Hz), 123.8 (q, *J* = 272.0 Hz), 79.8, 71.2, 65.5, 58.6, 53.5; HRMS (ESI) calcd for [C<sub>14</sub>H<sub>10</sub>NO<sub>4</sub>F<sub>3</sub>Na]<sup>+</sup> (M + Na<sup>+</sup>): 336.0454, Found: 336.0441.

#### methyl *N*-((4-methoxyphenyl)ethynyl)-*N*-tosylglycinate (**3sb**)

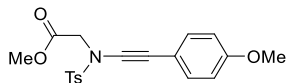

Following the **general procedure**, the reaction of **1s** and **2b** afforded **3sb** as a pale yellow oil (eluent: EtOAc/PE = 1/7; 46% yield): IR (film)  $\nu_{\text{max}}$ : 3005, 2987, 2361, 2237, 1508, 1276, 1261, 1170 cm<sup>-1</sup>; <sup>1</sup>H NMR (600 MHz, CDCl<sub>3</sub>) δ 7.78 (d, *J* = 8.22 Hz, 2H), 7.28 (d, *J* = 8.22 Hz, 2H), 7.22 (d, *J* = 9.05 Hz, 2H), 7.74 (d, *J* = 9.05 Hz, 2H), , 4.23 (s, 2H), 3.73 (s, 3H), 3.63 (s, 3H), 2.39 (s, 3H); <sup>13</sup>C NMR (150 MHz, CDCl<sub>3</sub>) δ 167.7, 159.7, 144.8, 134.4, 133.7, 129.5, 128.1, 114.2, 113.8, 80.6, 70.0, 55.3, 52.5, 52.4, 21.7; HRMS (ESI) calcd for [C<sub>19</sub>H<sub>19</sub>NO<sub>5</sub>SNa]<sup>+</sup> (M + Na<sup>+</sup>): 396.0876, Found: 396.0865.

#### methyl *N*-tosyl-*N*-((4-(trifluoromethyl)phenyl)ethynyl)glycinate (**3sc**)

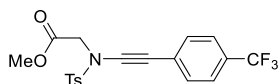

Following the **general procedure**, the reaction of **1s** and **2c** afforded **3sc** as a colorless oil (eluent: EtOAc/PE = 1/7; 80% yield): IR (film)  $\nu_{\text{max}}$ : 2949, 2239, 1761, 1615, 1372, 1327, 1276, 1217, 1168, 1124, 1067 cm<sup>-1</sup>; <sup>1</sup>H NMR (600 MHz, CDCl<sub>3</sub>) δ 7.77 (d, *J* = 8.50 Hz, 2H), 7.42 (d, *J* = 8.50 Hz, 2H), 7.31 (d, *J* = 7.94 Hz, 2H), 7.28 (d, *J* = 7.94 Hz, 2H), 4.25 (s, 2H), 3.61 (s, 3H), 2.35 (s, 3H); <sup>13</sup>C NMR (150 MHz, CDCl<sub>3</sub>) δ 167.3, 145.2, 134.1, 131.1, 129.7, 129.2 (q, *J* = 32.2 Hz), 128.0, 126.4, 125.0 (q, *J* = 3.4 Hz), 123.8 (q, *J* = 274.0 Hz), 84.5, 69.7, 52.5, 52.0, 21.6; HRMS (ESI) calcd for [C<sub>19</sub>H<sub>16</sub>NO<sub>4</sub>SF<sub>3</sub>Na]<sup>+</sup> (M + Na<sup>+</sup>): 434.0644, Found: 434.0632.

#### methyl 4-(((*N*-2-methoxy-2-oxoethyl)-4-methylphenyl)sulfonamido)ethynyl)benzoate (**3sg**)

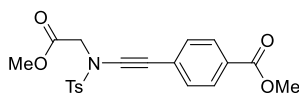

Following the **general procedure**, the reaction of **1s** and **2g** afforded **3sg** as a colorless oil (eluent: EtOAc/PE = 1/7; 40% yield): IR (film)  $\nu_{\text{max}}$ : 3006, 2988, 2360, 2234, 1715, 1276, 1261 cm<sup>-1</sup>; <sup>1</sup>H NMR (600 MHz, CDCl<sub>3</sub>) δ 7.95 (d, *J* = 8.32 Hz, 2H), 7.87 (d, *J* = 8.32 Hz, 2H), 7.38-7.36 (m, 4H), 4.34 (s, 2H), 3.91 (s, 3H), 3.72 (s, 3H), 2.46 (s, 3H); <sup>13</sup>C NMR (150 MHz, CDCl<sub>3</sub>) δ 167.4, 166.5, 145.2, 134.2, 130.7, 129.7, 129.4, 128.9, 128.1, 127.4, 85.1, 70.4, 52.6, 52.2, 52.1, 21.7; HRMS (ESI) calcd for [C<sub>20</sub>H<sub>19</sub>NO<sub>6</sub>SNa]<sup>+</sup> (M + Na<sup>+</sup>): 424.0825, Found: 424.0811.

#### methyl *N*-(cyclopropylethynyl)-*N*-tosylglycinate (**3sm**)

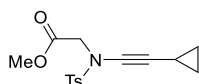

Following the **general procedure**, the reaction of **1s** and **2m** afforded **3sm** as a white solid (eluent: EtOAc/PE = 1/6; 23% yield): mp 71.9-73.0 °C; IR (film)  $\nu_{\text{max}}$ : 3010, 2988, 2360, 1748, 1276, 1261, 1165 cm<sup>-1</sup>; <sup>1</sup>H NMR (600 MHz, CDCl<sub>3</sub>) δ 7.73 (d, *J* = 7.96 Hz, 2H), 7.27 (d, *J* = 7.96 Hz, 2H), 4.11 (s, 2H), 3.61 (s, 3H), 2.38 (s, 3H), 1.21-1.17 (m, 1H), 0.71-0.67 (m, 2H), 0.55-0.53 (m, 2H); <sup>13</sup>C NMR (150 MHz, CDCl<sub>3</sub>) δ 167.8, 144.6, 134.4, 129.4, 128.0, 74.8, 68.4, 52.4, 52.3, 21.7, 8.8, -0.9; HRMS (ESI) calcd for [C<sub>15</sub>H<sub>17</sub>NO<sub>4</sub>SNa]<sup>+</sup> (M + Na<sup>+</sup>): 330.0770, Found: 330.0760.

### 3. Computational Studies

**3.1 Computational methods:** All calculations were carried out with the Gaussian 09 programs<sup>1</sup>. The geometries of all the species were fully optimized by using DFT of the B3LYP method<sup>2-4</sup> with the def2-SVP basis set<sup>5</sup> in conjunction with the SMD implicit solvation model in toluene.<sup>6</sup> All stationary points were verified as either minima (zero imaginary frequencies) or transition states (a single imaginary frequency). Single point energies were conducted over the B3LYP-optimized geometries with M06 functional<sup>7</sup> and the def2-TZVP basis set<sup>5</sup> in conjunction with the SMD implicit solvation model in toluene.<sup>6</sup> The D3 dispersion correction developed by Grimme was added in all the optimization and single point calculations.<sup>8</sup> Minimum energy crossing points (MECP) between triplet and singlet states were located by using the sobMECP program.<sup>9</sup> Reported energies are Gibbs free energies determined by summing these single-point electronic energies and free energy corrections except for the estimation of the MECP energies. The final energies of the MECP are the M06-D3/def2-TZVP calculated single point energies in toluene. Molecular structure graphics were generated using *CYLview 1.0b*.<sup>10</sup>

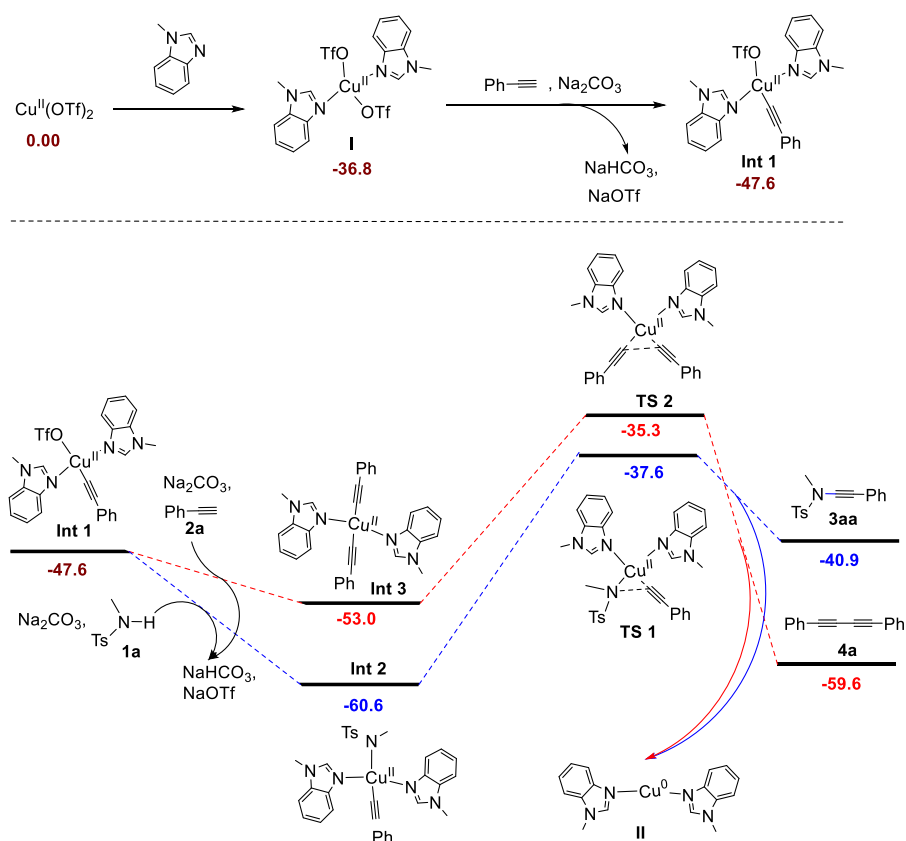

**Figure S2.** DFT calculations on the assumed Cu (II)-mediated cross-dehydrogenation-coupling (CDC) process. The values are relative free energies ( $\Delta G$ , in kcal/mol) of the transition states and intermediates.

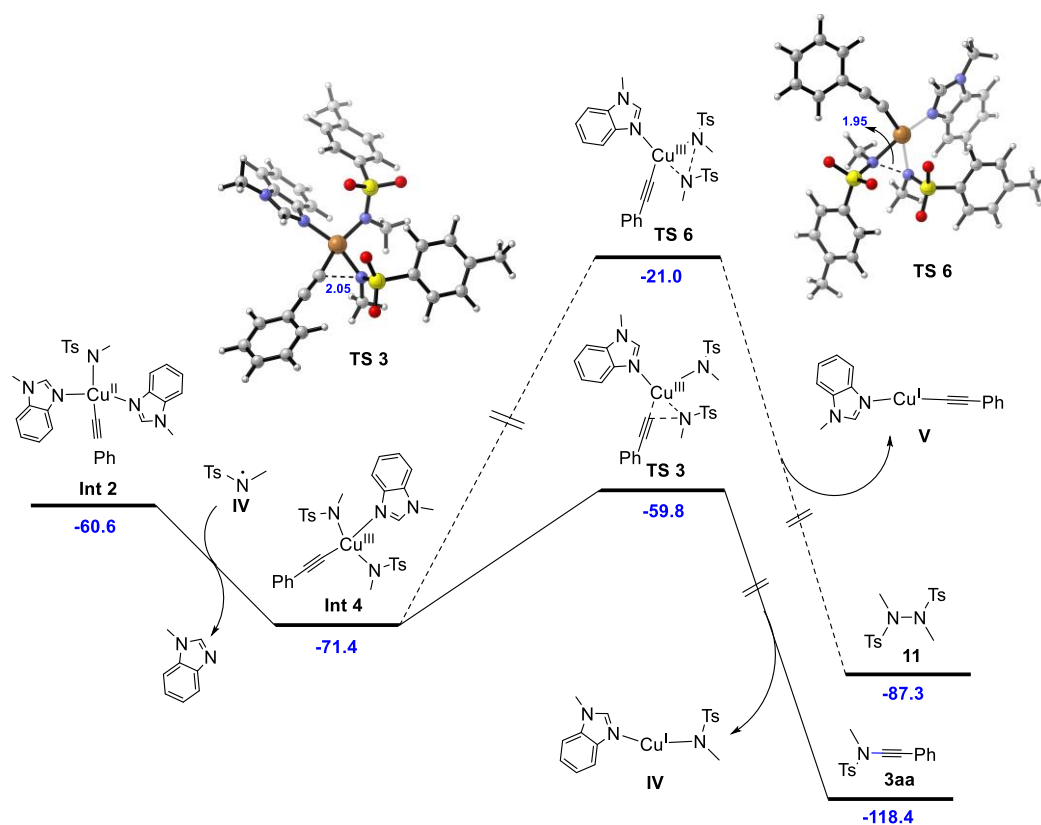

**Figure S3.** DFT calculations on the assumed Cu (III)-mediated cross-dehydrogenation-coupling (CDC) process leading to ynamide. The values are relative free energies ( $\Delta G$ , in kcal/mol) of the transition states and intermediates.

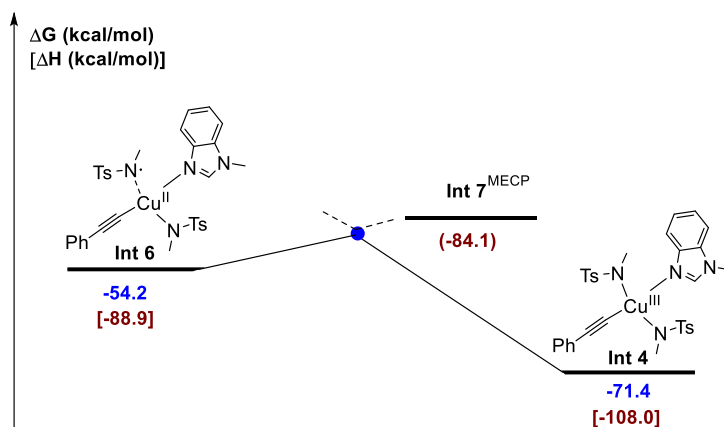

**Figure S4.** MECP between the triplet intermediate **Int6** and singlet intermediate **Int4** potential energy surfaces.

**Comments on Figure S4:** Nitrogen radical **IV** coordinate to Cu(II) intermediate **Int2** (Figure S3) along with the dissociation of ligand, generating a triplet Cu(II) complex **Int6** ( $\Delta H = -88.9$  kcal/mol). The corresponding singlet state intermediate **Int4**, which is more stable by 19.1 kcal/mol, afforded as Cu(III) complex through a minimum energy crossing point **Int7<sup>MECP</sup>**. The relative energy of **Int7<sup>MECP</sup>** is determined to be -84.1 kcal/mol, which is only 4.8 kcal/mol higher than Cu(II) intermediate **Int6**.

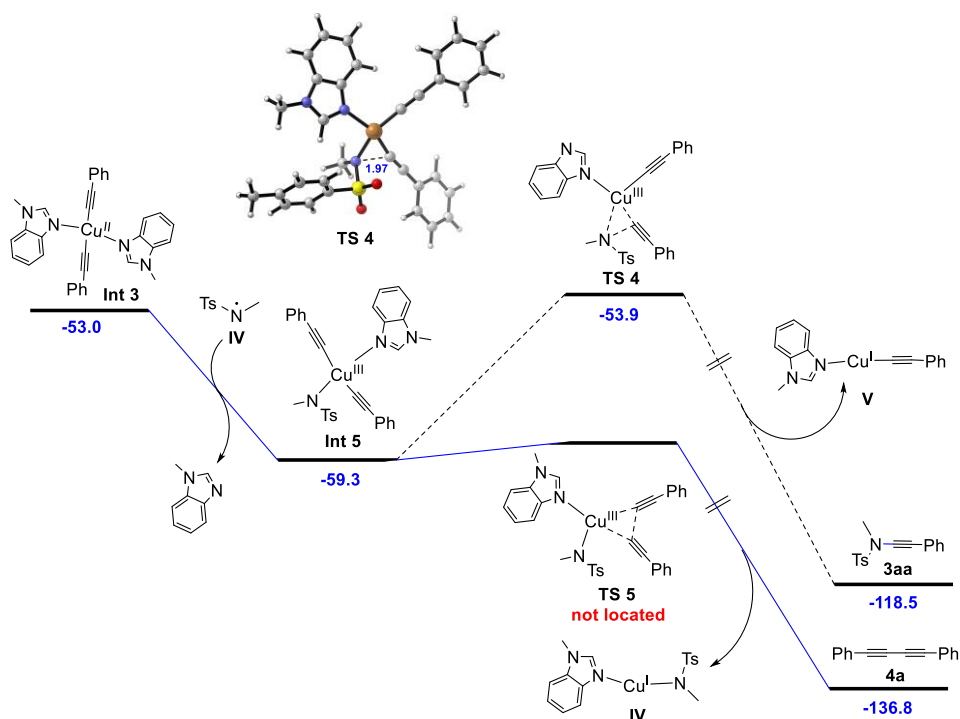

**Figure S5.** DFT calculations on the assumed Cu(III)-mediated cross-dehydrogenation-coupling (CDC) process leading to diyne **4a**. The values are relative free energies ( $\Delta G$ , in kcal/mol) of the transition states and intermediates.

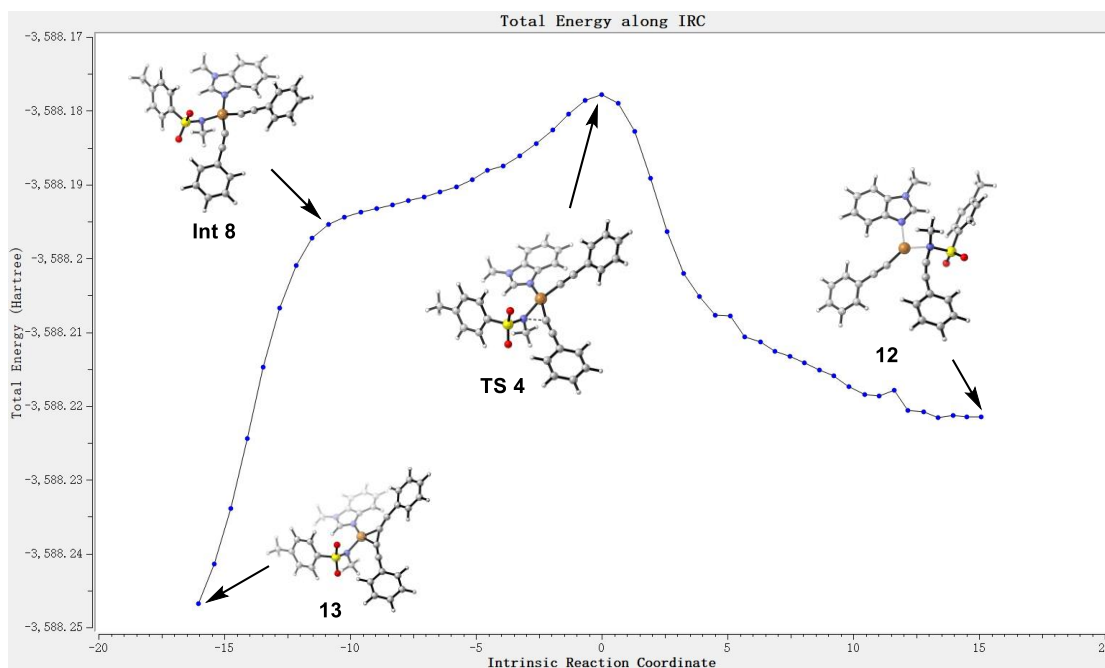

**Figure S6.** IRC analysis of TS 4

**Comments on Figure S5 and S6:** Computational results indicated that the possible Cu(III) intermediate **Int5** ( $-59.3$  kcal/mol) with the coordination of two alkyne anions and one amide anion is thermodynamically comparable to the Cu(II) intermediate **Int2** ( $-60.6$  kcal/mol) (Figure S5). It is suggested that **Int5** may be formed while small amounts of secondary amides was used. When the **Int5** is generated, facile CDC process via **TS4** ( $\Delta G^\ddagger = 5.4$  kcal/mol) leads to ynamide **3aa**. However, the transition state **TS5**, which leads to diyne **4a**, can't be located. IRC analysis of **TS4** verified that the calculated transition state links reactant **Int8** and product ynamide **3aa-V** complex **12**. It is noteworthy that **Int8**



formation promptly produces diyne **4a-IV** complex **13** without any energy penalty (Figure S6). It is suggested that the **Int5** preferentially delivers to diyne **4a** instead of ynamide **3aa**. Indeed, as controlled experimental results shown (Figure S1), the formation of diyne **4a** was facilitated by the presence of small amounts ( $\sim < 1.5$  equiv.) of secondary amides, and gradually inhibited while the amount of amide increased from 1.5 to 3 equiv owing to Cu(III) intermediate **Int4** ( $-71.4$  kcal/mol) being predominantly generated instead of the **Int5**.

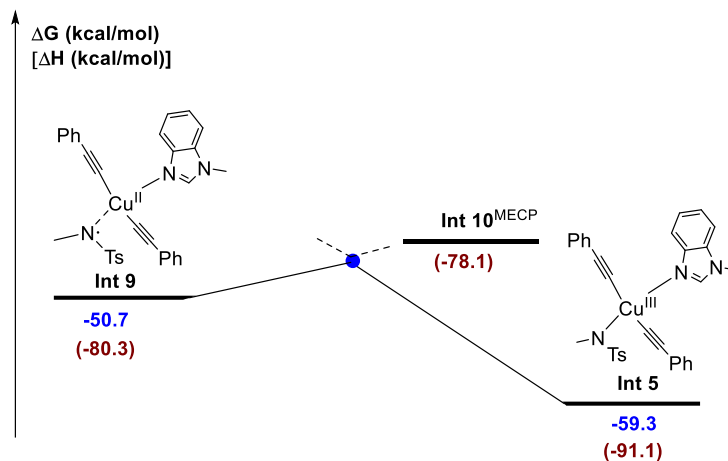

**Figure S7.** MECP between the triplet intermediate **Int9** and singlet intermediate **Int5** potential energy surfaces.

**Comments on Figure S7:** Nitrogen radical coordinate to Cu(II) intermediate **Int3** (Figure S5) along with the dissociation of ligand, forming a triplet Cu(II) complex **Int9** ( $\Delta H = -80.3$  kcal/mol). The corresponding singlet state intermediate **Int5**, which is more stable by 10.8 kcal/mol, afforded as Cu(III) complex through a minimum energy crossing point **Int10<sup>MECP</sup>**. The relative energy of **Int10<sup>MECP</sup>** is determined to be  $-78.1$  kcal/mol, which is only 2.2 kcal/mol higher than Cu(II) intermediate **Int9**.

### 3.2 Molecular Geometries and Energies (in Hartree) :

#### Cu(OTf)<sub>2</sub>

Thermal correction to Gibbs Free Energy = 0.007624

Single-point electronic energies = -3563.547441

Free Energies (298K) = -3563.539817

Charge = 0 Multiplicity = 2

|    |          |          |          |
|----|----------|----------|----------|
| Cu | 0.00001  | 0.00002  | 0.0245   |
| O  | 1.48085  | 0.67179  | -1.16964 |
| S  | 2.42462  | 0.89035  | 0.01234  |
| O  | 1.50499  | 0.64104  | 1.20691  |
| O  | 3.26943  | 2.0627   | 0.01896  |
| C  | 3.52144  | -0.63383 | -0.02308 |
| F  | 4.31272  | -0.63529 | 1.03605  |
| F  | 4.244    | -0.6291  | -1.13036 |
| F  | 2.73668  | -1.70888 | -0.00169 |
| O  | -1.48085 | -0.67171 | -1.16964 |
| S  | -2.42459 | -0.89035 | 0.01234  |
| O  | -1.50502 | -0.64096 | 1.20694  |
| O  | -3.26938 | -2.06272 | 0.01895  |

|   |          |         |          |
|---|----------|---------|----------|
| C | -3.52146 | 0.63379 | -0.02308 |
| F | -2.73673 | 1.70887 | -0.00167 |
| F | -4.31276 | 0.63521 | 1.03604  |
| F | -4.24401 | 0.62903 | -1.13037 |

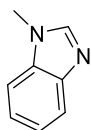

Ligand

Thermal correction to Gibbs Free Energy = 0.114290

Single-point electronic energies = -419.032537

Free Energies (298K) = -418.918247

Charge = 0 Multiplicity = 1

|   |          |          |          |
|---|----------|----------|----------|
| C | 1.757    | -1.1634  | 0.00003  |
| N | 0.66427  | -1.88366 | -0.00008 |
| C | -0.36911 | -0.96294 | 0.00002  |
| C | 0.16051  | 0.35599  | 0.00006  |
| N | 1.53293  | 0.1931   | 0.00027  |
| C | -1.76042 | -1.15328 | -0.00002 |
| C | -2.57692 | -0.02354 | -0.00004 |
| C | -2.03247 | 1.28044  | -0.00001 |
| C | -0.65386 | 1.49494  | 0.00004  |
| C | 2.52019  | 1.25055  | -0.00016 |
| H | -2.17682 | -2.16308 | -0.00007 |
| H | -3.66335 | -0.14439 | -0.00009 |
| H | -2.70755 | 2.14028  | -0.00001 |
| H | -0.23345 | 2.503    | 0.00011  |
| H | 2.41418  | 1.88479  | 0.89482  |
| H | 2.41388  | 1.88429  | -0.89546 |
| H | 3.52664  | 0.81024  | -0.00019 |
| H | 2.7765   | -1.55379 | 0.00008  |

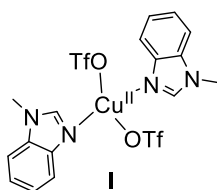

I

Thermal correction to Gibbs Free Energy = 0.282007

Single-point electronic energies = -4401.716980

Free Energies (298K) = -4401.434974

Charge = 0 Multiplicity = 2

|   |          |         |          |
|---|----------|---------|----------|
| C | -2.79496 | 1.56606 | -1.03251 |
| N | -2.29544 | 0.55439 | -0.33947 |
| C | -3.37348 | -0.0985 | 0.24822  |

|    |          |          |          |
|----|----------|----------|----------|
| C  | -4.55357 | 0.57847  | -0.13621 |
| N  | -4.14149 | 1.62785  | -0.94855 |
| C  | -3.43518 | -1.20367 | 1.10765  |
| C  | -4.69573 | -1.60504 | 1.5424   |
| C  | -5.86999 | -0.92889 | 1.14419  |
| C  | -5.82135 | 0.17896  | 0.29996  |
| C  | -5.00702 | 2.61684  | -1.56476 |
| Cu | -0.3627  | 0.08815  | -0.23285 |
| O  | 0.11957  | 1.96578  | -0.70005 |
| S  | -0.03939 | 3.10222  | 0.31919  |
| O  | -0.34474 | 2.60464  | 1.66485  |
| O  | -0.82031 | 4.21273  | -0.23171 |
| C  | 1.72148  | 3.73515  | 0.41547  |
| F  | 1.75048  | 4.86867  | 1.11477  |
| F  | 2.20524  | 3.96863  | -0.8044  |
| F  | 2.50135  | 2.83848  | 1.02263  |
| C  | 1.86471  | -0.95812 | 1.40763  |
| N  | 1.50266  | -0.27969 | 0.33165  |
| C  | 2.66784  | 0.04427  | -0.35189 |
| C  | 3.75788  | -0.48597 | 0.37433  |
| N  | 3.20471  | -1.11233 | 1.48416  |
| C  | 2.87976  | 0.75977  | -1.5377  |
| C  | 4.19654  | 0.91352  | -1.96372 |
| C  | 5.28026  | 0.375    | -1.23487 |
| C  | 5.08204  | -0.33329 | -0.05079 |
| C  | 3.93587  | -1.84616 | 2.5      |
| O  | -0.71984 | -1.78357 | -0.79849 |
| S  | -0.68141 | -3.11496 | -0.05892 |
| O  | -1.76045 | -4.01234 | -0.46018 |
| O  | -0.40163 | -2.95482 | 1.38175  |
| C  | 0.8685   | -3.90274 | -0.76251 |
| F  | 1.95639  | -3.18041 | -0.46415 |
| F  | 0.77902  | -4.00346 | -2.08558 |
| F  | 1.02068  | -5.12034 | -0.24361 |
| H  | -2.53374 | -1.72226 | 1.43095  |
| H  | -4.77729 | -2.467   | 2.20857  |
| H  | -6.83779 | -1.28015 | 1.51009  |
| H  | -6.72524 | 0.71055  | -0.00306 |
| H  | -4.39522 | 3.33917  | -2.12021 |
| H  | -5.57749 | 3.1534   | -0.79153 |
| H  | -5.70894 | 2.12899  | -2.25812 |
| H  | 2.04053  | 1.19659  | -2.07814 |
| H  | 4.39891  | 1.47066  | -2.88157 |
| H  | 6.2975   | 0.52041  | -1.60637 |
| H  | 5.91717  | -0.74774 | 0.51678  |
| H  | 4.45307  | -2.70571 | 2.04664  |
| H  | 3.23268  | -2.21281 | 3.25875  |
| H  | 4.6767   | -1.19183 | 2.9837   |
| H  | -2.19622 | 2.2964   | -1.57242 |
| H  | 1.17233  | -1.40984 | 2.11397  |

Ph-C≡

**2a**

Thermal correction to Gibbs Free Energy = 0.079376

Single-point electronic energies = -308.2658332

Free Energies (298K) = -308.1864572

Charge = 0 Multiplicity = 1

|   |          |          |          |
|---|----------|----------|----------|
| C | -1.51587 | -1.21076 | 0.00001  |
| C | -0.12079 | -1.21581 | -0.00002 |
| C | 0.59497  | -0.00002 | -0.00003 |
| C | -0.12077 | 1.2158   | -0.00002 |
| C | -1.51584 | 1.21078  | 0.00001  |
| C | -2.21737 | 0.00001  | 0.00003  |
| H | -2.05989 | -2.1588  | 0.00003  |
| H | 0.42848  | -2.15982 | -0.00003 |
| H | 0.42853  | 2.15979  | -0.00003 |
| H | -2.05986 | 2.15882  | 0.00002  |
| H | -3.31043 | 0.00003  | 0.00006  |
| C | 2.02833  | -0.00001 | -0.00007 |
| C | 3.24307  | 0.       | -0.00004 |
| H | 4.31875  | 0.00002  | 0.00063  |

**Na<sub>2</sub>CO<sub>3</sub>**

Thermal correction to Gibbs Free Energy = -0.013556

Single-point electronic energies = -588.4985647

Free Energies (298K) = -588.5121207

Charge = 0 Multiplicity = 1

|    |          |          |          |
|----|----------|----------|----------|
| O  | -0.00025 | -0.78056 | -0.00002 |
| C  | -0.00004 | 0.56529  | 0.       |
| O  | 1.12523  | 1.16679  | -0.00026 |
| O  | -1.12505 | 1.16684  | 0.00026  |
| Na | 2.16616  | -0.71897 | 0.00011  |
| Na | -2.16609 | -0.71888 | -0.00009 |

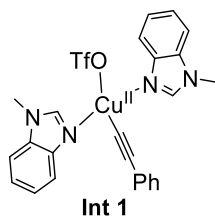

Thermal correction to Gibbs Free Energy = 0.353359

Single-point electronic energies = -3747.8340496

Free Energies (298K) = -3747.4806906

Charge = 0 Multiplicity = 2

|    |          |          |          |
|----|----------|----------|----------|
| Cu | -0.0878  | 0.19859  | 0.21872  |
| O  | -1.57978 | 1.58771  | 0.06867  |
| S  | -2.39905 | 2.19558  | -1.05281 |
| O  | -3.72638 | 2.62422  | -0.61213 |
| O  | -1.61012 | 3.11365  | -1.8951  |
| C  | -2.70508 | 0.72227  | -2.17216 |
| F  | -1.54135 | 0.12559  | -2.4731  |
| F  | -3.49586 | -0.17597 | -1.58182 |
| F  | -3.28203 | 1.1179   | -3.30513 |
| C  | 1.32586  | -1.07637 | -0.20978 |
| C  | 2.27935  | -1.80347 | -0.479   |
| C  | 3.4205   | -2.61728 | -0.77523 |
| C  | 3.29278  | -3.8291  | -1.48923 |
| C  | 4.41334  | -4.61223 | -1.76971 |
| C  | 5.68346  | -4.20722 | -1.34438 |
| C  | 5.82473  | -3.00817 | -0.6362  |
| C  | 4.70937  | -2.21902 | -0.35391 |
| H  | 2.30277  | -4.14595 | -1.82607 |
| H  | 4.29487  | -5.54607 | -2.32607 |
| H  | 6.55971  | -4.82221 | -1.56559 |
| H  | 6.81413  | -2.68381 | -0.30216 |
| H  | 4.82067  | -1.28182 | 0.19617  |
| C  | -1.32842 | -2.4988  | 0.38625  |
| N  | -1.51142 | -1.21876 | 0.66142  |
| C  | -2.76654 | -1.12384 | 1.26427  |
| C  | -3.31838 | -2.42571 | 1.33246  |
| N  | -2.375   | -3.26887 | 0.76157  |
| C  | -3.49347 | -0.02857 | 1.7554   |
| C  | -4.74712 | -0.28352 | 2.30637  |
| C  | -5.28273 | -1.58811 | 2.37365  |
| C  | -4.57719 | -2.68579 | 1.88484  |
| C  | -2.50459 | -4.70405 | 0.59961  |
| H  | -3.09789 | 0.98122  | 1.67468  |
| H  | -5.33745 | 0.55315  | 2.6877   |
| H  | -6.2725  | -1.7387  | 2.81176  |
| H  | -4.98532 | -3.69737 | 1.92705  |
| H  | -2.6354  | -5.18851 | 1.57949  |
| H  | -1.59736 | -5.0999  | 0.12502  |
| H  | -3.37258 | -4.94044 | -0.03512 |
| C  | 1.10147  | 2.89993  | -0.24336 |
| N  | 1.21037  | 1.75433  | 0.40801  |
| C  | 2.40622  | 1.81016  | 1.11223  |
| C  | 3.01146  | 3.06286  | 0.85574  |
| N  | 2.15297  | 3.72252  | -0.01323 |
| C  | 3.0229   | 0.8854   | 1.96613  |
| C  | 4.23796  | 1.25262  | 2.54154  |
| C  | 4.83325  | 2.507    | 2.27934  |
| C  | 4.23094  | 3.43624  | 1.43204  |
| C  | 2.34703  | 5.05135  | -0.56189 |
| H  | 2.56402  | -0.08615 | 2.15186  |

|   |          |          |          |
|---|----------|----------|----------|
| H | 4.74523  | 0.55342  | 3.21088  |
| H | 5.78707  | 2.754    | 2.75201  |
| H | 4.68765  | 4.40664  | 1.22826  |
| H | 2.39683  | 5.79614  | 0.24754  |
| H | 1.50398  | 5.29638  | -1.22084 |
| H | 3.28048  | 5.09101  | -1.14411 |
| H | -0.43052 | -2.89439 | -0.08487 |
| H | 0.26518  | 3.16834  | -0.89113 |

### NaHCO<sub>3</sub>

Thermal correction to Gibbs Free Energy = -0.000026

Single-point electronic energies = -426.7642204

Free Energies (298K) = -426.7642464

Charge = 0 Multiplicity = 1

|    |          |          |          |
|----|----------|----------|----------|
| O  | -0.03927 | -1.13645 | -0.00005 |
| C  | 0.56856  | -0.03985 | 0.00012  |
| O  | 1.92775  | -0.09862 | -0.00001 |
| O  | 0.03504  | 1.10698  | -0.00005 |
| Na | -1.91209 | 0.0402   | 0.00001  |
| H  | 2.2334   | 0.82164  | -0.00001 |

### NaOTf

Thermal correction to Gibbs Free Energy = -0.007099

Single-point electronic energies = -1123.8987516

Free Energies (298K) = -1123.9058506

Charge = 0 Multiplicity = 1

|    |          |          |          |
|----|----------|----------|----------|
| O  | -1.0629  | 0.27198  | 1.22283  |
| S  | -0.31687 | 0.722    | 0.       |
| O  | 0.21897  | 2.07859  | -0.00006 |
| O  | -1.06295 | 0.27191  | -1.22276 |
| C  | 1.16535  | -0.41943 | 0.       |
| F  | 1.91556  | -0.23186 | 1.08288  |
| F  | 1.91558  | -0.23182 | -1.08286 |
| F  | 0.73101  | -1.69375 | -0.00003 |
| Na | -2.52058 | -0.96349 | -0.00001 |

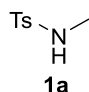

Thermal correction to Gibbs Free Energy = 0.142294

Single-point electronic energies = -914.7101794

Free Energies (298K) = -914.5678854

Charge = 0 Multiplicity = 1

|   |          |          |          |
|---|----------|----------|----------|
| N | -2.32824 | 0.33051  | 1.04379  |
| C | -2.178   | 1.77101  | 1.2004   |
| C | 0.08222  | -0.23567 | -0.2153  |
| C | 0.70354  | 0.8735   | -0.79354 |
| C | 2.08607  | 1.02638  | -0.65822 |
| C | 2.85631  | 0.08505  | 0.04217  |
| C | 2.20311  | -1.02786 | 0.60495  |
| C | 0.82583  | -1.19623 | 0.48108  |
| C | 4.34815  | 0.23991  | 0.18692  |
| S | -1.70219 | -0.41154 | -0.32054 |
| O | -2.02278 | -1.83336 | -0.17465 |
| O | -2.15855 | 0.37979  | -1.46691 |
| H | -2.13197 | -0.22844 | 1.87395  |
| H | -2.79244 | 2.09482  | 2.05369  |
| H | -2.55743 | 2.27039  | 0.29813  |
| H | -1.13327 | 2.0928   | 1.37434  |
| H | 0.11071  | 1.59641  | -1.35664 |
| H | 2.57541  | 1.89168  | -1.11339 |
| H | 2.78932  | -1.77913 | 1.14198  |
| H | 0.32564  | -2.07041 | 0.90292  |
| H | 4.71273  | 1.1631   | -0.28694 |
| H | 4.87865  | -0.61051 | -0.27372 |
| H | 4.64271  | 0.26241  | 1.2496   |

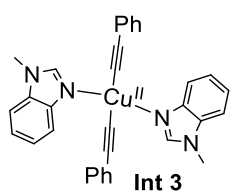

Thermal correction to Gibbs Free Energy = 0.422219

Single-point electronic energies = -3093.9400663

Free Energies (298K) = -3093.5178473

Charge = 0 Multiplicity = 2

|    |          |          |          |
|----|----------|----------|----------|
| Cu | 0.00005  | 0.00005  | -0.58913 |
| C  | 1.88615  | -0.37337 | -0.99721 |
| C  | -1.88607 | 0.3733   | -0.99741 |
| C  | -3.0801  | 0.57348  | -1.22511 |
| C  | -4.47907 | 0.76551  | -1.46267 |
| C  | -4.9492  | 1.81869  | -2.27931 |
| C  | -6.31599 | 1.99907  | -2.49641 |
| C  | -7.24685 | 1.13718  | -1.90545 |
| C  | -6.79654 | 0.08839  | -1.09506 |
| C  | -5.43158 | -0.09934 | -0.87558 |
| C  | 3.08014  | -0.57374 | -1.22494 |
| C  | 4.4791   | -0.766   | -1.46244 |
| C  | 5.43171  | 0.09908  | -0.87588 |
| C  | 6.79665  | -0.08889 | -1.09535 |
| C  | 7.24681  | -1.13816 | -1.9052  |

|   |          |          |          |
|---|----------|----------|----------|
| C | 6.31584  | -2.0003  | -2.49563 |
| C | 4.94908  | -1.81967 | -2.27854 |
| H | -4.22502 | 2.49161  | -2.74486 |
| H | -6.65828 | 2.81934  | -3.13361 |
| H | -8.31691 | 1.28071  | -2.07719 |
| H | -7.51645 | -0.59166 | -0.63104 |
| H | -5.08201 | -0.92037 | -0.24533 |
| H | 5.08227  | 0.92049  | -0.24605 |
| H | 7.51664  | 0.59134  | -0.63174 |
| H | 8.31685  | -1.28188 | -2.07692 |
| H | 6.65801  | -2.82094 | -3.13241 |
| H | 4.22481  | -2.49277 | -2.74368 |
| C | -0.3538  | 2.97928  | -0.01403 |
| N | 0.35502  | 1.90023  | 0.24785  |
| C | 1.36407  | 2.29874  | 1.11329  |
| C | 1.2228   | 3.68595  | 1.35896  |
| N | 0.11808  | 4.08495  | 0.62041  |
| C | 2.39402  | 1.57144  | 1.72659  |
| C | 3.25874  | 2.26649  | 2.56984  |
| C | 3.11082  | 3.65222  | 2.80466  |
| C | 2.08931  | 4.38808  | 2.20509  |
| C | -0.42253 | 5.42821  | 0.55297  |
| H | 2.50427  | 0.50527  | 1.52733  |
| H | 4.07332  | 1.72862  | 3.06136  |
| H | 3.81238  | 4.15809  | 3.47279  |
| H | 1.97092  | 5.45801  | 2.38761  |
| H | -1.29878 | 5.43454  | -0.10857 |
| H | 0.33036  | 6.12551  | 0.1535   |
| H | -0.72981 | 5.76943  | 1.5539   |
| C | 0.35334  | -2.97958 | -0.01425 |
| N | -0.35504 | -1.90028 | 0.24769  |
| C | -1.36388 | -2.2983  | 1.1136   |
| C | -1.22292 | -3.68551 | 1.35951  |
| N | -0.11863 | -4.08499 | 0.62059  |
| C | -2.39336 | -1.57058 | 1.72718  |
| C | -3.25794 | -2.26519 | 2.57092  |
| C | -3.11036 | -3.65091 | 2.80595  |
| C | -2.08932 | -4.38721 | 2.20612  |
| C | 0.42158  | -5.42842 | 0.55321  |
| H | 1.23237  | -2.99041 | -0.65723 |
| H | -2.50336 | -0.50441 | 1.52777  |
| H | -4.07215 | -1.72697 | 3.06267  |
| H | -3.81182 | -4.15644 | 3.47445  |
| H | -1.97118 | -5.45714 | 2.3888   |
| H | -0.33159 | -6.12557 | 0.154    |
| H | 0.72899  | -5.76958 | 1.55412  |
| H | 1.29768  | -5.43508 | -0.10852 |
| H | -1.23305 | 2.98971  | -0.65671 |



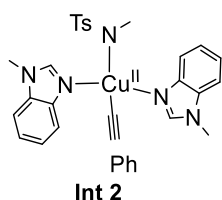

Thermal correction to Gibbs Free Energy = 0.488053

Single-point electronic energies = -3700.3994558

Free Energies (298K) = -3699.9114028

Charge = 0 Multiplicity = 2

|    |          |          |          |
|----|----------|----------|----------|
| Cu | 0.15117  | -0.62297 | -0.08016 |
| C  | 0.75745  | 1.09123  | 0.63372  |
| C  | 1.14778  | 2.17707  | 1.06063  |
| C  | 1.63261  | 3.42579  | 1.56478  |
| C  | 0.74489  | 4.46671  | 1.91903  |
| C  | 1.22731  | 5.68123  | 2.40842  |
| C  | 2.60368  | 5.88894  | 2.55439  |
| C  | 3.49561  | 4.86776  | 2.20634  |
| C  | 3.02007  | 3.65008  | 1.71888  |
| N  | -0.78494 | -2.41227 | -0.15096 |
| C  | -1.44072 | -2.81618 | -1.38564 |
| C  | -2.69651 | -1.64836 | 1.66463  |
| C  | -2.28219 | -0.47793 | 2.31345  |
| C  | -3.20284 | 0.54466  | 2.53923  |
| C  | -4.54431 | 0.42178  | 2.12962  |
| C  | -4.9366  | -0.76442 | 1.48794  |
| C  | -4.02376 | -1.79944 | 1.25662  |
| C  | -5.52798 | 1.53313  | 2.39746  |
| S  | -1.46919 | -2.90449 | 1.23223  |
| O  | -0.44005 | -2.82882 | 2.29554  |
| O  | -2.21187 | -4.16859 | 1.04872  |
| H  | -0.32988 | 4.30613  | 1.80519  |
| H  | 0.52353  | 6.47352  | 2.67861  |
| H  | 2.97924  | 6.8412   | 2.93819  |
| H  | 4.57262  | 5.02134  | 2.31801  |
| H  | 3.71648  | 2.85266  | 1.4491   |
| H  | -0.76137 | -2.58579 | -2.2211  |
| H  | -2.394   | -2.28612 | -1.58653 |
| H  | -1.64761 | -3.89853 | -1.40164 |
| H  | -1.24187 | -0.36898 | 2.62661  |
| H  | -2.87218 | 1.45917  | 3.03987  |
| H  | -5.97599 | -0.88525 | 1.16884  |
| H  | -4.33285 | -2.72657 | 0.77017  |
| H  | -5.78655 | 1.57923  | 3.46966  |
| H  | -6.46522 | 1.39515  | 1.8372   |
| H  | -5.1073  | 2.51623  | 2.12956  |
| C  | 2.21999  | -2.68247 | 0.61215  |
| N  | 1.99779  | -1.53266 | 0.00478  |

|   |          |          |          |
|---|----------|----------|----------|
| C | 3.2319   | -1.06424 | -0.4208  |
| C | 4.21821  | -2.01001 | -0.05125 |
| N | 3.53451  | -3.02224 | 0.60875  |
| C | 3.58978  | 0.10884  | -1.09957 |
| C | 4.93918  | 0.29263  | -1.39772 |
| C | 5.91491  | -0.66117 | -1.03142 |
| C | 5.5732   | -1.8298  | -0.35031 |
| C | 4.12543  | -4.2065  | 1.2005   |
| H | 2.83256  | 0.85076  | -1.35633 |
| H | 5.2527   | 1.19894  | -1.92178 |
| H | 6.96224  | -0.4769  | -1.28354 |
| H | 6.32686  | -2.56533 | -0.06216 |
| H | 3.33511  | -4.80899 | 1.66673  |
| H | 4.85948  | -3.92376 | 1.97097  |
| H | 4.62925  | -4.81138 | 0.4304   |
| C | -2.44507 | 0.74608  | -1.08589 |
| N | -1.24309 | 0.27653  | -1.34646 |
| C | -0.95096 | 0.65023  | -2.64777 |
| C | -2.05246 | 1.36986  | -3.16876 |
| N | -2.98622 | 1.41     | -2.14333 |
| C | 0.18841  | 0.42077  | -3.43055 |
| C | 0.18851  | 0.92664  | -4.72856 |
| C | -0.91651 | 1.64342  | -5.24082 |
| C | -2.05698 | 1.87857  | -4.47258 |
| C | -4.28714 | 2.04813  | -2.19539 |
| H | 1.03768  | -0.13201 | -3.02355 |
| H | 1.06144  | 0.76843  | -5.3664  |
| H | -0.87554 | 2.0235   | -6.26454 |
| H | -2.90923 | 2.43326  | -4.86988 |
| H | -4.89845 | 1.60791  | -2.9984  |
| H | -4.17786 | 3.12822  | -2.37988 |
| H | -4.80164 | 1.90045  | -1.2368  |
| H | -2.96841 | 0.62718  | -0.13931 |
| H | 1.43974  | -3.27043 | 1.09393  |

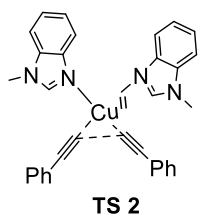

Thermal correction to Gibbs Free Energy = 0.418737

Single-point electronic energies = -3093.908240

Free Energies (298K) = -3093.489502

Charge = 0 Multiplicity = 2

|   |          |          |          |
|---|----------|----------|----------|
| C | -2.84147 | -0.55884 | -0.32368 |
| N | -1.8862  | 0.25619  | 0.26509  |
| C | -2.54647 | 1.07568  | 1.05876  |

|    |          |          |          |
|----|----------|----------|----------|
| N  | -3.88933 | 0.85662  | 1.04574  |
| C  | -4.11787 | -0.19249 | 0.16715  |
| Cu | 0.16106  | 0.36838  | 0.02585  |
| C  | 1.54683  | 1.53635  | -0.77166 |
| C  | 0.73138  | 2.07514  | 0.79864  |
| C  | 0.72224  | 3.25543  | 1.21058  |
| C  | 0.75555  | 4.58825  | 1.67795  |
| C  | 1.86785  | 5.08083  | 2.41341  |
| C  | 1.89359  | 6.39454  | 2.87524  |
| C  | 0.82053  | 7.2616   | 2.62644  |
| C  | -0.28415 | 6.79407  | 1.90118  |
| C  | -0.32146 | 5.48313  | 1.43209  |
| C  | 0.42319  | -2.76792 | 0.23163  |
| N  | 0.82373  | -1.55122 | -0.30074 |
| C  | 1.85003  | -1.8173  | -1.08431 |
| N  | 2.16123  | -3.14094 | -1.1163  |
| C  | 3.23116  | -3.7658  | -1.86914 |
| C  | -4.89988 | 1.57772  | 1.7946   |
| C  | 1.26058  | -3.78752 | -0.28201 |
| C  | 2.64718  | 1.84621  | -1.26493 |
| C  | 3.89227  | 2.19972  | -1.84289 |
| C  | 5.06867  | 1.45856  | -1.55501 |
| C  | 6.2893   | 1.79963  | -2.13441 |
| C  | 6.38075  | 2.88581  | -3.01463 |
| C  | 5.23071  | 3.63142  | -3.30615 |
| C  | 4.00469  | 3.29906  | -2.73329 |
| C  | -0.61063 | -3.07828 | 1.12522  |
| C  | -0.77805 | -4.41612 | 1.476    |
| C  | 0.06122  | -5.42694 | 0.95524  |
| C  | 1.09691  | -5.13298 | 0.06813  |
| C  | -2.70802 | -1.59948 | -1.25271 |
| C  | -3.86986 | -2.2512  | -1.66056 |
| C  | -5.13896 | -1.88065 | -1.16112 |
| C  | -5.28807 | -0.84428 | -0.23938 |
| H  | 2.40289  | -1.05963 | -1.63966 |
| H  | 2.82346  | -4.49644 | -2.5852  |
| H  | 3.92742  | -4.28173 | -1.18979 |
| H  | 3.78237  | -2.99446 | -2.42309 |
| H  | -5.44698 | 0.89236  | 2.46069  |
| H  | -5.6161  | 2.05739  | 1.10942  |
| H  | -4.41653 | 2.35348  | 2.40273  |
| H  | 2.70781  | 4.4103   | 2.60877  |
| H  | 2.7626   | 6.75009  | 3.43648  |
| H  | 0.84615  | 8.29154  | 2.99152  |
| H  | -1.12476 | 7.46363  | 1.69662  |
| H  | -1.18228 | 5.12674  | 0.86079  |
| H  | 5.00453  | 0.61588  | -0.86201 |
| H  | 7.18232  | 1.21506  | -1.89475 |
| H  | 7.34003  | 3.15106  | -3.46653 |
| H  | 5.29213  | 4.48417  | -3.98833 |

|   |          |          |          |
|---|----------|----------|----------|
| H | 3.11149  | 3.88462  | -2.96254 |
| H | -1.25041 | -2.28741 | 1.519    |
| H | -1.57585 | -4.69372 | 2.1692   |
| H | -0.10459 | -6.46427 | 1.25661  |
| H | 1.74661  | -5.91422 | -0.33143 |
| H | -2.07494 | 1.85616  | 1.65608  |
| H | -1.72228 | -1.87376 | -1.63066 |
| H | -3.80188 | -3.06841 | -2.38284 |
| H | -6.02524 | -2.41833 | -1.50723 |
| H | -6.26898 | -0.55621 | 0.14384  |

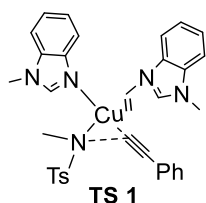

Thermal correction to Gibbs Free Energy = 0.488512

Single-point electronic energies = -3700.363195

Free Energies (298K) = -3699.874683

Charge = 0 Multiplicity = 2

|    |          |          |          |
|----|----------|----------|----------|
| C  | 2.10675  | -1.38229 | 1.77833  |
| C  | 2.05115  | 0.05787  | 3.38755  |
| N  | 3.2673   | -0.55203 | 3.49024  |
| C  | 4.29811  | -0.28822 | 4.47403  |
| C  | 3.33684  | -1.48526 | 2.46749  |
| Cu | -0.50251 | 0.10371  | 1.70581  |
| C  | -2.34826 | -0.40093 | 1.87354  |
| C  | -3.60392 | -0.46482 | 2.00456  |
| C  | -5.01119 | -0.55446 | 1.96848  |
| C  | -5.70034 | -0.28838 | 0.75329  |
| C  | -7.08796 | -0.37352 | 0.69362  |
| C  | -7.83086 | -0.72117 | 1.83112  |
| C  | -7.1656  | -0.99557 | 3.03366  |
| C  | -5.7766  | -0.91811 | 3.10711  |
| N  | -0.29195 | 1.43754  | 0.06957  |
| N  | 1.33095  | -0.40032 | 2.38352  |
| C  | -1.42862 | 1.75454  | -0.51843 |
| C  | 0.65021  | 1.38458  | -0.94842 |
| N  | -1.31175 | 1.92622  | -1.8614  |
| C  | -2.4061  | 2.06225  | -2.80063 |
| C  | 0.01413  | 1.68065  | -2.18142 |
| C  | 2.01247  | 1.05772  | -0.91921 |
| C  | 2.70065  | 1.02766  | -2.13181 |
| C  | 2.05419  | 1.31682  | -3.35402 |
| C  | 0.69823  | 1.64692  | -3.40135 |
| C  | 1.83802  | -2.18637 | 0.66312  |
| C  | 2.8262   | -3.08373 | 0.26722  |

|   |          |          |          |
|---|----------|----------|----------|
| C | 4.05335  | -3.18319 | 0.96249  |
| C | 4.33327  | -2.38794 | 2.07416  |
| S | -2.51717 | -1.96773 | -0.63354 |
| O | -3.67392 | -2.86994 | -0.47315 |
| O | -2.74781 | -0.6243  | -1.20254 |
| H | 1.73872  | 0.83892  | 4.07931  |
| H | 5.22704  | 0.03765  | 3.98022  |
| H | 4.50776  | -1.19367 | 5.06485  |
| H | 3.96013  | 0.50686  | 5.15171  |
| H | -5.11094 | -0.05894 | -0.13659 |
| H | -7.60007 | -0.17666 | -0.25261 |
| H | -8.92091 | -0.78546 | 1.77851  |
| H | -7.73871 | -1.27455 | 3.92247  |
| H | -5.25931 | -1.13407 | 4.04493  |
| H | -2.38897 | 1.80546  | -0.0104  |
| H | -2.60792 | 1.09468  | -3.28493 |
| H | -2.16473 | 2.8208   | -3.56001 |
| H | 2.50046  | 0.81784  | 0.02561  |
| H | 3.76211  | 0.76745  | -2.13991 |
| H | 2.6269   | 1.27645  | -4.28408 |
| H | 0.19427  | 1.85716  | -4.34677 |
| H | -3.30905 | 2.37459  | -2.26023 |
| H | 0.88512  | -2.09139 | 0.14237  |
| H | 2.64797  | -3.72349 | -0.60019 |
| H | 4.80255  | -3.9016  | 0.62018  |
| H | 5.28186  | -2.46635 | 2.60899  |
| N | -1.62933 | -1.79825 | 0.76317  |
| C | -1.33566 | -2.795   | -1.71067 |
| C | -1.44283 | -4.16731 | -1.93712 |
| C | -0.28686 | -2.05487 | -2.27036 |
| C | -0.48187 | -4.8052  | -2.72902 |
| H | -2.27653 | -4.72126 | -1.50183 |
| C | 0.66179  | -2.70444 | -3.05577 |
| H | -0.21438 | -0.98333 | -2.08543 |
| C | 0.58319  | -4.08998 | -3.29686 |
| H | -0.56512 | -5.8807  | -2.9088  |
| H | 1.48215  | -2.12524 | -3.48861 |
| C | 1.62482  | -4.76992 | -4.14842 |
| H | 1.45402  | -5.8545  | -4.21808 |
| H | 1.62675  | -4.36099 | -5.17316 |
| H | 2.63723  | -4.61029 | -3.7403  |
| C | -1.52981 | -3.00706 | 1.57034  |
| H | -0.94678 | -2.74774 | 2.46625  |
| H | -2.51091 | -3.40282 | 1.88445  |
| H | -0.98456 | -3.80284 | 1.02909  |

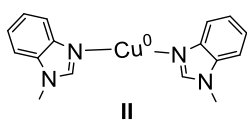

Thermal correction to Gibbs Free Energy = 0.238678

Single-point electronic energies = -2478.559333

Free Energies (298K) = -2478.320655

Charge = 0 Multiplicity = 2

|    |          |          |          |
|----|----------|----------|----------|
| C  | 2.10675  | -1.38229 | 1.77833  |
| C  | 2.05115  | 0.05787  | 3.38755  |
| N  | 3.2673   | -0.55203 | 3.49024  |
| C  | 4.29811  | -0.28822 | 4.47403  |
| C  | 3.33684  | -1.48526 | 2.46749  |
| Cu | -0.50251 | 0.10371  | 1.70581  |
| C  | -2.34826 | -0.40093 | 1.87354  |
| C  | -3.60392 | -0.46482 | 2.00456  |
| C  | -5.01119 | -0.55446 | 1.96848  |
| C  | -5.70034 | -0.28838 | 0.75329  |
| C  | -7.08796 | -0.37352 | 0.69362  |
| C  | -7.83086 | -0.72117 | 1.83112  |
| C  | -7.1656  | -0.99557 | 3.03366  |
| C  | -5.7766  | -0.91811 | 3.10711  |
| N  | -0.29195 | 1.43754  | 0.06957  |
| N  | 1.33095  | -0.40032 | 2.38352  |
| C  | -1.42862 | 1.75454  | -0.51843 |
| C  | 0.65021  | 1.38458  | -0.94842 |
| N  | -1.31175 | 1.92622  | -1.8614  |
| C  | -2.4061  | 2.06225  | -2.80063 |
| C  | 0.01413  | 1.68065  | -2.18142 |
| C  | 2.01247  | 1.05772  | -0.91921 |
| C  | 2.70065  | 1.02766  | -2.13181 |
| C  | 2.05419  | 1.31682  | -3.35402 |
| C  | 0.69823  | 1.64692  | -3.40135 |
| C  | 1.83802  | -2.18637 | 0.66312  |
| C  | 2.8262   | -3.08373 | 0.26722  |
| C  | 4.05335  | -3.18319 | 0.96249  |
| C  | 4.33327  | -2.38794 | 2.07416  |
| S  | -2.51717 | -1.96773 | -0.63354 |
| O  | -3.67392 | -2.86994 | -0.47315 |
| O  | -2.74781 | -0.6243  | -1.20254 |
| H  | 1.73872  | 0.83892  | 4.07931  |
| H  | 5.22704  | 0.03765  | 3.98022  |
| H  | 4.50776  | -1.19367 | 5.06485  |
| H  | 3.96013  | 0.50686  | 5.15171  |
| H  | -5.11094 | -0.05894 | -0.13659 |
| H  | -7.60007 | -0.17666 | -0.25261 |
| H  | -8.92091 | -0.78546 | 1.77851  |
| H  | -7.73871 | -1.27455 | 3.92247  |
| H  | -5.25931 | -1.13407 | 4.04493  |
| H  | -2.38897 | 1.80546  | -0.0104  |
| H  | -2.60792 | 1.09468  | -3.28493 |
| H  | -2.16473 | 2.8208   | -3.56001 |

|   |          |          |          |
|---|----------|----------|----------|
| H | 2.50046  | 0.81784  | 0.02561  |
| H | 3.76211  | 0.76745  | -2.13991 |
| H | 2.6269   | 1.27645  | -4.28408 |
| H | 0.19427  | 1.85716  | -4.34677 |
| H | -3.30905 | 2.37459  | -2.26023 |
| H | 0.88512  | -2.09139 | 0.14237  |
| H | 2.64797  | -3.72349 | -0.60019 |
| H | 4.80255  | -3.9016  | 0.62018  |
| H | 5.28186  | -2.46635 | 2.60899  |
| N | -1.62933 | -1.79825 | 0.76317  |
| C | -1.33566 | -2.795   | -1.71067 |
| C | -1.44283 | -4.16731 | -1.93712 |
| C | -0.28686 | -2.05487 | -2.27036 |
| C | -0.48187 | -4.8052  | -2.72902 |
| H | -2.27653 | -4.72126 | -1.50183 |
| C | 0.66179  | -2.70444 | -3.05577 |
| H | -0.21438 | -0.98333 | -2.08543 |
| C | 0.58319  | -4.08998 | -3.29686 |
| H | -0.56512 | -5.8807  | -2.9088  |
| H | 1.48215  | -2.12524 | -3.48861 |
| C | 1.62482  | -4.76992 | -4.14842 |
| H | 1.45402  | -5.8545  | -4.21808 |
| H | 1.62675  | -4.36099 | -5.17316 |
| H | 2.63723  | -4.61029 | -3.7403  |
| C | -1.52981 | -3.00706 | 1.57034  |
| H | -0.94678 | -2.74774 | 2.46625  |
| H | -2.51091 | -3.40282 | 1.88445  |
| H | -0.98456 | -3.80284 | 1.02909  |

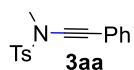

Thermal correction to Gibbs Free Energy = 0.220953

Single-point electronic energies = -1221.780281

Free Energies (298K) = -1221.559328

Charge = 0 Multiplicity = 1

|   |          |          |          |
|---|----------|----------|----------|
| C | -0.78702 | 1.35994  | -0.53054 |
| C | -1.85241 | 0.78061  | -0.40704 |
| N | 0.39593  | 1.98425  | -0.64338 |
| C | 0.92426  | 2.32275  | -1.96989 |
| C | -3.09527 | 0.10458  | -0.2172  |
| C | -3.53757 | -0.21262 | 1.08688  |
| C | -4.74369 | -0.8865  | 1.27779  |
| C | -5.53551 | -1.24881 | 0.18199  |
| C | -5.10853 | -0.93338 | -1.11281 |
| C | -3.89978 | -0.26732 | -1.31661 |
| C | 2.11508  | 0.0621   | 0.37658  |
| C | 1.38593  | -1.01073 | 0.90399  |

|   |          |          |          |
|---|----------|----------|----------|
| C | 1.81339  | -2.3088  | 0.63407  |
| C | 2.95697  | -2.55413 | -0.14837 |
| C | 3.67221  | -1.45499 | -0.65206 |
| C | 3.26016  | -0.14572 | -0.39739 |
| C | 3.3855   | -3.9679  | -0.44197 |
| S | 1.53223  | 1.72591  | 0.64973  |
| O | 0.74975  | 1.75911  | 1.88116  |
| O | 2.62385  | 2.66486  | 0.39041  |
| H | 1.26309  | 1.42556  | -2.51686 |
| H | 1.75831  | 3.02493  | -1.85141 |
| H | 0.12638  | 2.81488  | -2.54347 |
| H | -2.92413 | 0.07751  | 1.94293  |
| H | -5.07106 | -1.1268  | 2.29287  |
| H | -6.4817  | -1.77354 | 0.33665  |
| H | -5.72171 | -1.21178 | -1.97412 |
| H | -3.56673 | -0.02799 | -2.32902 |
| H | 0.50615  | -0.82437 | 1.52148  |
| H | 1.25091  | -3.1523  | 1.04365  |
| H | 4.5719   | -1.62499 | -1.24933 |
| H | 3.82583  | 0.70605  | -0.77891 |
| H | 2.69189  | -4.44327 | -1.1572  |
| H | 3.37769  | -4.58533 | 0.47067  |
| H | 4.39492  | -4.00908 | -0.87714 |

Ph—C≡C—Ph

**4a**

Thermal correction to Gibbs Free Energy = 0.159035

Single-point electronic energies = -615.366169

Free Energies (298K) = -615.207134

Charge = 0 Multiplicity = 1

|   |          |          |          |
|---|----------|----------|----------|
| C | -5.44543 | 0.85736  | 0.85566  |
| C | -4.05113 | 0.86186  | 0.85983  |
| C | -3.33385 | 0.0001   | -0.00016 |
| C | -4.05122 | -0.86178 | -0.85997 |
| C | -5.44551 | -0.85753 | -0.85541 |
| C | -6.14674 | -0.00015 | 0.00023  |
| H | -5.98964 | 1.52829  | 1.52525  |
| H | -3.50213 | 1.53017  | 1.52659  |
| H | -3.50227 | -1.52999 | -1.52687 |
| H | -5.98979 | -1.52857 | -1.52485 |
| H | -7.23975 | -0.00027 | 0.00039  |
| C | -1.90797 | 0.00016  | -0.00025 |
| C | -0.68262 | 0.00012  | -0.00024 |
| C | 0.6826   | 0.00015  | -0.00013 |
| C | 1.90796  | 0.00015  | -0.00004 |
| C | 3.33385  | 0.00007  | 0.       |
| C | 4.05108  | -0.86096 | 0.86078  |
| C | 4.05128  | 0.86098  | -0.86071 |



|   |         |          |          |
|---|---------|----------|----------|
| C | 5.44537 | -0.85671 | 0.85646  |
| H | 3.50203 | -1.52858 | 1.52819  |
| C | 5.44558 | 0.8565   | -0.8563  |
| H | 3.5024  | 1.52869  | -1.52817 |
| C | 6.14675 | -0.00017 | 0.00011  |
| H | 5.98954 | -1.52711 | 1.52663  |
| H | 5.9899  | 1.5268   | -1.52643 |
| H | 7.23975 | -0.00026 | 0.00015  |

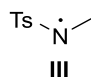

Thermal correction to Gibbs Free Energy = 0.126510

Single-point electronic energies = -914.040424

Free Energies (298K) = -913.913914

Charge = 0 Multiplicity = 2

|   |          |          |          |
|---|----------|----------|----------|
| N | -2.10319 | -0.03157 | 1.20898  |
| C | -3.5383  | -0.01506 | 1.30769  |
| C | 0.20223  | 0.00537  | -0.19562 |
| C | 0.87769  | 1.22356  | -0.10639 |
| C | 2.26229  | 1.21337  | 0.07246  |
| C | 2.97491  | 0.00642  | 0.16031  |
| C | 2.26265  | -1.2033  | 0.05939  |
| C | 0.88122  | -1.2149  | -0.11905 |
| C | 4.46916  | -0.01053 | 0.34993  |
| S | -1.56642 | 0.00433  | -0.40633 |
| O | -1.97466 | -1.26306 | -1.03239 |
| O | -1.98137 | 1.28969  | -0.98926 |
| H | -3.8318  | -0.0375  | 2.36683  |
| H | -3.98207 | -0.88454 | 0.7826   |
| H | -3.96066 | 0.88846  | 0.82452  |
| H | 0.32627  | 2.16218  | -0.18455 |
| H | 2.79962  | 2.1628   | 0.14169  |
| H | 2.8038   | -2.15179 | 0.1182   |
| H | 0.33087  | -2.15327 | -0.20747 |
| H | 4.88325  | 1.00428  | 0.44088  |
| H | 4.96781  | -0.50671 | -0.49981 |
| H | 4.74516  | -0.57478 | 1.25645  |

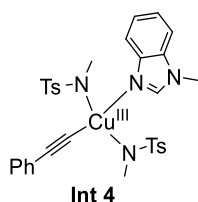

Thermal correction to Gibbs Free Energy = 0.515585

Single-point electronic energies = -4195.439750

Free Energies (298K) = -4194.924164

Charge = 0 Multiplicity = 1

|    |          |          |          |
|----|----------|----------|----------|
| Cu | -1.18715 | 0.07634  | -0.68917 |
| N  | -1.22765 | 1.97717  | -1.06426 |
| C  | -3.94177 | 1.0334   | -0.91987 |
| N  | -3.21781 | -0.0144  | -0.56332 |
| C  | -4.12312 | -0.97777 | -0.1066  |
| C  | -5.42792 | -0.43496 | -0.22408 |
| N  | -5.26536 | 0.84152  | -0.74303 |
| C  | -3.96164 | -2.27119 | 0.41697  |
| C  | -5.10972 | -2.96908 | 0.78817  |
| C  | -6.40065 | -2.41675 | 0.65456  |
| C  | -6.582   | -1.13233 | 0.14663  |
| C  | -6.32463 | 1.79678  | -1.00458 |
| C  | 0.62163  | 0.10504  | -1.02626 |
| C  | 1.80851  | 0.13302  | -1.30882 |
| C  | 3.21047  | 0.18143  | -1.58586 |
| C  | 3.86213  | -0.89964 | -2.21545 |
| C  | 5.23798  | -0.86019 | -2.44227 |
| C  | 5.98911  | 0.2507   | -2.04027 |
| C  | 5.3522   | 1.32865  | -1.41471 |
| C  | 3.9747   | 1.30046  | -1.19158 |
| C  | -0.5338  | 2.54694  | -2.2149  |
| N  | -0.95492 | -1.80449 | -0.41539 |
| C  | -0.80299 | -2.65232 | -1.58316 |
| C  | 1.46429  | -2.61421 | 0.84576  |
| C  | 1.90082  | -3.82187 | 0.29126  |
| C  | 3.27031  | -4.04131 | 0.13459  |
| C  | 4.21286  | -3.07938 | 0.53705  |
| C  | 3.74398  | -1.88598 | 1.10979  |
| C  | 2.37961  | -1.64671 | 1.26389  |
| C  | 5.68909  | -3.32949 | 0.36903  |
| S  | -0.29294 | -2.30166 | 1.02097  |
| O  | -0.90358 | -3.61448 | 1.31289  |
| O  | -0.46882 | -1.17637 | 1.95281  |
| S  | -1.23383 | 2.91069  | 0.31626  |
| C  | 0.44097  | 2.99324  | 0.95283  |
| O  | -1.62121 | 4.27465  | -0.08856 |
| O  | -2.04147 | 2.17511  | 1.30056  |
| C  | 1.27072  | 4.05449  | 0.58711  |
| C  | 2.58371  | 4.08803  | 1.06663  |
| C  | 3.07158  | 3.07963  | 1.91206  |
| C  | 2.20448  | 2.03195  | 2.27363  |
| C  | 0.89651  | 1.97393  | 1.79757  |
| H  | -2.9796  | -2.71313 | 0.54989  |
| H  | -5.00072 | -3.97408 | 1.20325  |
| H  | -7.27118 | -3.00203 | 0.96104  |
| H  | -7.5738  | -0.68737 | 0.04615  |
| H  | -5.88705 | 2.72502  | -1.39425 |
| H  | -6.86943 | 2.02322  | -0.07521 |
| H  | -7.03136 | 1.39273  | -1.7458  |

|   |          |          |          |
|---|----------|----------|----------|
| H | -3.51081 | 1.96182  | -1.28543 |
| H | 3.27956  | -1.77519 | -2.50824 |
| H | 5.73029  | -1.70655 | -2.92821 |
| H | 7.06787  | 0.27601  | -2.21513 |
| H | 5.93204  | 2.20034  | -1.09957 |
| H | 3.47638  | 2.13543  | -0.69689 |
| H | 0.55193  | 2.67859  | -2.06207 |
| H | -0.98104 | 3.52324  | -2.46306 |
| H | -0.6743  | 1.87017  | -3.06927 |
| H | 0.22786  | -2.6731  | -1.98173 |
| H | -1.47308 | -2.27587 | -2.37127 |
| H | -1.11877 | -3.68165 | -1.34085 |
| H | 1.17676  | -4.58452 | 0.00038  |
| H | 3.61482  | -4.98105 | -0.30634 |
| H | 4.45808  | -1.11869 | 1.41965  |
| H | 2.01872  | -0.71121 | 1.68648  |
| H | 6.08091  | -3.9385  | 1.203    |
| H | 6.25843  | -2.38848 | 0.34888  |
| H | 5.90148  | -3.87979 | -0.561   |
| H | 0.8847   | 4.84979  | -0.0527  |
| H | 3.23759  | 4.91664  | 0.78103  |
| H | 2.56641  | 1.24508  | 2.9415   |
| H | 0.23704  | 1.14635  | 2.06831  |
| C | 4.49629  | 3.08471  | 2.40185  |
| H | 5.01006  | 4.02785  | 2.16338  |
| H | 4.54632  | 2.93246  | 3.49237  |
| H | 5.06796  | 2.26298  | 1.9363   |

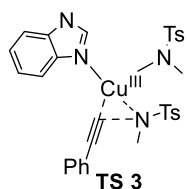

Thermal correction to Gibbs Free Energy = 0.512605

Single-point electronic energies = -4195.418286

Free Energies (298K) = -4194.905682

Charge = 0 Multiplicity = 1

|    |          |          |          |
|----|----------|----------|----------|
| Cu | -0.30946 | -1.13249 | -1.07418 |
| N  | -1.56495 | -2.58983 | -0.88603 |
| C  | 0.18831  | 1.7403   | -1.43026 |
| N  | 0.56371  | 0.5099   | -1.71965 |
| C  | 1.7512   | 0.60356  | -2.42788 |
| C  | 2.07642  | 1.97363  | -2.5532  |
| N  | 1.06209  | 2.66387  | -1.90063 |
| C  | 2.58368  | -0.38218 | -2.97289 |
| C  | 3.72739  | 0.04424  | -3.64138 |
| C  | 4.04441  | 1.41557  | -3.76465 |

|   |          |          |          |
|---|----------|----------|----------|
| C | 3.22695  | 2.40624  | -3.22244 |
| C | 0.97226  | 4.10459  | -1.75359 |
| C | -2.0571  | -0.73253 | -1.59286 |
| C | -3.15    | -0.30825 | -1.95357 |
| C | -4.46381 | 0.15343  | -2.2692  |
| C | -5.53878 | -0.23978 | -1.439   |
| C | -6.83411 | 0.19365  | -1.71967 |
| C | -7.08193 | 1.01531  | -2.8261  |
| C | -6.02395 | 1.40361  | -3.65626 |
| C | -4.7228  | 0.98048  | -3.38264 |
| C | -2.02472 | -3.44839 | -1.96879 |
| N | 1.3202   | -2.004   | -0.35494 |
| C | 1.6342   | -3.38422 | -0.67396 |
| C | 3.75495  | -0.86572 | 0.2742   |
| C | 4.05841  | 0.47039  | -0.00204 |
| C | 5.30982  | 0.79816  | -0.52047 |
| C | 6.27416  | -0.19152 | -0.77795 |
| C | 5.95287  | -1.52439 | -0.47631 |
| C | 4.70642  | -1.86602 | 0.05557  |
| C | 7.60574  | 0.18399  | -1.37674 |
| S | 2.10969  | -1.30333 | 0.87146  |
| O | 2.34354  | -2.26444 | 1.97631  |
| O | 1.42102  | -0.0312  | 1.17119  |
| S | -2.4855  | -2.61866 | 0.54927  |
| C | -1.77648 | -4.04462 | 1.35562  |
| O | -2.11687 | -1.41493 | 1.29833  |
| O | -3.89348 | -2.91348 | 0.2385   |
| C | -0.51946 | -3.91105 | 1.95693  |
| C | 0.05271  | -5.02626 | 2.56131  |
| C | -0.60947 | -6.26872 | 2.58091  |
| C | -1.87131 | -6.36568 | 1.97208  |
| C | -2.46368 | -5.25979 | 1.35627  |
| H | 2.34177  | -1.43696 | -2.84658 |
| H | 4.4065   | -0.69806 | -4.0667  |
| H | 4.95638  | 1.70563  | -4.29208 |
| H | 3.47361  | 3.46572  | -3.31272 |
| H | 0.91444  | 4.58708  | -2.74141 |
| H | 1.85387  | 4.48736  | -1.21702 |
| H | 0.07108  | 4.35562  | -1.17945 |
| H | -0.71273 | 1.99522  | -0.87496 |
| H | -5.33335 | -0.89721 | -0.59098 |
| H | -7.65864 | -0.11619 | -1.07213 |
| H | -8.09945 | 1.35121  | -3.0425  |
| H | -6.21477 | 2.04279  | -4.52245 |
| H | -3.89471 | 1.2849   | -4.02703 |
| H | -3.06011 | -3.23494 | -2.27966 |
| H | -1.94809 | -4.50174 | -1.64555 |
| H | -1.35182 | -3.31137 | -2.82628 |
| H | 0.74698  | -3.84216 | -1.13983 |
| H | 1.87196  | -3.98294 | 0.22105  |

|   |          |          |          |
|---|----------|----------|----------|
| H | 2.47875  | -3.48047 | -1.38693 |
| H | 3.30772  | 1.23665  | 0.19292  |
| H | 5.54271  | 1.84421  | -0.73872 |
| H | 6.69382  | -2.30956 | -0.652   |
| H | 4.47974  | -2.90239 | 0.31226  |
| H | 8.28947  | -0.67641 | -1.43139 |
| H | 8.10108  | 0.97534  | -0.78986 |
| H | 7.47782  | 0.57744  | -2.40037 |
| H | 0.01762  | -2.96382 | 1.94284  |
| H | 1.03812  | -4.92294 | 3.02337  |
| H | -2.40332 | -7.32083 | 1.98177  |
| H | -3.44771 | -5.32994 | 0.88968  |
| C | 0.02852  | -7.45456 | 3.25655  |
| H | -0.54041 | -8.38077 | 3.08698  |
| H | 1.05808  | -7.61132 | 2.8947   |
| H | 0.09514  | -7.2936  | 4.34632  |

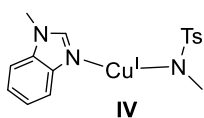

Thermal correction to Gibbs Free Energy = 0.262532

Single-point electronic energies = -2973.702333

Free Energies (298K) = -2973.439802

Charge = 0 Multiplicity = 1

|    |          |          |          |
|----|----------|----------|----------|
| Cu | -0.48341 | -1.09438 | -0.40419 |
| C  | -2.24275 | 0.21062  | 1.36789  |
| N  | -2.09505 | -0.23329 | 0.12967  |
| C  | -3.2764  | 0.06271  | -0.534   |
| C  | -4.14786 | 0.71158  | 0.37143  |
| N  | -3.45342 | 0.78811  | 1.57081  |
| C  | -3.66937 | -0.18114 | -1.85606 |
| C  | -4.94227 | 0.23867  | -2.23457 |
| C  | -5.80715 | 0.88628  | -1.32311 |
| C  | -5.42793 | 1.1353   | -0.00456 |
| C  | -3.94515 | 1.36987  | 2.80571  |
| N  | 1.23269  | -1.8659  | -0.54749 |
| C  | 1.95335  | -2.41529 | -1.68402 |
| C  | 3.01407  | 0.03492  | 0.30852  |
| C  | 2.29221  | 1.21042  | 0.06299  |
| C  | 2.96948  | 2.363    | -0.32555 |
| C  | 4.37022  | 2.36843  | -0.47913 |
| C  | 5.06906  | 1.17923  | -0.22965 |
| C  | 4.39983  | 0.01384  | 0.16279  |
| C  | 5.08245  | 3.63039  | -0.89616 |
| S  | 2.11088  | -1.46815 | 0.75445  |
| O  | 3.13571  | -2.48045 | 1.0792   |
| O  | 1.14546  | -1.06246 | 1.80814  |

|   |          |          |          |
|---|----------|----------|----------|
| H | -1.48017 | 0.12577  | 2.14186  |
| H | -2.99035 | -0.6837  | -2.54811 |
| H | -5.28361 | 0.06456  | -3.25783 |
| H | -6.79817 | 1.19899  | -1.66104 |
| H | -6.09704 | 1.63407  | 0.69902  |
| H | -3.17014 | 1.28754  | 3.57892  |
| H | -4.84731 | 0.8383   | 3.14559  |
| H | -4.18937 | 2.43287  | 2.65638  |
| H | 1.21729  | -2.80627 | -2.40258 |
| H | 2.61807  | -3.24735 | -1.39115 |
| H | 2.57058  | -1.66223 | -2.21783 |
| H | 1.20498  | 1.20879  | 0.17529  |
| H | 2.40642  | 3.28196  | -0.51542 |
| H | 6.15692  | 1.16027  | -0.34214 |
| H | 4.94227  | -0.91214 | 0.362    |
| H | 4.95297  | 4.42639  | -0.14276 |
| H | 4.67951  | 4.02124  | -1.84581 |
| H | 6.16225  | 3.46616  | -1.0289  |

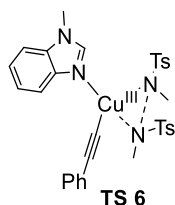

Thermal correction to Gibbs Free Energy = 0.509529

Single-point electronic energies = -4195.353388

Free Energies (298K) = -4194.843860

Charge = 0 Multiplicity = 1

|    |          |          |          |
|----|----------|----------|----------|
| Cu | -0.42297 | 0.64117  | -0.08725 |
| N  | -1.48869 | -0.95303 | 0.61269  |
| C  | 0.62665  | 2.7419   | -1.88322 |
| N  | 0.43849  | 1.43851  | -1.81637 |
| C  | 0.89806  | 0.9208   | -3.01869 |
| C  | 1.39689  | 1.98625  | -3.80844 |
| N  | 1.20211  | 3.13248  | -3.0512  |
| C  | 0.94063  | -0.39475 | -3.50069 |
| C  | 1.49433  | -0.60477 | -4.76151 |
| C  | 1.99934  | 0.46419  | -5.53507 |
| C  | 1.95801  | 1.78027  | -5.07417 |
| C  | 1.53801  | 4.48657  | -3.44753 |
| C  | -1.39521 | 2.16165  | 0.68246  |
| C  | -2.18979 | 2.86296  | 1.31288  |
| C  | -3.14441 | 3.54288  | 2.13349  |
| C  | -3.37581 | 4.93244  | 2.0303   |
| C  | -4.31759 | 5.56208  | 2.84639  |
| C  | -5.05018 | 4.82317  | 3.78211  |
| C  | -4.8314  | 3.44418  | 3.89496  |

|   |          |          |          |
|---|----------|----------|----------|
| C | -3.89212 | 2.80702  | 3.08429  |
| C | -2.5949  | -1.05916 | -0.32194 |
| N | 0.17933  | -1.45404 | -0.26805 |
| C | -0.15322 | -2.78164 | -0.75308 |
| C | 2.86415  | -1.45382 | -0.57713 |
| C | 3.3162   | -0.26193 | -1.15408 |
| C | 4.27727  | -0.32232 | -2.15883 |
| C | 4.78885  | -1.55348 | -2.60666 |
| C | 4.33209  | -2.73195 | -1.9921  |
| C | 3.37747  | -2.69252 | -0.97476 |
| C | 5.78377  | -1.5918  | -3.73585 |
| S | 1.60193  | -1.37053 | 0.68506  |
| O | 1.7572   | -2.55547 | 1.53692  |
| O | 1.59236  | -0.00452 | 1.22687  |
| S | -1.77133 | -1.29844 | 2.23044  |
| C | -2.00386 | -3.07226 | 2.33697  |
| O | -0.57156 | -0.94271 | 2.97798  |
| O | -3.07968 | -0.69285 | 2.52523  |
| C | -0.90716 | -3.88619 | 2.64071  |
| C | -1.08759 | -5.26809 | 2.68732  |
| C | -2.34362 | -5.85204 | 2.44225  |
| C | -3.42767 | -5.00632 | 2.15389  |
| C | -3.27036 | -3.61975 | 2.10702  |
| C | -2.52518 | -7.34536 | 2.52995  |
| H | 0.56321  | -1.21614 | -2.89471 |
| H | 1.54669  | -1.62044 | -5.1611  |
| H | 2.42756  | 0.25571  | -6.51867 |
| H | 2.3425   | 2.60828  | -5.67289 |
| H | 0.98958  | 4.76634  | -4.36041 |
| H | 2.61897  | 4.5743   | -3.63847 |
| H | 1.26213  | 5.17799  | -2.64084 |
| H | 0.33835  | 3.43529  | -1.09305 |
| H | -2.80473 | 5.51235  | 1.30095  |
| H | -4.48121 | 6.63954  | 2.75186  |
| H | -5.78664 | 5.31878  | 4.42055  |
| H | -5.39876 | 2.85906  | 4.62452  |
| H | -3.71641 | 1.73124  | 3.16591  |
| H | -3.32811 | -0.26605 | -0.09802 |
| H | -3.0838  | -2.04924 | -0.31079 |
| H | -2.2226  | -0.86751 | -1.33949 |
| H | -0.99346 | -2.71382 | -1.45487 |
| H | -0.39661 | -3.50019 | 0.04405  |
| H | 0.70403  | -3.17001 | -1.32938 |
| H | 2.91157  | 0.69033  | -0.81297 |
| H | 4.62841  | 0.6048   | -2.61943 |
| H | 4.7354   | -3.69701 | -2.30995 |
| H | 3.04406  | -3.60731 | -0.48161 |
| H | 6.60796  | -0.87978 | -3.56744 |
| H | 5.29736  | -1.30182 | -4.68352 |
| H | 6.21627  | -2.59405 | -3.871   |

|   |          |          |         |
|---|----------|----------|---------|
| H | 0.07087  | -3.43629 | 2.81205 |
| H | -0.23314 | -5.90887 | 2.92307 |
| H | -4.41571 | -5.43867 | 1.97327 |
| H | -4.12171 | -2.96543 | 1.91296 |
| H | -2.65985 | -7.65859 | 3.58038 |
| H | -3.4107  | -7.68317 | 1.97047 |
| H | -1.64502 | -7.8832  | 2.14382 |

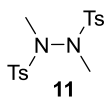

Thermal correction to Gibbs Free Energy = 0.287955

Single-point electronic energies = -1828.179014

Free Energies (298K) = -1827.891059

Charge = 0 Multiplicity = 1

|   |          |          |          |
|---|----------|----------|----------|
| N | -0.75969 | -0.49836 | 0.49669  |
| C | -1.67448 | 0.0251   | -0.51333 |
| N | 0.40296  | -1.07524 | 0.07135  |
| C | 0.76065  | -2.38056 | 0.61871  |
| C | -2.01179 | -0.56674 | 2.9329   |
| C | -3.29343 | -0.02796 | 3.05089  |
| C | -4.27001 | -0.74815 | 3.74462  |
| C | -3.97984 | -1.99164 | 4.32617  |
| C | -2.67326 | -2.50186 | 4.19898  |
| C | -1.68777 | -1.79985 | 3.51018  |
| C | -5.02308 | -2.76429 | 5.09043  |
| S | -0.7551  | 0.3342   | 2.02824  |
| O | 0.55174  | 0.0368   | 2.62002  |
| O | -1.24515 | 1.70249  | 1.84154  |
| C | 2.00206  | -0.47787 | -2.07248 |
| C | 3.06927  | -1.31095 | -2.4084  |
| C | 3.26187  | -1.65816 | -3.74879 |
| C | 2.40738  | -1.17941 | -4.75316 |
| C | 1.34517  | -0.33205 | -4.38146 |
| C | 1.13727  | 0.02415  | -3.05188 |
| C | 2.61587  | -1.53946 | -6.20113 |
| S | 1.73257  | -0.03404 | -0.35743 |
| O | 2.92553  | -0.43404 | 0.39368  |
| O | 1.18637  | 1.3245   | -0.30718 |
| H | -2.67164 | 0.1552   | -0.06785 |
| H | -1.7489  | -0.72017 | -1.31742 |
| H | -1.33755 | 0.99147  | -0.92074 |
| H | -0.14278 | -3.00612 | 0.61079  |
| H | 1.16347  | -2.30816 | 1.64137  |
| H | 1.5151   | -2.85206 | -0.02793 |
| H | -3.51595 | 0.94718  | 2.61438  |
| H | -5.27555 | -0.32975 | 3.83978  |
| H | -2.42638 | -3.4646  | 4.65538  |



|   |          |          |          |
|---|----------|----------|----------|
| H | -0.67388 | -2.19548 | 3.4264   |
| H | -5.07609 | -3.81015 | 4.74617  |
| H | -6.02267 | -2.31737 | 4.98588  |
| H | -4.77778 | -2.79316 | 6.1661   |
| H | 3.74385  | -1.6708  | -1.62968 |
| H | 4.09771  | -2.3098  | -4.01702 |
| H | 0.67525  | 0.05834  | -5.15283 |
| H | 0.31945  | 0.69077  | -2.77214 |
| H | 3.42854  | -2.26933 | -6.32981 |
| H | 2.86782  | -0.64419 | -6.79488 |
| H | 1.69889  | -1.96644 | -6.64013 |

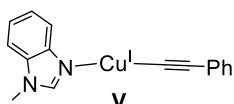

Thermal correction to Gibbs Free Energy = 0.199831

Single-point electronic energies = -2367.258328

Free Energies (298K) = -2367.058495

Charge = 0 Multiplicity = 1

|    |          |          |          |
|----|----------|----------|----------|
| Cu | -0.0646  | -0.38844 | -0.00009 |
| C  | -2.71831 | -1.67197 | -0.00011 |
| N  | -1.98958 | -0.56974 | -0.00015 |
| C  | -2.89193 | 0.48751  | -0.00009 |
| C  | -4.20341 | -0.03842 | -0.00001 |
| N  | -4.05208 | -1.41759 | -0.00004 |
| C  | -2.6748  | 1.87179  | -0.00005 |
| C  | -3.79731 | 2.6957   | 0.00008  |
| C  | -5.10596 | 2.16093  | 0.00017  |
| C  | -5.33528 | 0.78568  | 0.00013  |
| C  | -5.12802 | -2.39063 | 0.00008  |
| C  | 1.784    | -0.20901 | 0.00005  |
| C  | 3.01299  | -0.10566 | 0.00004  |
| C  | 4.43922  | 0.00827  | 0.00004  |
| C  | 5.16627  | 0.06422  | 1.21206  |
| C  | 6.55744  | 0.17156  | 1.20844  |
| C  | 7.2617   | 0.22569  | 0.00004  |
| C  | 6.55742  | 0.17183  | -1.20837 |
| C  | 5.16626  | 0.06449  | -1.21199 |
| H  | -2.32082 | -2.6855  | -0.00013 |
| H  | -1.65729 | 2.26854  | -0.0001  |
| H  | -3.66686 | 3.78047  | 0.00012  |
| H  | -5.95912 | 2.84378  | 0.00027  |
| H  | -6.34626 | 0.37409  | 0.00021  |
| H  | -5.75493 | -2.26671 | 0.89648  |
| H  | -4.70425 | -3.40329 | -0.00031 |
| H  | -5.75549 | -2.26628 | -0.89587 |
| H  | 4.62024  | 0.02159  | 2.1574   |
| H  | 7.09804  | 0.21293  | 2.15833  |

|   |         |         |          |
|---|---------|---------|----------|
| H | 8.35176 | 0.30921 | 0.00004  |
| H | 7.098   | 0.21341 | -2.15827 |
| H | 4.62021 | 0.02207 | -2.15733 |

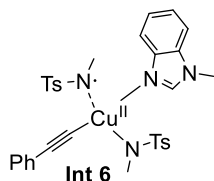

Thermal correction to Gibbs Free Energy = 0.512558

Single-point electronic energies = -4195.409298

Free Energies (298K) = -4194.896742

Charge = 0 Multiplicity = 3

|    |          |          |          |
|----|----------|----------|----------|
| Cu | -1.28952 | 0.20595  | -0.7909  |
| N  | -1.75973 | 2.15144  | -1.11286 |
| C  | -4.17807 | 0.51849  | -0.89509 |
| N  | -3.23414 | -0.34998 | -0.57132 |
| C  | -3.89616 | -1.48643 | -0.10905 |
| C  | -5.29078 | -1.24811 | -0.18804 |
| N  | -5.42457 | 0.03826  | -0.69143 |
| C  | -3.42864 | -2.70926 | 0.39156  |
| C  | -4.37462 | -3.6569  | 0.7804   |
| C  | -5.76017 | -3.41011 | 0.68299  |
| C  | -6.24391 | -2.19512 | 0.19931  |
| C  | -6.67193 | 0.74367  | -0.91163 |
| C  | 0.59542  | 0.35753  | -1.27596 |
| C  | 1.81587  | 0.42762  | -1.48592 |
| C  | 3.21694  | 0.55817  | -1.66829 |
| C  | 3.91304  | -0.23516 | -2.60975 |
| C  | 5.29605  | -0.12249 | -2.74023 |
| C  | 6.00934  | 0.78732  | -1.94868 |
| C  | 5.32952  | 1.58725  | -1.0204  |
| C  | 3.94905  | 1.47532  | -0.87526 |
| C  | -1.07165 | 2.81852  | -2.21527 |
| N  | -0.32403 | -1.69561 | -0.48533 |
| C  | -0.18689 | -2.60257 | -1.60378 |
| C  | 2.06808  | -2.42566 | 0.80028  |
| C  | 2.57811  | -3.66803 | 0.41359  |
| C  | 3.95929  | -3.8141  | 0.26603  |
| C  | 4.83256  | -2.74235 | 0.51041  |
| C  | 4.28603  | -1.50894 | 0.91036  |
| C  | 2.91205  | -1.33931 | 1.05386  |
| C  | 6.32252  | -2.88714 | 0.3453   |
| S  | 0.30618  | -2.22489 | 1.00269  |
| O  | -0.26863 | -3.56589 | 1.22847  |
| O  | 0.05794  | -1.14262 | 1.95759  |
| S  | -1.91758 | 3.05265  | 0.25021  |
| C  | -0.29689 | 3.08313  | 1.04058  |

|   |          |          |          |
|---|----------|----------|----------|
| O | -2.24354 | 4.4485   | -0.10793 |
| O | -2.81523 | 2.31615  | 1.16065  |
| C | 0.60043  | 4.11706  | 0.76414  |
| C | 1.88702  | 4.06949  | 1.30944  |
| C | 2.28727  | 3.00671  | 2.13592  |
| C | 1.35938  | 1.98464  | 2.40428  |
| C | 0.0764   | 2.01426  | 1.86094  |
| H | -2.3676  | -2.91329 | 0.50385  |
| H | -4.02907 | -4.61331 | 1.18043  |
| H | -6.46655 | -4.18103 | 1.00072  |
| H | -7.31395 | -1.98976 | 0.13047  |
| H | -6.45546 | 1.74561  | -1.30413 |
| H | -7.22479 | 0.84497  | 0.03501  |
| H | -7.29765 | 0.20052  | -1.63678 |
| H | -3.95768 | 1.52148  | -1.25325 |
| H | 3.35484  | -0.94573 | -3.22301 |
| H | 5.82429  | -0.74677 | -3.46545 |
| H | 7.09339  | 0.87489  | -2.05792 |
| H | 5.88197  | 2.3013   | -0.40405 |
| H | 3.4118   | 2.0885   | -0.15028 |
| H | -0.01141 | 3.05398  | -2.00131 |
| H | -1.58632 | 3.75393  | -2.49107 |
| H | -1.08552 | 2.14361  | -3.08402 |
| H | 0.85414  | -2.93173 | -1.76986 |
| H | -0.54213 | -2.0864  | -2.50697 |
| H | -0.8112  | -3.4994  | -1.43886 |
| H | 1.90329  | -4.50963 | 0.2496   |
| H | 4.36496  | -4.78271 | -0.03765 |
| H | 4.95144  | -0.66226 | 1.09423  |
| H | 2.48825  | -0.37816 | 1.34475  |
| H | 6.84711  | -2.67365 | 1.29179  |
| H | 6.70209  | -2.16909 | -0.40052 |
| H | 6.60424  | -3.89961 | 0.02084  |
| H | 0.28448  | 4.95134  | 0.13537  |
| H | 2.59262  | 4.87583  | 1.08924  |
| H | 1.64224  | 1.14461  | 3.04404  |
| H | -0.62382 | 1.20337  | 2.06353  |
| C | 3.67107  | 2.96163  | 2.73431  |
| H | 4.37489  | 3.60748  | 2.18681  |
| H | 3.65833  | 3.30485  | 3.78378  |
| H | 4.07604  | 1.93685  | 2.73873  |

Int 7<sup>MECP</sup>

Single-point electronic energies = -4195.401722

Charge = 0 Multiplicity = 3

|    |          |         |          |
|----|----------|---------|----------|
| Cu | -1.1967  | 0.06615 | -0.83696 |
| N  | -1.60538 | 2.03652 | -1.02548 |
| C  | -4.08298 | 0.46537 | -0.94317 |

|   |          |          |          |
|---|----------|----------|----------|
| N | -3.18776 | -0.4623  | -0.65881 |
| C | -3.9125  | -1.55856 | -0.18951 |
| C | -5.29098 | -1.23297 | -0.22883 |
| N | -5.35615 | 0.06506  | -0.7151  |
| C | -3.51404 | -2.81396 | 0.29291  |
| C | -4.50871 | -3.70259 | 0.69885  |
| C | -5.87667 | -3.36807 | 0.63856  |
| C | -6.29244 | -2.12056 | 0.17643  |
| C | -6.55446 | 0.86257  | -0.88211 |
| C | 0.66782  | 0.20338  | -1.41585 |
| C | 1.87093  | 0.32351  | -1.69818 |
| C | 3.24732  | 0.54321  | -1.97875 |
| C | 3.89697  | -0.10525 | -3.05568 |
| C | 5.25048  | 0.11595  | -3.30367 |
| C | 5.98281  | 0.99426  | -2.49537 |
| C | 5.35066  | 1.65495  | -1.43439 |
| C | 4.00053  | 1.4322   | -1.17213 |
| C | -0.97129 | 2.8208   | -2.0831  |
| N | -0.28431 | -1.89492 | -0.6421  |
| C | -0.10558 | -2.82316 | -1.73653 |
| C | 2.02088  | -2.63799 | 0.81116  |
| C | 2.52696  | -3.91681 | 0.56412  |
| C | 3.91144  | -4.09952 | 0.51213  |
| C | 4.79383  | -3.02652 | 0.71155  |
| C | 4.25153  | -1.7556  | 0.97843  |
| C | 2.87537  | -1.5514  | 1.029    |
| C | 6.28883  | -3.21439 | 0.64348  |
| S | 0.2528   | -2.38556 | 0.89316  |
| O | -0.36672 | -3.70095 | 1.13793  |
| O | -0.01955 | -1.24821 | 1.77323  |
| S | -1.85996 | 2.8376   | 0.38832  |
| C | -0.26321 | 3.09468  | 1.19365  |
| O | -2.39971 | 4.17973  | 0.0981   |
| O | -2.61637 | 1.9205   | 1.25949  |
| C | 0.44273  | 4.28442  | 0.99834  |
| C | 1.69621  | 4.44585  | 1.59716  |
| C | 2.25348  | 3.43864  | 2.40142  |
| C | 1.514    | 2.25781  | 2.59225  |
| C | 0.26582  | 2.07816  | 1.99616  |
| H | -2.46511 | -3.0867  | 0.38799  |
| H | -4.21474 | -4.68136 | 1.08559  |
| H | -6.62348 | -4.09341 | 0.97014  |
| H | -7.34995 | -1.85001 | 0.13954  |
| H | -6.2784  | 1.84866  | -1.27808 |
| H | -7.06266 | 1.00117  | 0.08524  |
| H | -7.24993 | 0.37633  | -1.58458 |
| H | -3.81751 | 1.46129  | -1.29346 |
| H | 3.32283  | -0.7848  | -3.68877 |
| H | 5.73896  | -0.39464 | -4.1376  |
| H | 7.04259  | 1.16978  | -2.69627 |

|   |          |          |          |
|---|----------|----------|----------|
| H | 5.91536  | 2.35262  | -0.81053 |
| H | 3.50046  | 1.94842  | -0.34995 |
| H | 0.08447  | 3.08194  | -1.87673 |
| H | -1.53055 | 3.75546  | -2.25513 |
| H | -0.98564 | 2.23328  | -3.01321 |
| H | 0.92912  | -3.19949 | -1.82546 |
| H | -0.37417 | -2.31199 | -2.67177 |
| H | -0.77584 | -3.69256 | -1.60405 |
| H | 1.84304  | -4.75723 | 0.43462  |
| H | 4.31185  | -5.09814 | 0.3185   |
| H | 4.92243  | -0.90795 | 1.14132  |
| H | 2.45732  | -0.5643  | 1.23091  |
| H | 6.76536  | -2.95856 | 1.60452  |
| H | 6.73229  | -2.55404 | -0.12003 |
| H | 6.55954  | -4.2509  | 0.39653  |
| H | 0.00078  | 5.08009  | 0.39569  |
| H | 2.24658  | 5.37881  | 1.44369  |
| H | 1.91613  | 1.46314  | 3.22806  |
| H | -0.29298 | 1.15471  | 2.15464  |
| C | 3.59196  | 3.62382  | 3.07513  |
| H | 4.21567  | 4.36083  | 2.54643  |
| H | 3.46886  | 3.9823   | 4.11239  |
| H | 4.14951  | 2.67513  | 3.12883  |

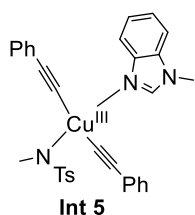

Thermal correction to Gibbs Free Energy = 0.444945

Single-point electronic energies = -3588.968456

Free Energies (298K) = -3588.968456

Charge = 0 Multiplicity = 1

|    |          |          |          |
|----|----------|----------|----------|
| Cu | 0.56951  | 0.49476  | -0.35805 |
| C  | 2.31587  | -0.22002 | -0.41306 |
| C  | 3.39436  | -0.79762 | -0.40363 |
| C  | 4.59098  | -1.58295 | -0.36538 |
| C  | 4.49127  | -2.96524 | -0.08838 |
| C  | 5.64041  | -3.75488 | -0.04192 |
| C  | 6.90022  | -3.18811 | -0.27051 |
| C  | 7.00703  | -1.82024 | -0.54651 |
| C  | 5.86398  | -1.02034 | -0.59352 |
| N  | -0.06265 | -1.24396 | -0.8656  |
| C  | 0.26889  | -1.72749 | -2.19258 |
| C  | -1.53972 | -3.07552 | 0.38902  |
| C  | -2.66162 | -2.26969 | 0.62353  |
| C  | -3.9247  | -2.85202 | 0.60364  |

|   |          |          |          |
|---|----------|----------|----------|
| C | -4.09001 | -4.22943 | 0.35492  |
| C | -2.9468  | -5.0087  | 0.12493  |
| C | -1.66832 | -4.44033 | 0.13804  |
| C | -5.4707  | -4.83301 | 0.33831  |
| S | 0.08304  | -2.30921 | 0.40839  |
| O | 0.18366  | -1.47685 | 1.62046  |
| O | 1.06911  | -3.37784 | 0.16057  |
| C | 2.07466  | 2.37463  | 1.24885  |
| N | 1.23841  | 2.23344  | 0.2338   |
| C | 0.92512  | 3.50701  | -0.22078 |
| C | 1.62626  | 4.43232  | 0.5863   |
| N | 2.33852  | 3.67414  | 1.50794  |
| C | 0.10426  | 3.94847  | -1.26631 |
| C | 0.01225  | 5.32292  | -1.46891 |
| C | 0.71371  | 6.24162  | -0.65627 |
| C | 1.53356  | 5.81431  | 0.38649  |
| C | 3.21117  | 4.19446  | 2.54519  |
| C | -1.24898 | 1.08037  | -0.34095 |
| C | -2.45034 | 1.31811  | -0.28963 |
| C | -3.8585  | 1.55925  | -0.21017 |
| C | -4.57996 | 1.20741  | 0.95307  |
| C | -5.95718 | 1.4204   | 1.02686  |
| C | -6.6445  | 1.98961  | -0.05134 |
| C | -5.94059 | 2.34568  | -1.20724 |
| C | -4.5636  | 2.13478  | -1.28969 |
| H | 3.50063  | -3.39158 | 0.08741  |
| H | 5.55241  | -4.8231  | 0.17428  |
| H | 7.79768  | -3.81145 | -0.23401 |
| H | 7.98867  | -1.37359 | -0.72683 |
| H | 5.94558  | 0.04755  | -0.80998 |
| H | -0.37526 | -2.59213 | -2.43695 |
| H | 1.32502  | -2.02179 | -2.31087 |
| H | 0.03164  | -0.9298  | -2.91243 |
| H | -2.53662 | -1.20039 | 0.80068  |
| H | -4.80439 | -2.22569 | 0.77765  |
| H | -3.05377 | -6.07937 | -0.06973 |
| H | -0.77698 | -5.04346 | -0.04232 |
| H | -6.10953 | -4.33752 | -0.41212 |
| H | -5.96884 | -4.70614 | 1.31457  |
| H | -5.44626 | -5.90843 | 0.10787  |
| H | -0.44354 | 3.23171  | -1.87818 |
| H | -0.62139 | 5.70248  | -2.27395 |
| H | 0.61023  | 7.31194  | -0.85013 |
| H | 2.07689  | 6.52128  | 1.01606  |
| H | 3.63393  | 3.35865  | 3.1173   |
| H | 2.64308  | 4.84497  | 3.22732  |
| H | 4.03236  | 4.77286  | 2.09526  |
| H | 2.51555  | 1.54687  | 1.80055  |
| H | -4.04532 | 0.76505  | 1.79689  |
| H | -6.49837 | 1.14103  | 1.93502  |

|   |          |         |          |
|---|----------|---------|----------|
| H | -7.72319 | 2.15574 | 0.00925  |
| H | -6.46979 | 2.79131 | -2.05399 |
| H | -4.01757 | 2.40998 | -2.19494 |

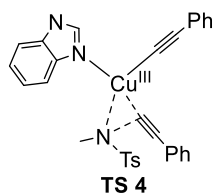

Thermal correction to Gibbs Free Energy = 0.445780

Single-point electronic energies = -3588.960726

Free Energies (298K) = -3588.514945

Charge = 0 Multiplicity = 1

|    |          |          |          |
|----|----------|----------|----------|
| Cu | -0.56403 | -1.0685  | 0.29249  |
| C  | 1.02933  | -0.04101 | 0.12744  |
| C  | 2.07327  | 0.60078  | 0.04906  |
| C  | 3.27709  | 1.36974  | -0.05154 |
| C  | 3.25983  | 2.67544  | -0.59168 |
| C  | 4.43534  | 3.42062  | -0.69127 |
| C  | 5.65201  | 2.88416  | -0.25439 |
| C  | 5.68343  | 1.59287  | 0.28463  |
| C  | 4.51209  | 0.84137  | 0.38628  |
| N  | -1.78733 | -2.50949 | 0.78878  |
| C  | -2.19538 | -3.48962 | -0.21473 |
| C  | -3.91516 | -2.4785  | 2.45318  |
| C  | -4.28557 | -1.18982 | 2.85049  |
| C  | -5.63765 | -0.84464 | 2.85551  |
| C  | -6.62767 | -1.76932 | 2.47626  |
| C  | -6.2242  | -3.06277 | 2.10077  |
| C  | -4.87728 | -3.42796 | 2.09495  |
| C  | -8.08744 | -1.39903 | 2.51328  |
| S  | -2.17225 | -2.90318 | 2.40539  |
| O  | -1.45381 | -1.95891 | 3.26214  |
| O  | -2.0728  | -4.35495 | 2.61313  |
| C  | -3.2429  | 0.08427  | -0.31767 |
| N  | -1.96181 | 0.13917  | -0.62817 |
| C  | -1.83462 | 1.15819  | -1.56589 |
| C  | -3.11552 | 1.71483  | -1.79757 |
| N  | -3.98619 | 1.00354  | -0.98186 |
| C  | -0.71454 | 1.64482  | -2.25518 |
| C  | -0.91912 | 2.68867  | -3.1548  |
| C  | -2.20104 | 3.24179  | -3.37274 |
| C  | -3.3248  | 2.76428  | -2.69993 |
| C  | -5.41607 | 1.21572  | -0.86321 |
| C  | 0.17222  | -2.68093 | 0.88667  |
| C  | 0.86433  | -3.64479 | 1.19551  |
| C  | 1.65294  | -4.75969 | 1.61127  |

|   |          |          |          |
|---|----------|----------|----------|
| C | 1.18848  | -5.57851 | 2.66607  |
| C | 1.9447   | -6.67028 | 3.09206  |
| C | 3.16392  | -6.97262 | 2.47355  |
| C | 3.6276   | -6.17127 | 1.42372  |
| C | 2.88479  | -5.07021 | 0.99603  |
| H | 0.27032  | 1.21504  | -2.07279 |
| H | -0.06634 | 3.09166  | -3.70665 |
| H | 2.30983  | 3.09736  | -0.92823 |
| H | 4.40211  | 4.42982  | -1.11116 |
| H | 6.57145  | 3.4705   | -0.33199 |
| H | 6.62966  | 1.16731  | 0.63002  |
| H | 4.53623  | -0.16591 | 0.80819  |
| H | -3.29606 | -3.56759 | -0.23805 |
| H | -1.76189 | -4.48516 | -0.0294  |
| H | -1.86242 | -3.1287  | -1.19755 |
| H | -3.5194  | -0.47398 | 3.15372  |
| H | -5.93121 | 0.16102  | 3.1691   |
| H | -6.97946 | -3.80078 | 1.81703  |
| H | -4.57119 | -4.44083 | 1.82797  |
| H | -8.53519 | -1.68955 | 3.47996  |
| H | -8.65706 | -1.91489 | 1.7248   |
| H | -8.23661 | -0.31462 | 2.39799  |
| H | -2.31415 | 4.06129  | -4.08686 |
| H | -4.31722 | 3.18639  | -2.86932 |
| H | -5.82789 | 0.506    | -0.13357 |
| H | -5.90991 | 1.05818  | -1.83461 |
| H | -5.623   | 2.24111  | -0.51975 |
| H | -3.67045 | -0.61847 | 0.3943   |
| H | 0.22649  | -5.34292 | 3.1263   |
| H | 1.5768   | -7.29472 | 3.91084  |
| H | 3.75174  | -7.8312  | 2.80907  |
| H | 4.57969  | -6.40262 | 0.93836  |
| H | 3.24971  | -4.43657 | 0.1845   |

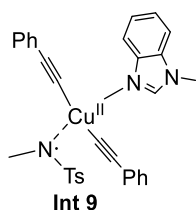

Thermal correction to Gibbs Free Energy = 0.441377

Single-point electronic energies = -3588.951181

Free Energies (298K) = -3588.509803

Charge = 0 Multiplicity = 3

|    |         |          |          |
|----|---------|----------|----------|
| Cu | 0.55827 | 0.71329  | -0.77643 |
| C  | 2.51384 | 0.36636  | -0.8541  |
| C  | 3.62257 | -0.18679 | -0.79273 |
| C  | 4.87906 | -0.85164 | -0.67826 |



|   |          |          |          |
|---|----------|----------|----------|
| C | 5.04954  | -1.8658  | 0.29401  |
| C | 6.27219  | -2.52519 | 0.41309  |
| C | 7.34486  | -2.18698 | -0.42097 |
| C | 7.18571  | -1.18703 | -1.388   |
| C | 5.96493  | -0.52649 | -1.52274 |
| N | 0.82551  | -1.34531 | -0.66943 |
| C | 0.87015  | -2.21518 | -1.8164  |
| C | -0.68362 | -2.69308 | 1.08946  |
| C | -1.68163 | -1.80294 | 1.50589  |
| C | -2.9892  | -2.26601 | 1.6119   |
| C | -3.31817 | -3.60026 | 1.30671  |
| C | -2.2928  | -4.46919 | 0.89742  |
| C | -0.97381 | -4.02522 | 0.78289  |
| C | -4.74789 | -4.05949 | 1.40618  |
| S | 0.97538  | -2.07749 | 0.87335  |
| O | 1.21171  | -0.9899  | 1.82582  |
| O | 1.90441  | -3.21585 | 0.78902  |
| C | 1.64712  | 3.03322  | 0.7079   |
| N | 0.6554   | 2.6659   | -0.08166 |
| C | -0.24736 | 3.7218   | -0.0902  |
| C | 0.26149  | 4.74884  | 0.74162  |
| N | 1.46854  | 4.27141  | 1.23253  |
| C | -1.4698  | 3.89284  | -0.75614 |
| C | -2.14816 | 5.0936   | -0.55714 |
| C | -1.63293 | 6.10887  | 0.27942  |
| C | -0.41668 | 5.95636  | 0.94371  |
| C | 2.3595   | 4.97549  | 2.13427  |
| C | -1.36677 | 0.54057  | -1.01826 |
| C | -2.5678  | 0.27598  | -1.06036 |
| C | -3.95861 | -0.05724 | -1.06343 |
| C | -4.92437 | 0.8397   | -0.55336 |
| C | -6.27581 | 0.49217  | -0.52628 |
| C | -6.69741 | -0.75208 | -1.00945 |
| C | -5.7521  | -1.6499  | -1.52004 |
| C | -4.39864 | -1.31085 | -1.5455  |
| H | 4.20286  | -2.1416  | 0.92516  |
| H | 6.38855  | -3.31243 | 1.16271  |
| H | 8.30235  | -2.70491 | -0.32078 |
| H | 8.01944  | -0.92255 | -2.04395 |
| H | 5.83725  | 0.25166  | -2.27873 |
| H | -0.07741 | -2.78336 | -1.89178 |
| H | 1.70527  | -2.93261 | -1.75921 |
| H | 0.96875  | -1.59134 | -2.71551 |
| H | -1.43452 | -0.76401 | 1.72461  |
| H | -3.77782 | -1.5762  | 1.92199  |
| H | -2.52933 | -5.51056 | 0.6636   |
| H | -0.17536 | -4.70043 | 0.47005  |
| H | -5.38841 | -3.46574 | 0.73266  |
| H | -5.13837 | -3.91597 | 2.42757  |
| H | -4.86012 | -5.12159 | 1.14301  |

|   |          |          |          |
|---|----------|----------|----------|
| H | -1.86392 | 3.1005   | -1.39218 |
| H | -3.10425 | 5.2559   | -1.06118 |
| H | -2.19947 | 7.03465  | 0.40733  |
| H | -0.01391 | 6.73941  | 1.58911  |
| H | 3.23073  | 4.34385  | 2.35121  |
| H | 1.84288  | 5.20696  | 3.07865  |
| H | 2.70471  | 5.91517  | 1.67571  |
| H | 2.51857  | 2.41533  | 0.92017  |
| H | -4.59645 | 1.81024  | -0.17349 |
| H | -7.0076  | 1.19902  | -0.12547 |
| H | -7.75695 | -1.02024 | -0.9892  |
| H | -6.07235 | -2.62356 | -1.90102 |
| H | -3.66047 | -2.016   | -1.93354 |

Int 10<sup>MECP</sup>

Single-point electronic energies = -3588.947741

Charge = 0 Multiplicity = 3

|    |          |          |          |
|----|----------|----------|----------|
| Cu | 0.45377  | 0.60499  | -0.63157 |
| C  | 2.36882  | 0.24863  | -0.73269 |
| C  | 3.51882  | -0.20336 | -0.73217 |
| C  | 4.84094  | -0.73915 | -0.67499 |
| C  | 5.13085  | -1.78129 | 0.2373   |
| C  | 6.41596  | -2.31761 | 0.30444  |
| C  | 7.43243  | -1.82959 | -0.52506 |
| C  | 7.1558   | -0.80014 | -1.43181 |
| C  | 5.87269  | -0.25975 | -1.51245 |
| N  | 0.54257  | -1.40189 | -0.61223 |
| C  | 0.70601  | -2.28481 | -1.74129 |
| C  | -0.80737 | -2.82697 | 1.23875  |
| C  | -1.93022 | -2.04235 | 1.53296  |
| C  | -3.16248 | -2.66639 | 1.69985  |
| C  | -3.29748 | -4.06214 | 1.5801   |
| C  | -2.15053 | -4.82297 | 1.30491  |
| C  | -0.90342 | -4.21599 | 1.12998  |
| C  | -4.6519  | -4.705   | 1.74282  |
| S  | 0.75937  | -2.00949 | 0.95148  |
| O  | 0.82916  | -0.82653 | 1.81705  |
| O  | 1.81872  | -3.03003 | 0.96887  |
| C  | 1.65274  | 2.85953  | 0.83039  |
| N  | 0.65579  | 2.54338  | 0.02858  |
| C  | -0.13449 | 3.68266  | -0.08078 |
| C  | 0.45029  | 4.70614  | 0.70342  |
| N  | 1.58618  | 4.14293  | 1.27224  |
| C  | -1.31084 | 3.93246  | -0.80286 |
| C  | -1.86373 | 5.20773  | -0.71066 |
| C  | -1.27277 | 6.21963  | 0.07619  |
| C  | -0.10371 | 5.98792  | 0.79848  |

|   |          |          |          |
|---|----------|----------|----------|
| C | 2.52008  | 4.80431  | 2.16195  |
| C | -1.47092 | 0.59239  | -0.92989 |
| C | -2.68165 | 0.40393  | -1.04426 |
| C | -4.08659 | 0.1643   | -1.18159 |
| C | -5.04023 | 0.99401  | -0.54863 |
| C | -6.40611 | 0.73922  | -0.67684 |
| C | -6.85655 | -0.34505 | -1.43797 |
| C | -5.92535 | -1.17578 | -2.07079 |
| C | -4.55853 | -0.92721 | -1.94599 |
| H | 4.32568  | -2.16864 | 0.86584  |
| H | 6.62622  | -3.12617 | 1.00946  |
| H | 8.4381   | -2.25418 | -0.46819 |
| H | 7.94675  | -0.4173  | -2.08229 |
| H | 5.65234  | 0.54147  | -2.2212  |
| H | -0.12958 | -3.01092 | -1.78443 |
| H | 1.65586  | -2.84329 | -1.69818 |
| H | 0.67727  | -1.68368 | -2.66055 |
| H | -1.83561 | -0.95932 | 1.61266  |
| H | -4.043   | -2.05523 | 1.91514  |
| H | -2.23241 | -5.9103  | 1.22325  |
| H | -0.00938 | -4.80692 | 0.92258  |
| H | -5.3761  | -4.27848 | 1.02878  |
| H | -5.0567  | -4.52546 | 2.75307  |
| H | -4.61301 | -5.79157 | 1.58119  |
| H | -1.7691  | 3.14137  | -1.39633 |
| H | -2.78127 | 5.4325   | -1.25989 |
| H | -1.74183 | 7.20545  | 0.11999  |
| H | 0.3532   | 6.77129  | 1.4064   |
| H | 3.31354  | 4.09985  | 2.44269  |
| H | 2.01008  | 5.14526  | 3.07666  |
| H | 2.97811  | 5.67485  | 1.66622  |
| H | 2.45242  | 2.17438  | 1.1111   |
| H | -4.69122 | 1.84071  | 0.04688  |
| H | -7.12783 | 1.39285  | -0.17903 |
| H | -7.9273  | -0.54097 | -1.53832 |
| H | -6.26768 | -2.02539 | -2.66815 |
| H | -3.83236 | -1.57673 | -2.43882 |

#### 4. Kinetic Studies of The Copper-catalyzed CDC Reaction

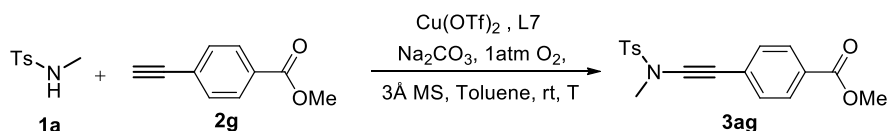

Following the general procedure, nine parallel CDC reactions of amide **1a** and terminal alkyne **2g** were performed. These reactions were quenched and worked up every 2 hours from 2h to 18h. The variations in substrate and product concentrations were monitored via integrating  $^1\text{H-NMR}$  resonances of amide  $\text{N-CH}_3$  ( $\delta$  2.63 ppm, 3H), alkyne  $\text{C}_{\text{sp}}\text{-H}$  ( $\delta$  3.26 ppm, 1H) and ynamide  $\text{N-CH}_3$  ( $\delta$  3.17 ppm, 3H) with respect to the 1,3,5-Trimethoxybenzene  $\text{Ph-H}$  (0.5 eq of **2g**,  $\delta$  6.08 ppm, 3H) internal standard (Table S5). The data were plotted in Origin 2015pro. Plots of [amide], [alkyne] and

[ynamide] versus time gave three straight lines which indicates that the reaction rate is independent of [amide] and [alkyne] under the general procedure as shown in Figure S8.

**Table S5.** Concentrations of substrates and products in the CDC reaction with time

| Entry | time | terminal alkyne<br>(mol/L) | Amide<br>(mol/L) | Ynamide<br>(mol/L) |
|-------|------|----------------------------|------------------|--------------------|
| 1     | 2    | 0.153                      | 0.708            | 0.018              |
| 2     | 4    | 0.125                      | 0.680            | 0.053              |
| 3     | 6    | 0.105                      | 0.645            | 0.083              |
| 4     | 8    | 0.063                      | 0.625            | 0.105              |
| 5     | 10   | 0.040                      | 0.615            | 0.110              |
| 6     | 12   | 0.030                      | 0.603            | 0.133              |
| 7     | 14   | 0.020                      | 0.565            | 0.145              |
| 8     | 16   | 0.019                      | 0.545            | 0.155              |
| 9     | 18   | 0.017                      | 0.513            | 0.175              |

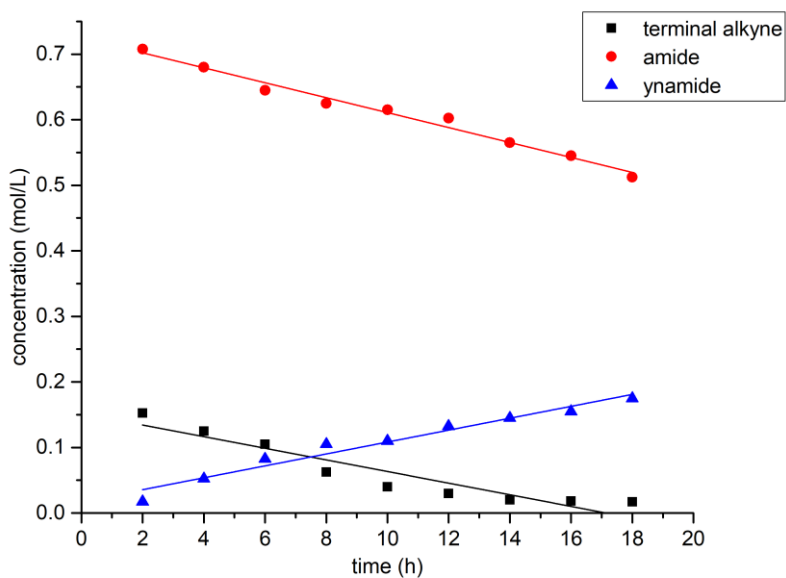

**Figure S8.** Concentrations of substrates and product as a function of time (h) for the CDC reaction to determine the reaction order in [amide] and [alkyne] under the general procedure

### Effect of different dosage of 3Å molecular sieves on the CDC reaction

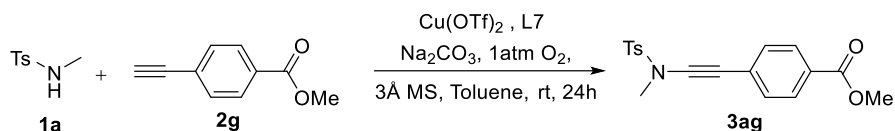

Following the general procedure, different 3Å molecular sieves loadings were employed from 60mg to 180mg. The yields of ynamide were listed in Table S6 and  $k_{\text{obs}}$  were obtained. Plot of  $k_{\text{obs}}$  vs dosage of 3Å molecular sieves gave a straight line, which suggested an apparent first-order reaction rate in 3Å MS (Figure S9).

**Table S6.** Effect of different dosage of 3Å molecular sieves on the CDC reaction

| Entry | 3Å MS (mg) | Yield (%) | M (mol/L) | $K_{\text{obs}}$ ( $\text{M h}^{-1}$ )* $10^{-3}$ |
|-------|------------|-----------|-----------|---------------------------------------------------|
| 1     | 60         | 0.31      | 0.078     | 3.229                                             |
| 2     | 90         | 0.43      | 0.108     | 4.479                                             |
| 3     | 120        | 0.56      | 0.140     | 5.833                                             |
| 4     | 150        | 0.70      | 0.175     | 7.292                                             |
| 5     | 180        | 0.87      | 0.218     | 9.063                                             |

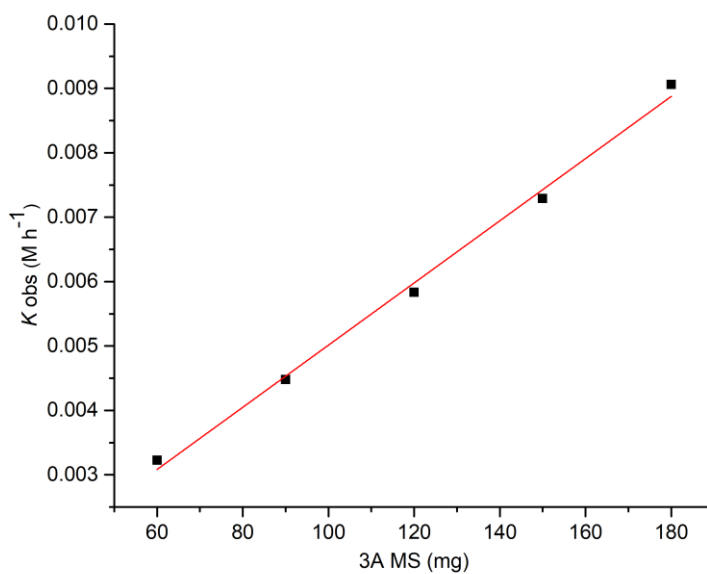

**Figure S9.** The apparent first-order reaction rate in 3Å MS

## 5. $^1\text{H}$ and $^{13}\text{C}$ NMR spectra

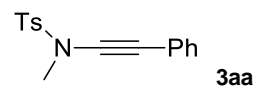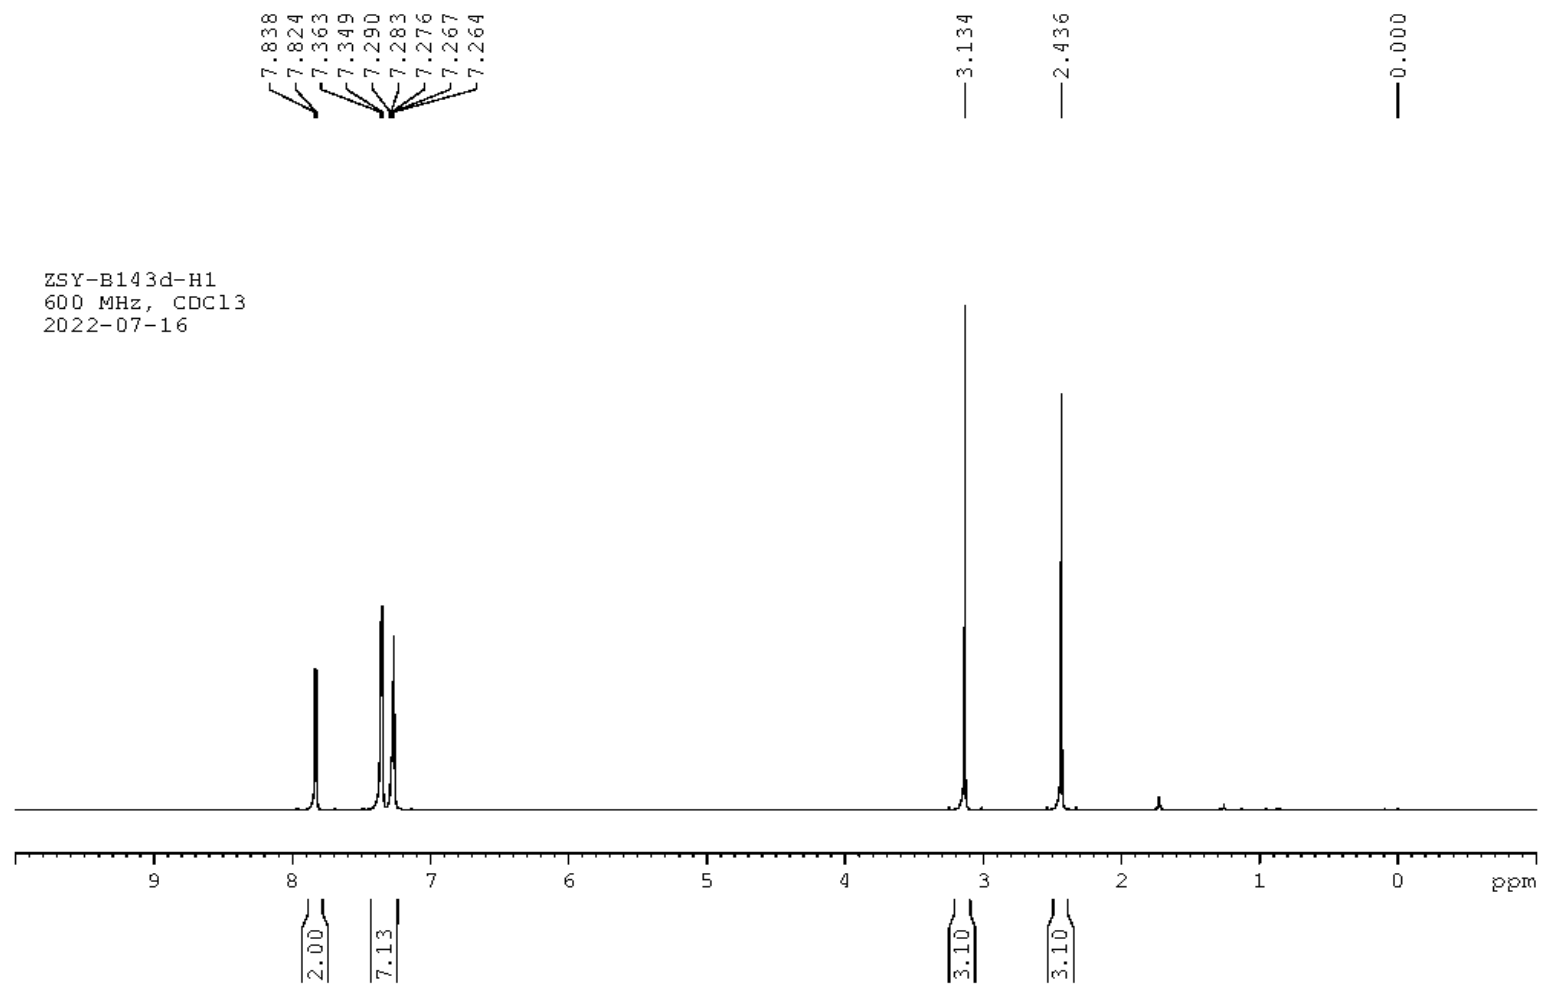

ZSY-B143d-C13  
150 MHz, CDCl3  
2022-07-16

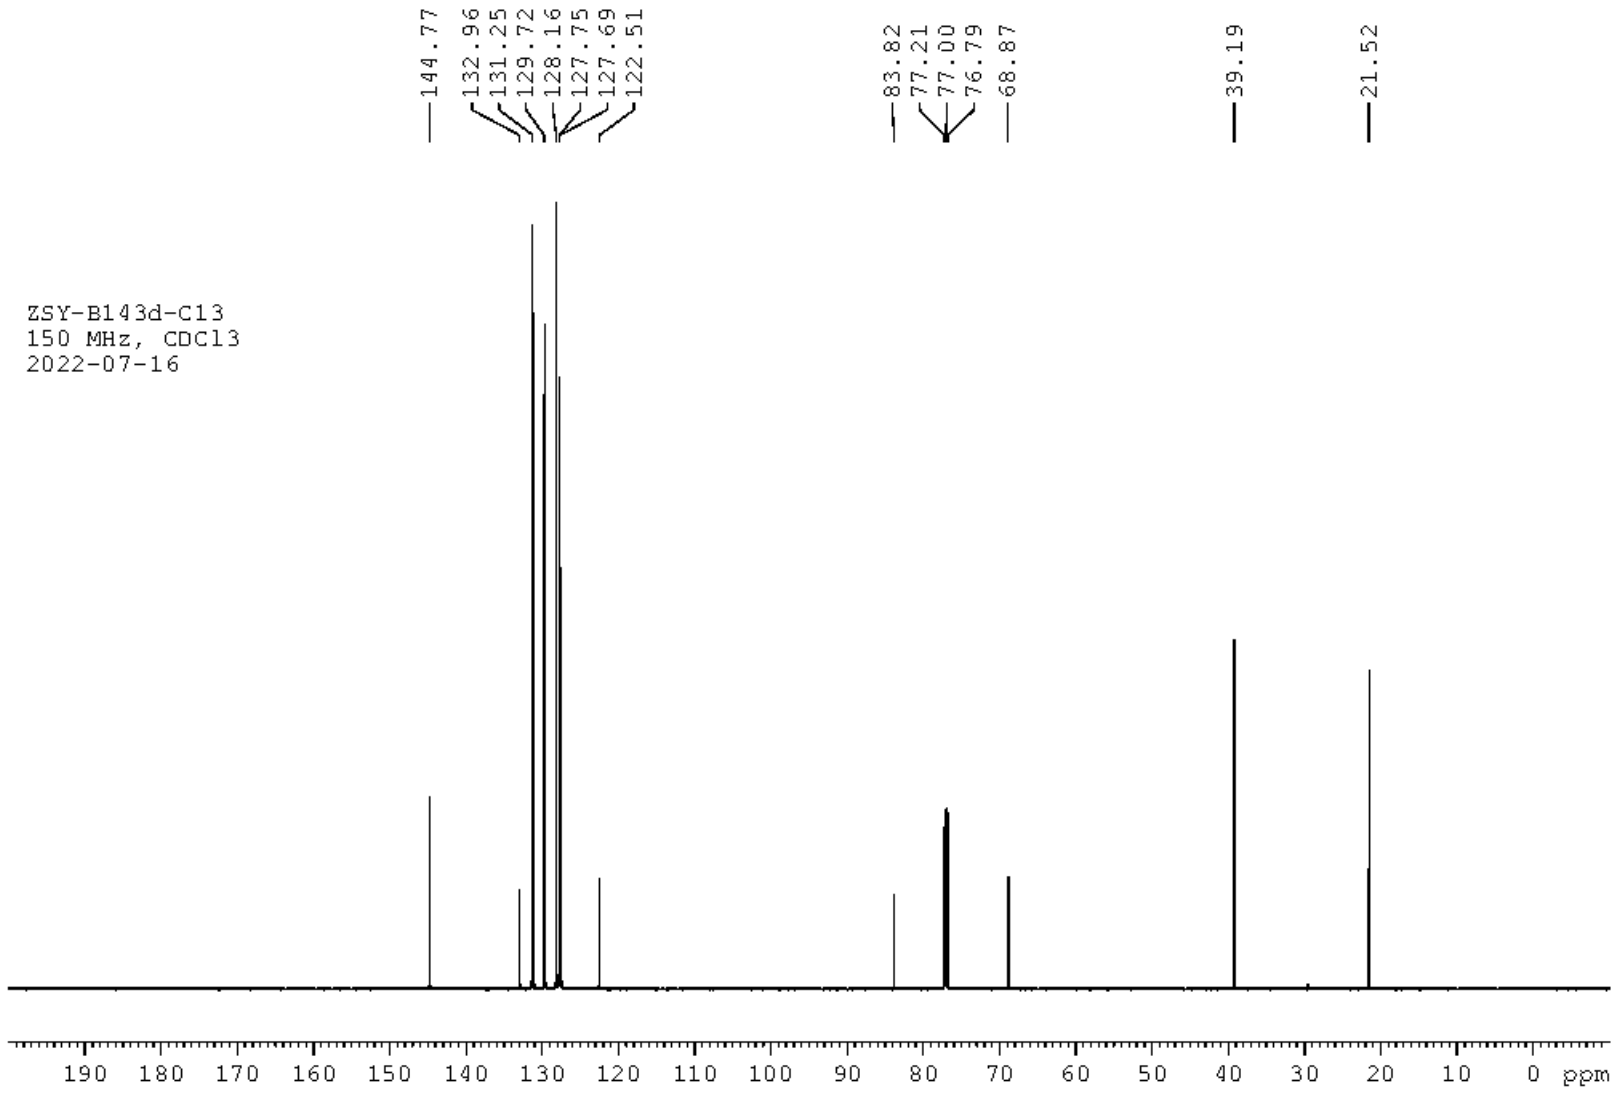

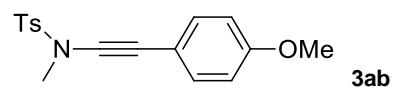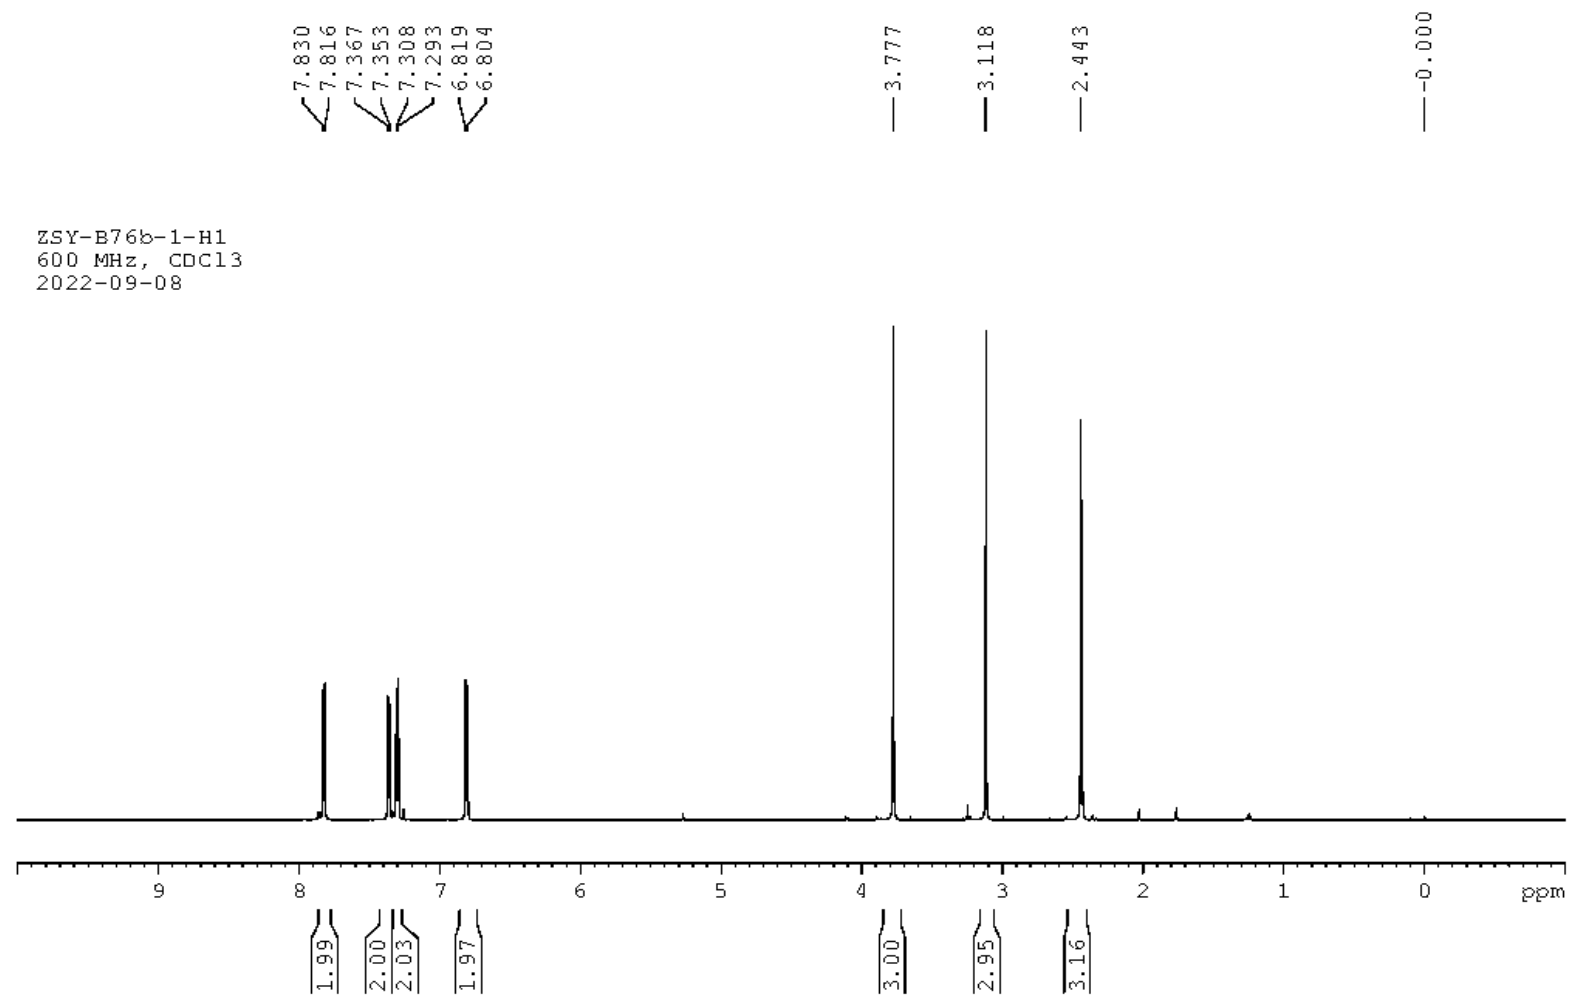



ZSY-B76b-1-C13  
150 MHz, CDCl<sub>3</sub>  
2022-09-08

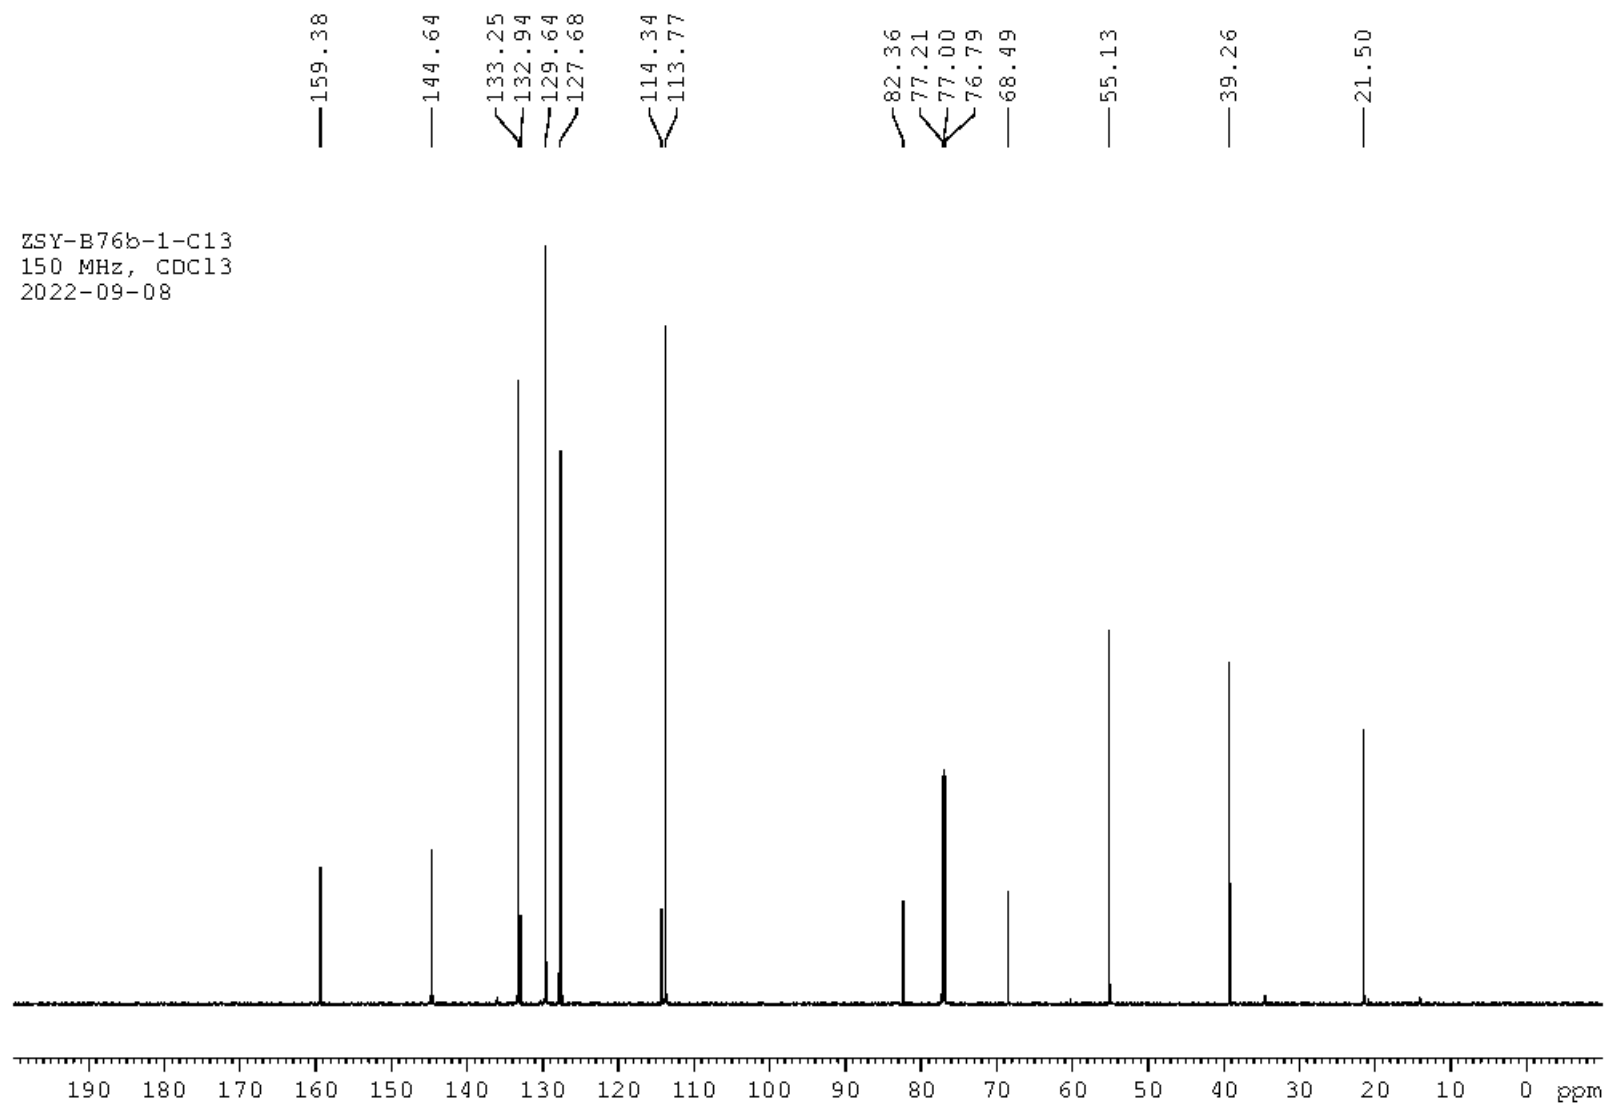

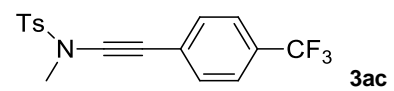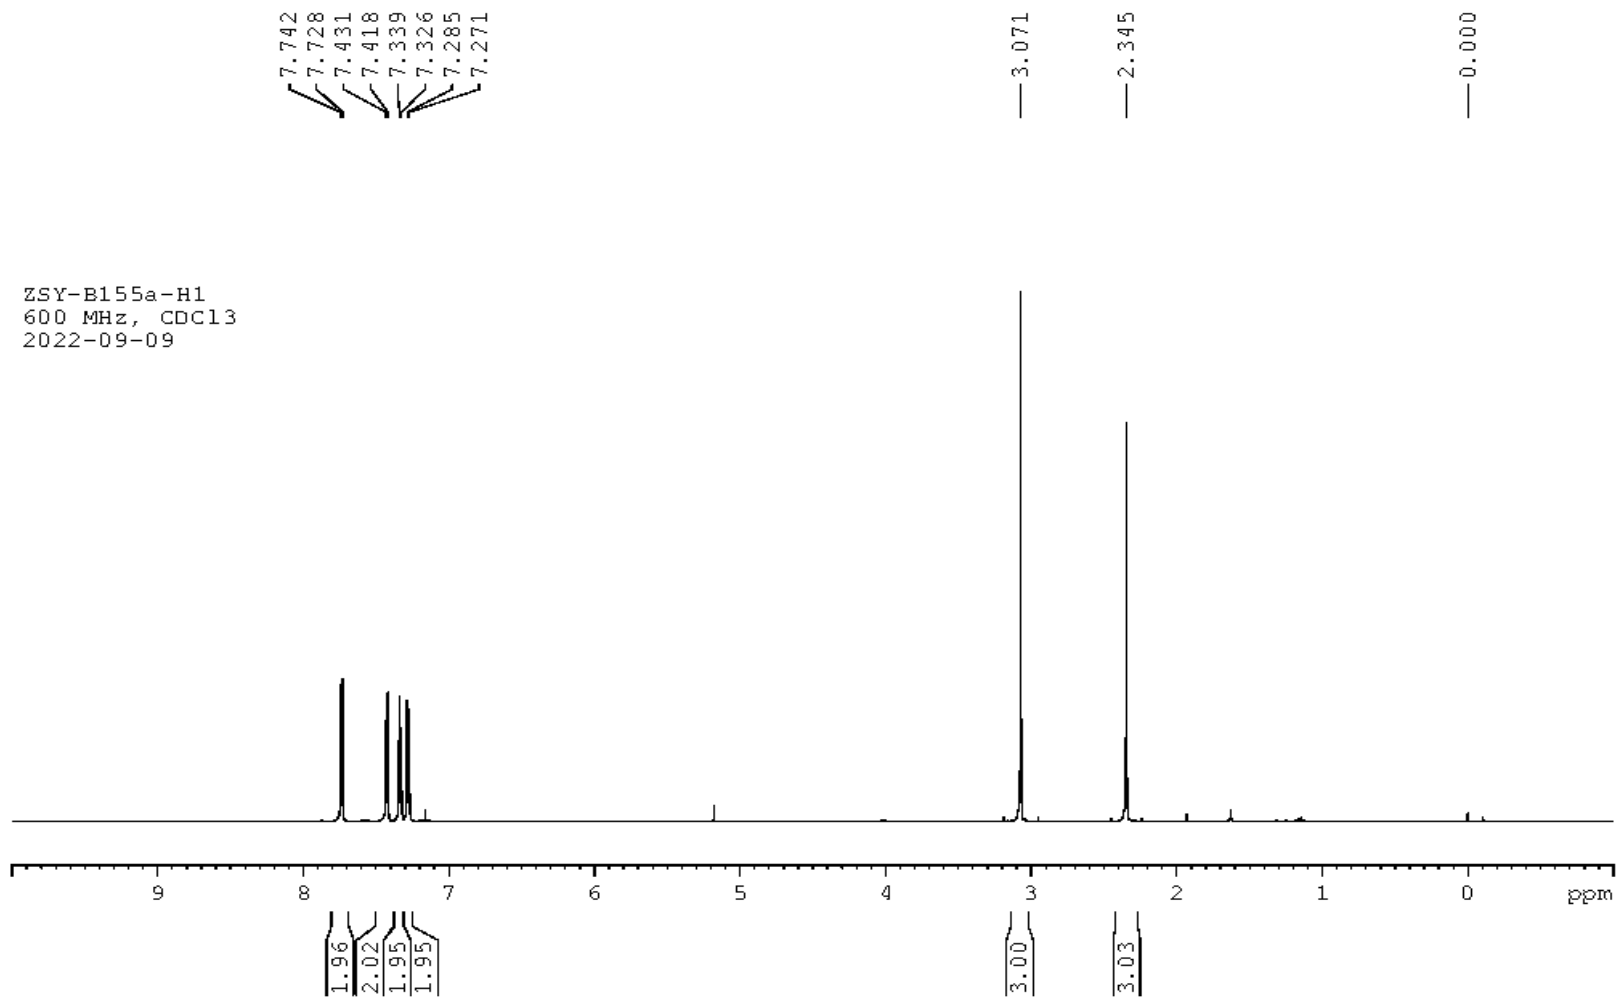

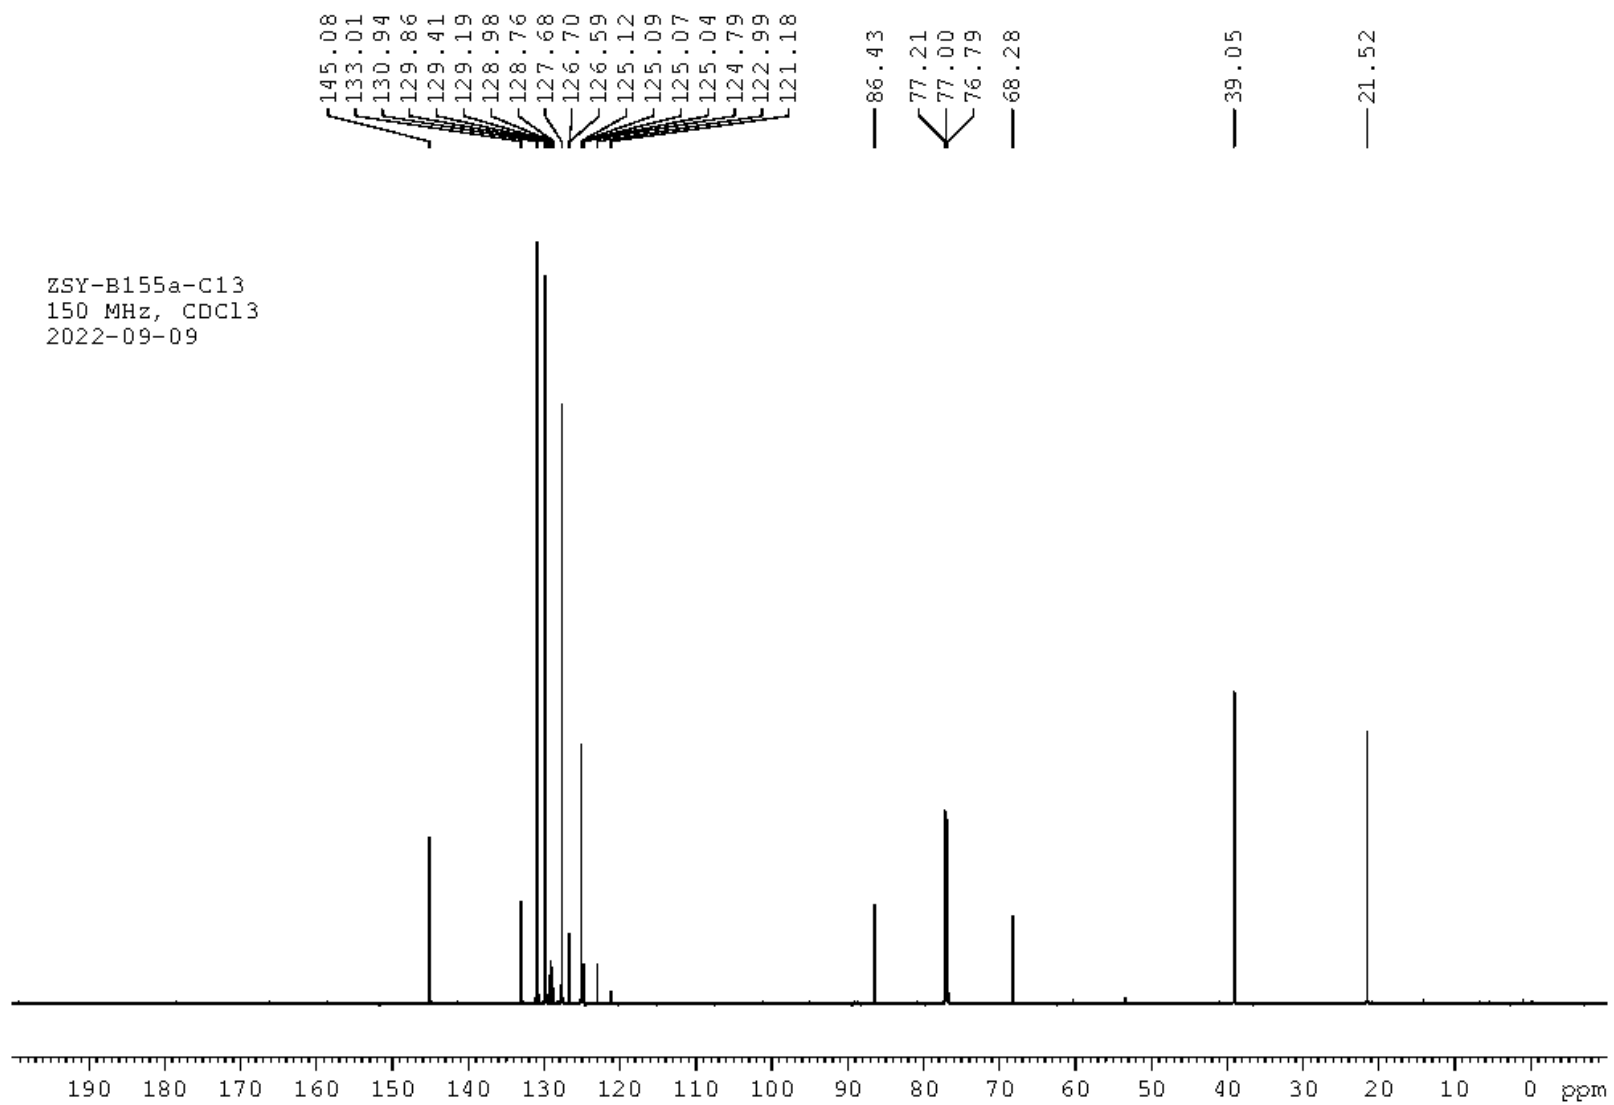

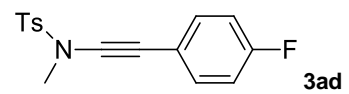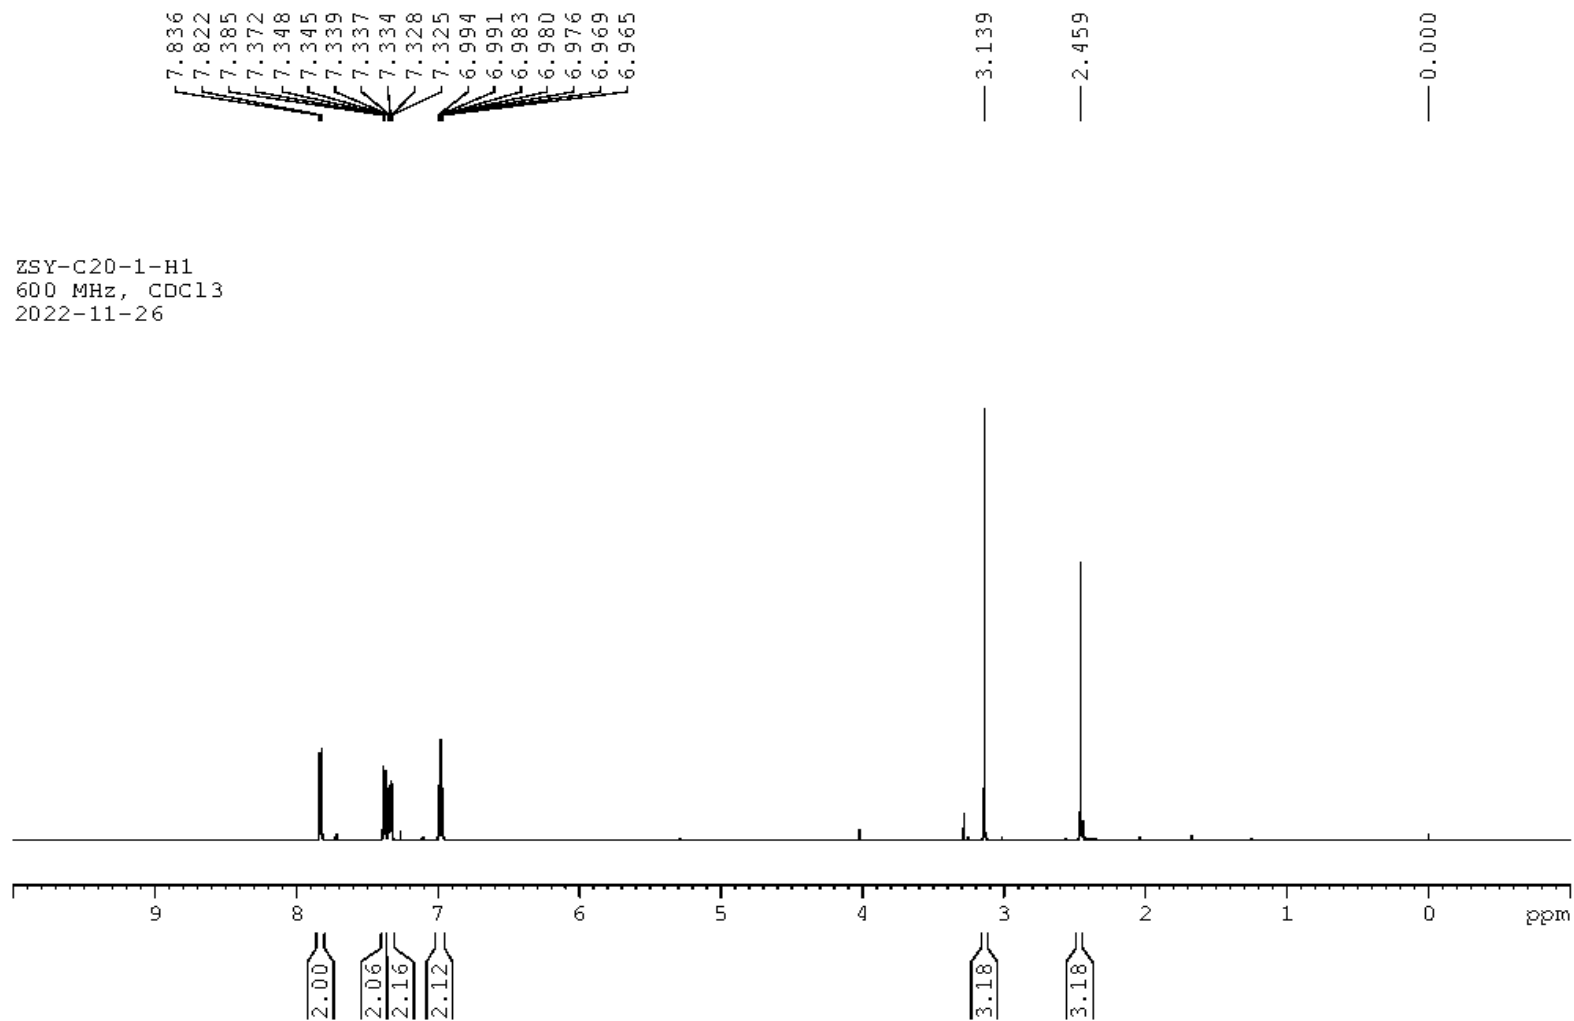

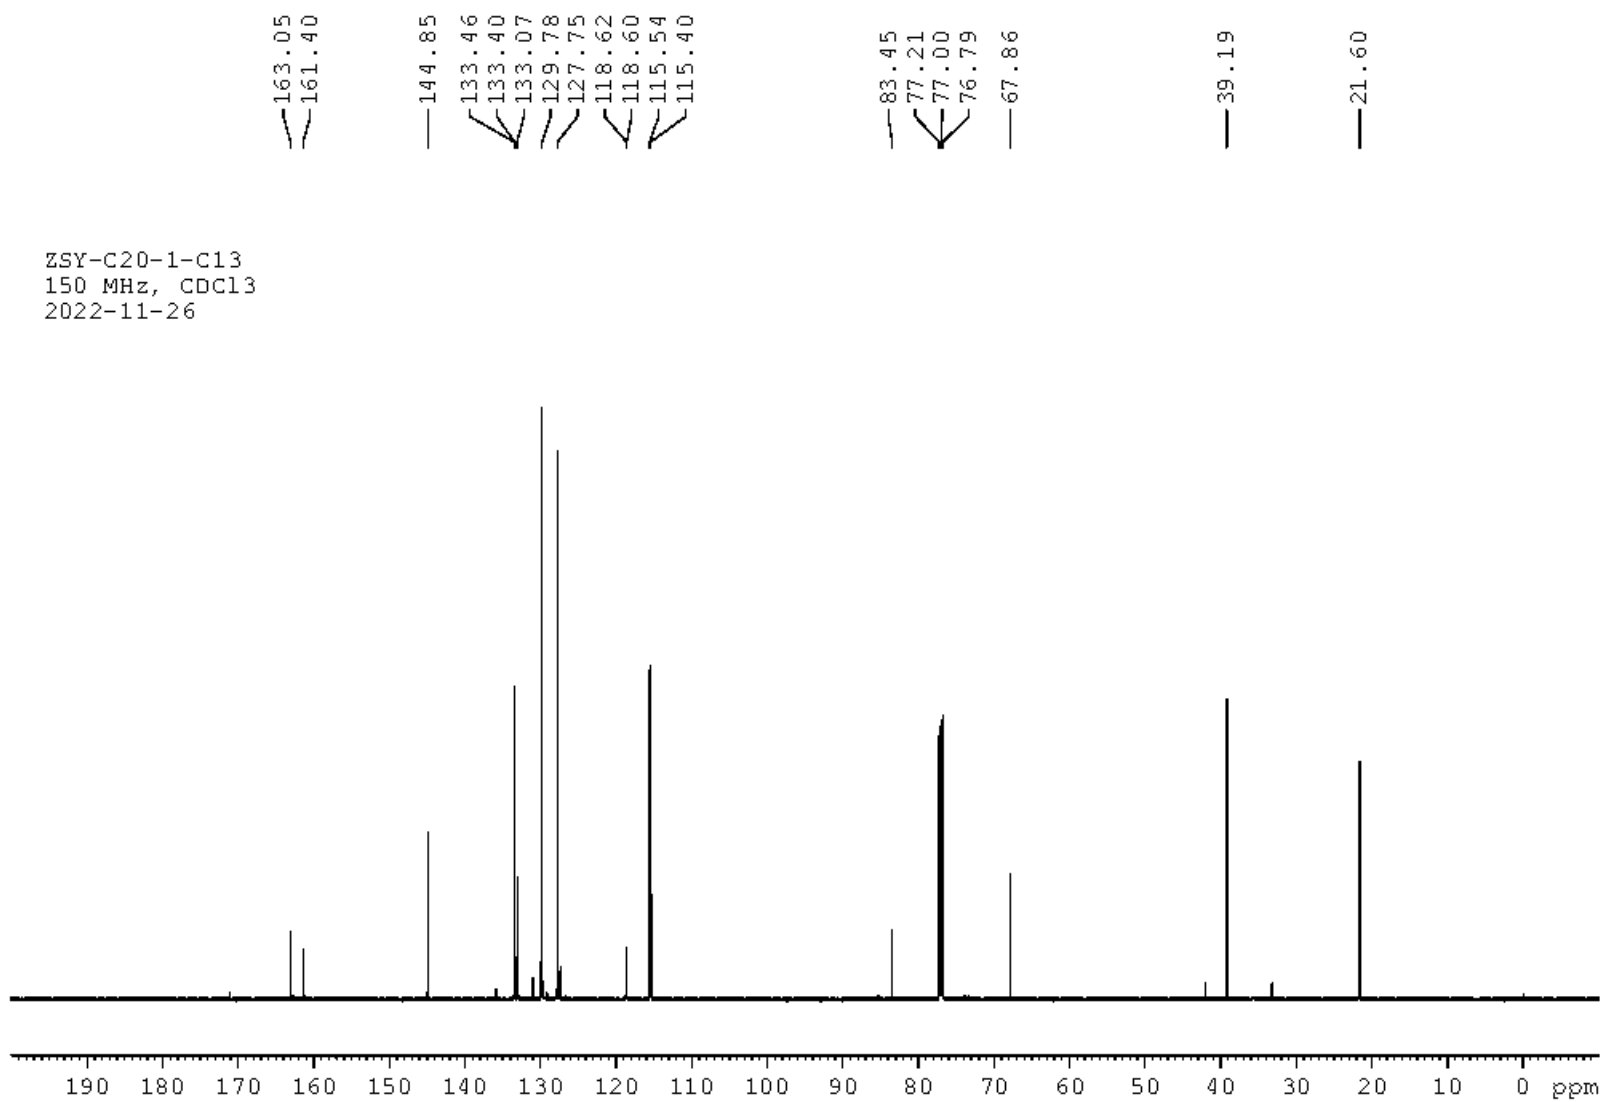

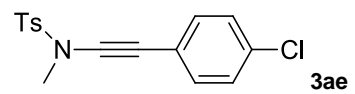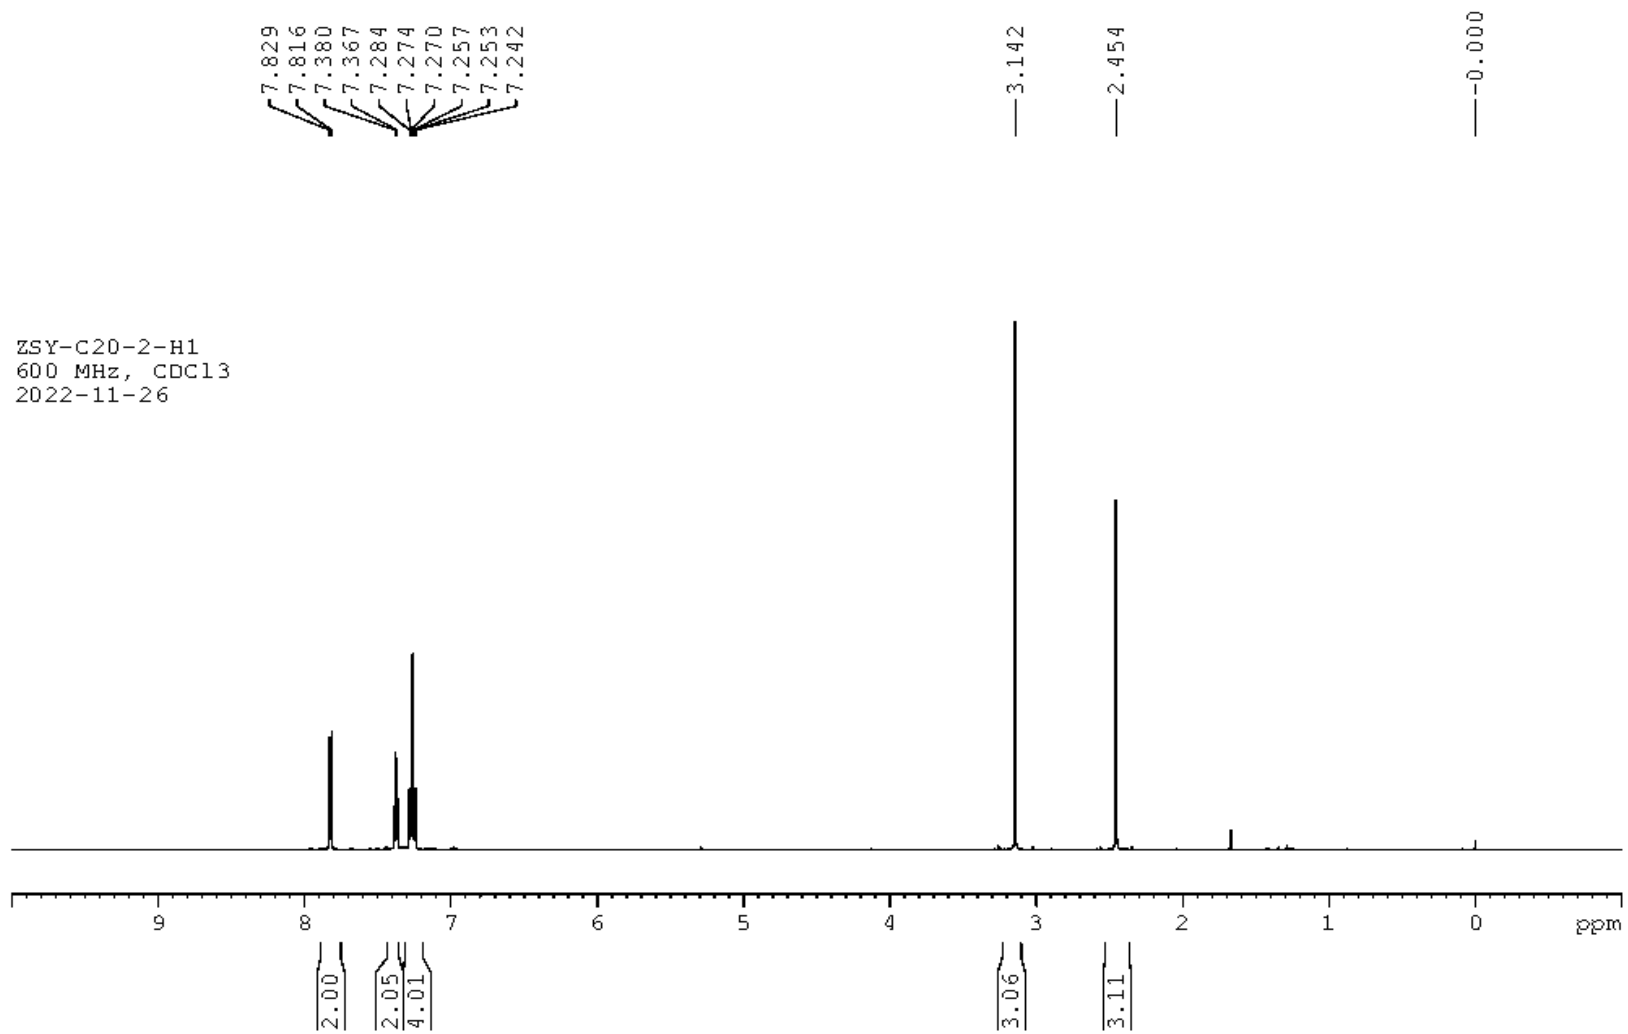

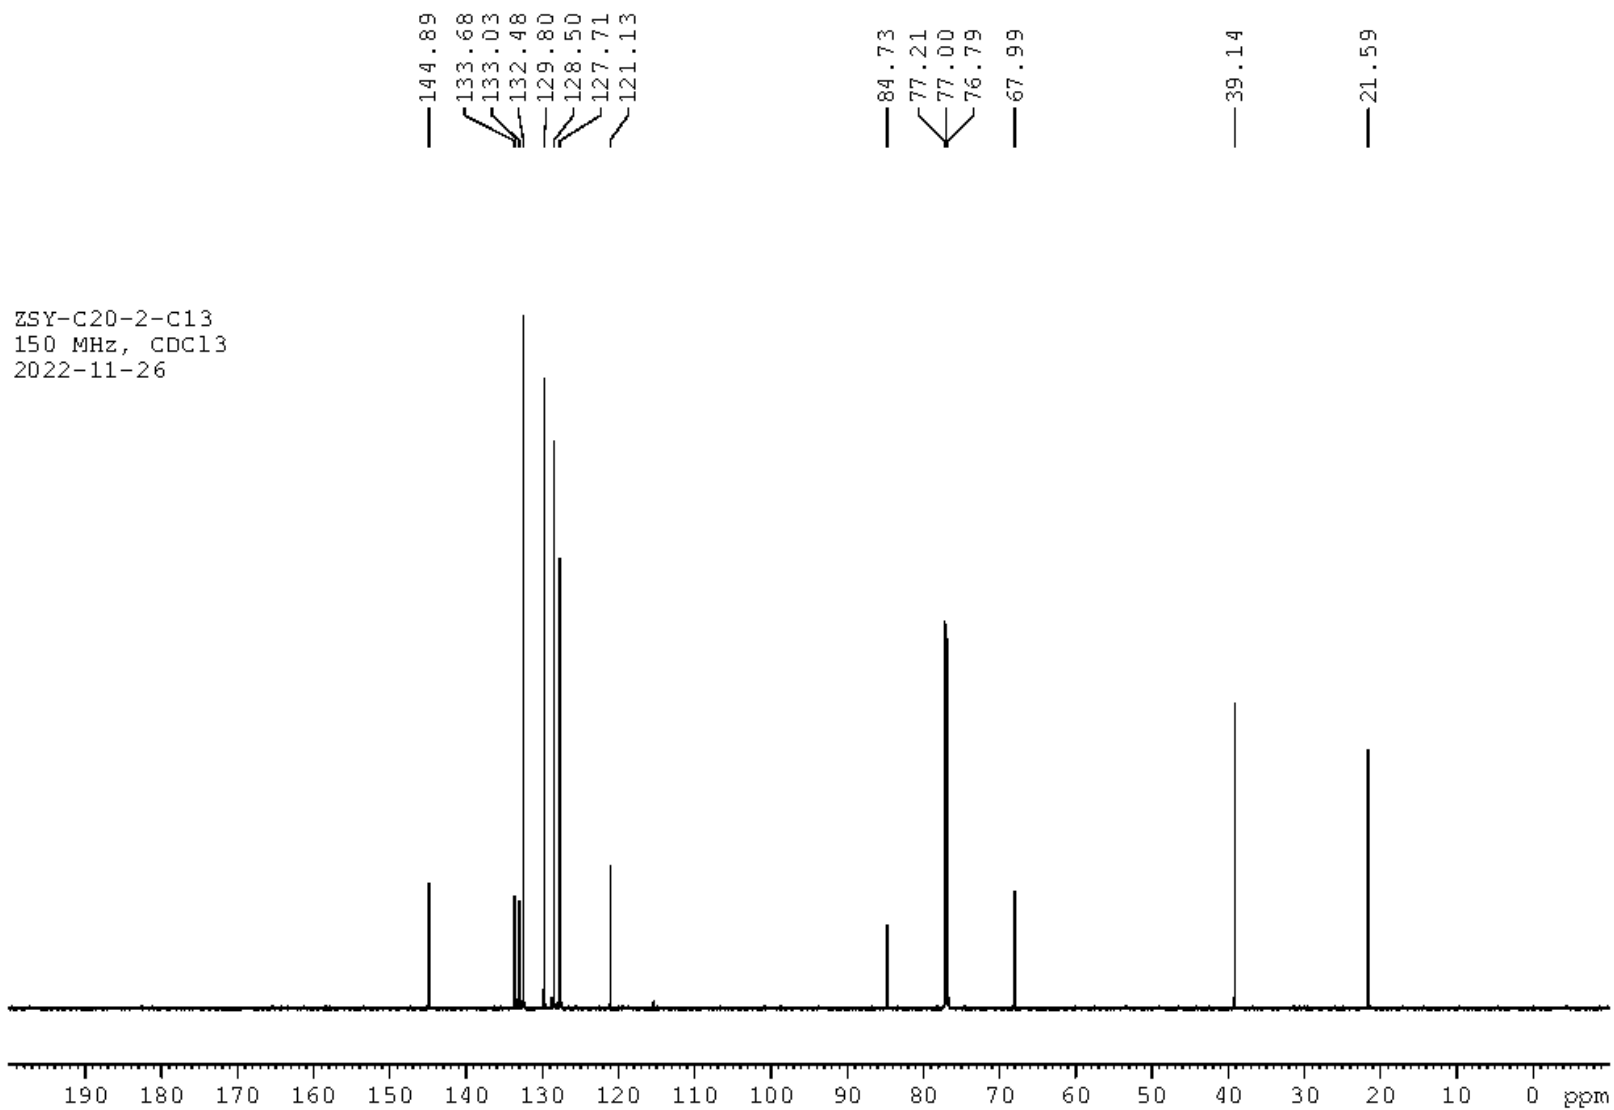

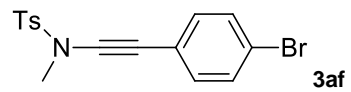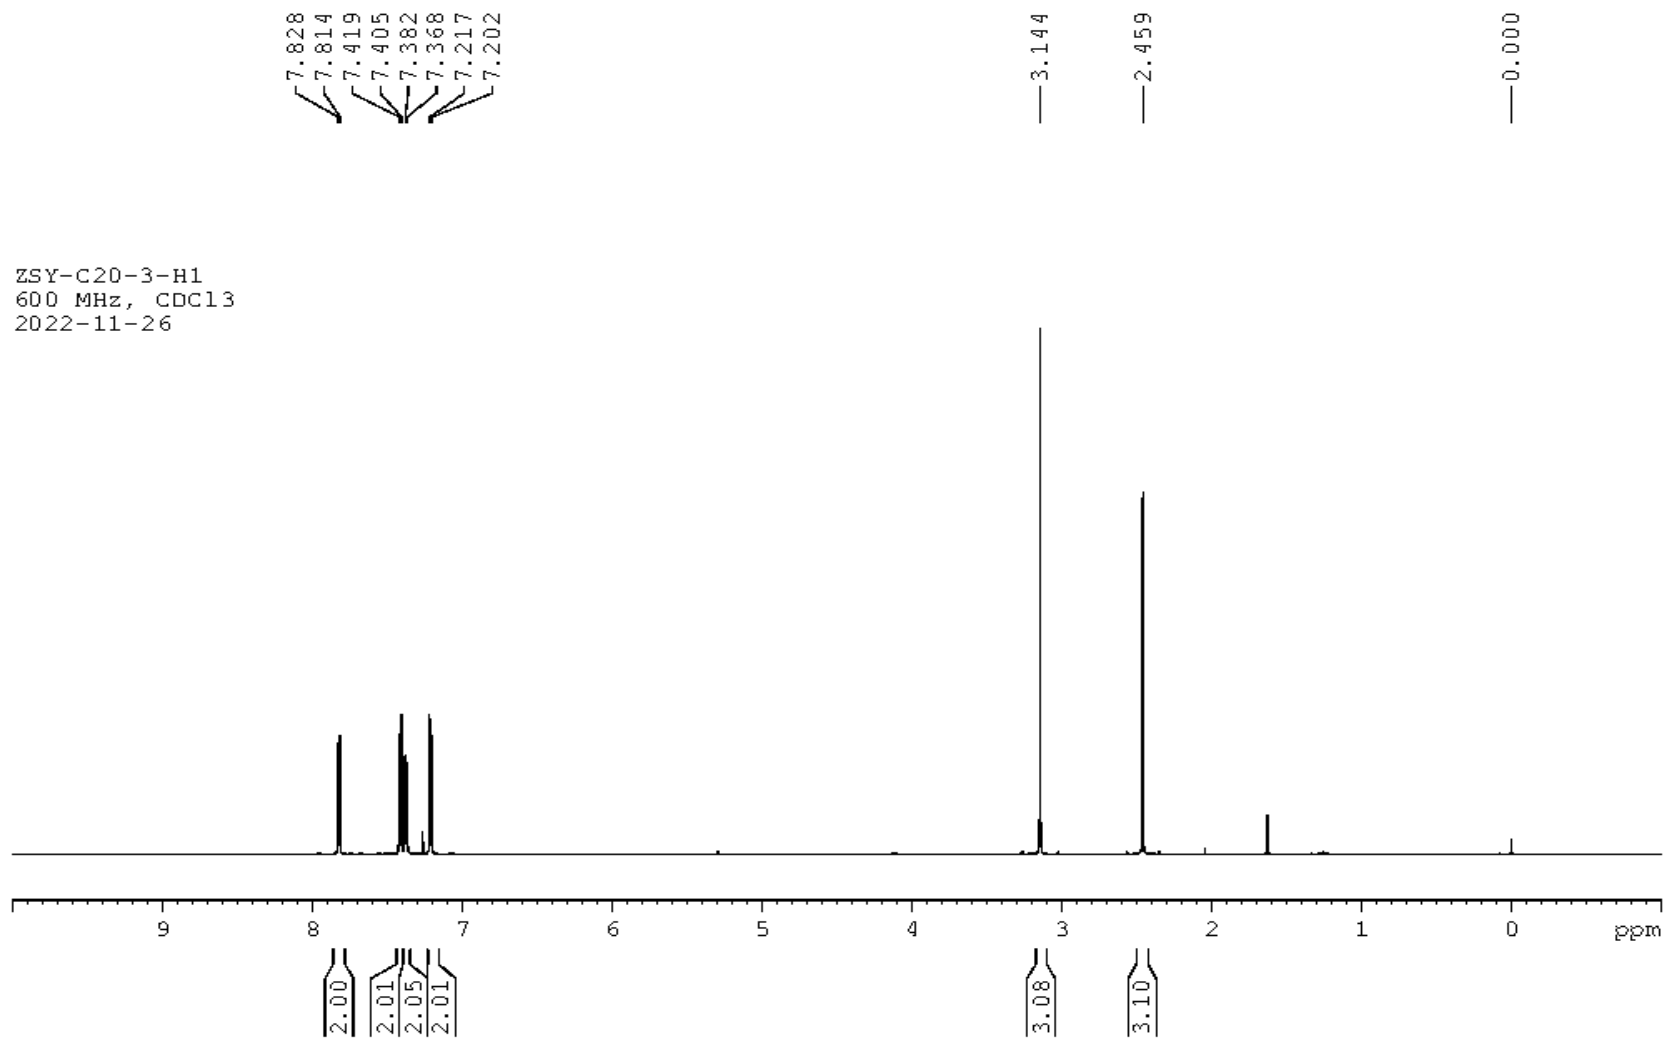



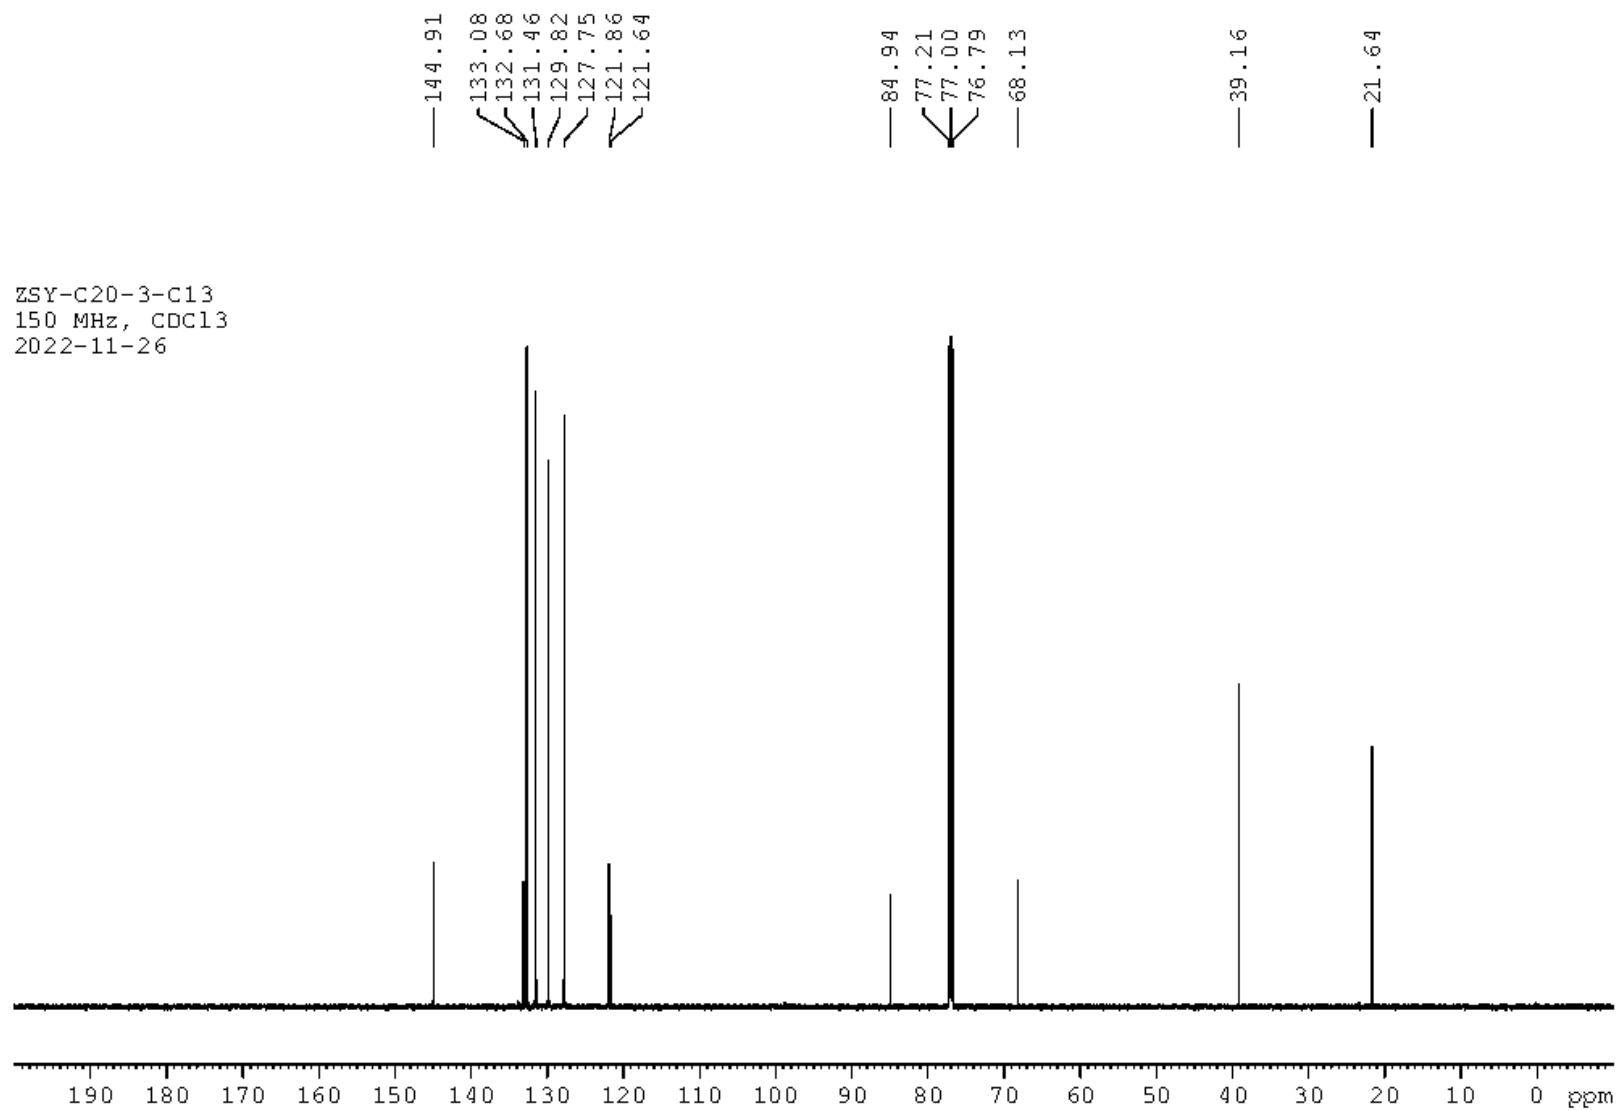

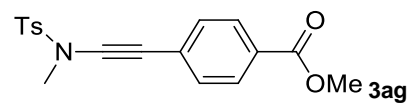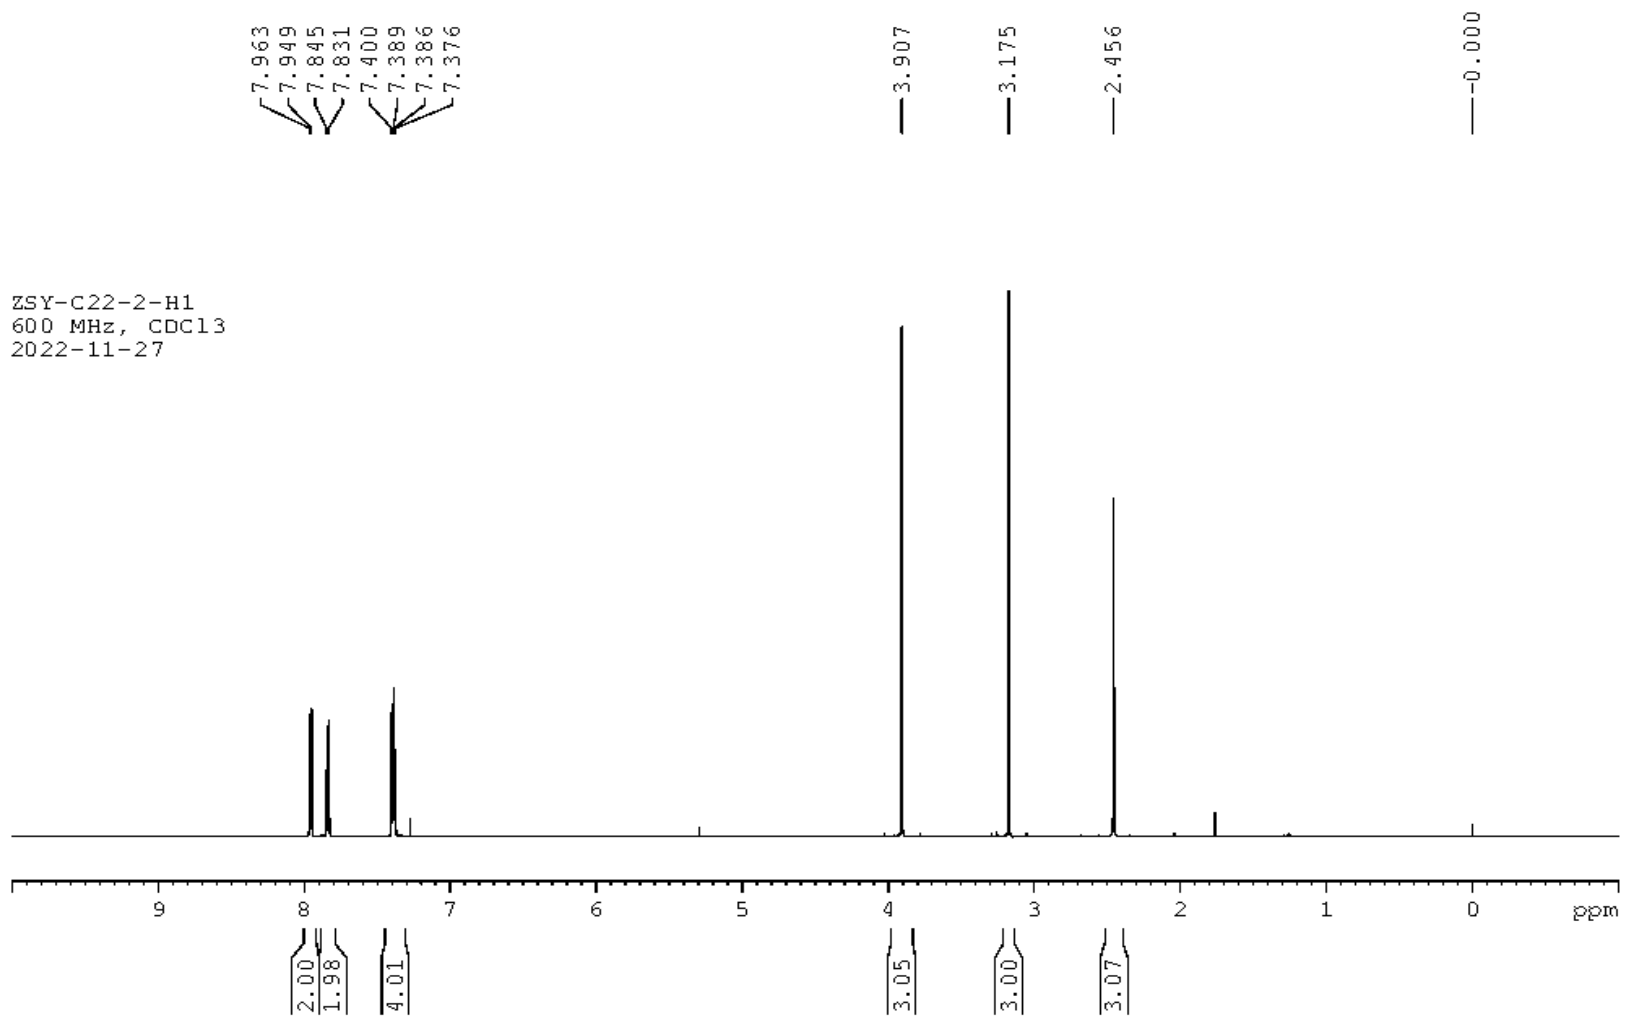

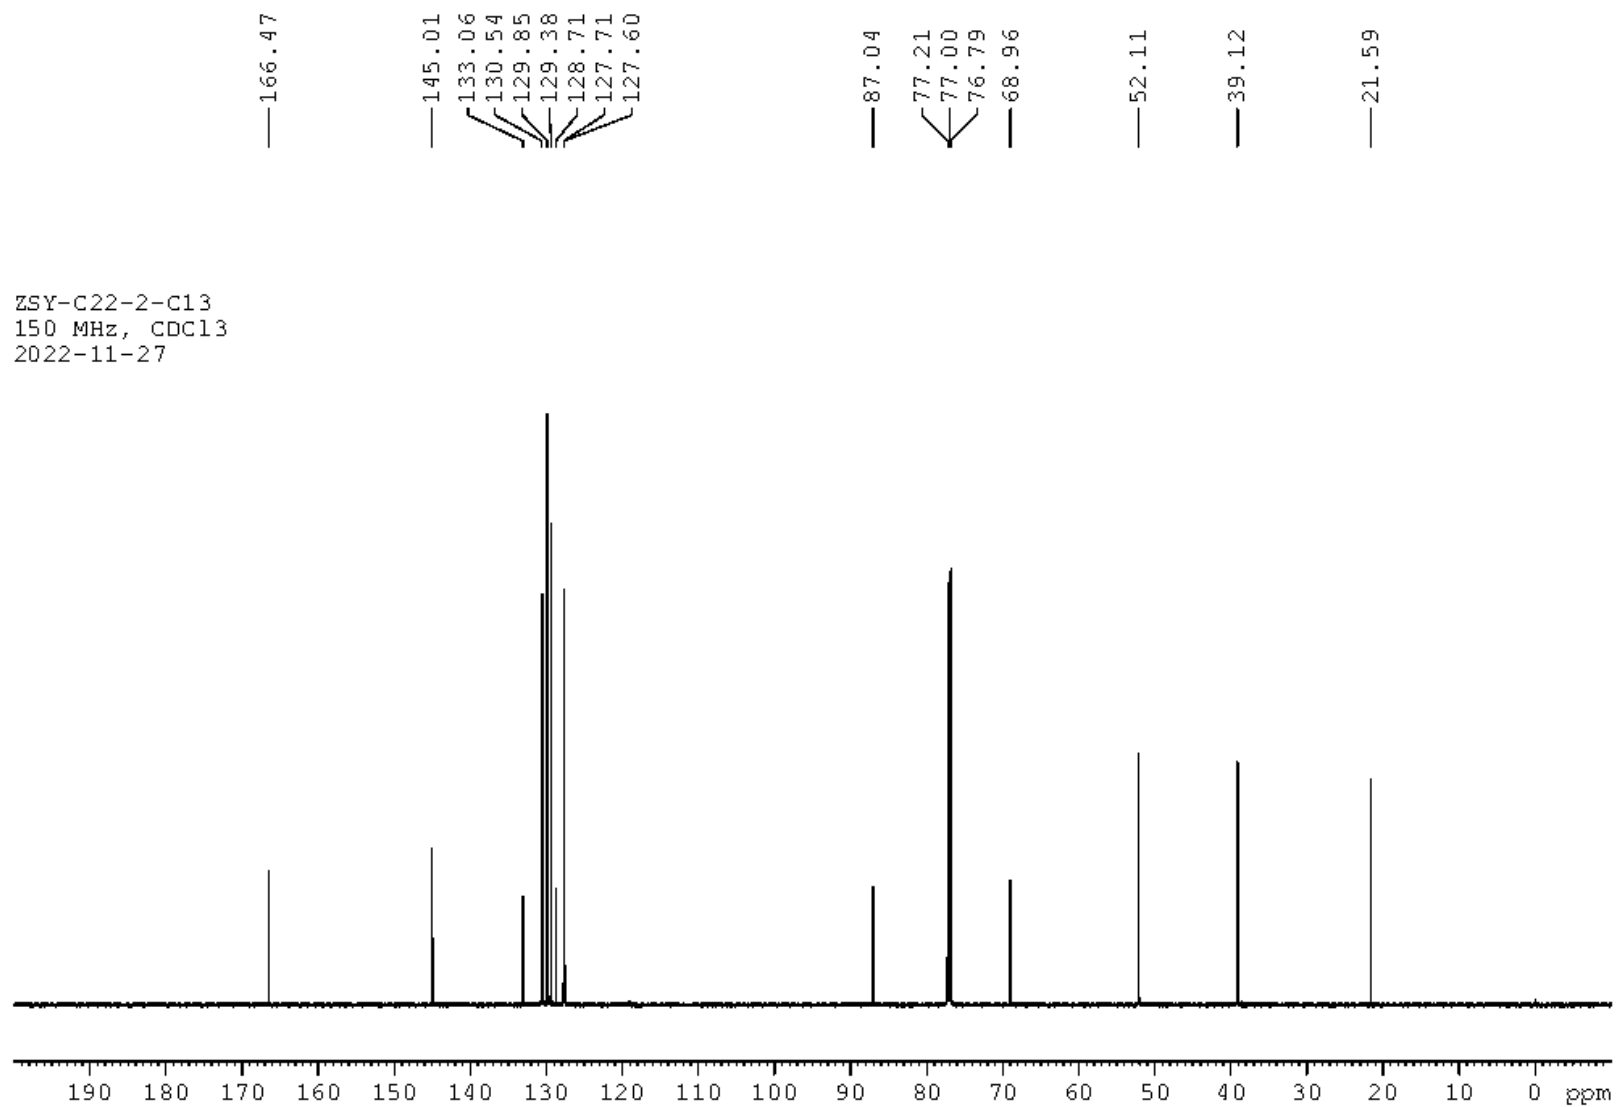

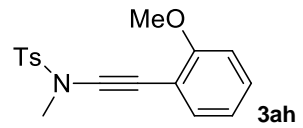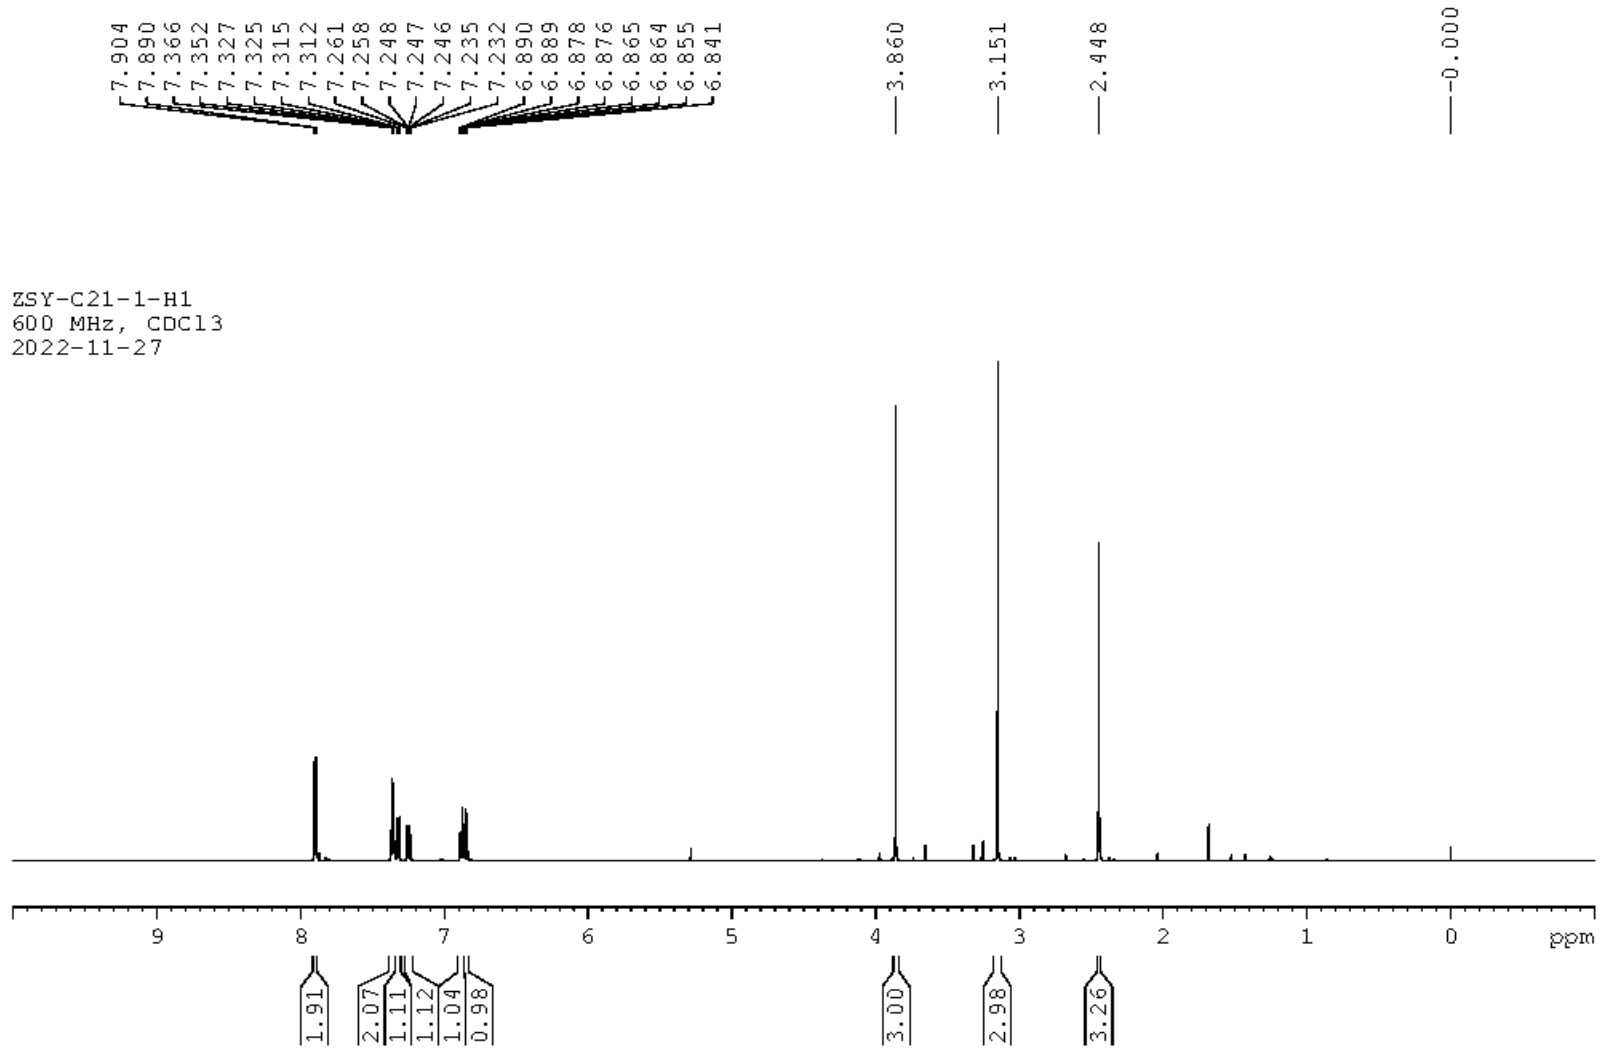

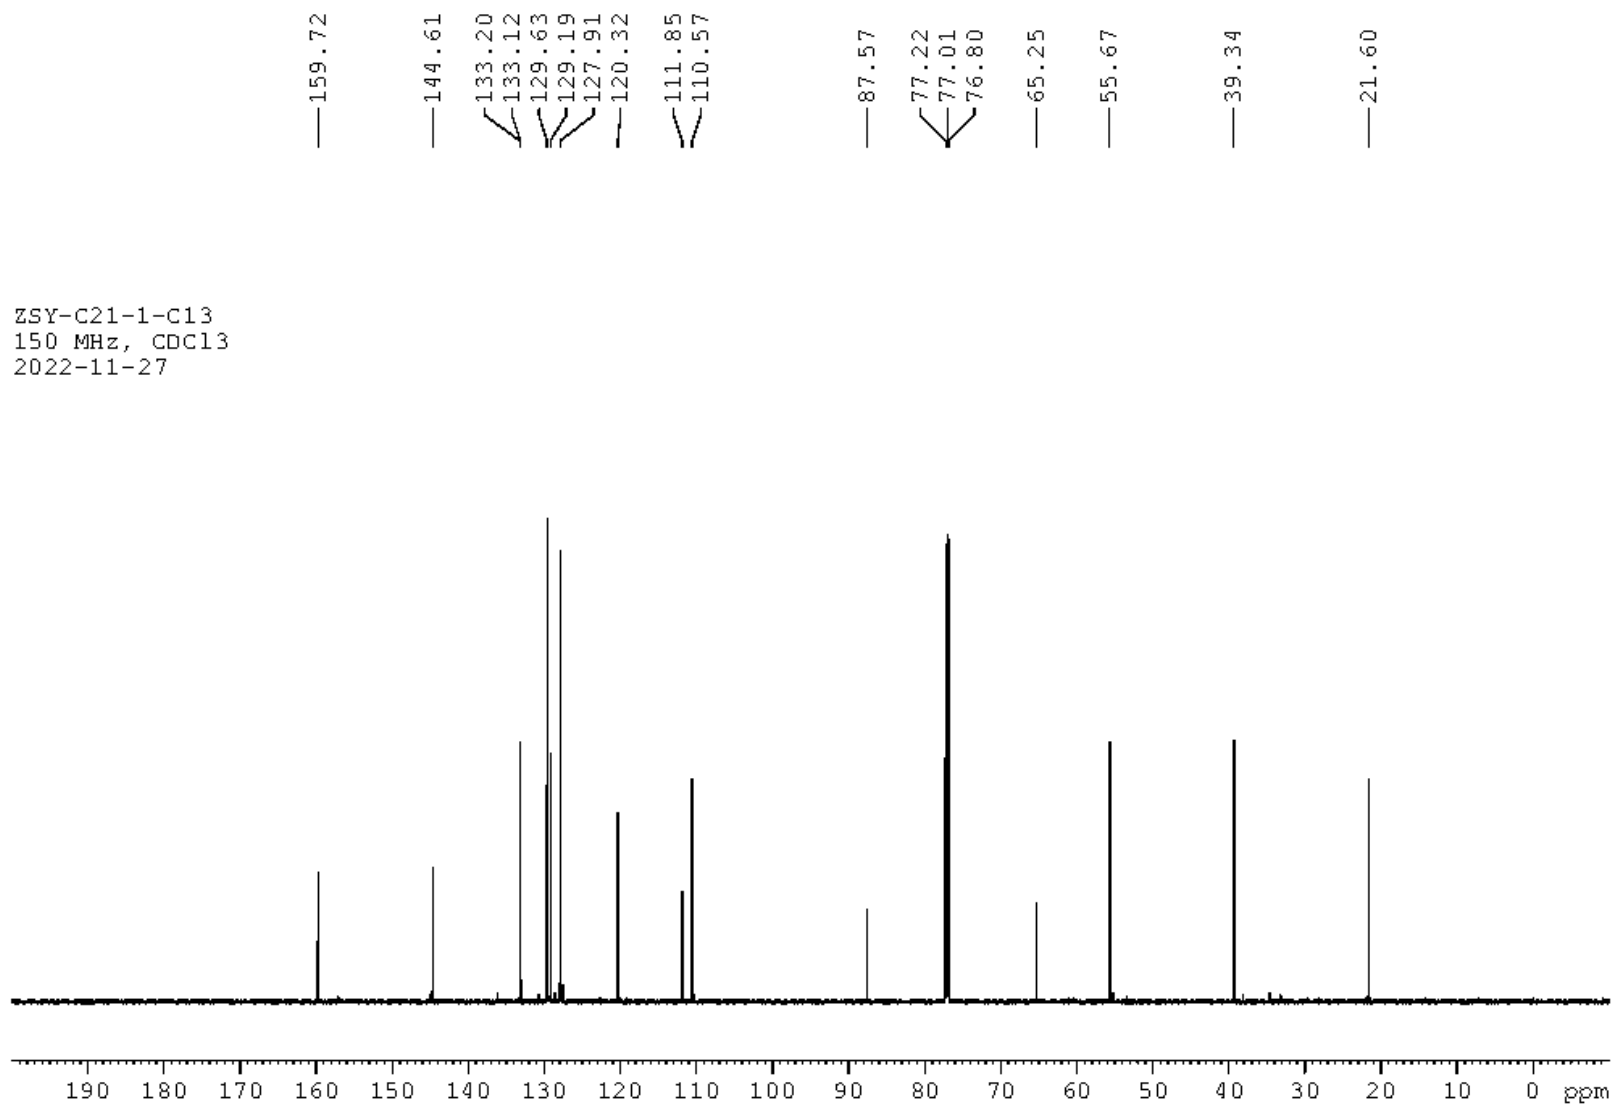

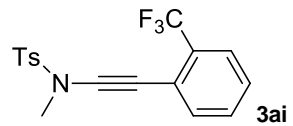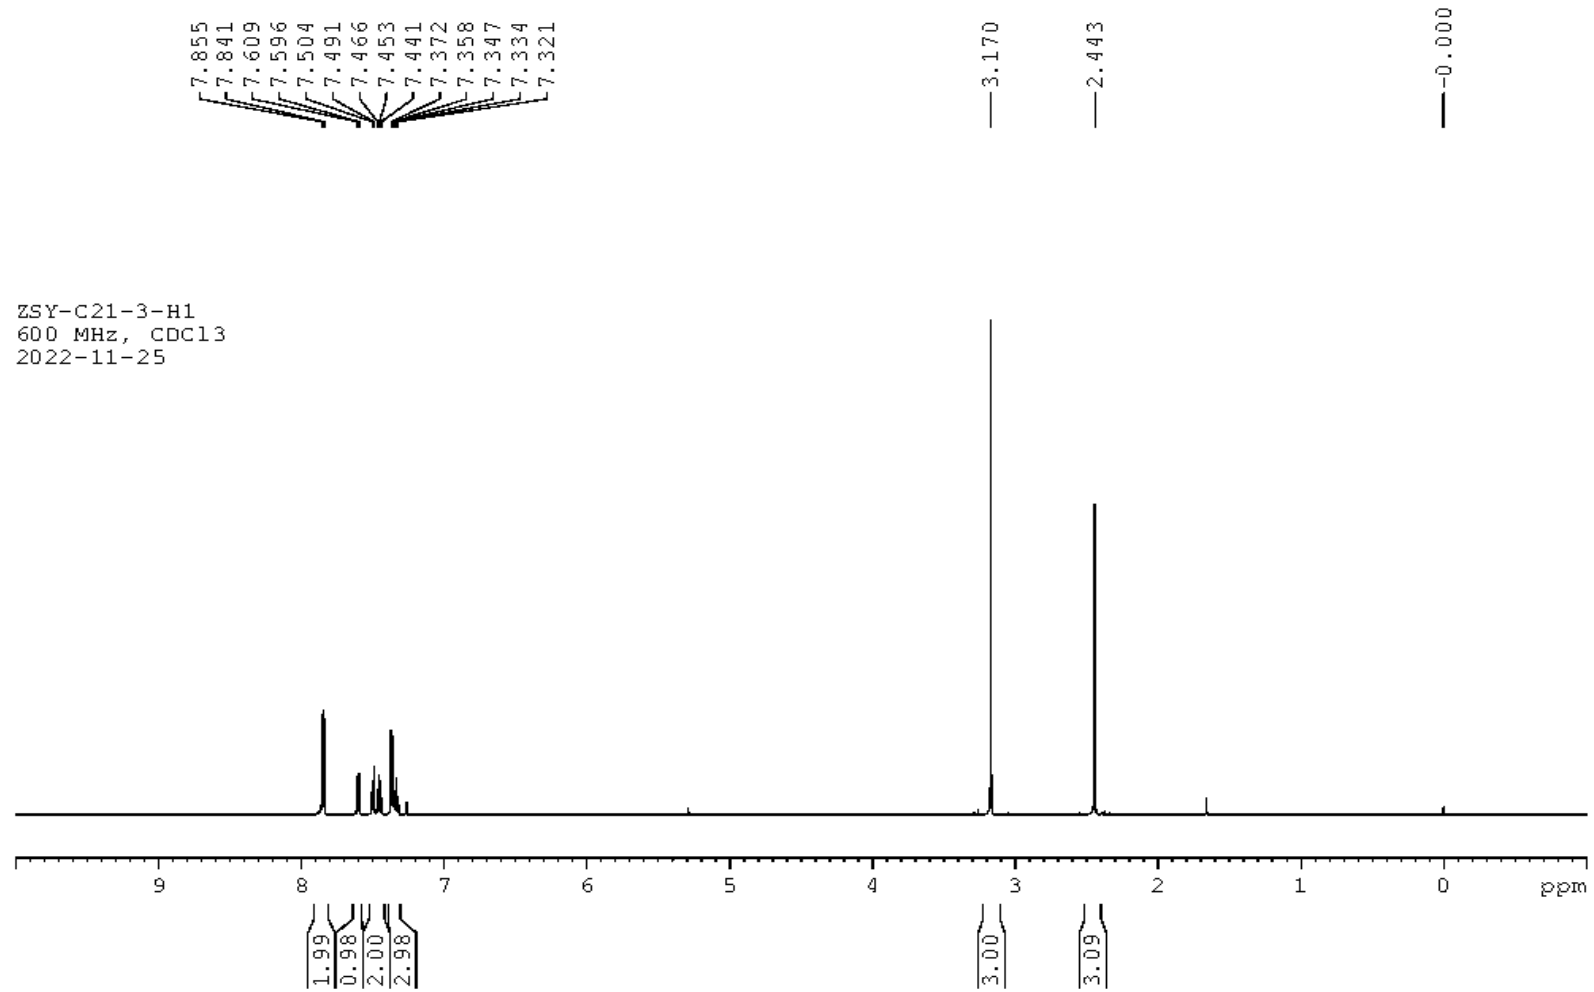

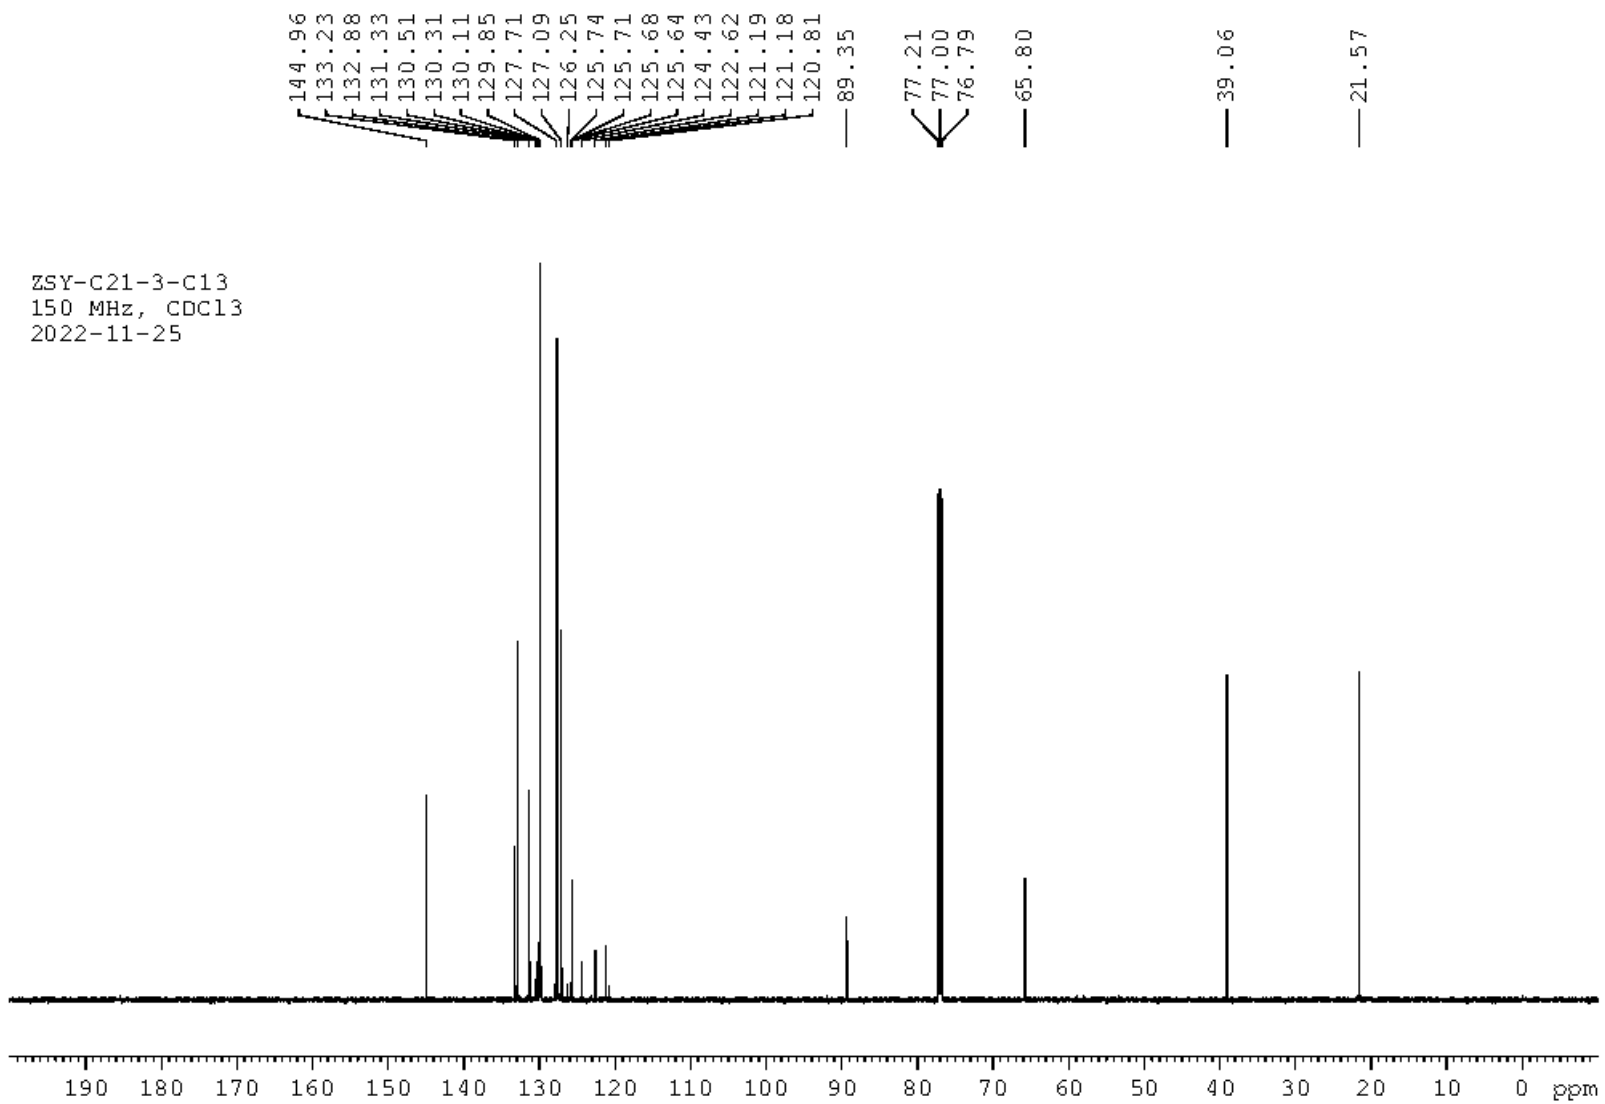

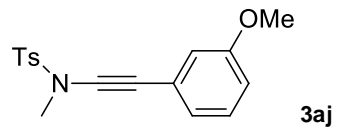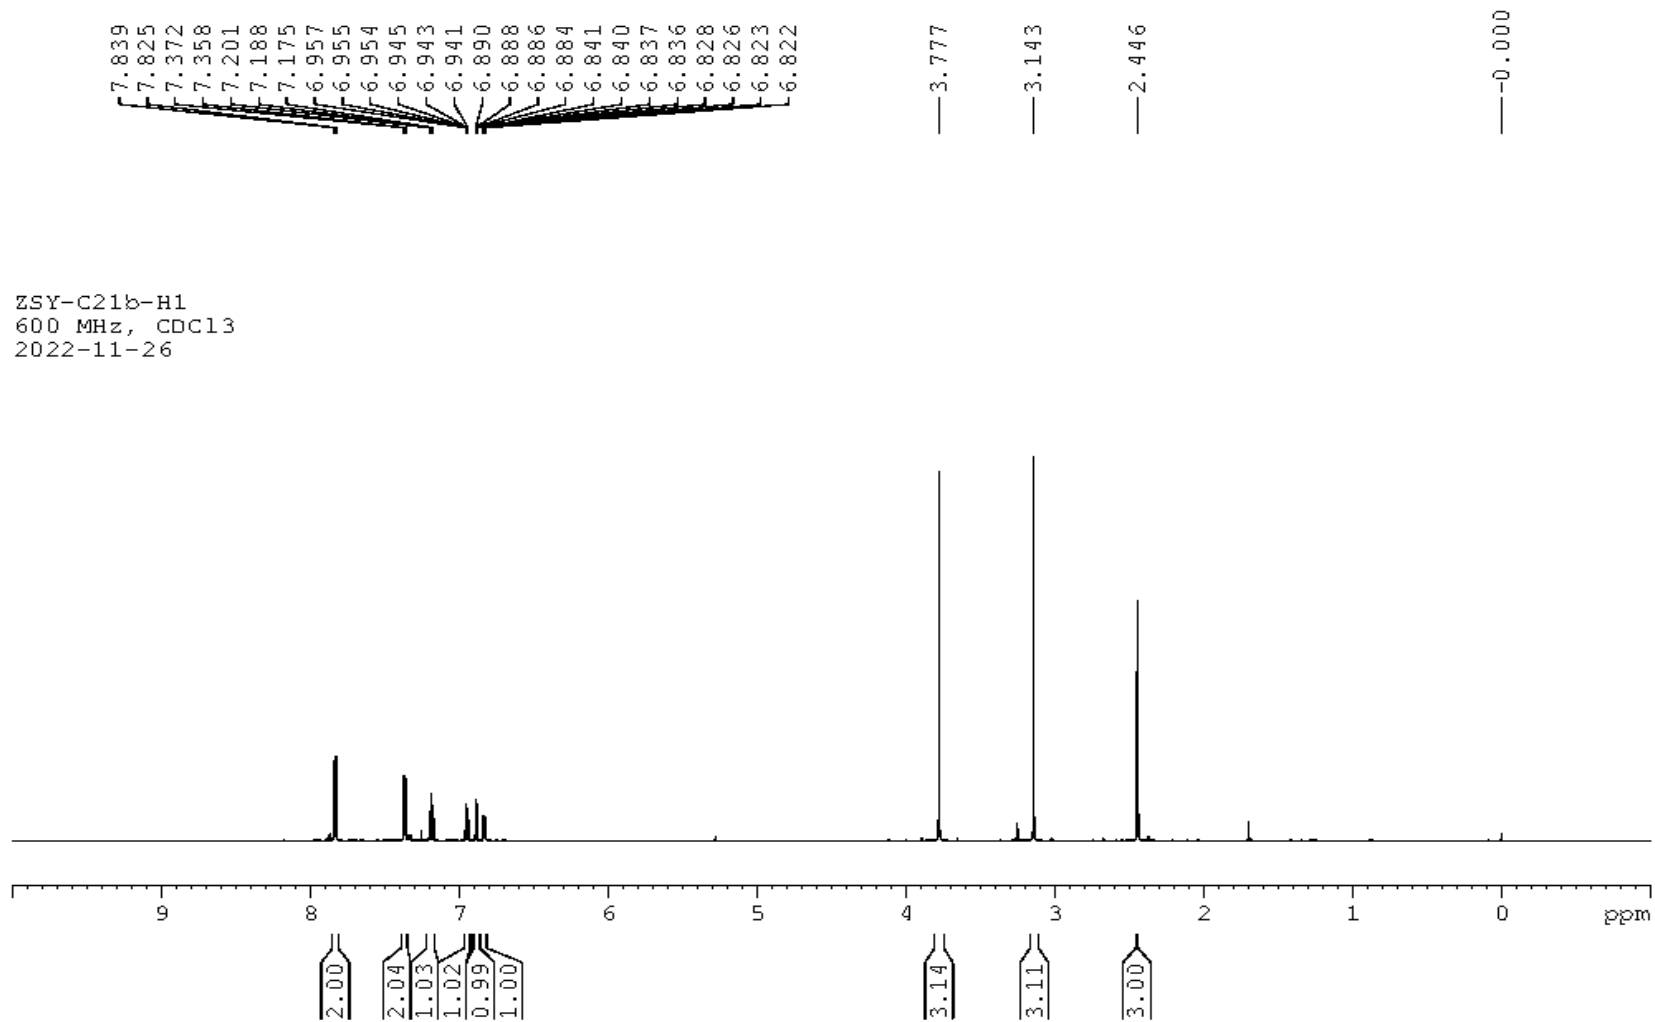



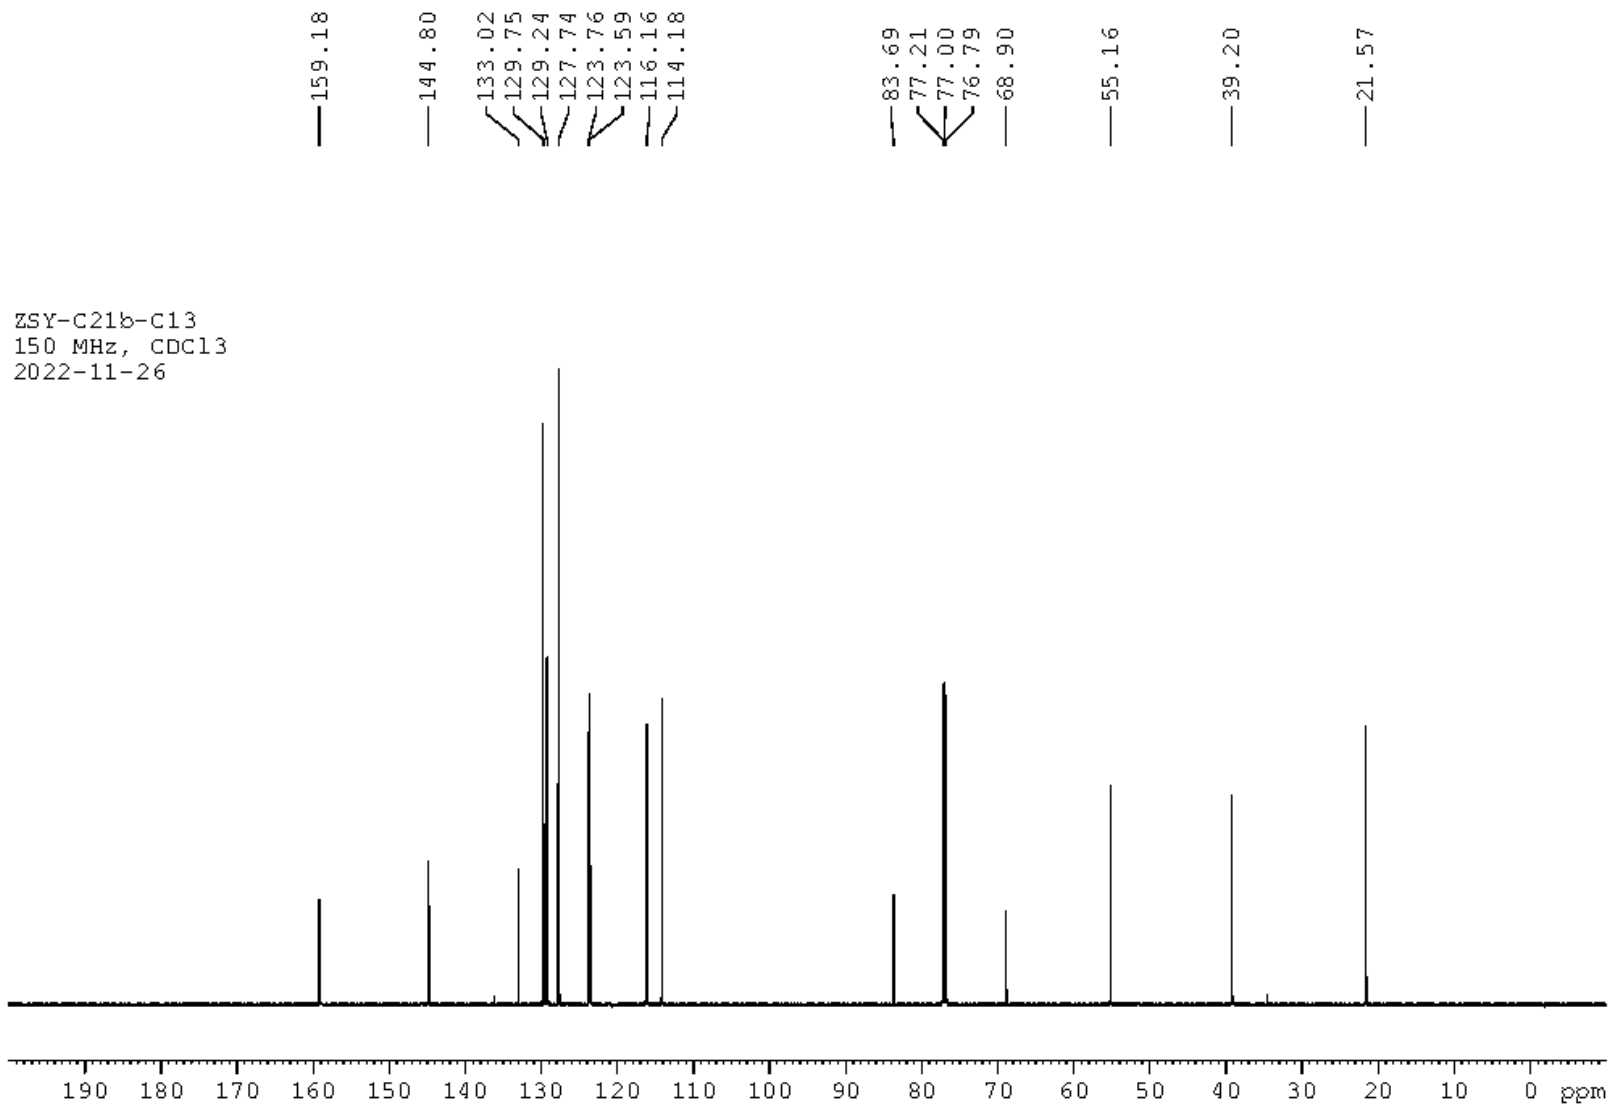

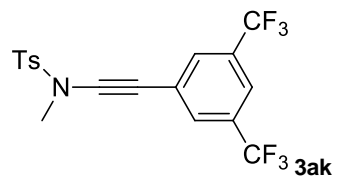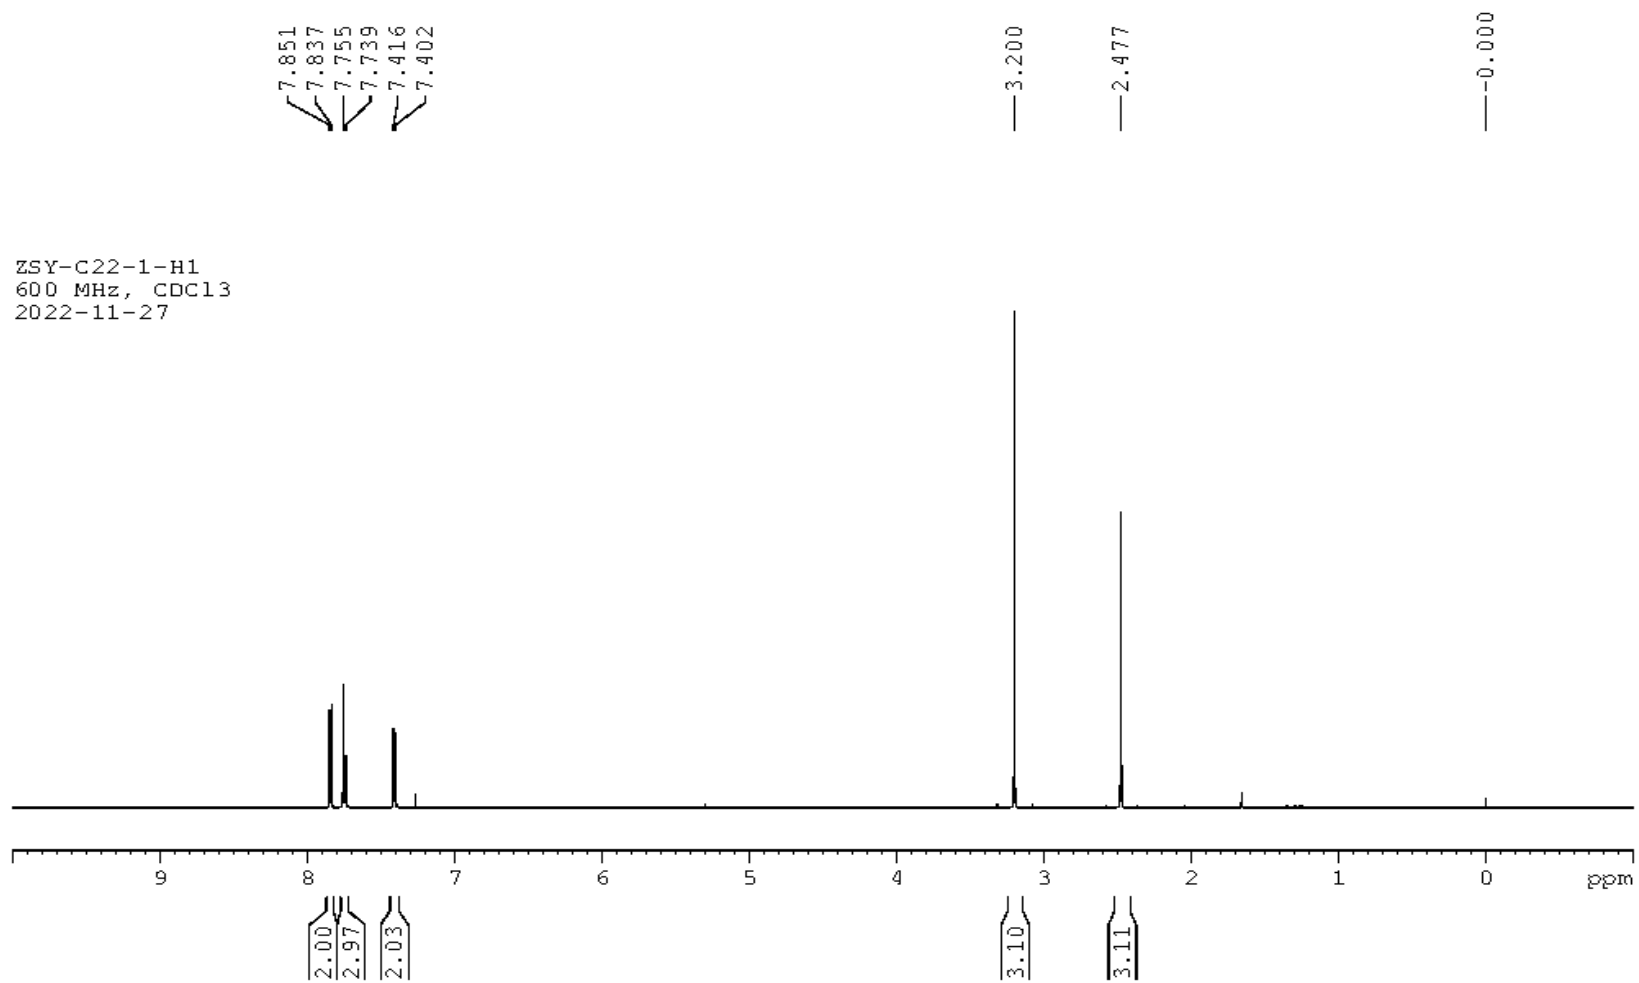

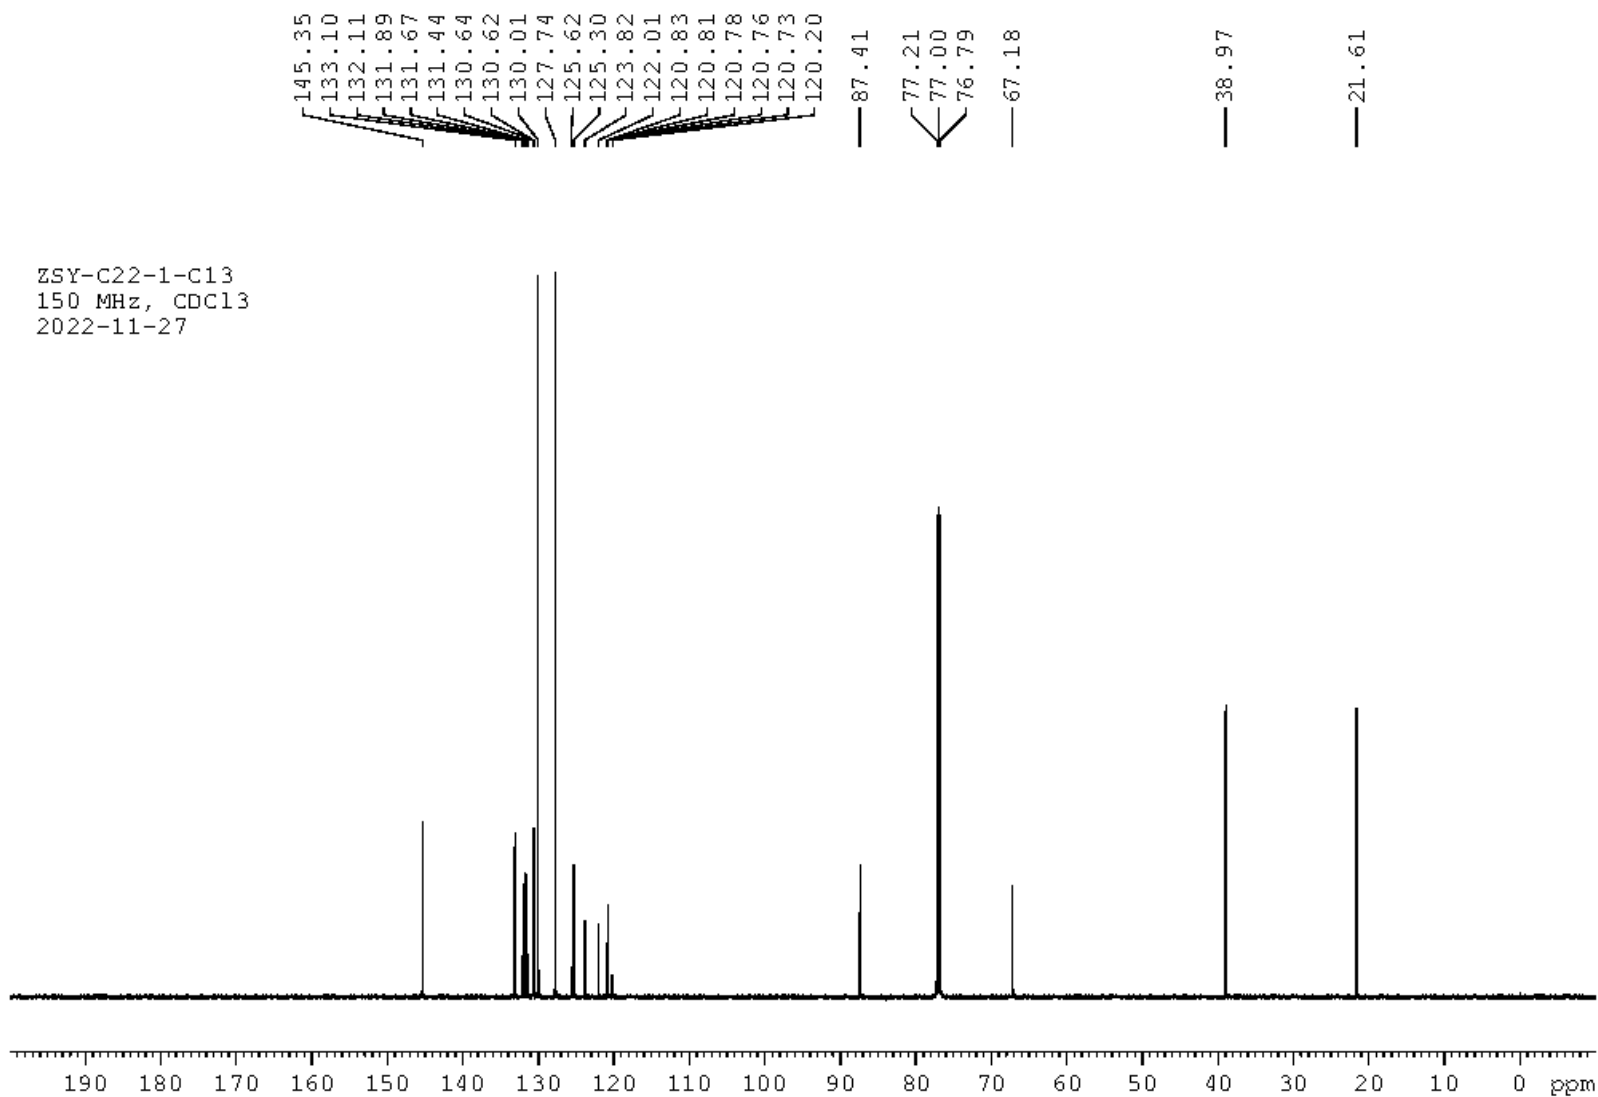

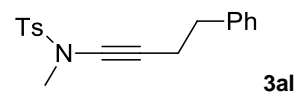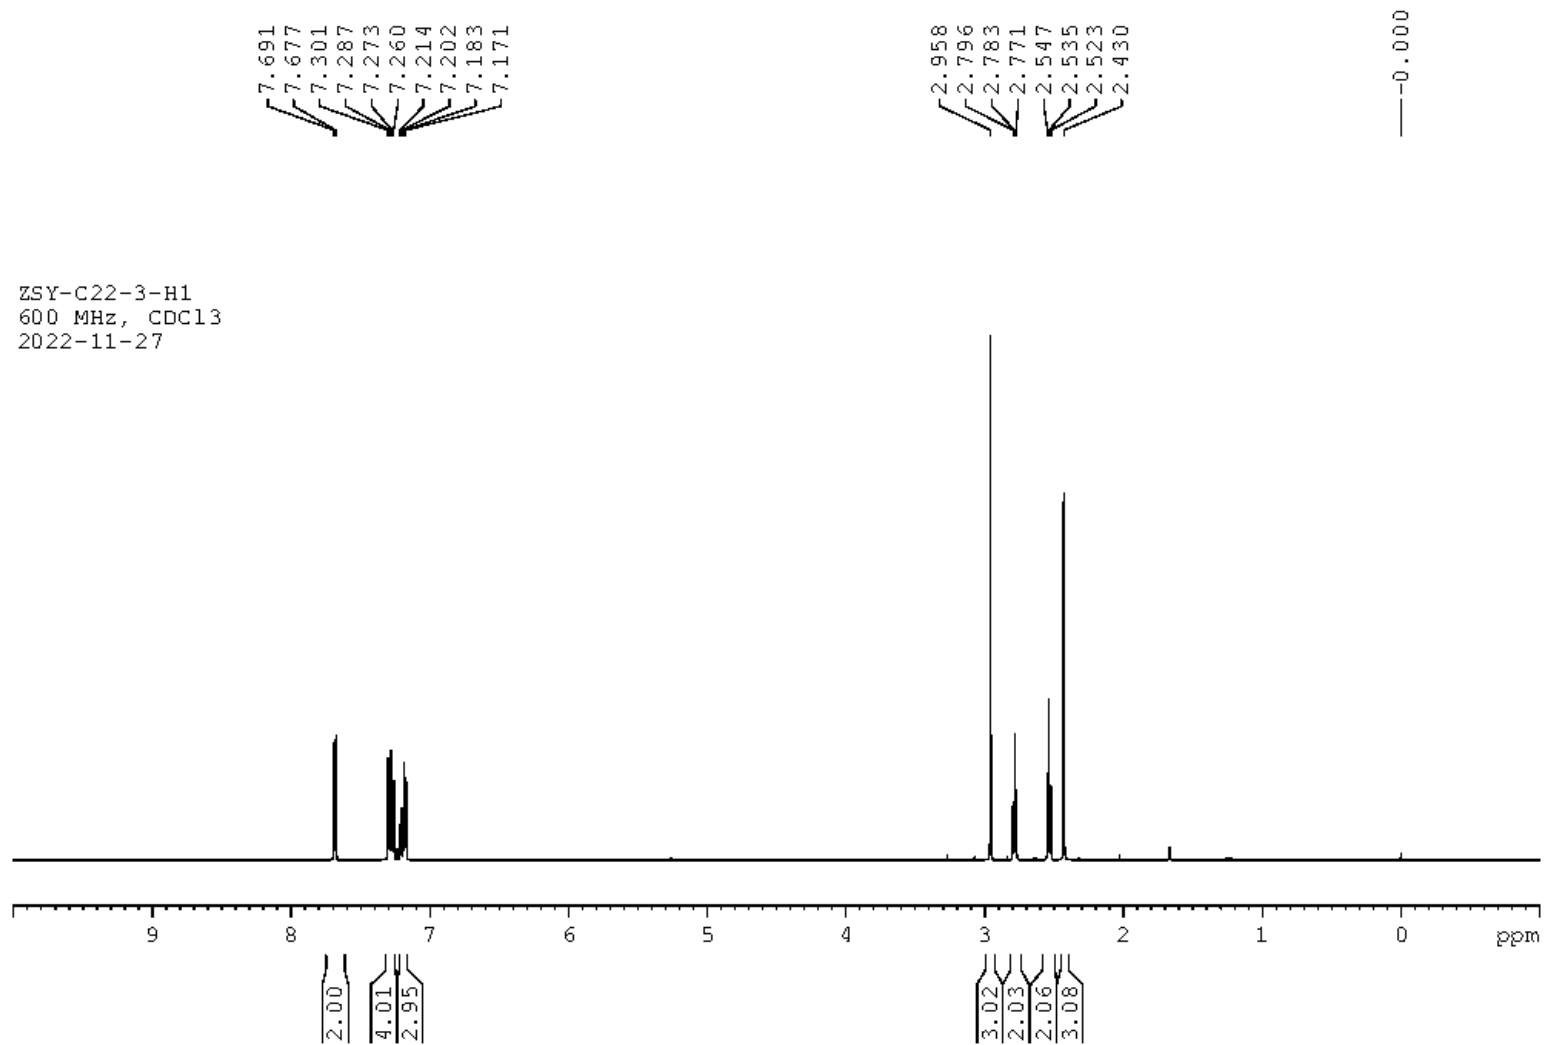

ZSY-C22-3-C13  
150 MHz, CDCl<sub>3</sub>  
2022-11-27

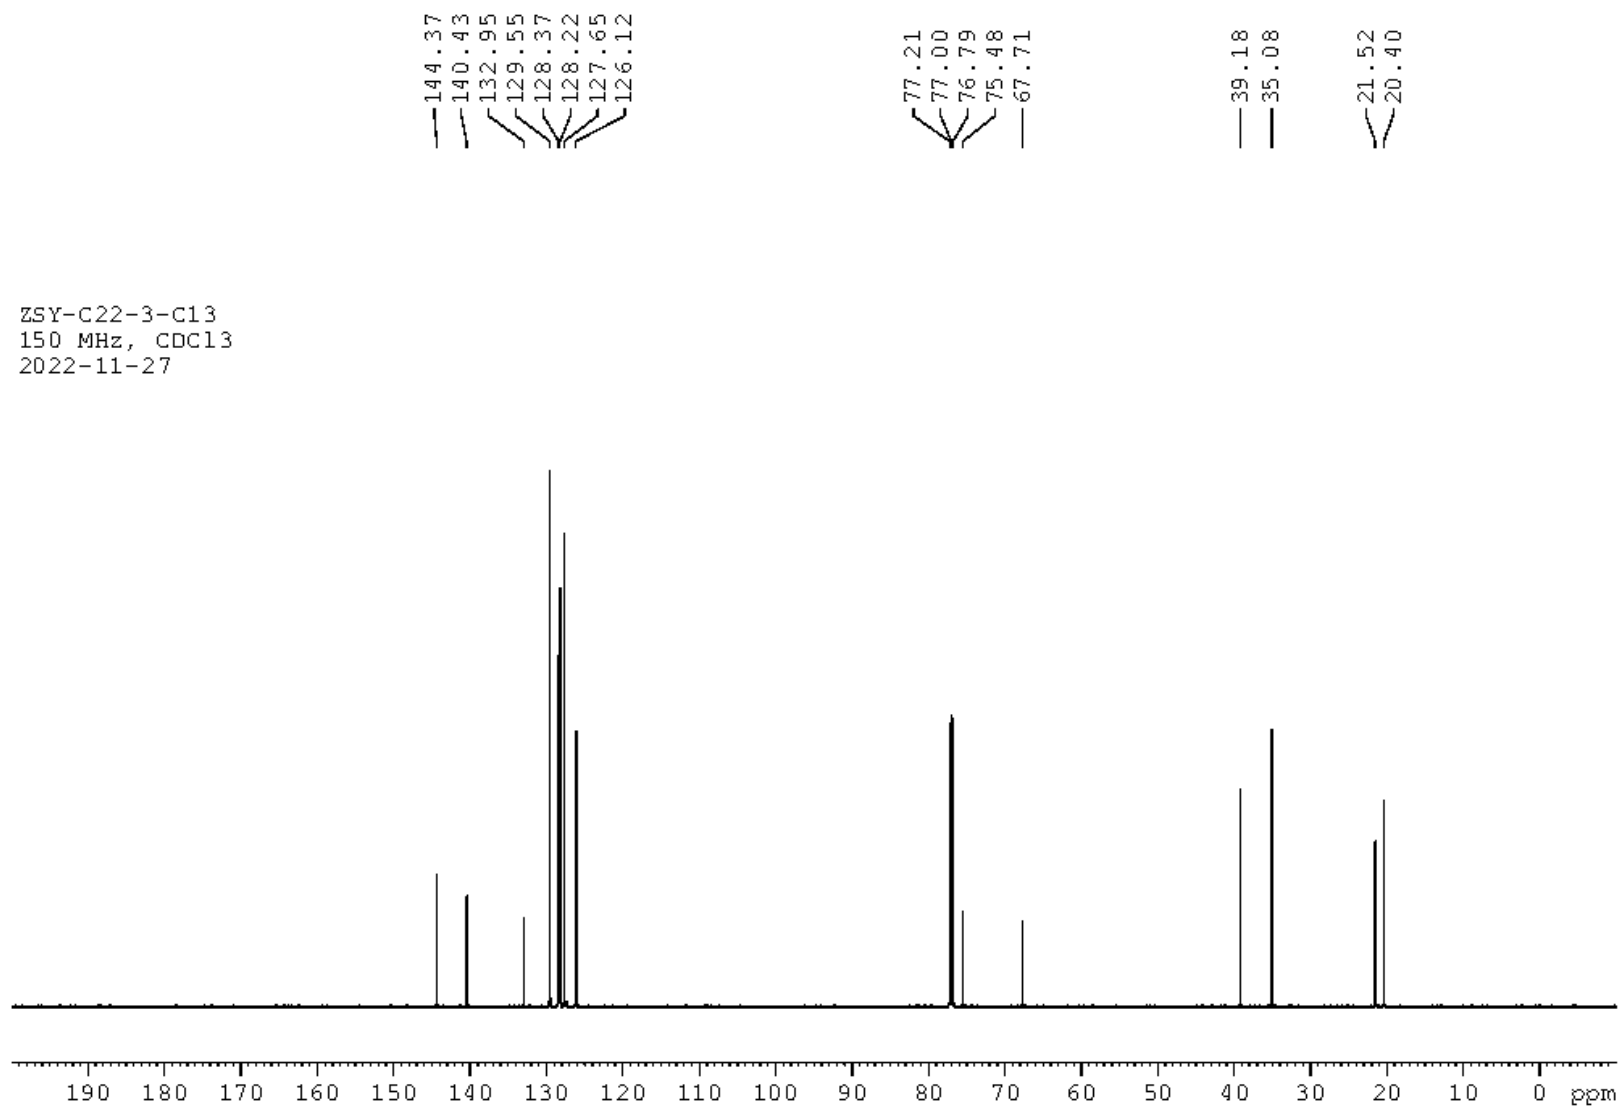

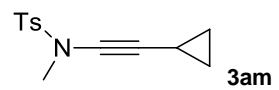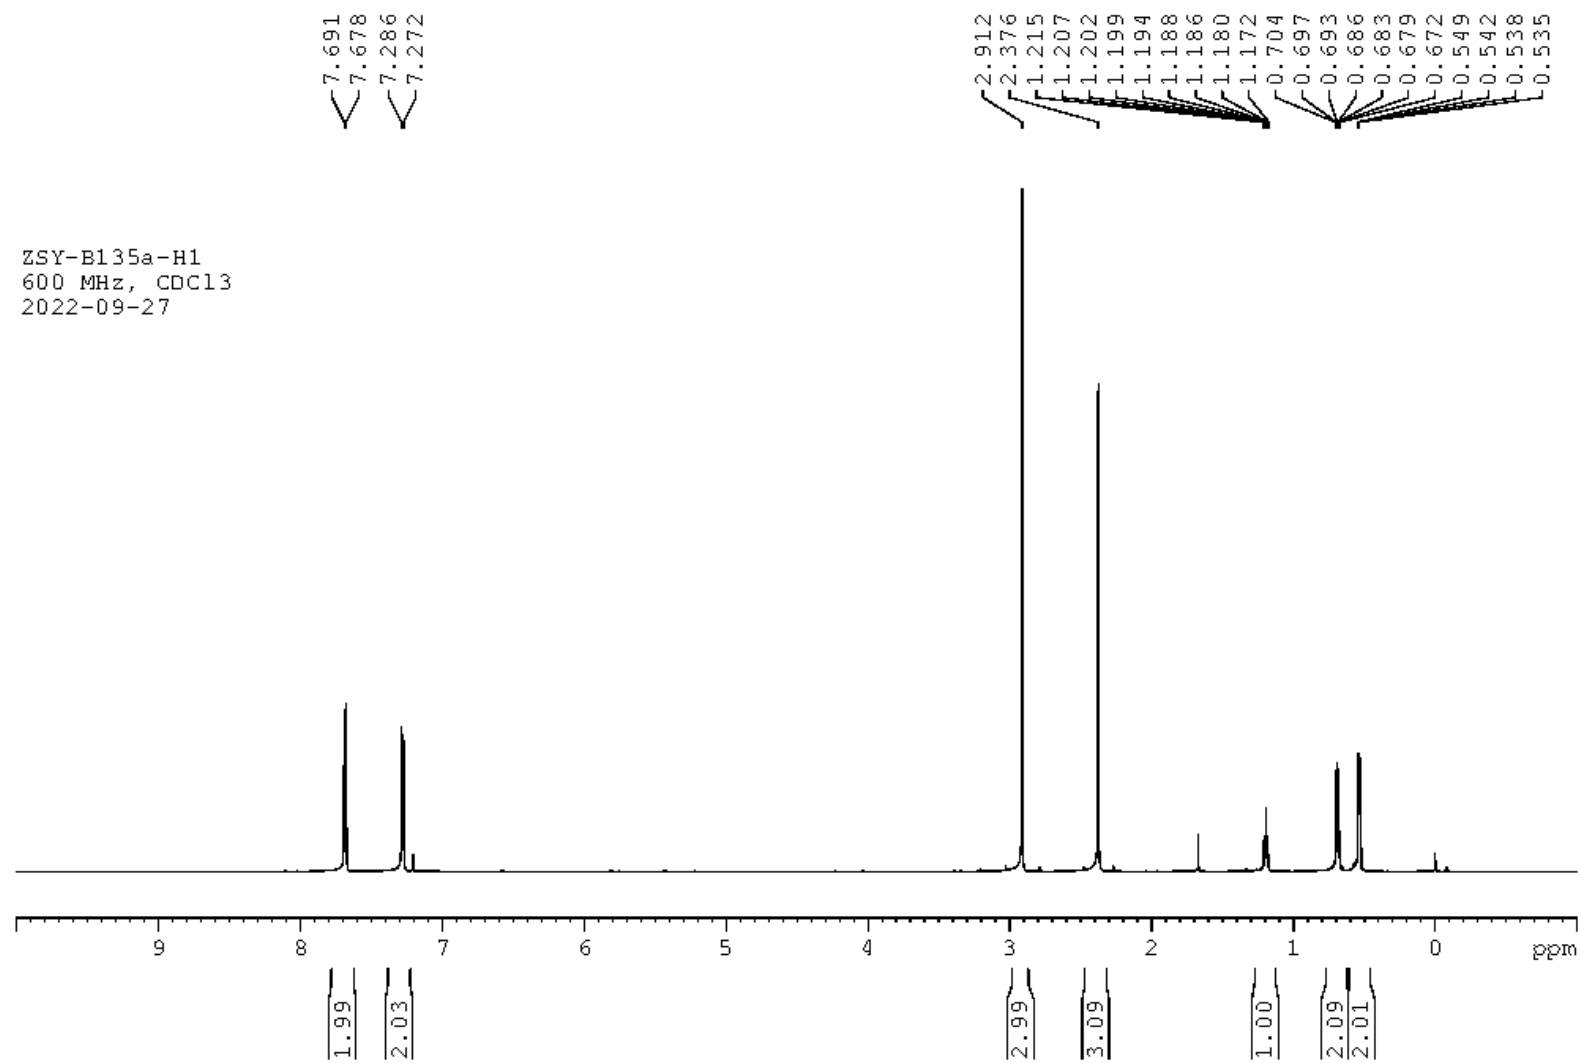

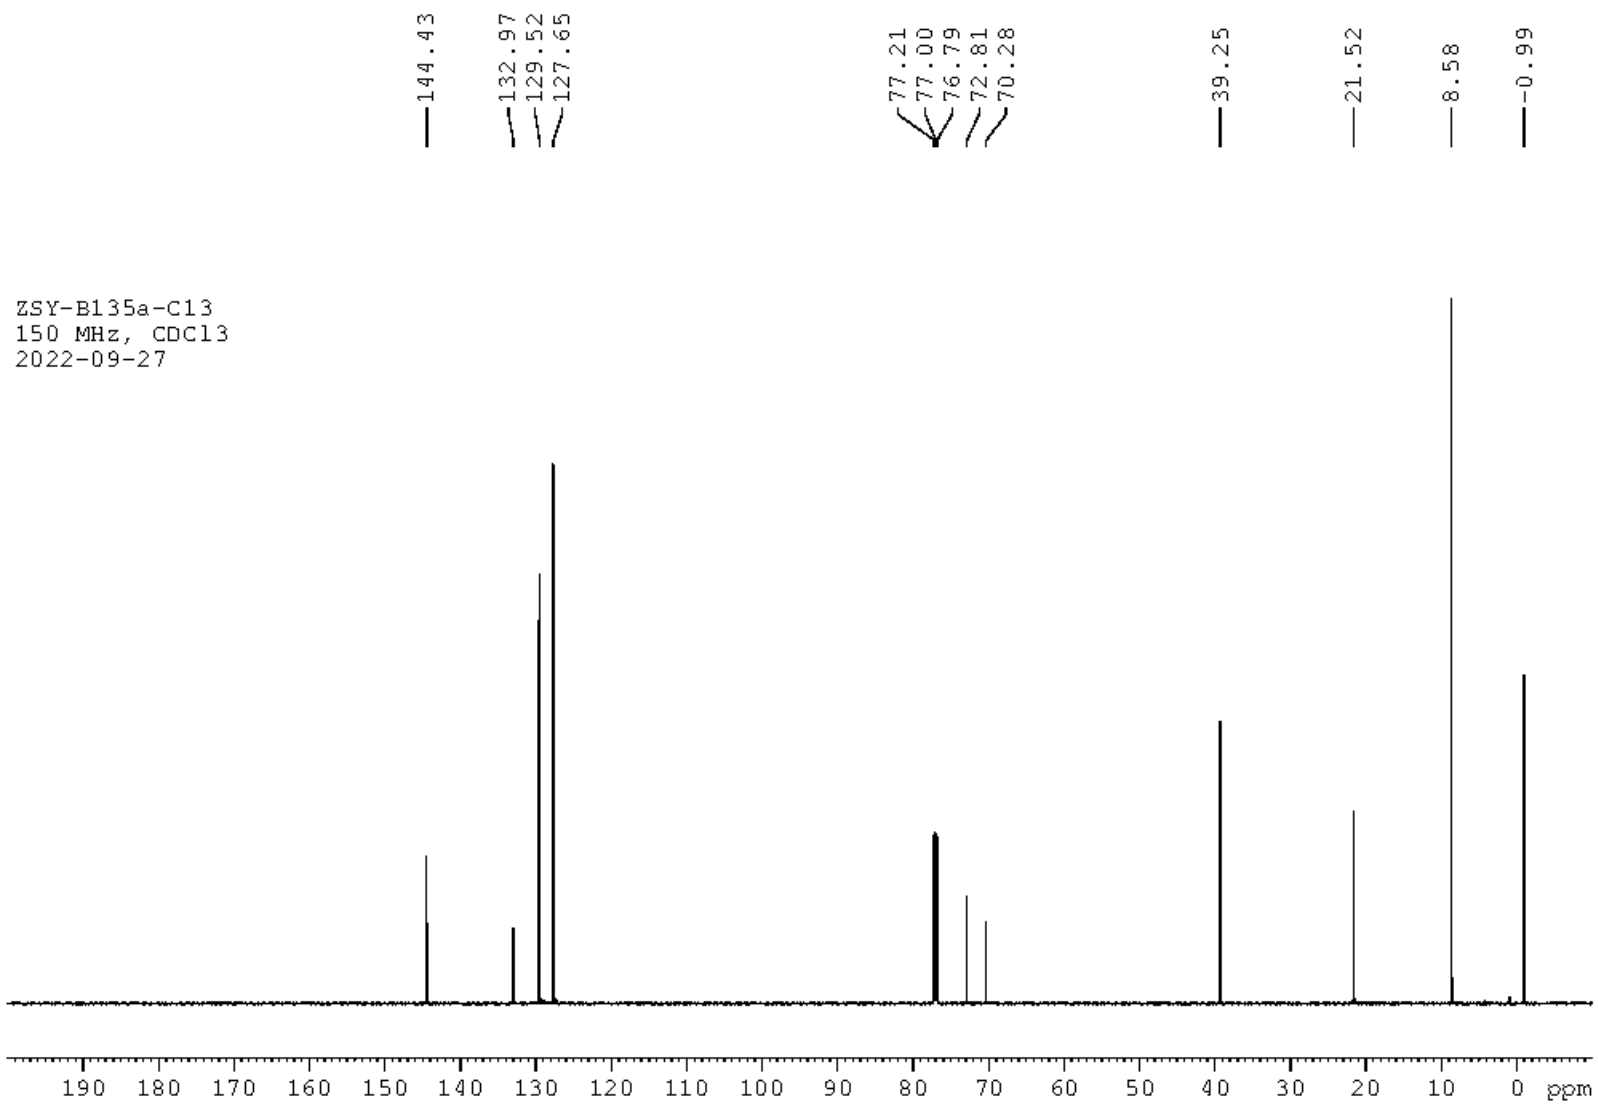

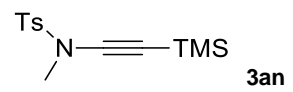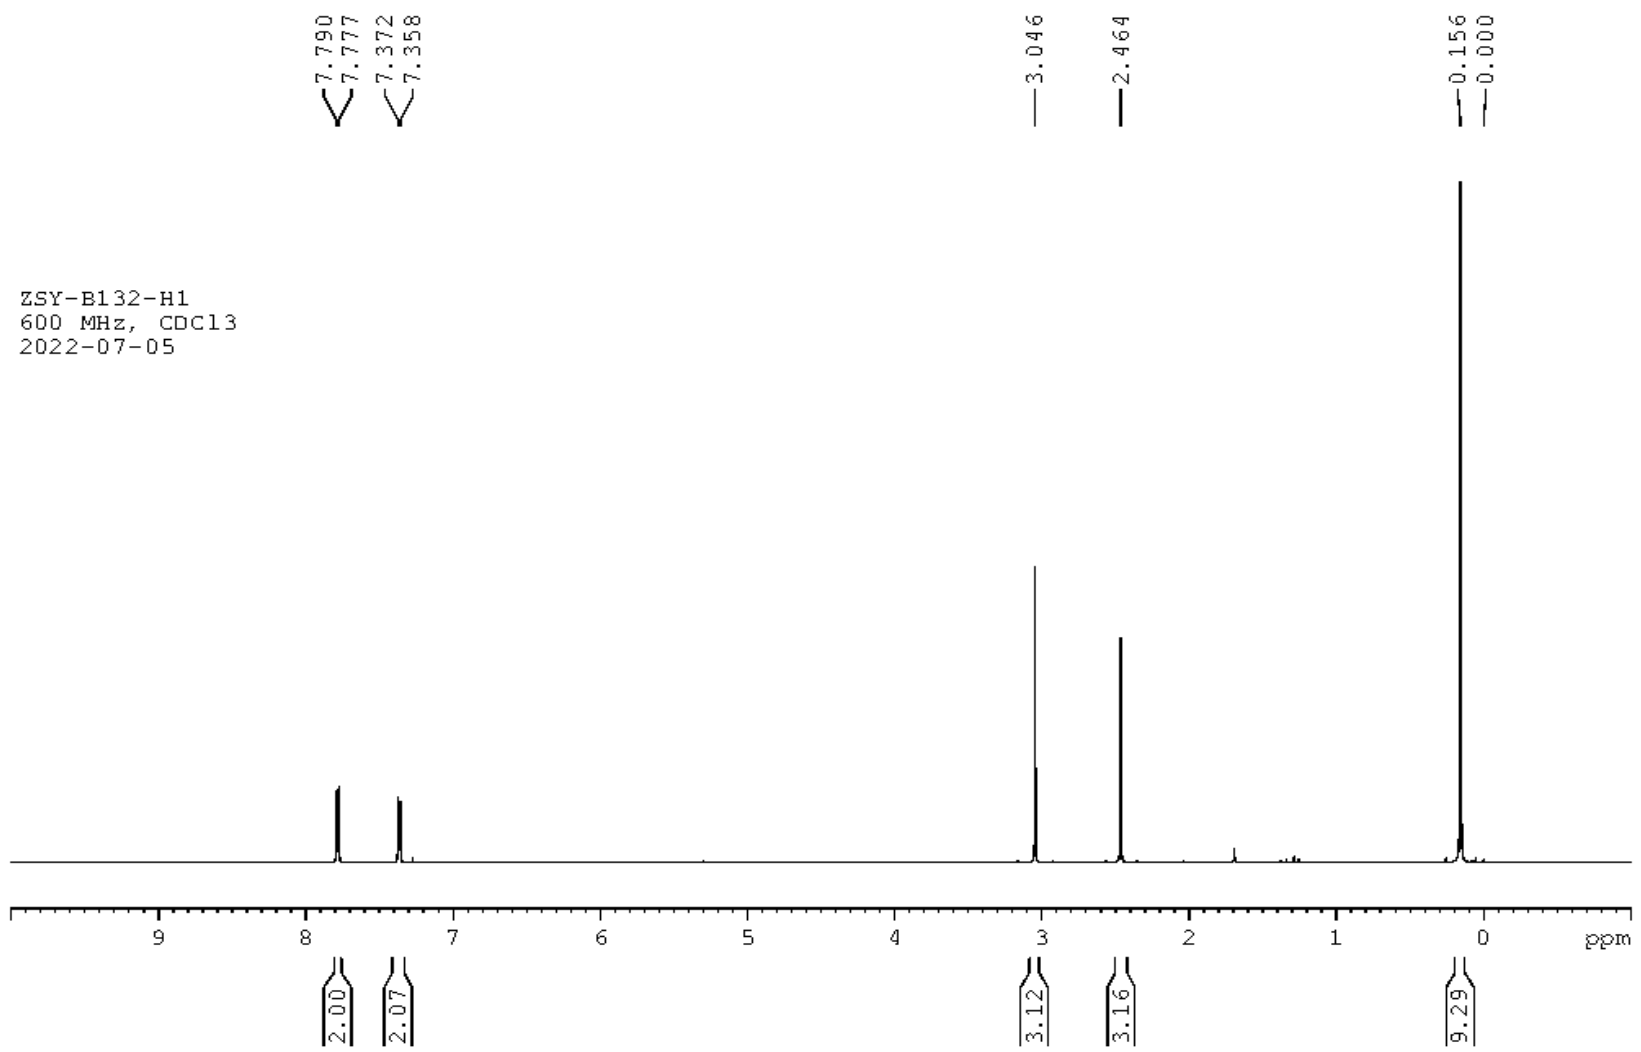



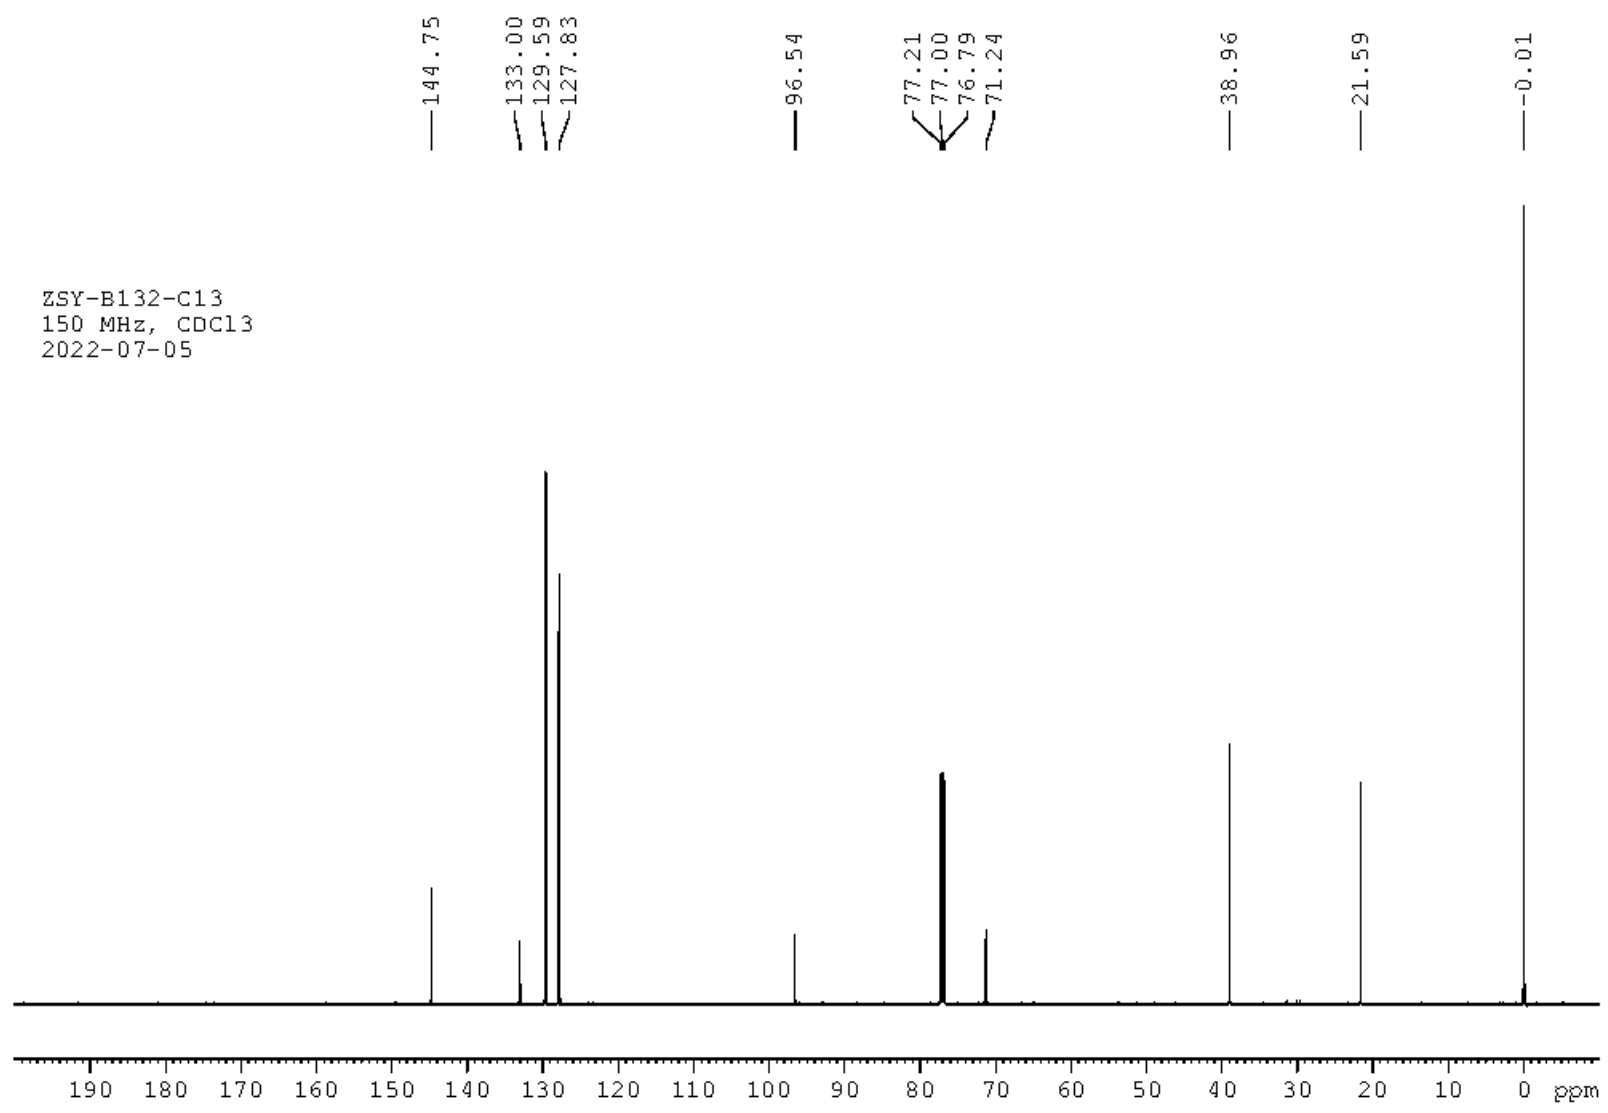

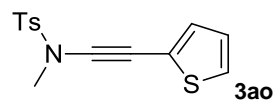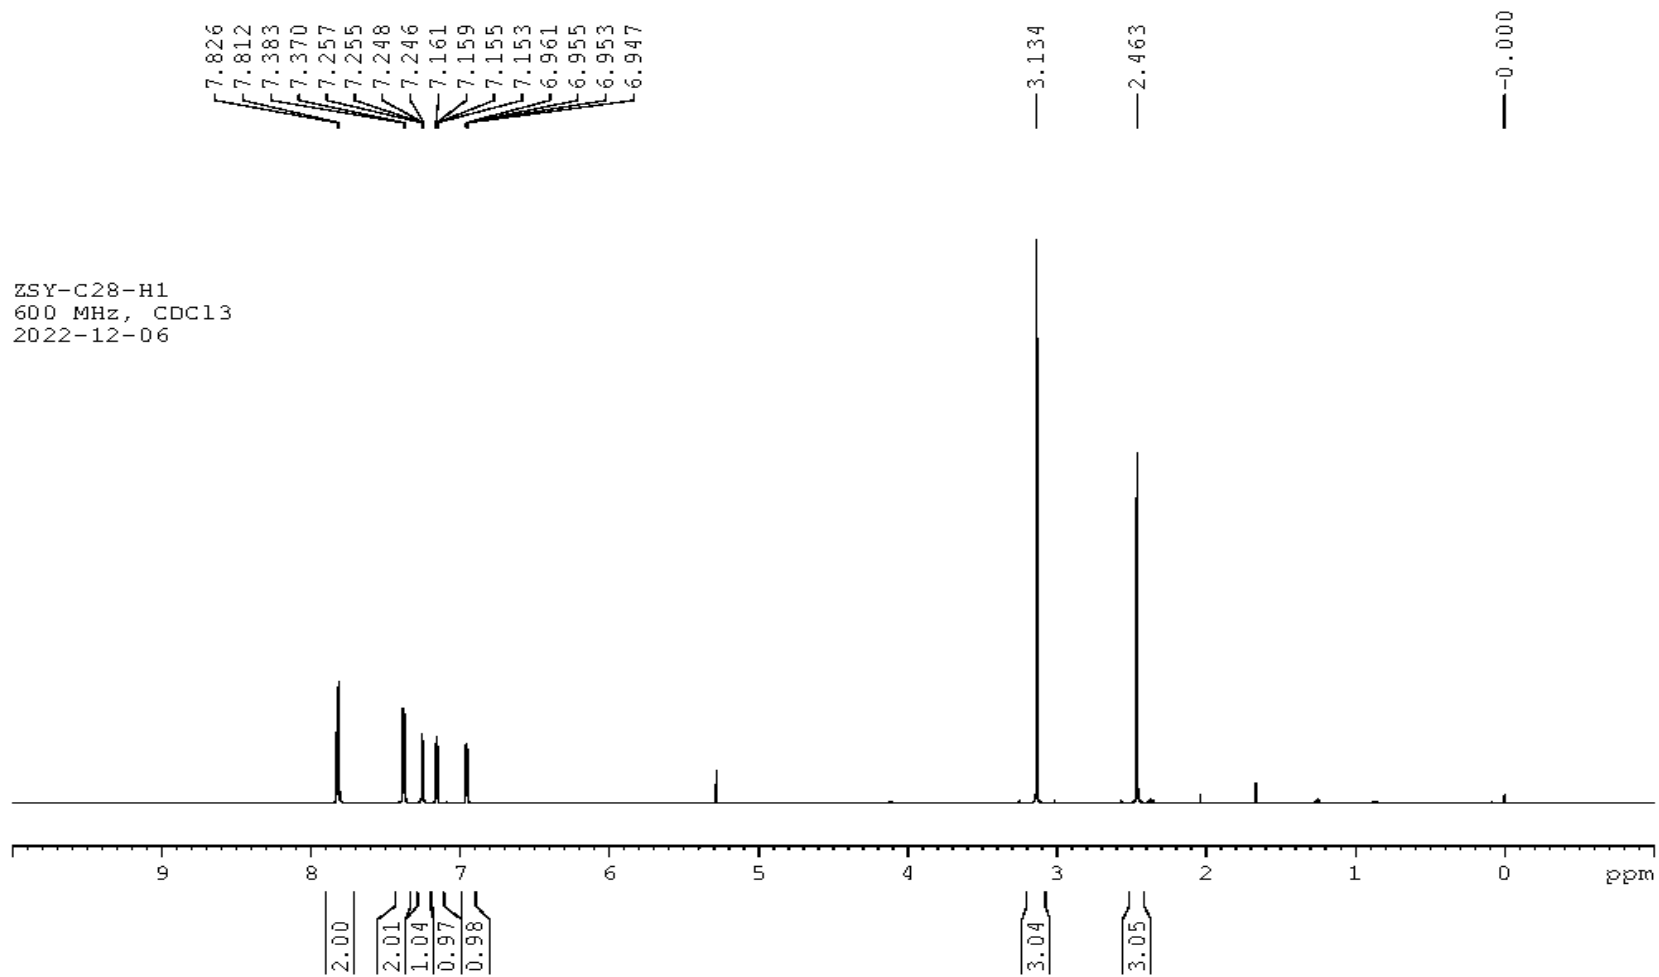

ZSY-C28-C13  
150 MHz, CDCl<sub>3</sub>  
2022-12-06

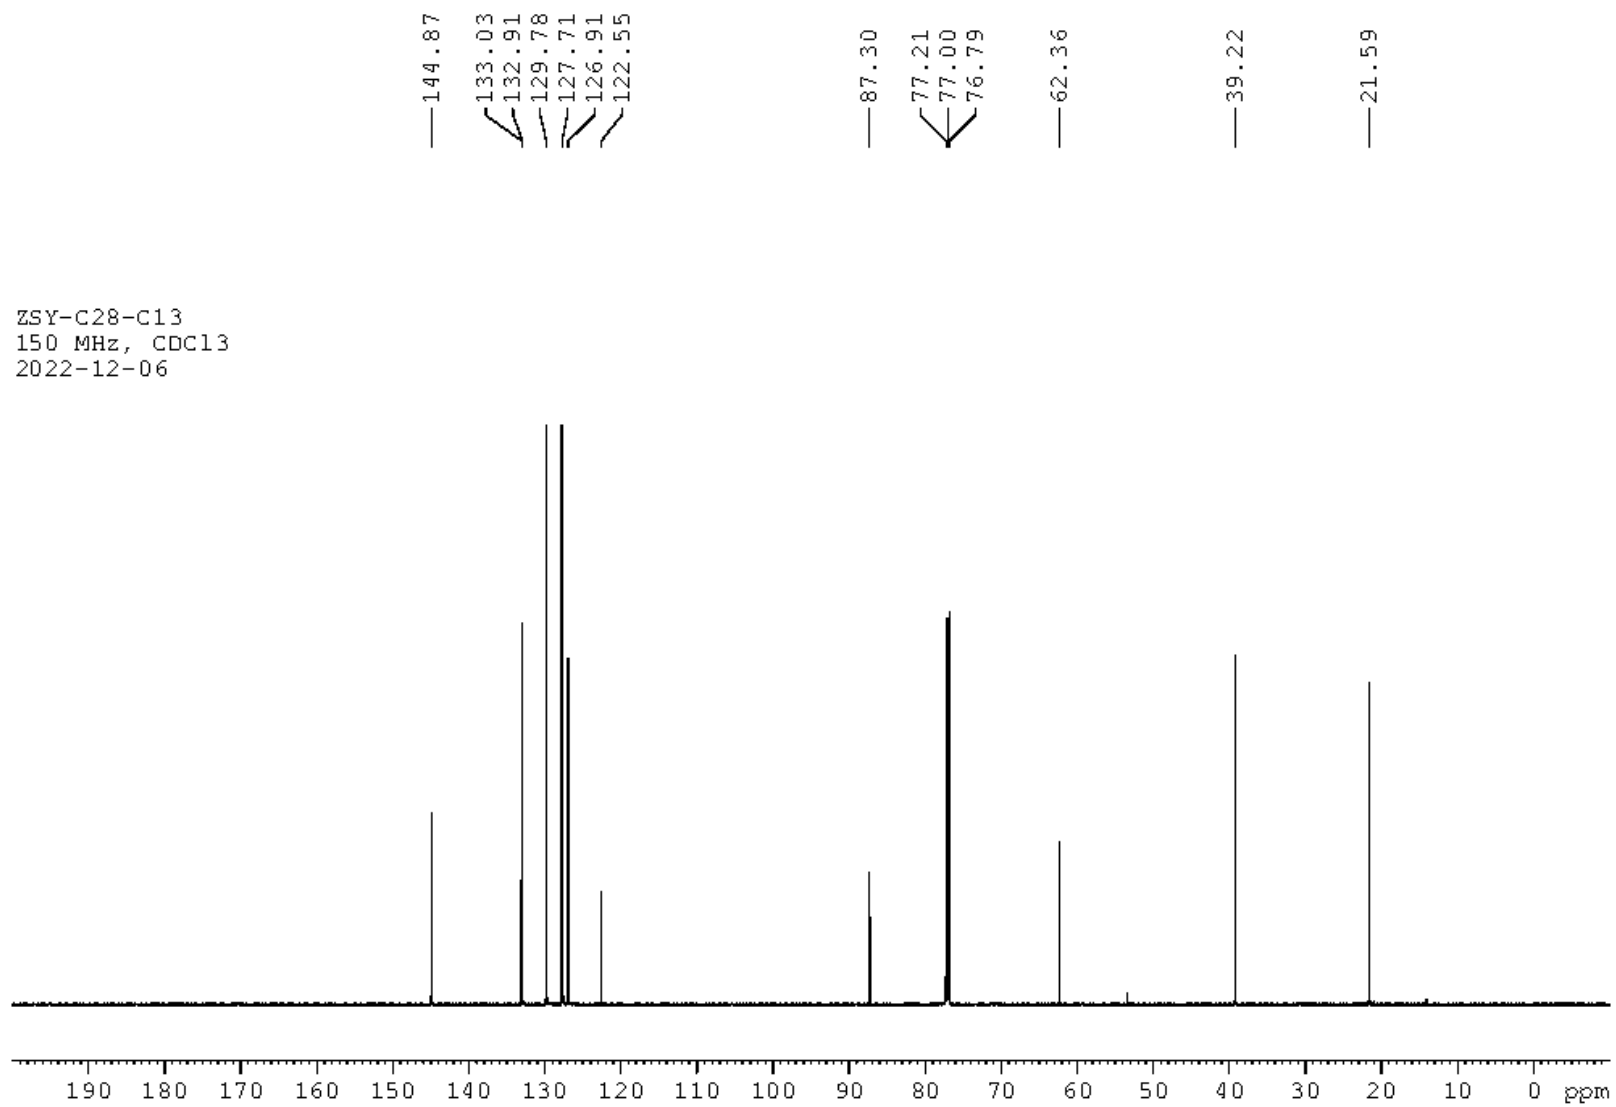

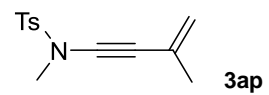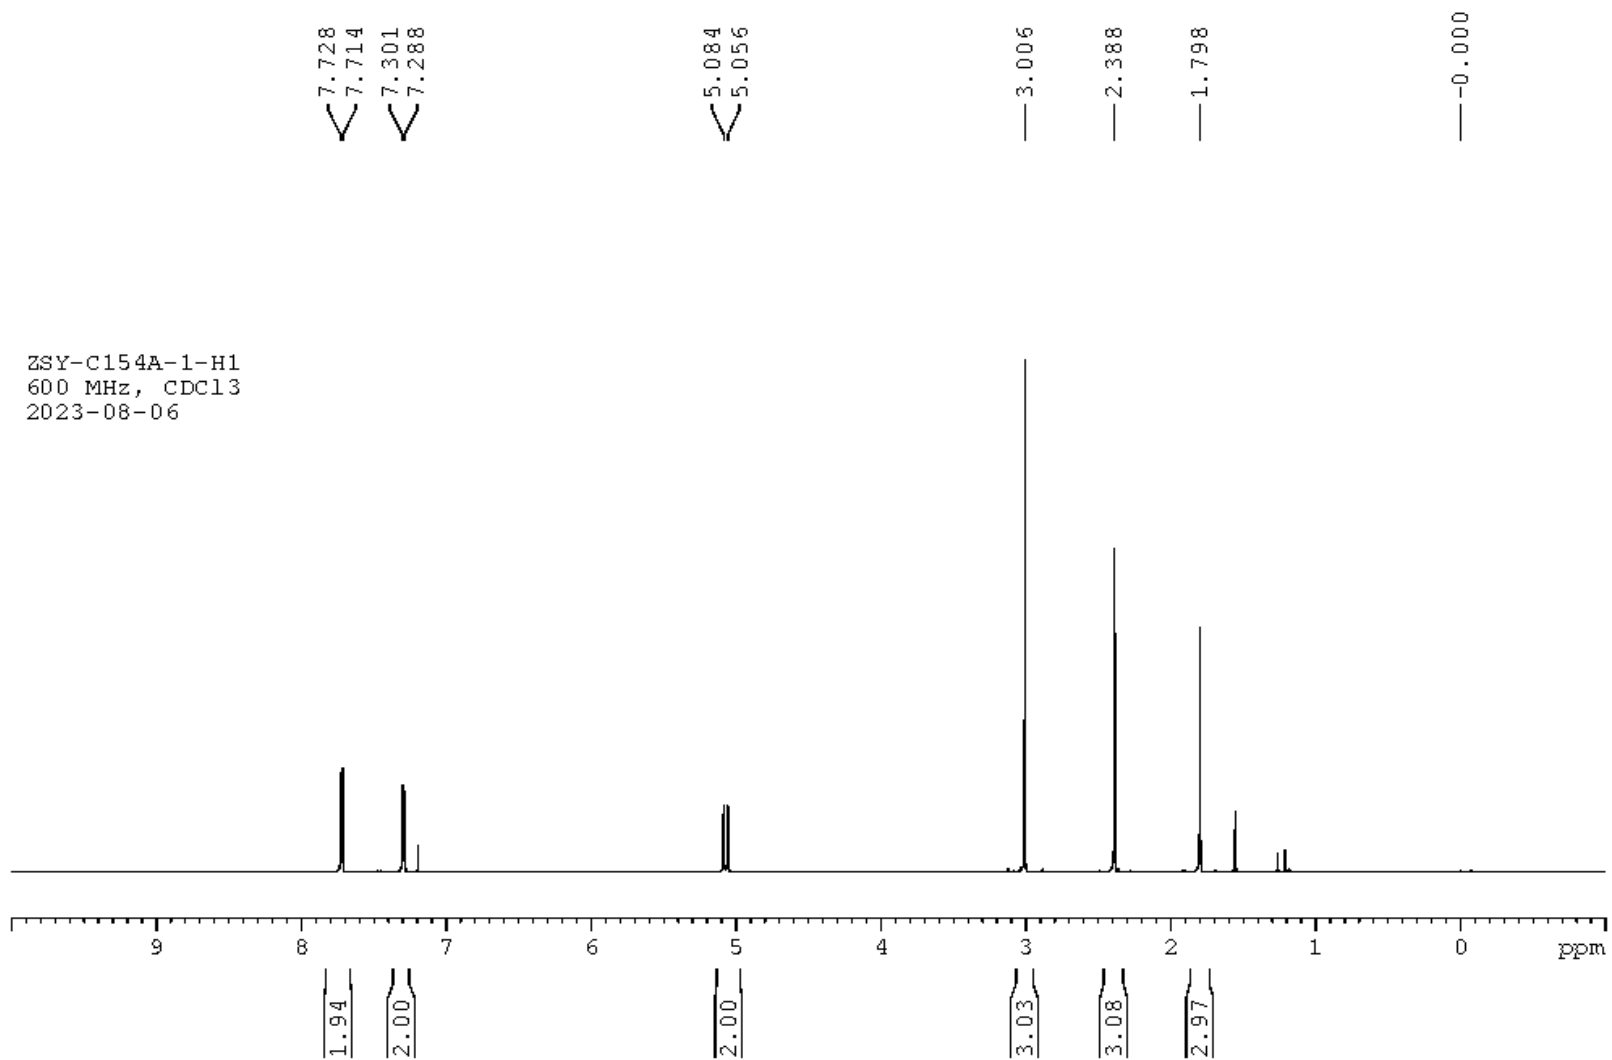

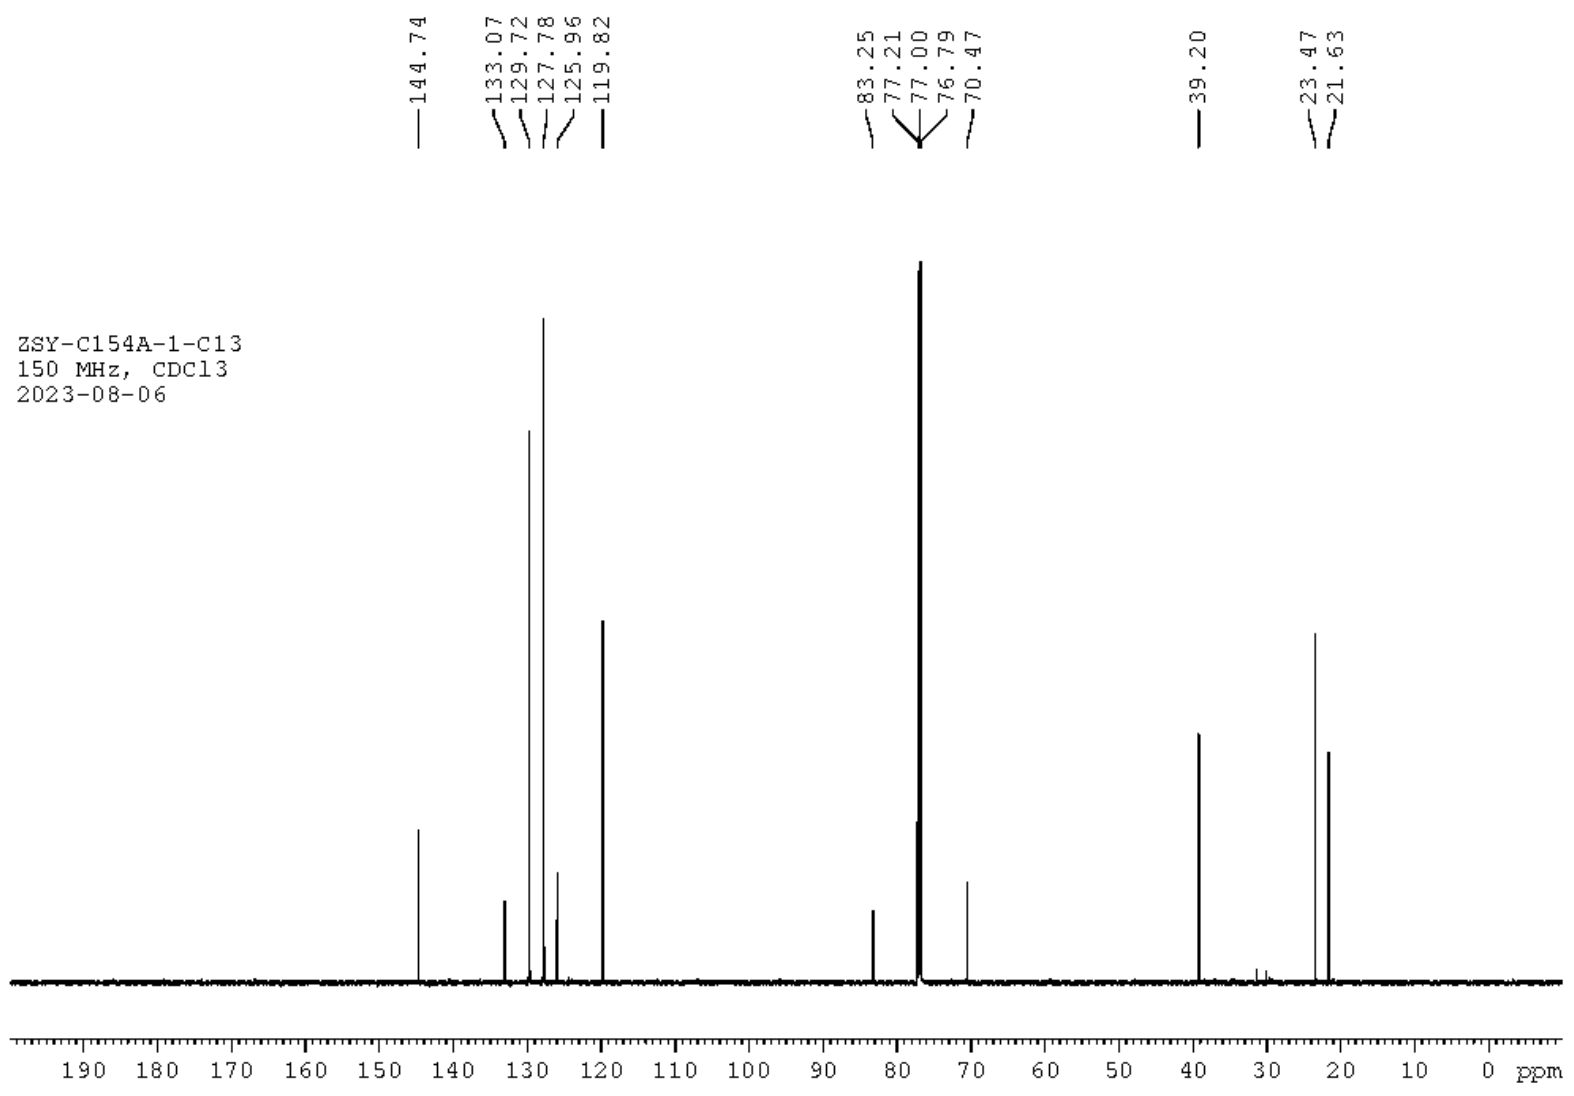

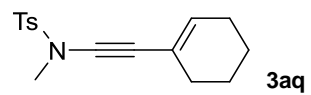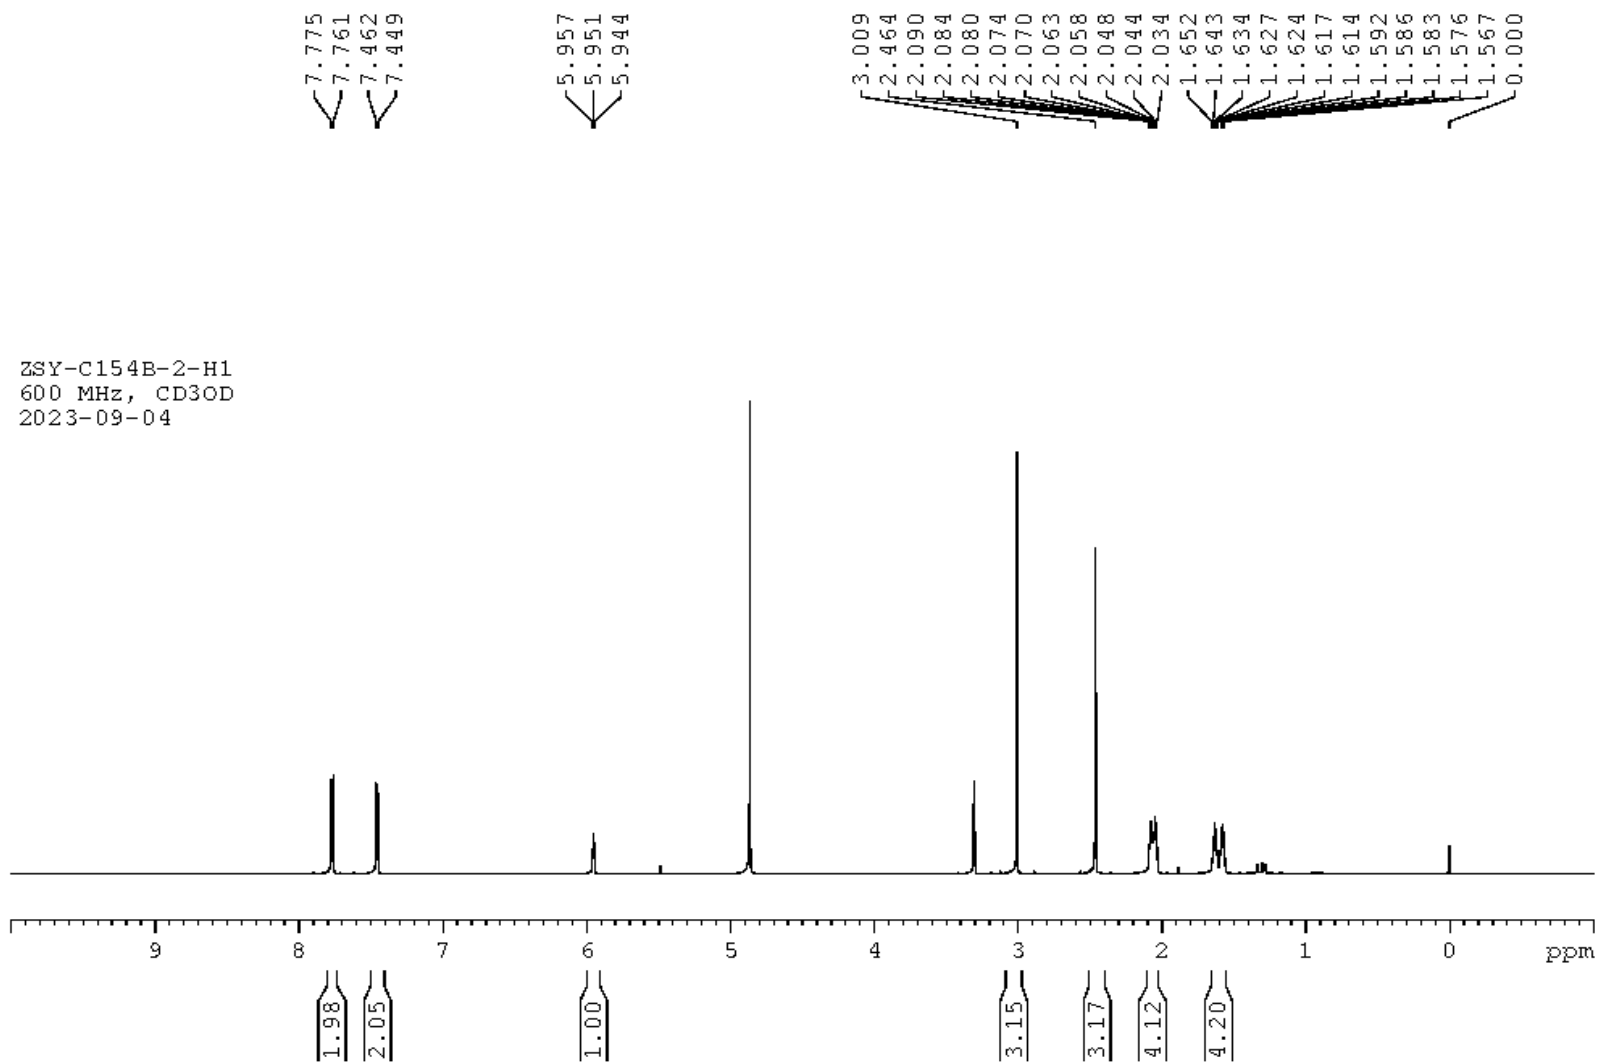

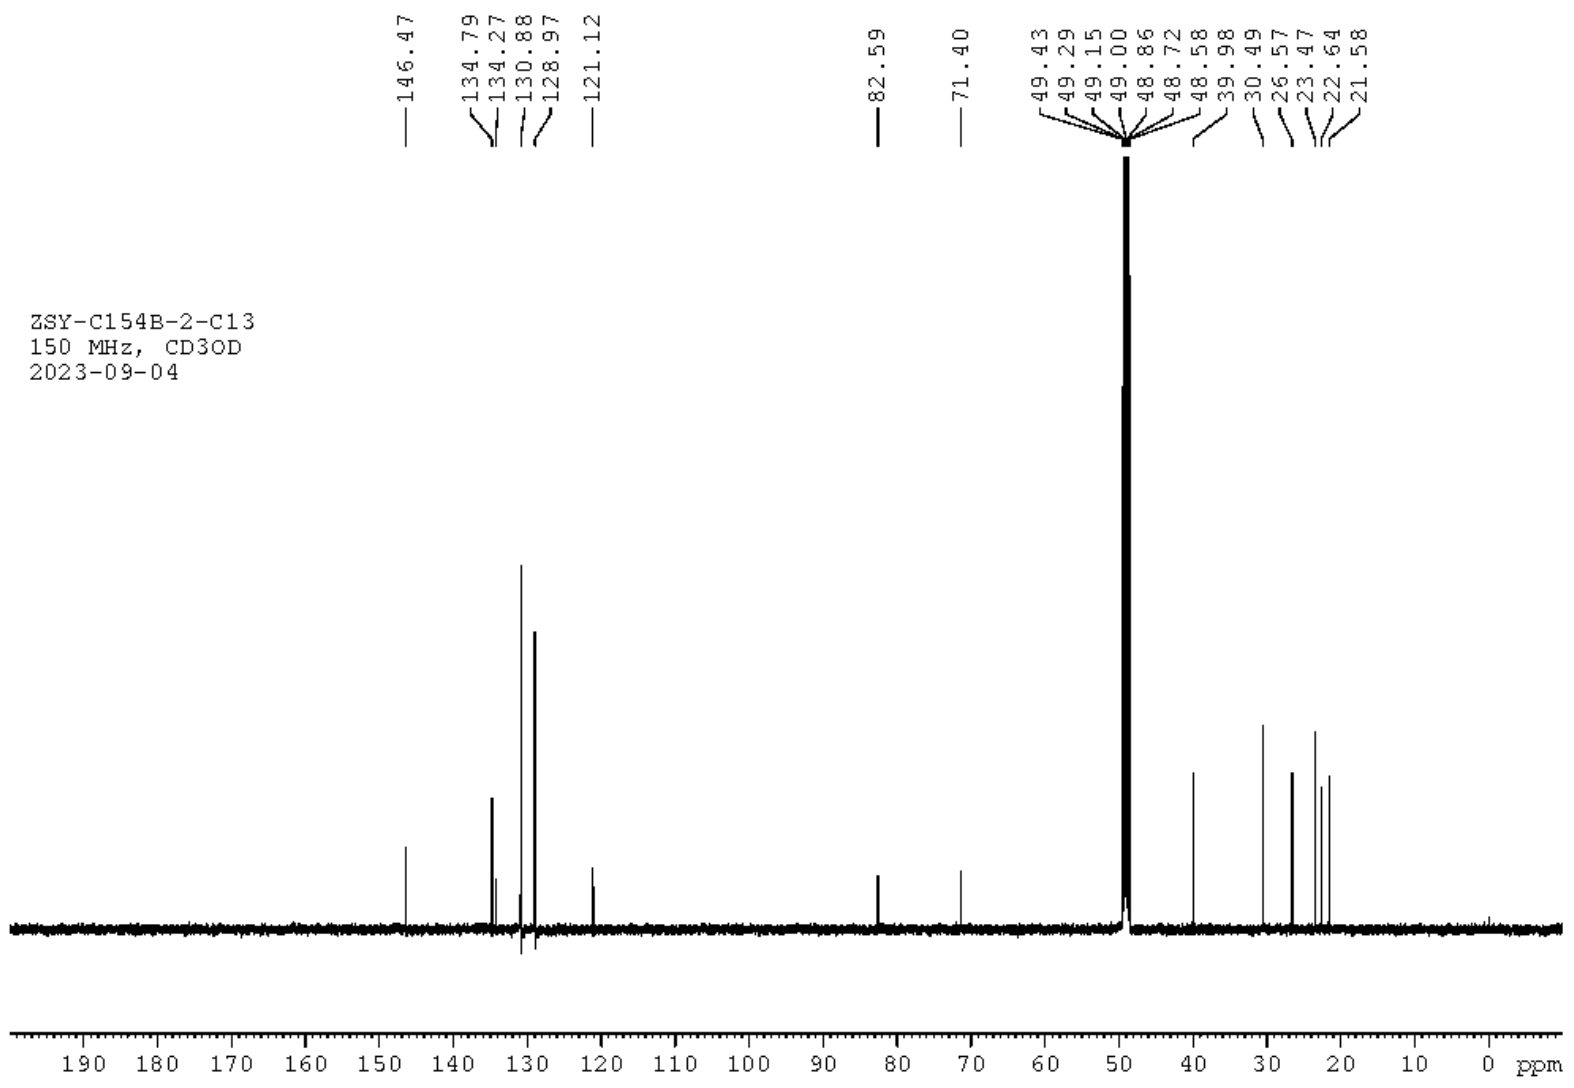

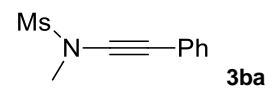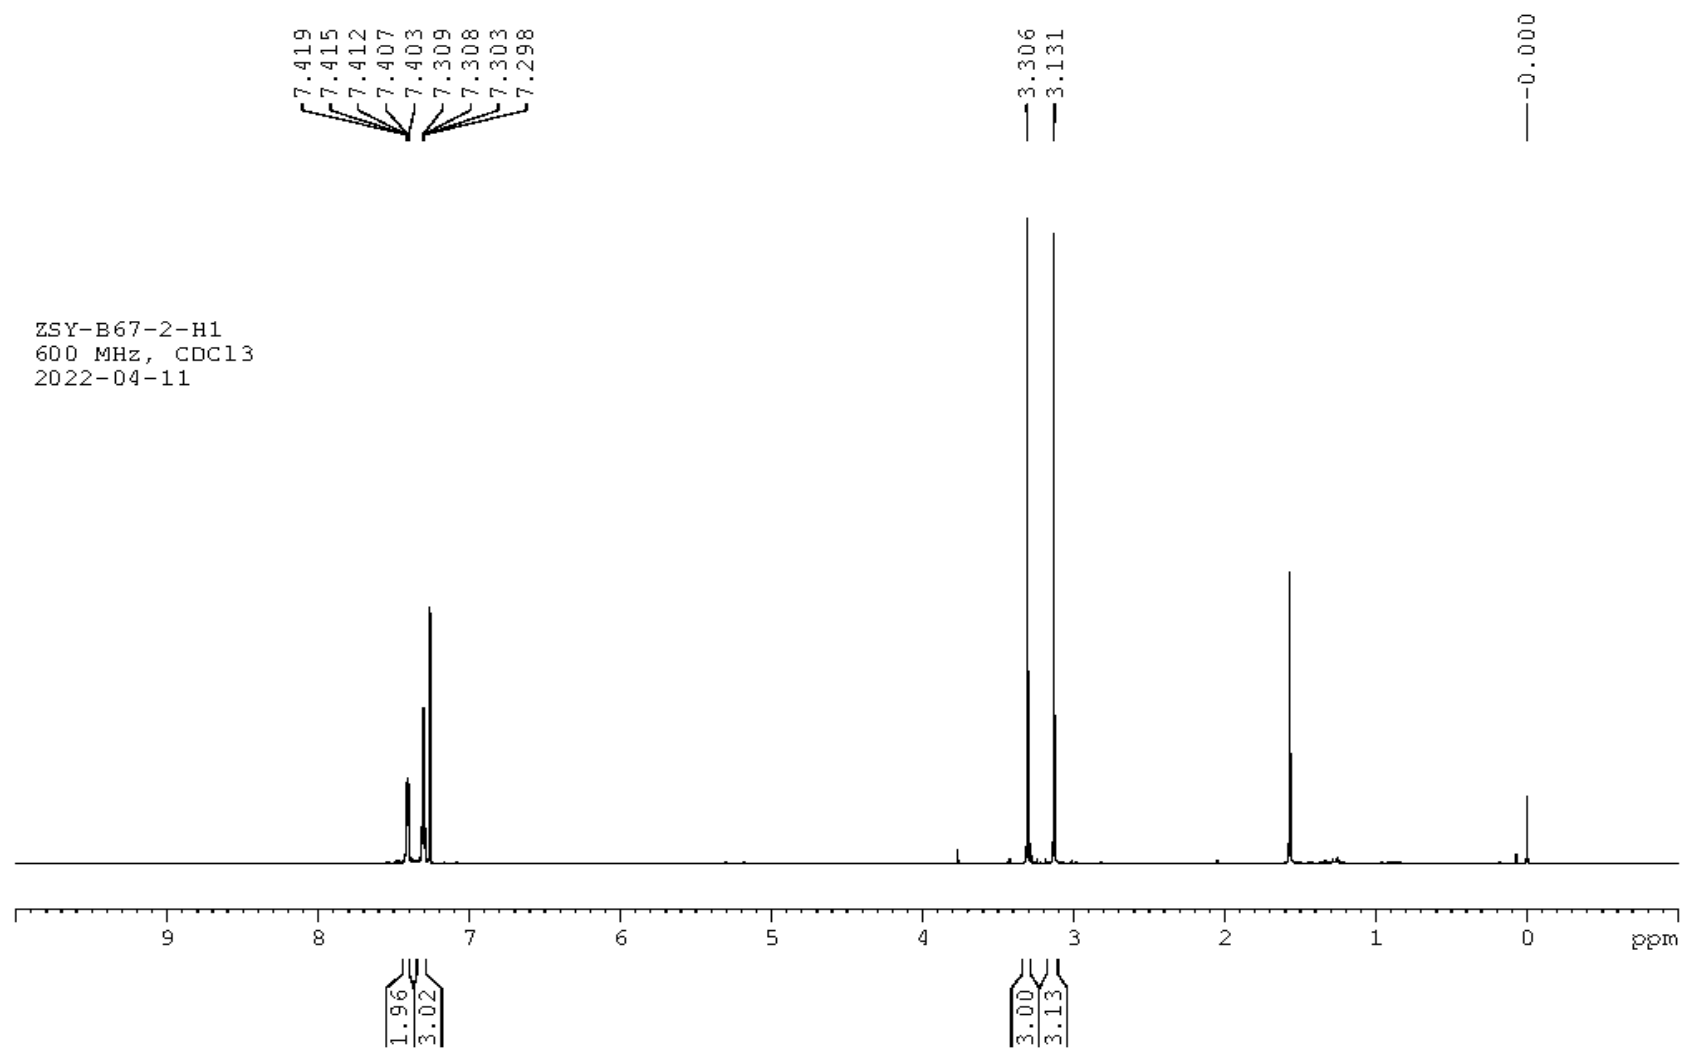



ZSY-B67-2-C13  
150 MHz, CDCl<sub>3</sub>  
2022-04-11

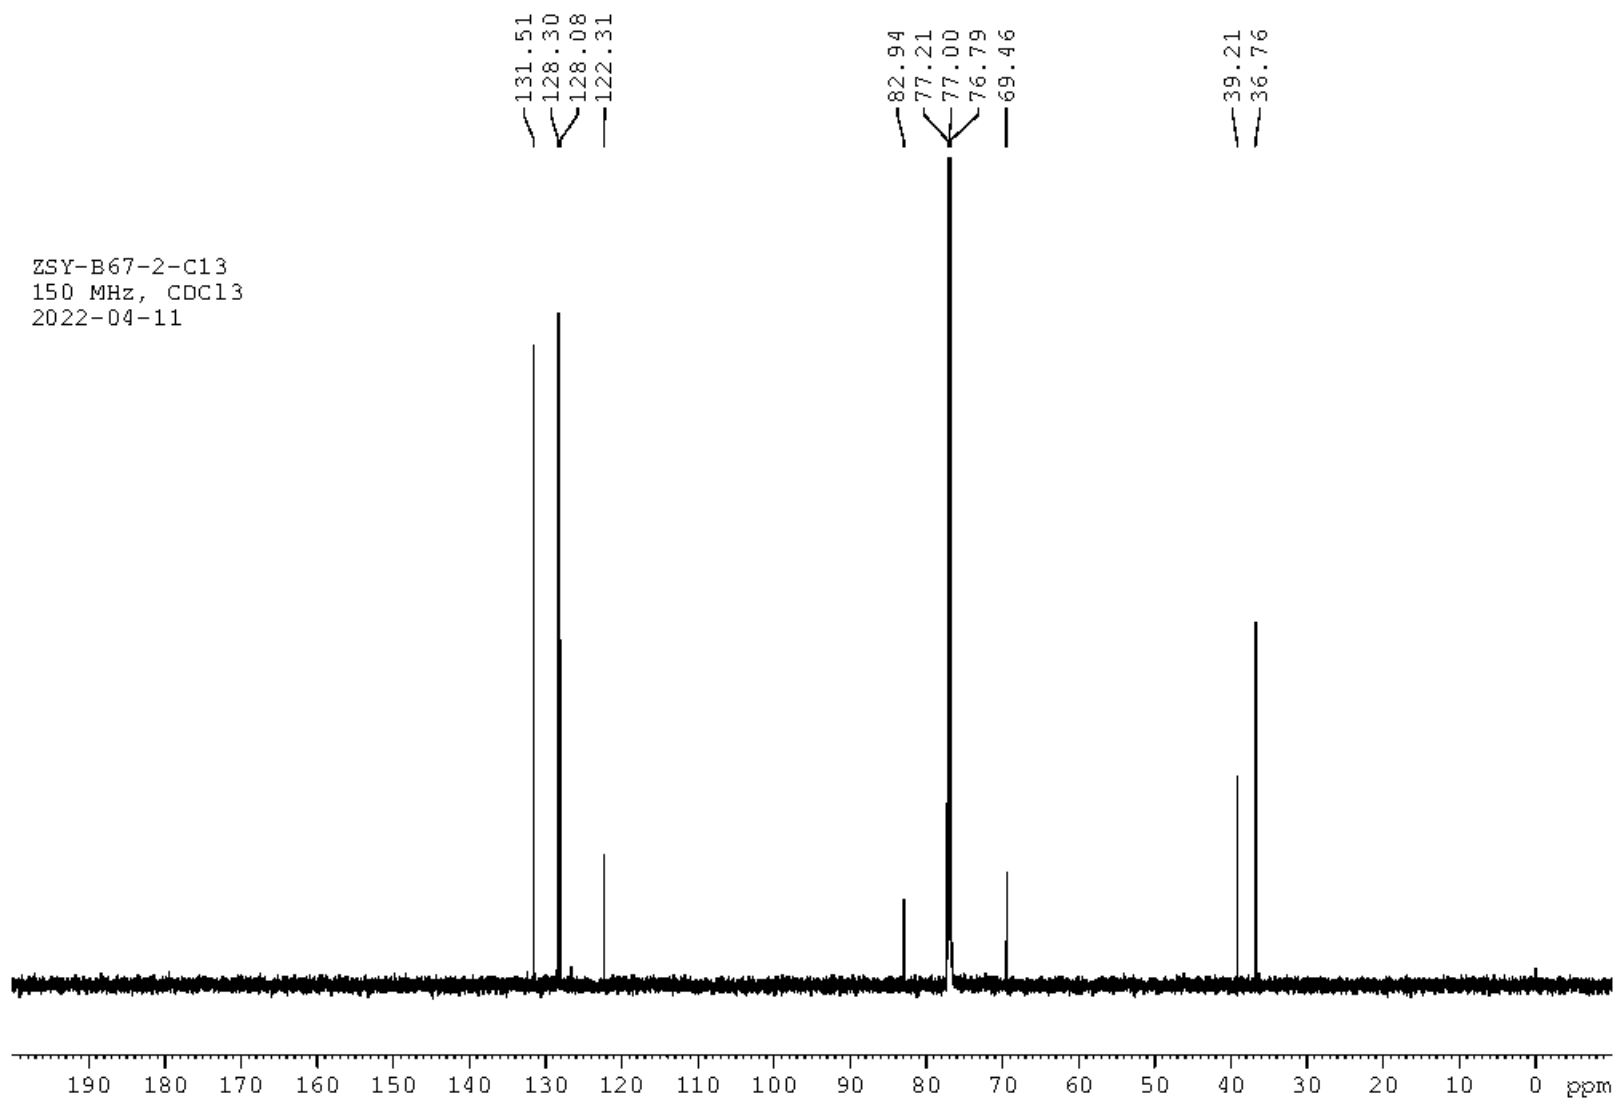

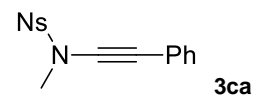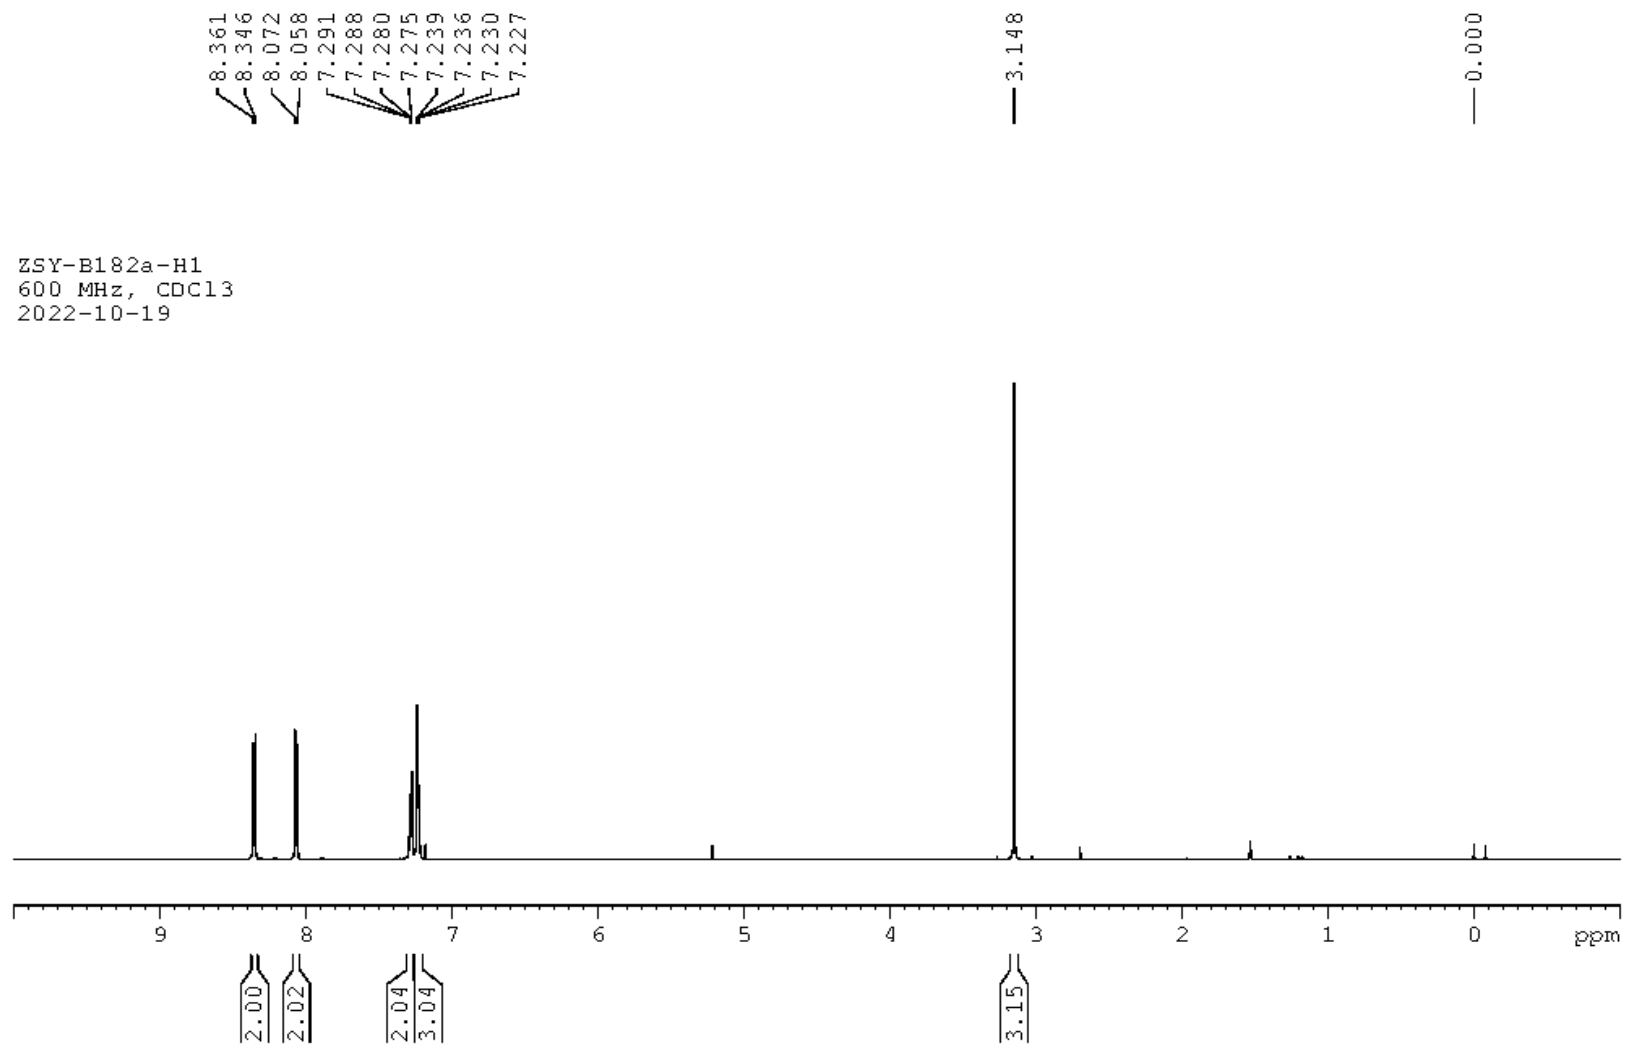

ZSY-B182a-C13  
150 MHz, CDCl<sub>3</sub>  
2022-10-19

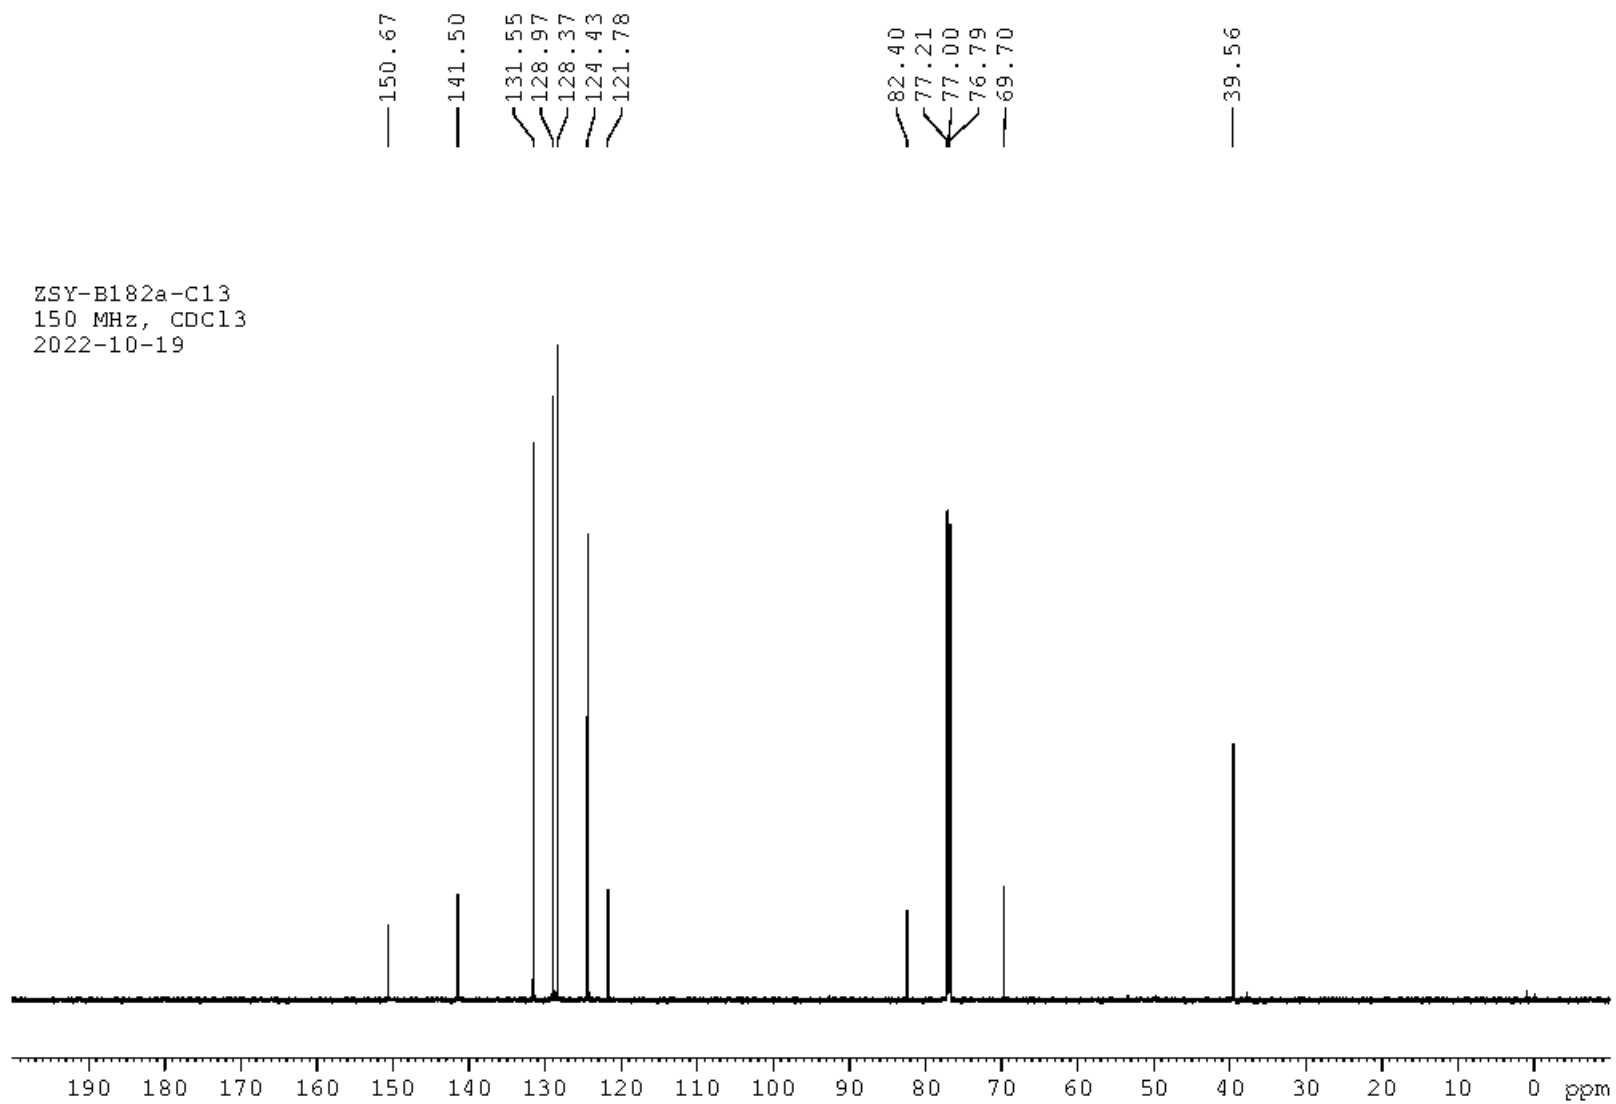

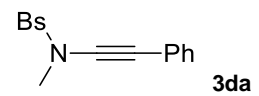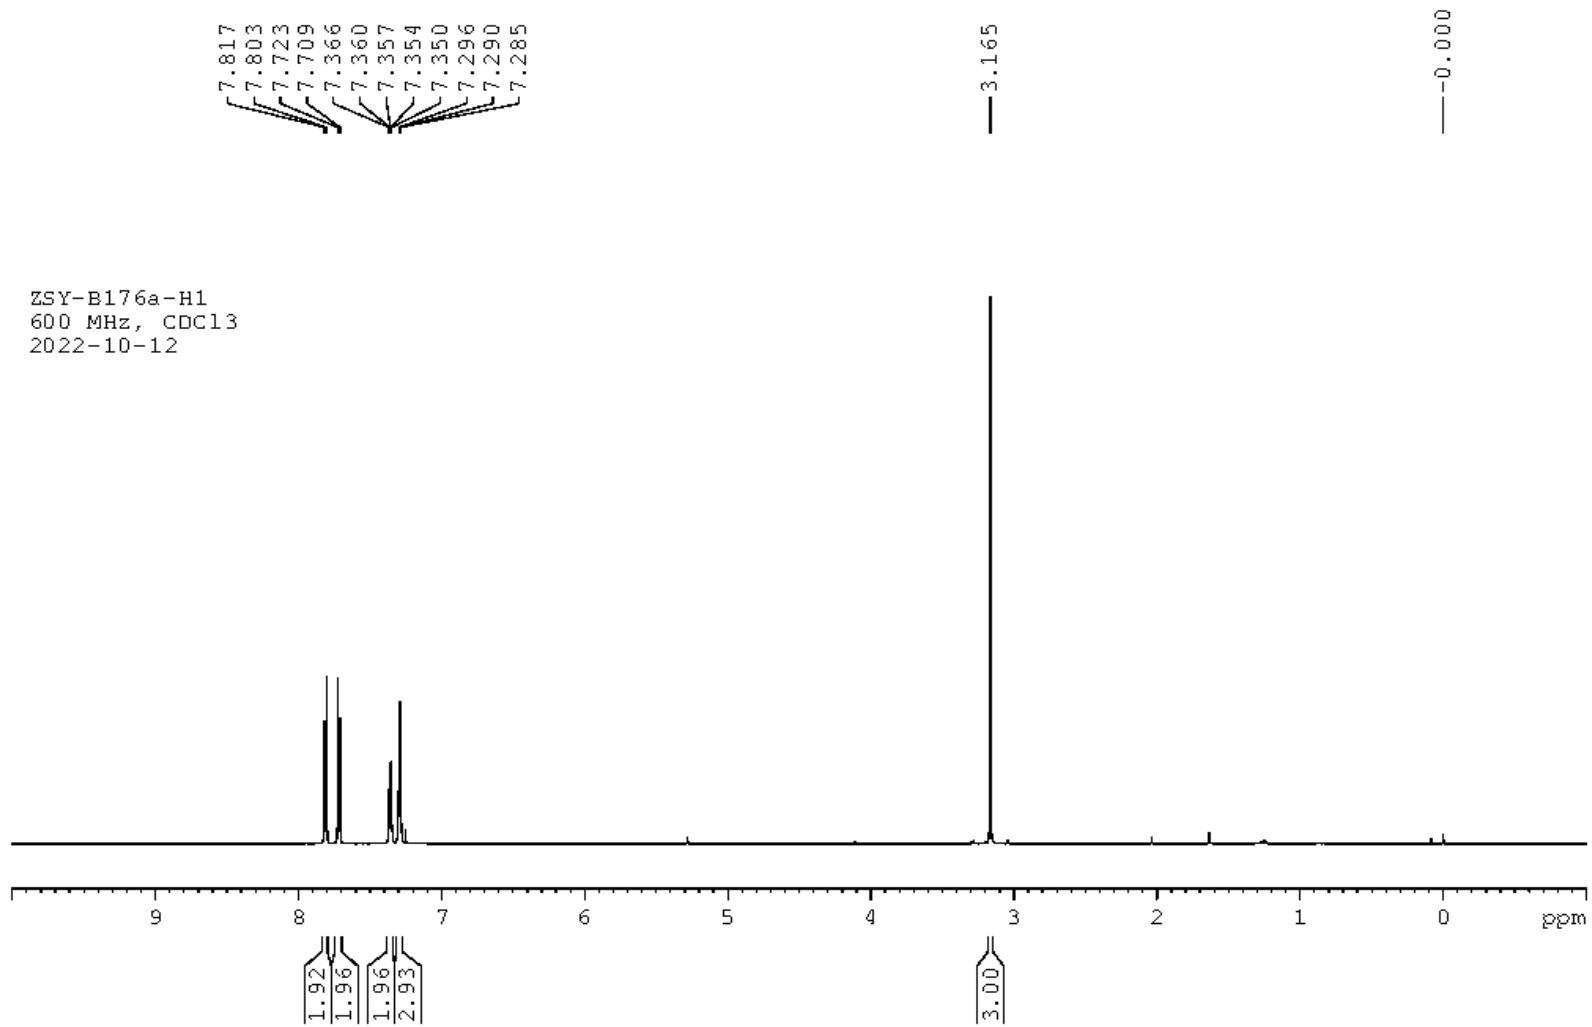

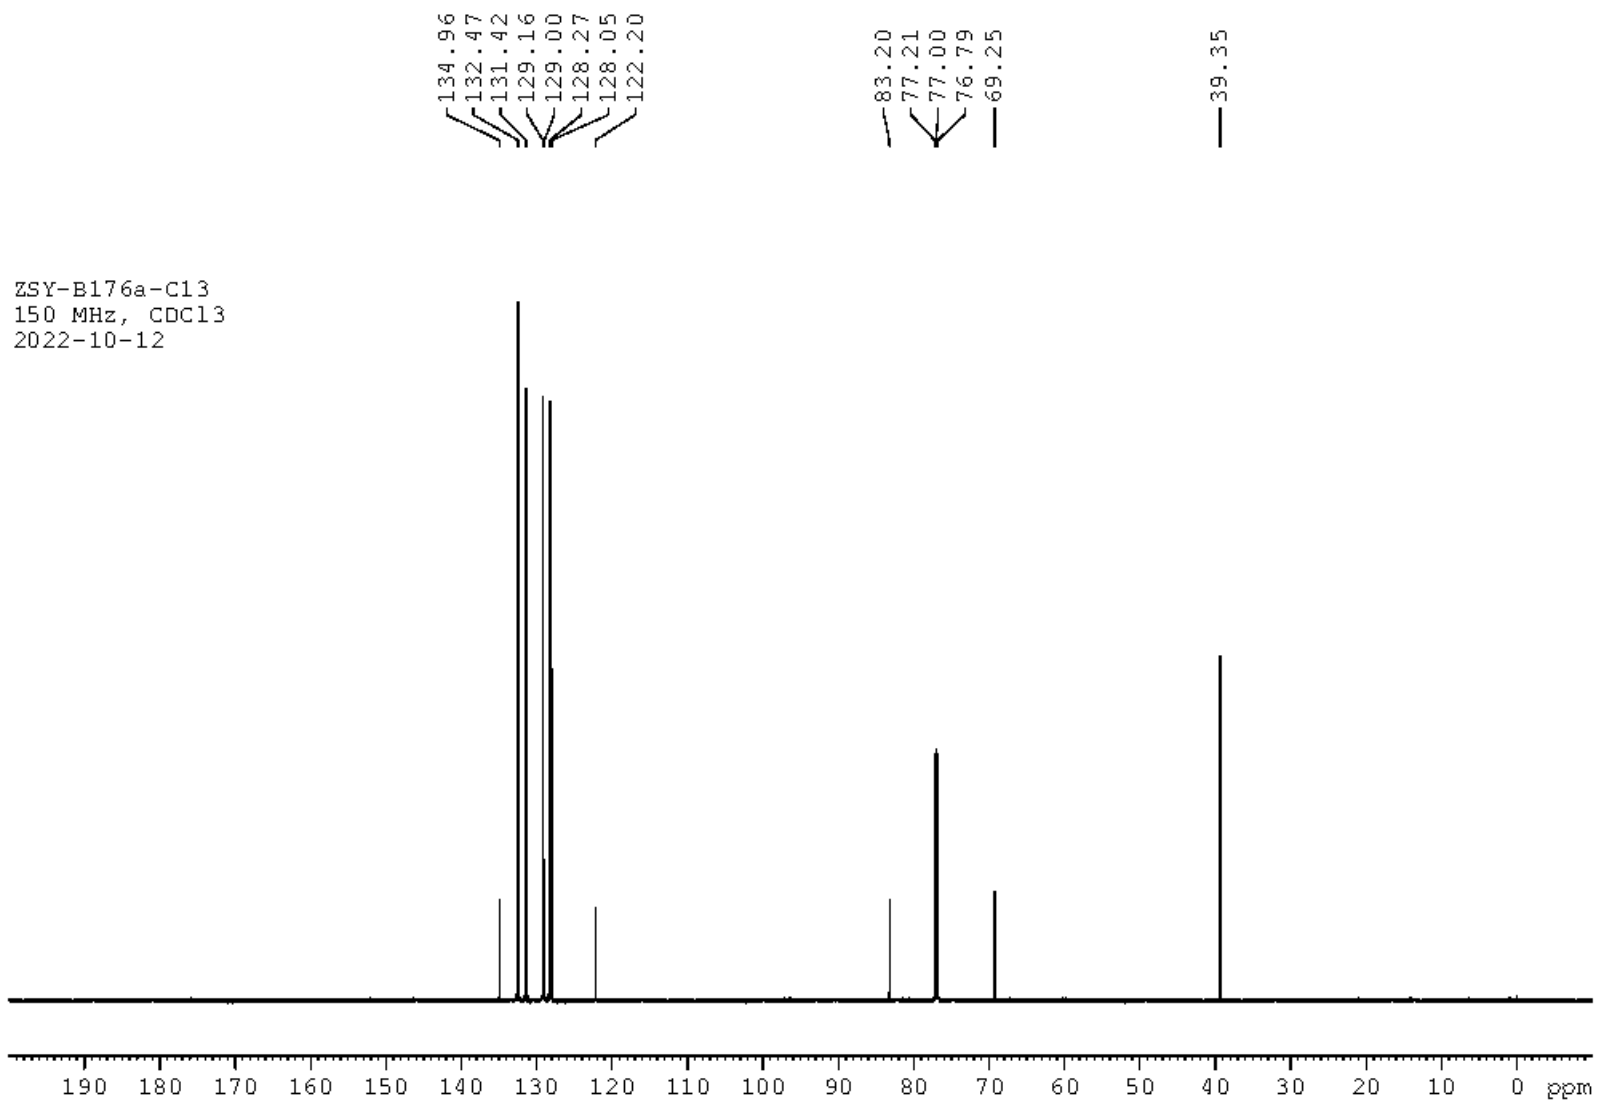

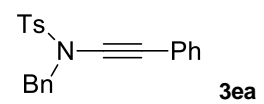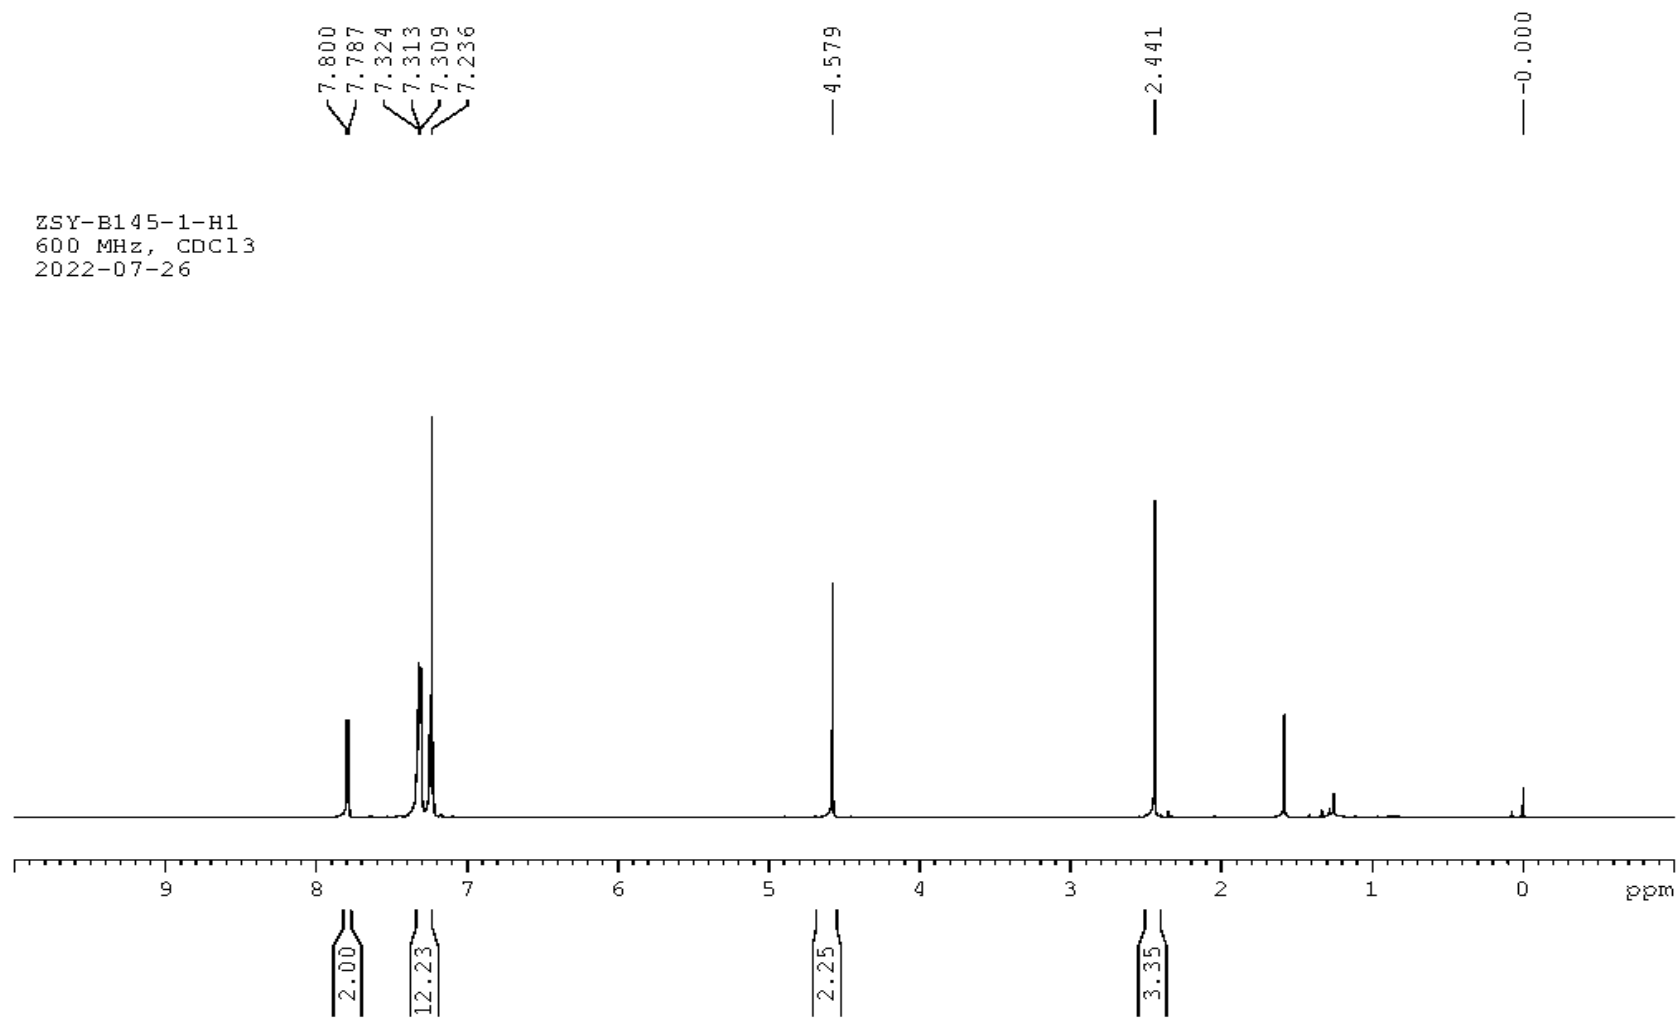

ZSY-B145-1-C13  
150 MHz, CDCl<sub>3</sub>  
2022-07-25

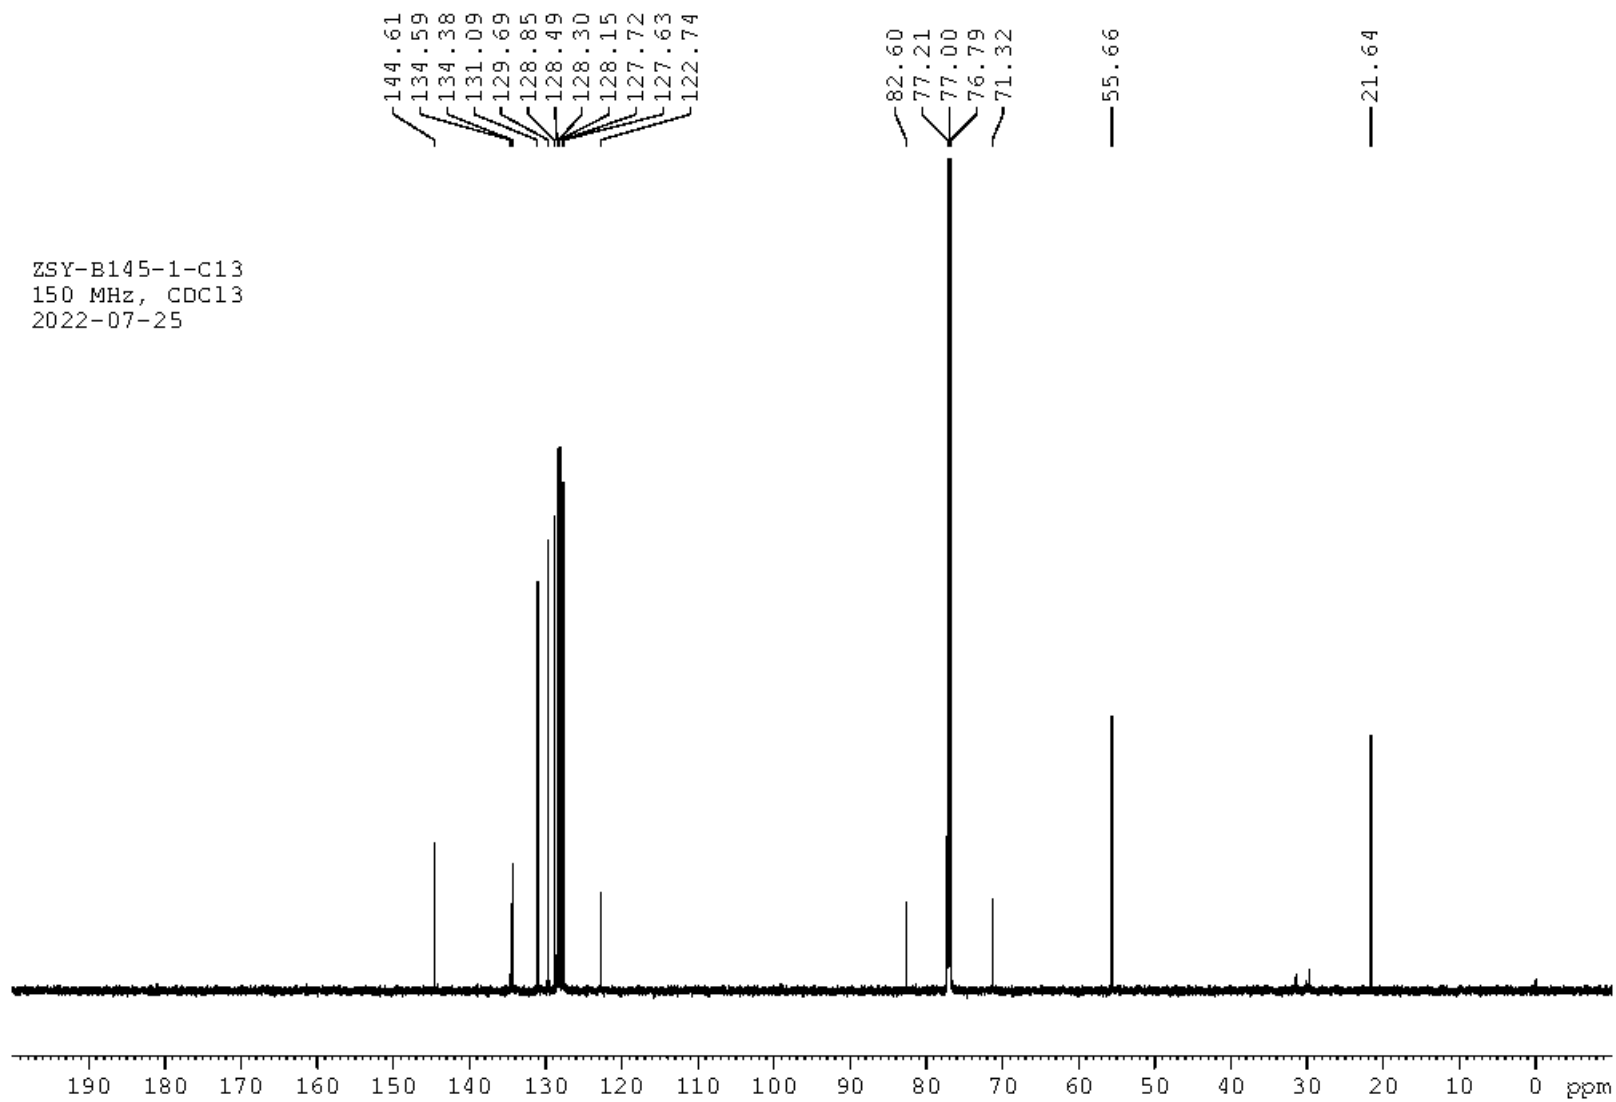

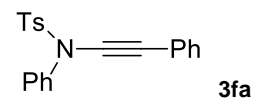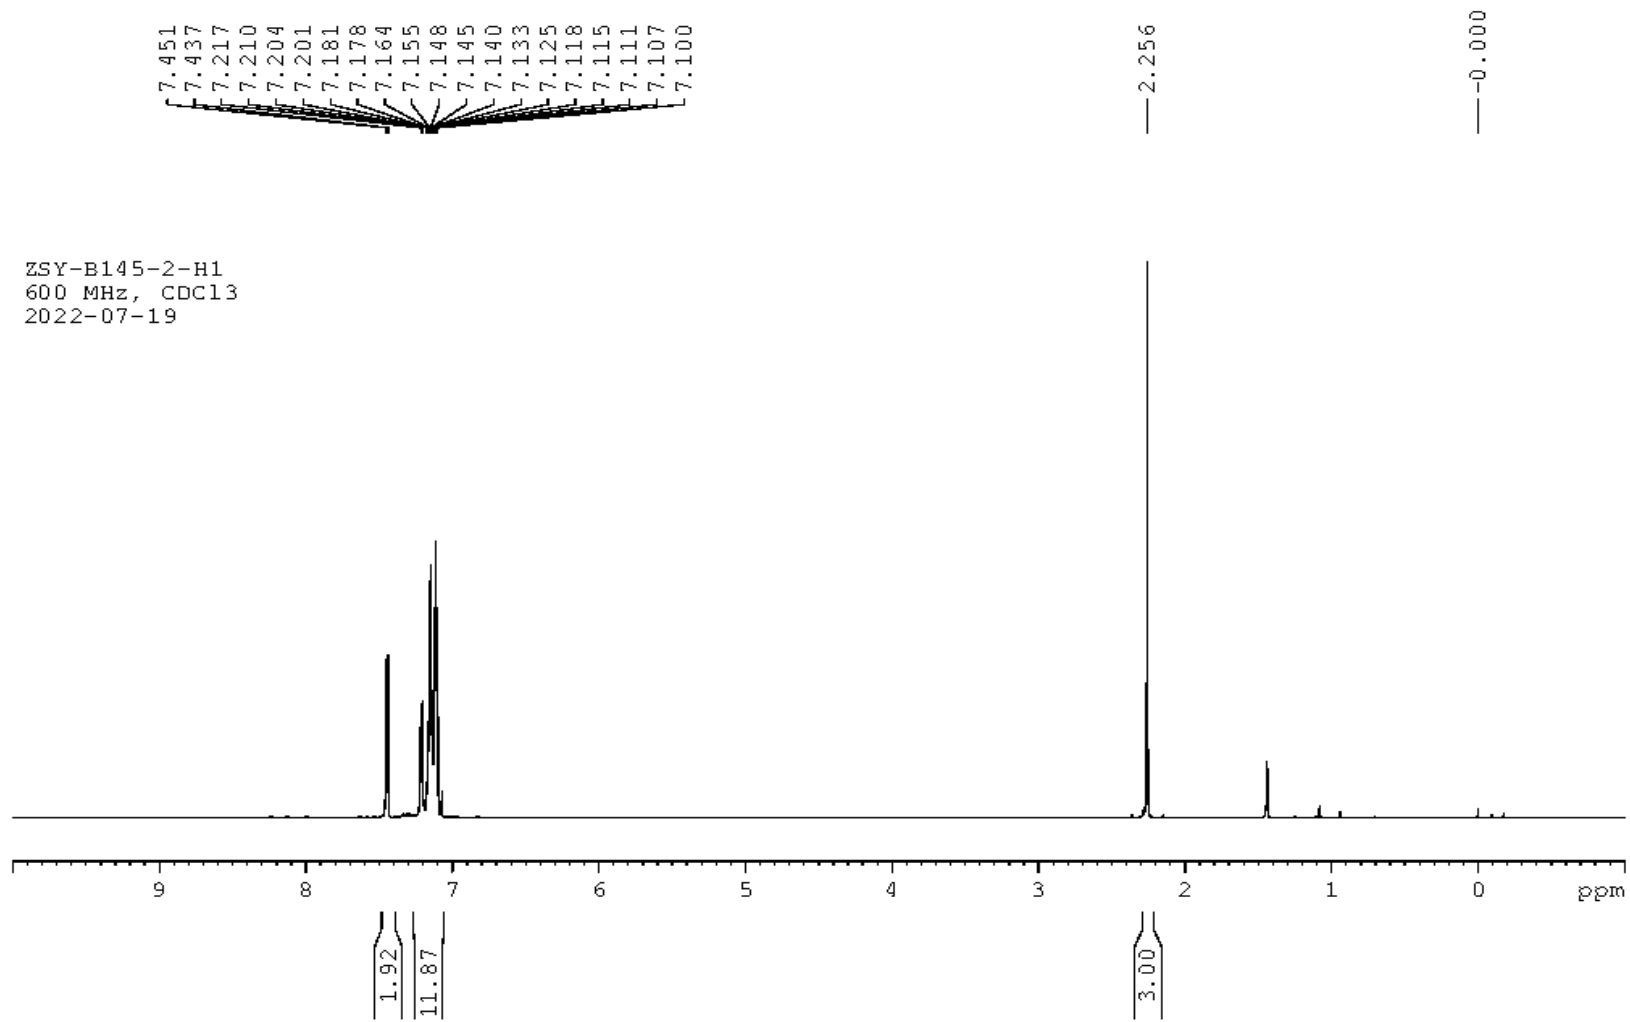



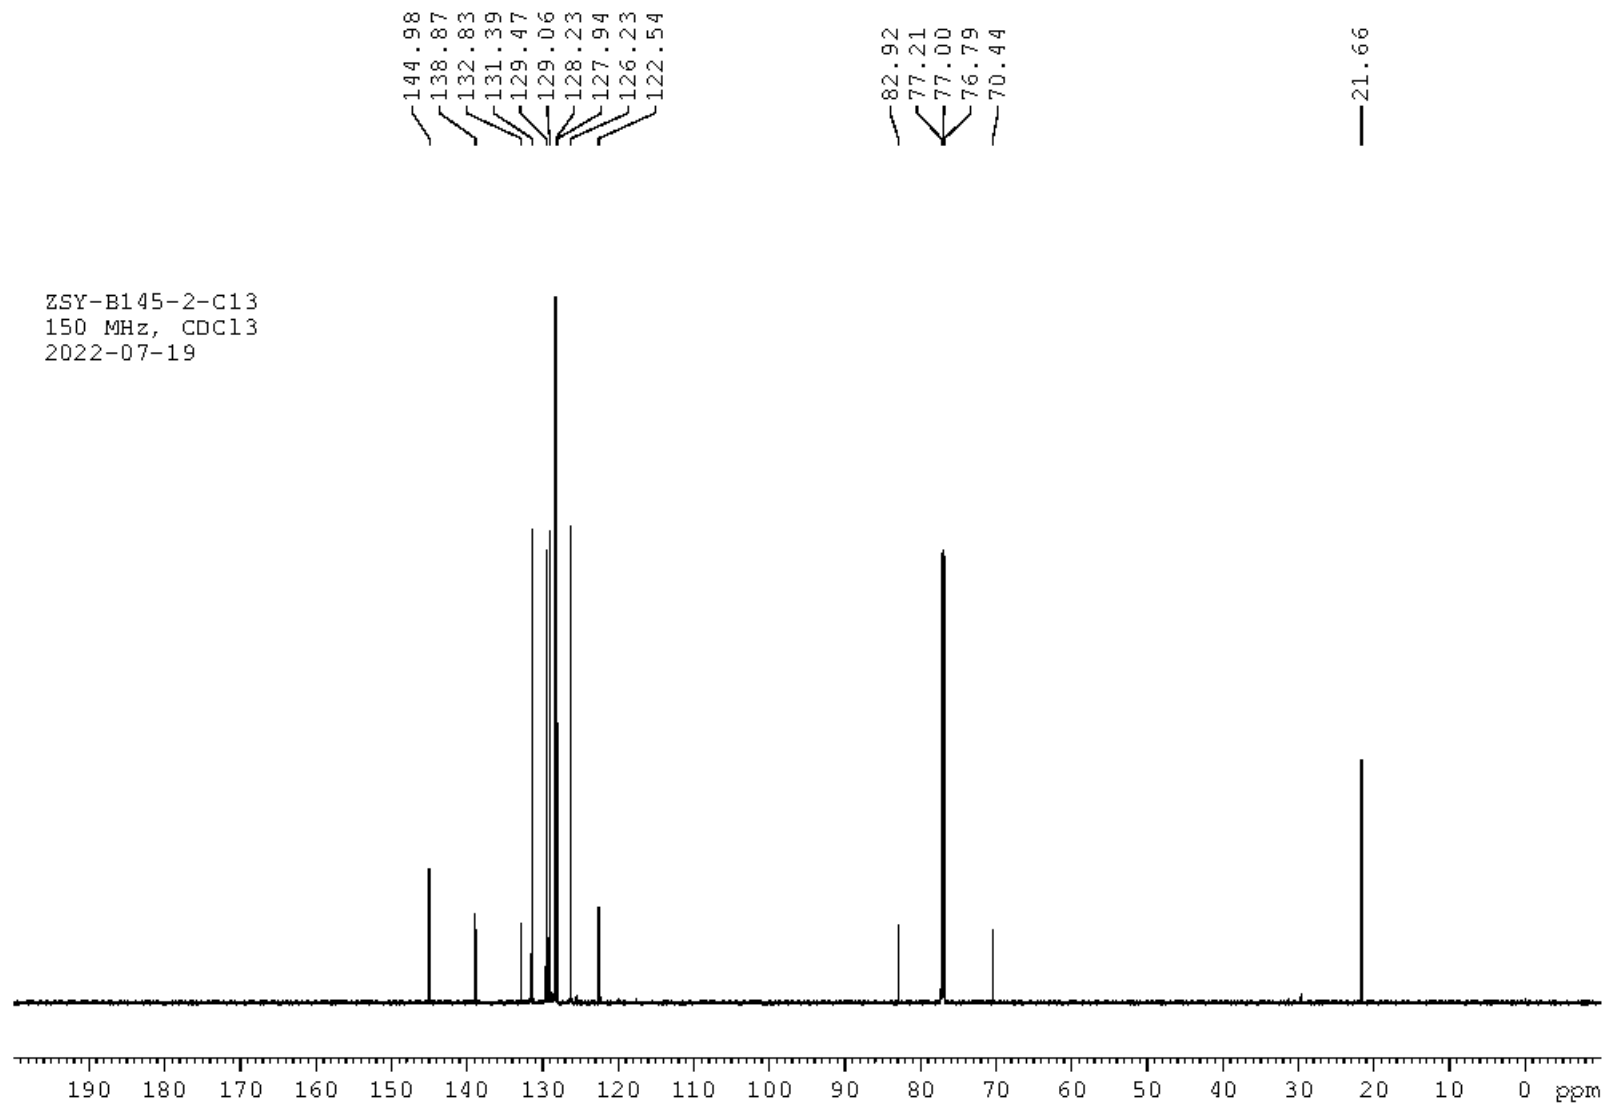

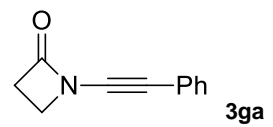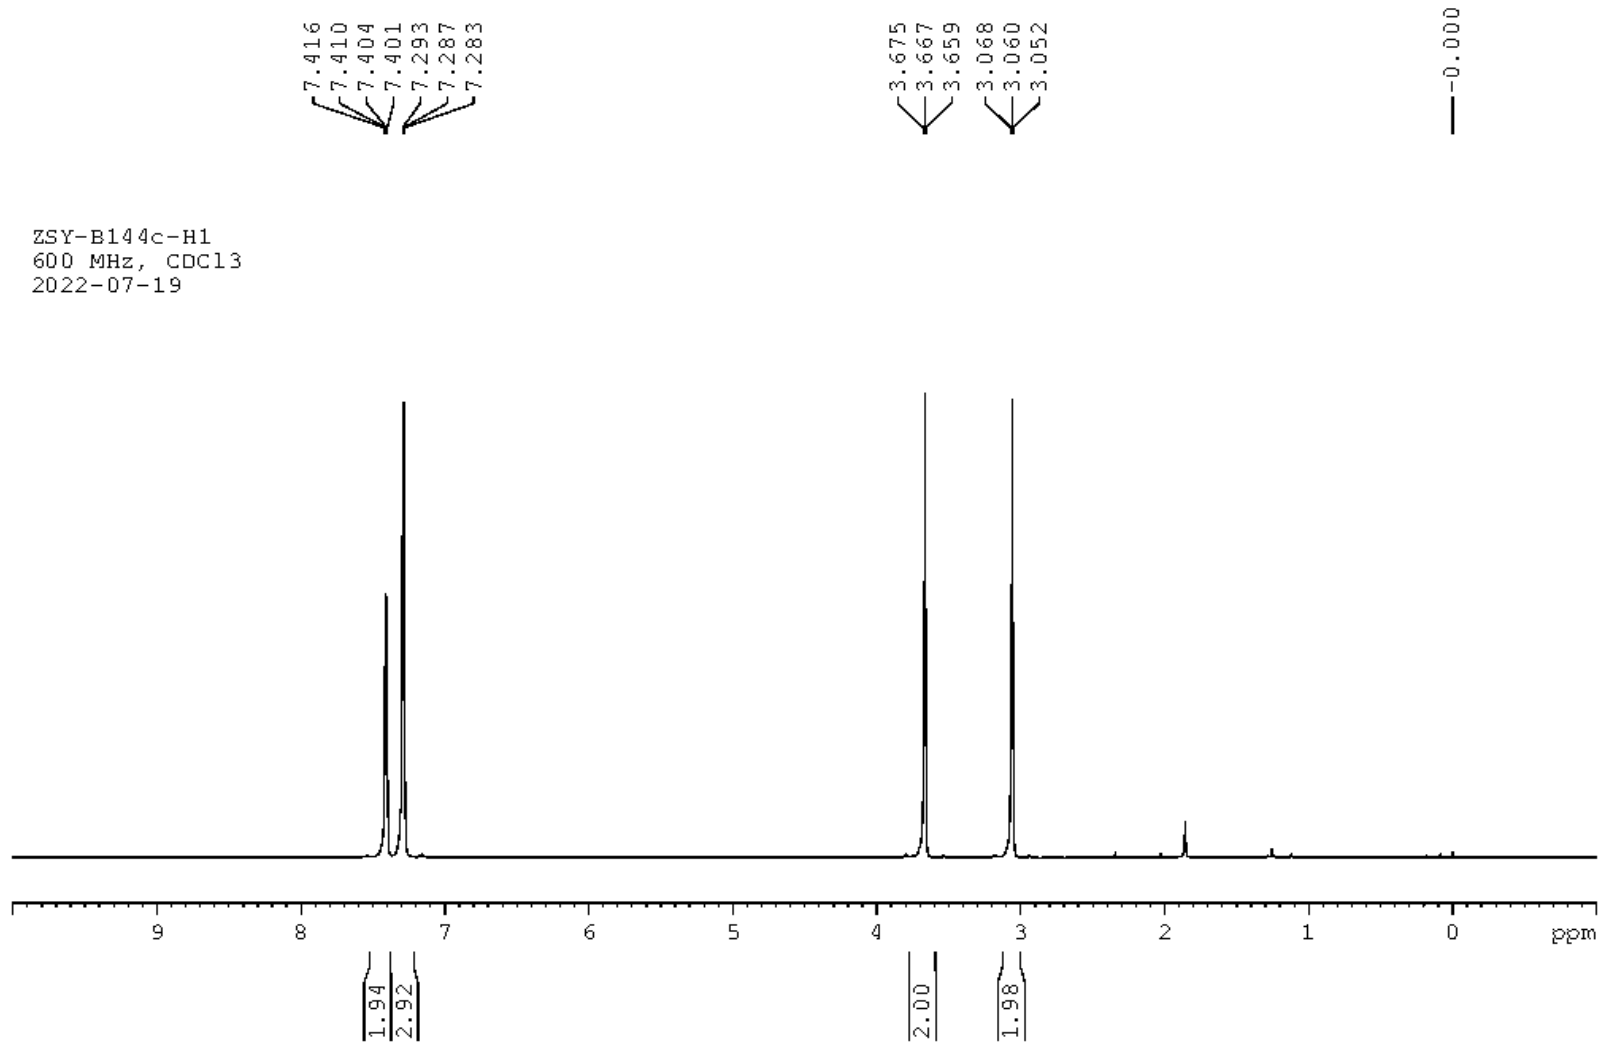

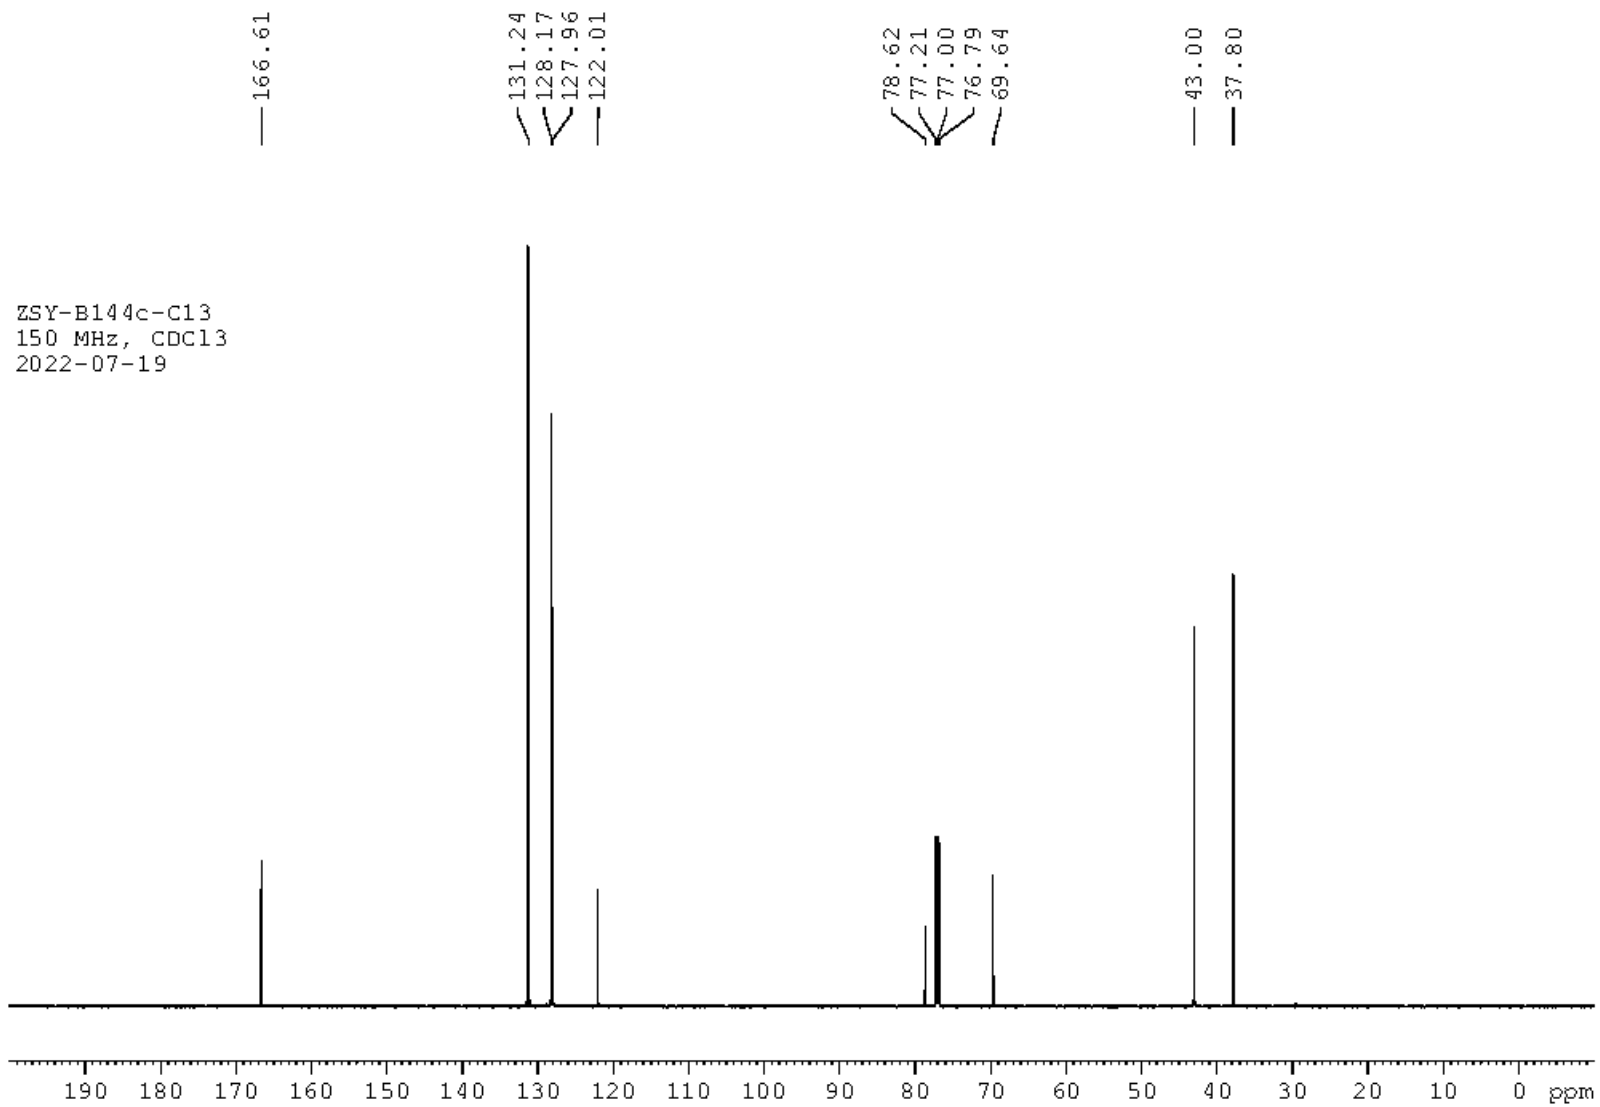

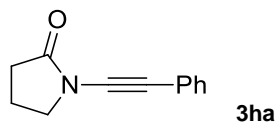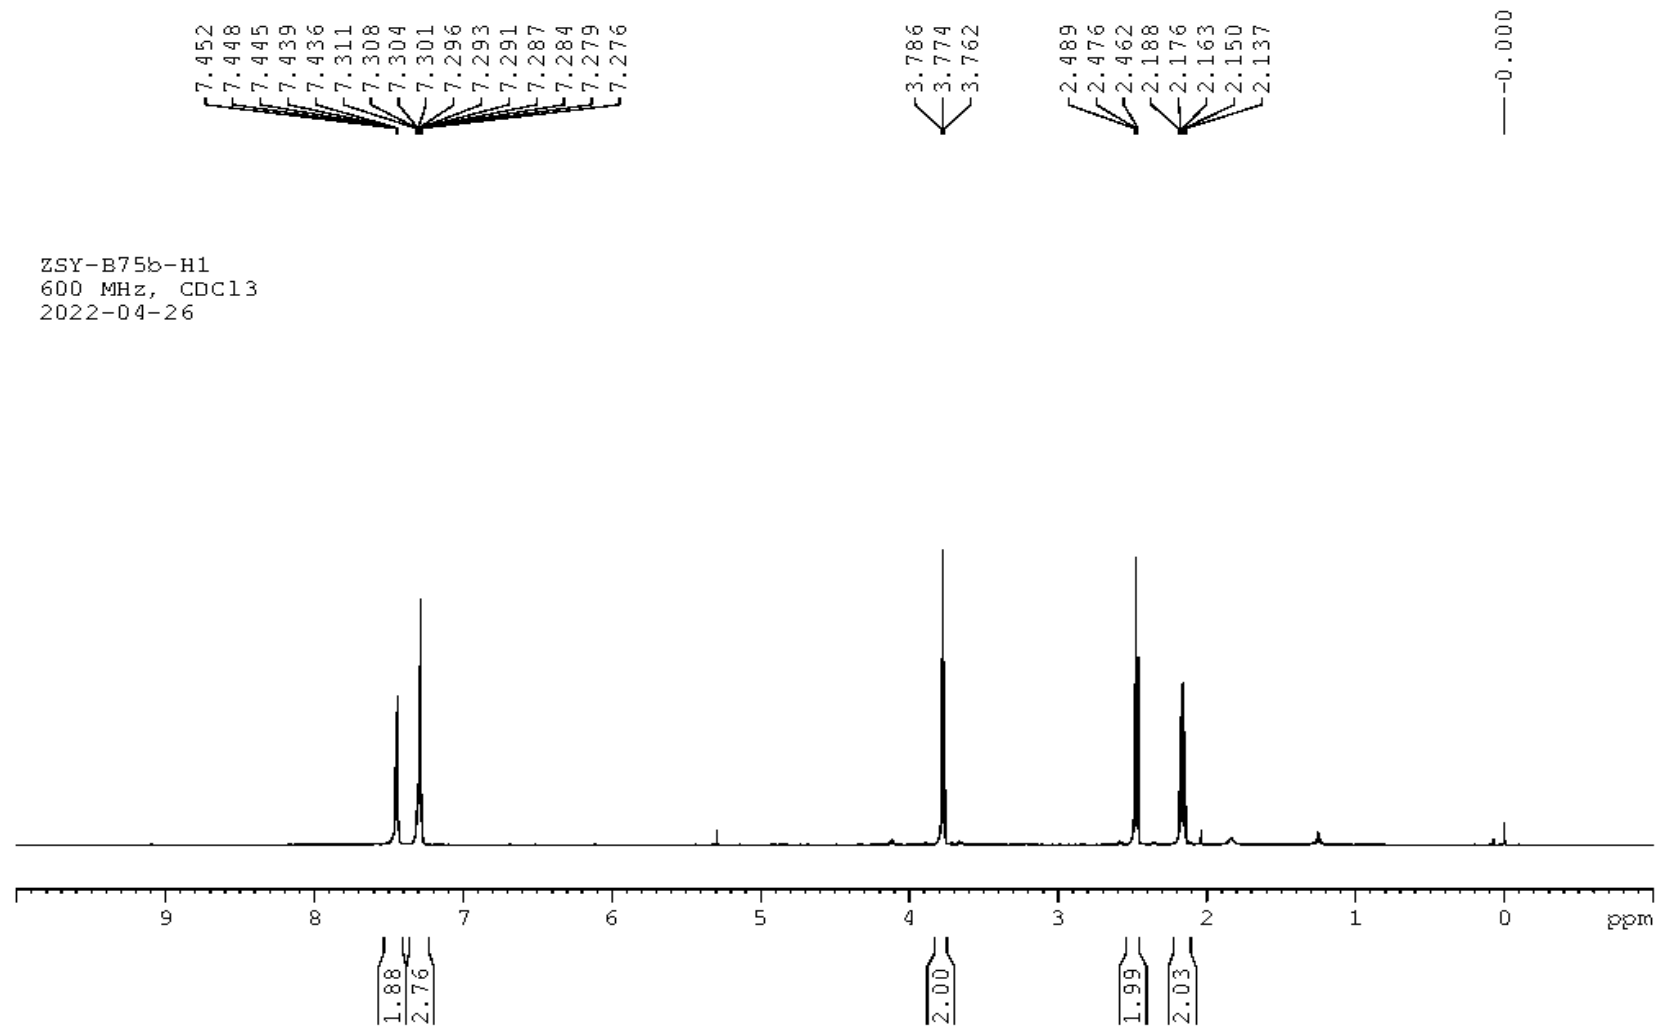

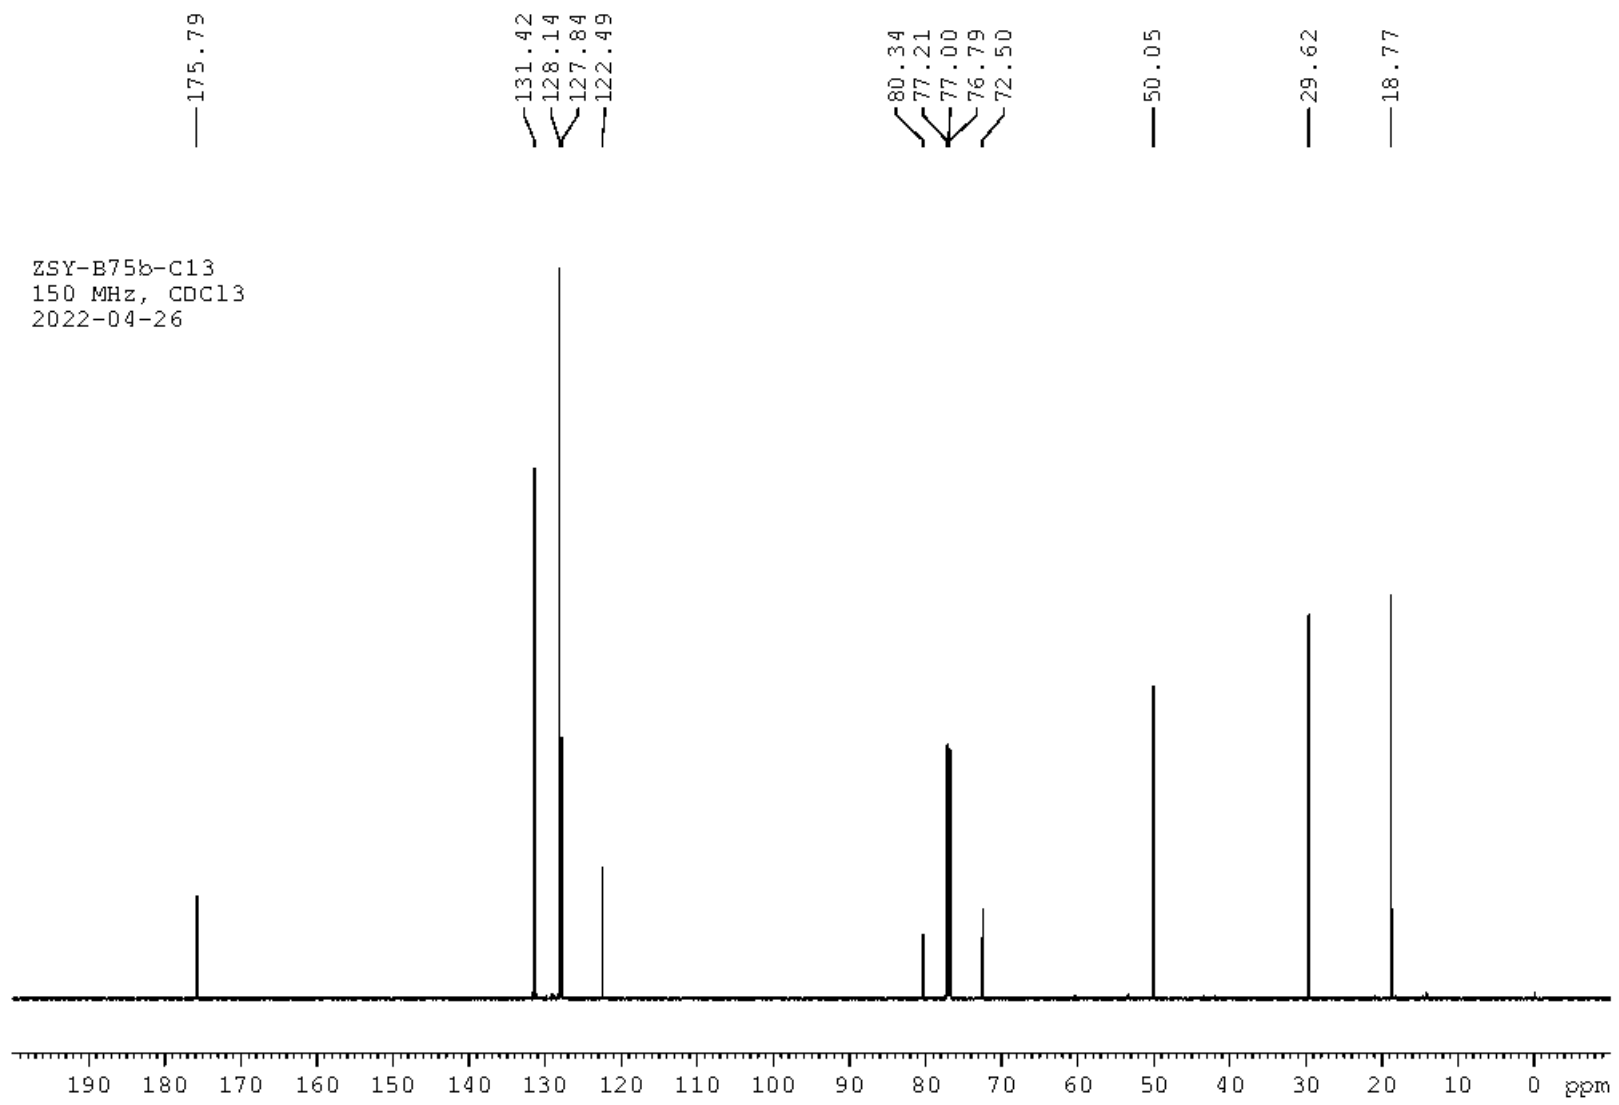

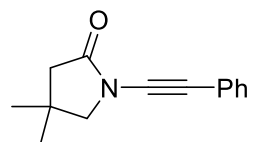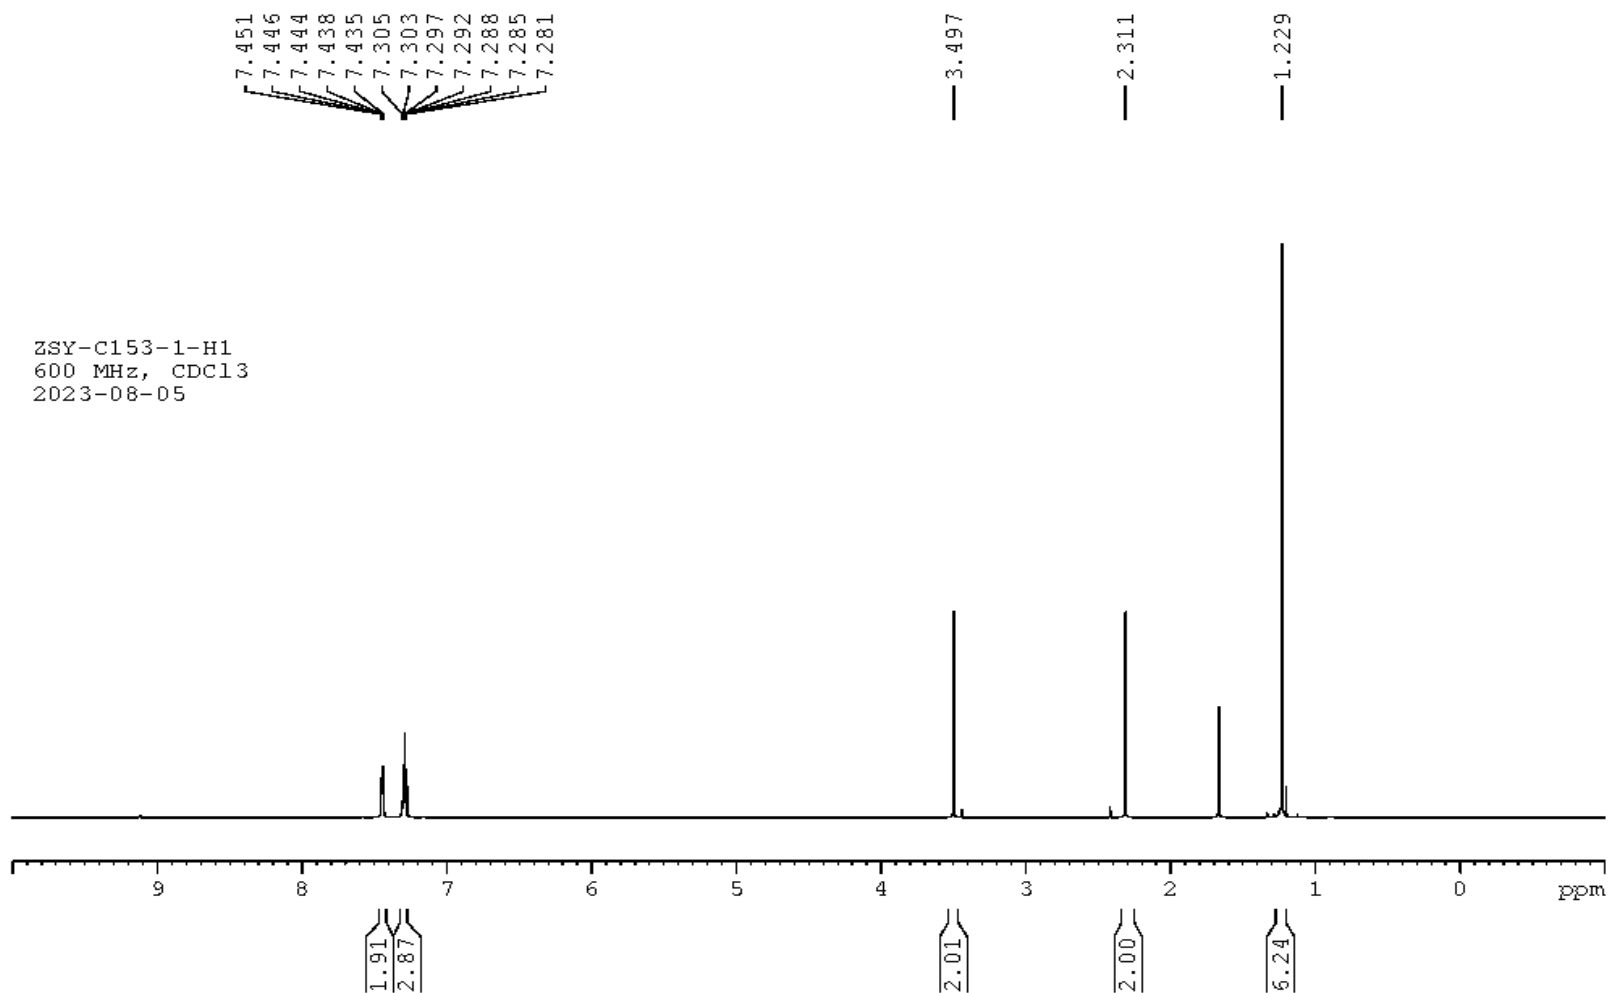

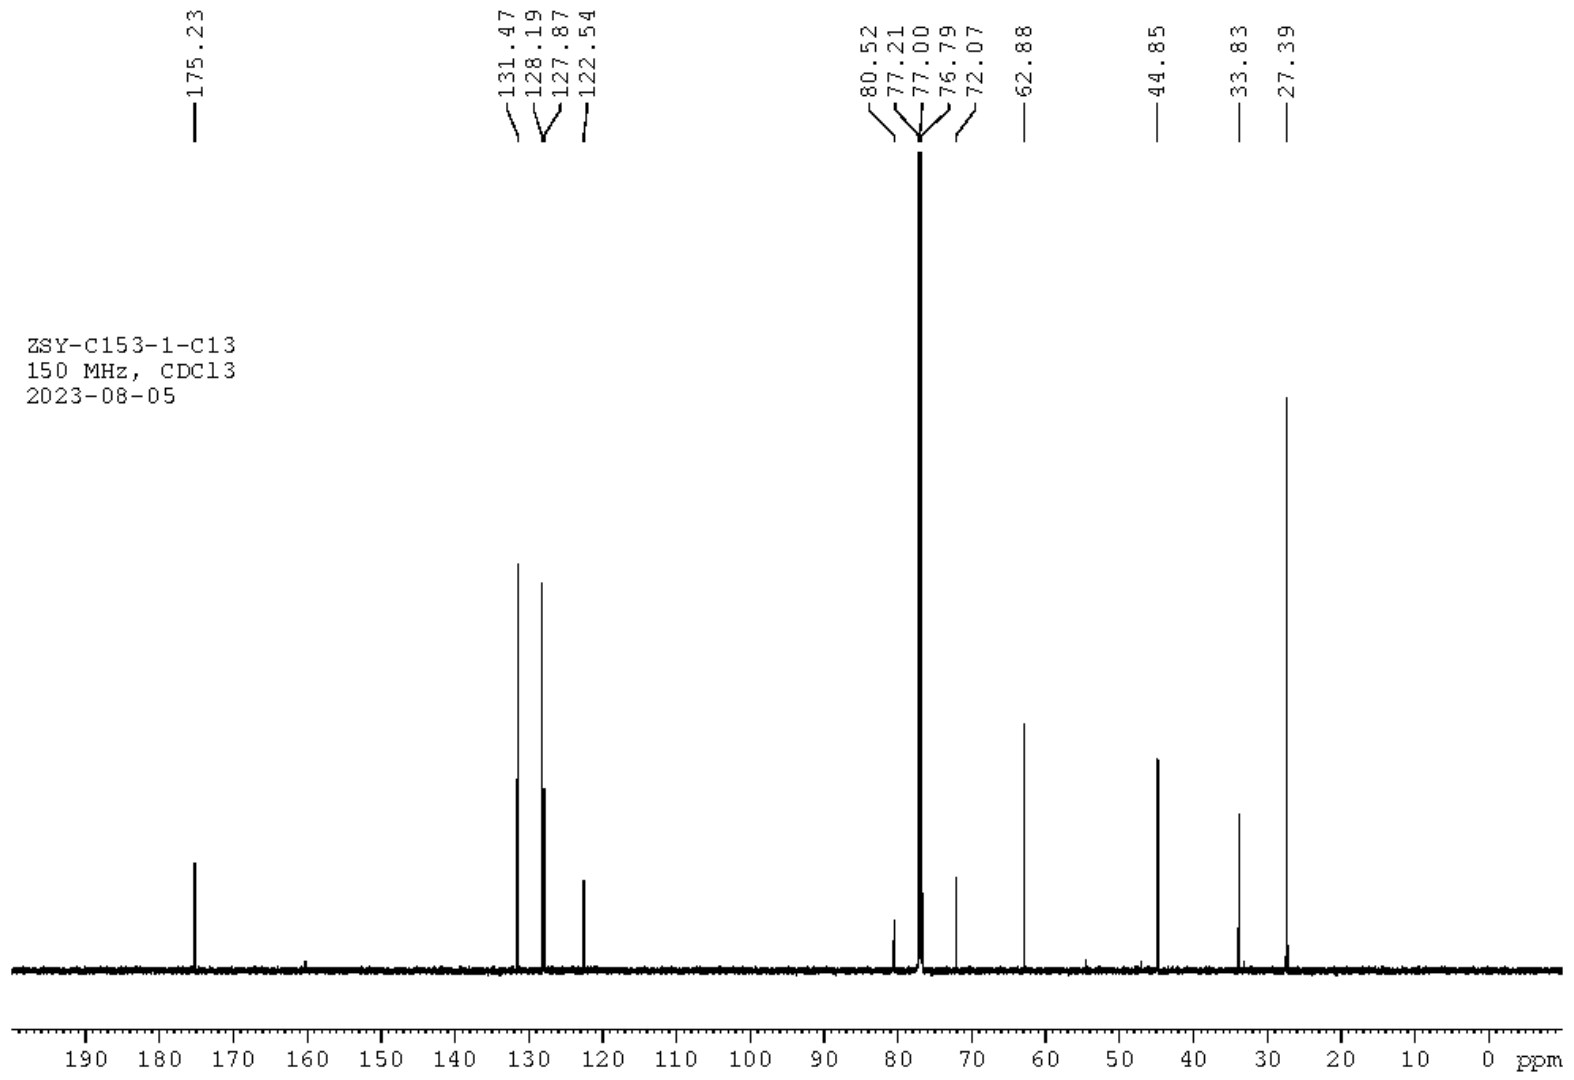

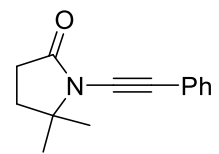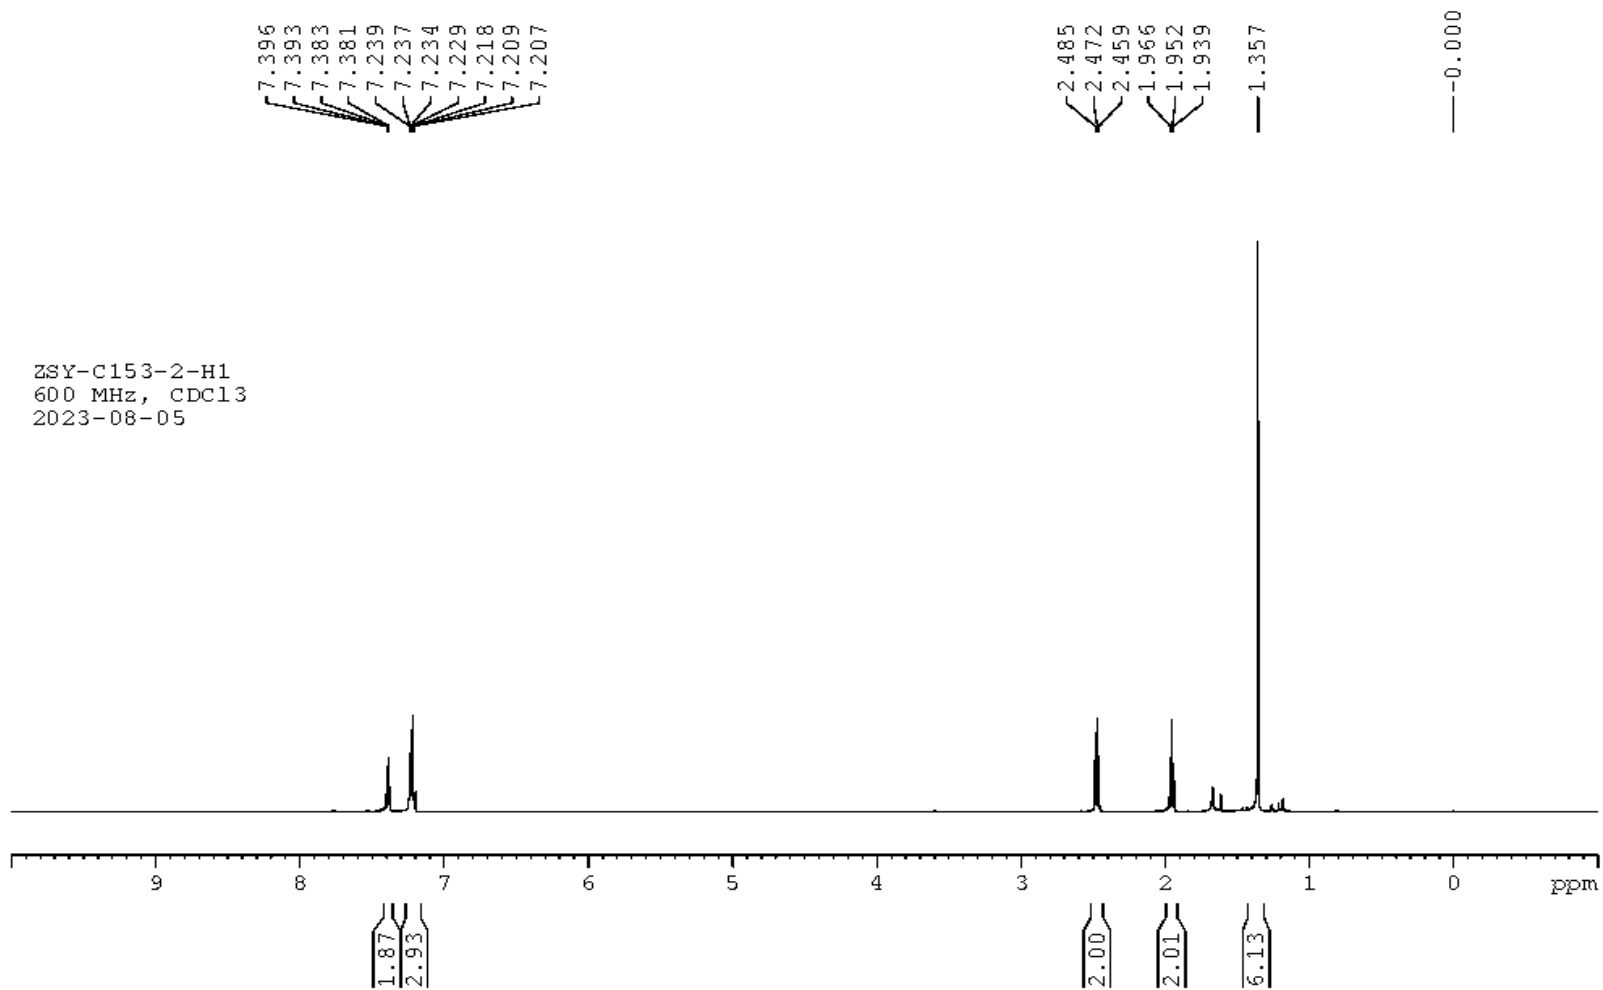



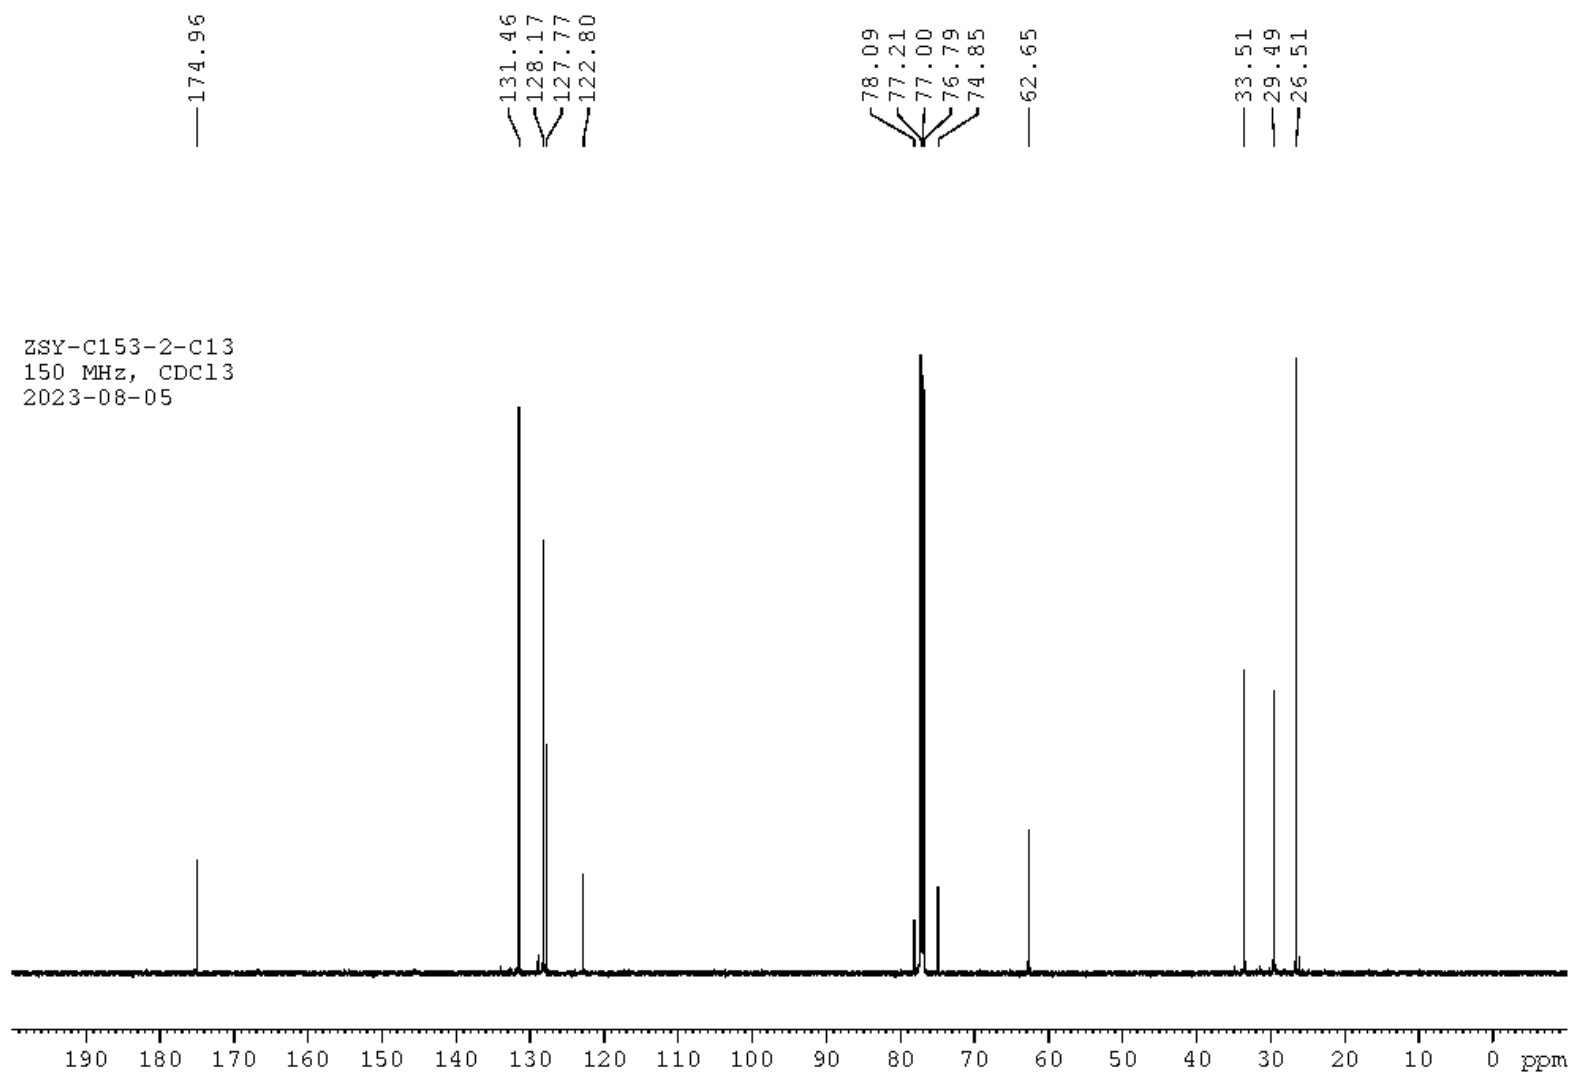

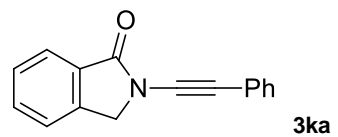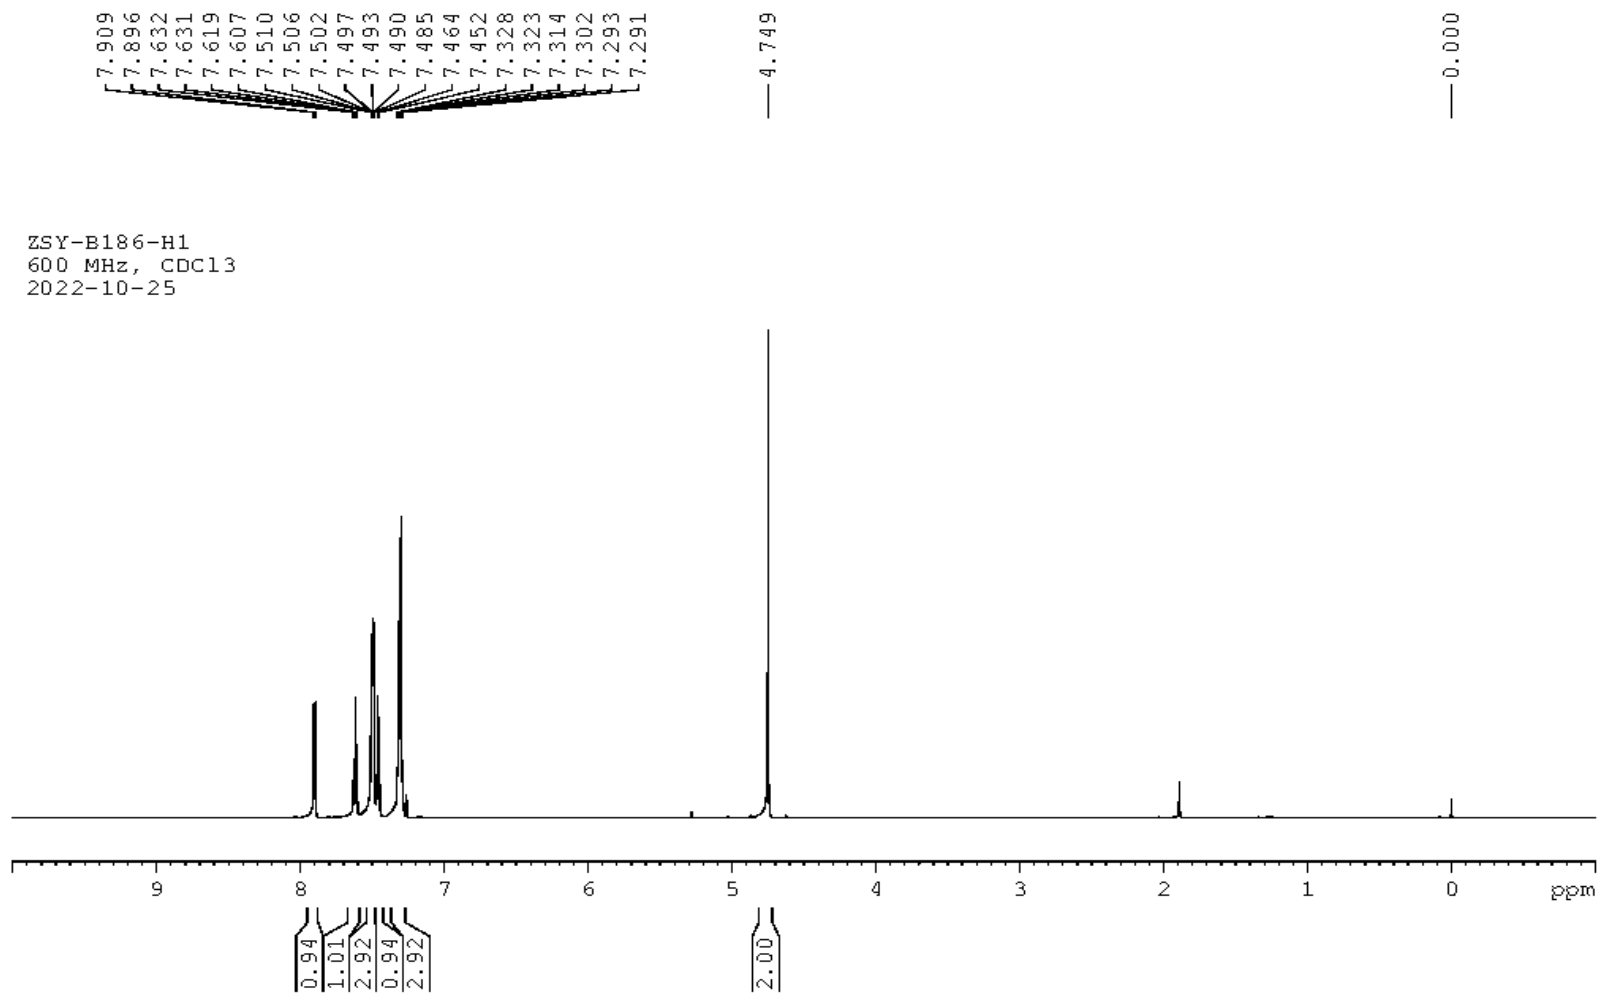

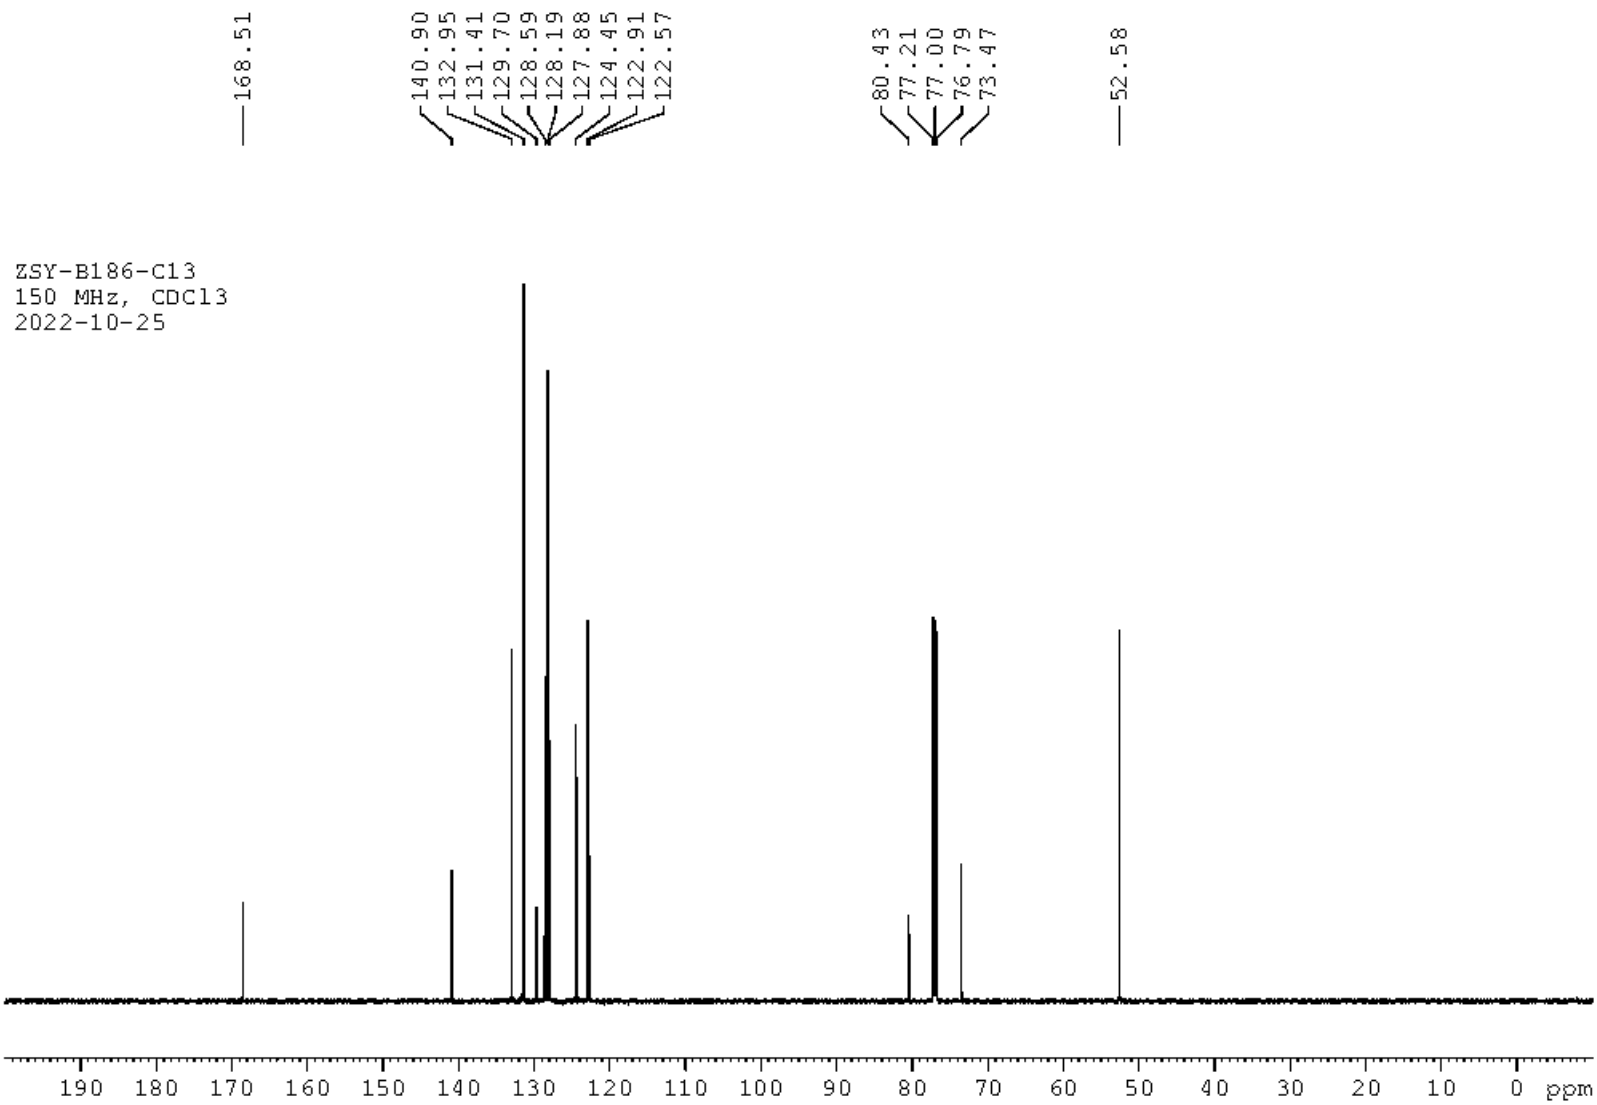

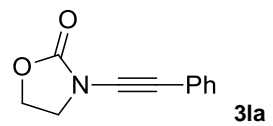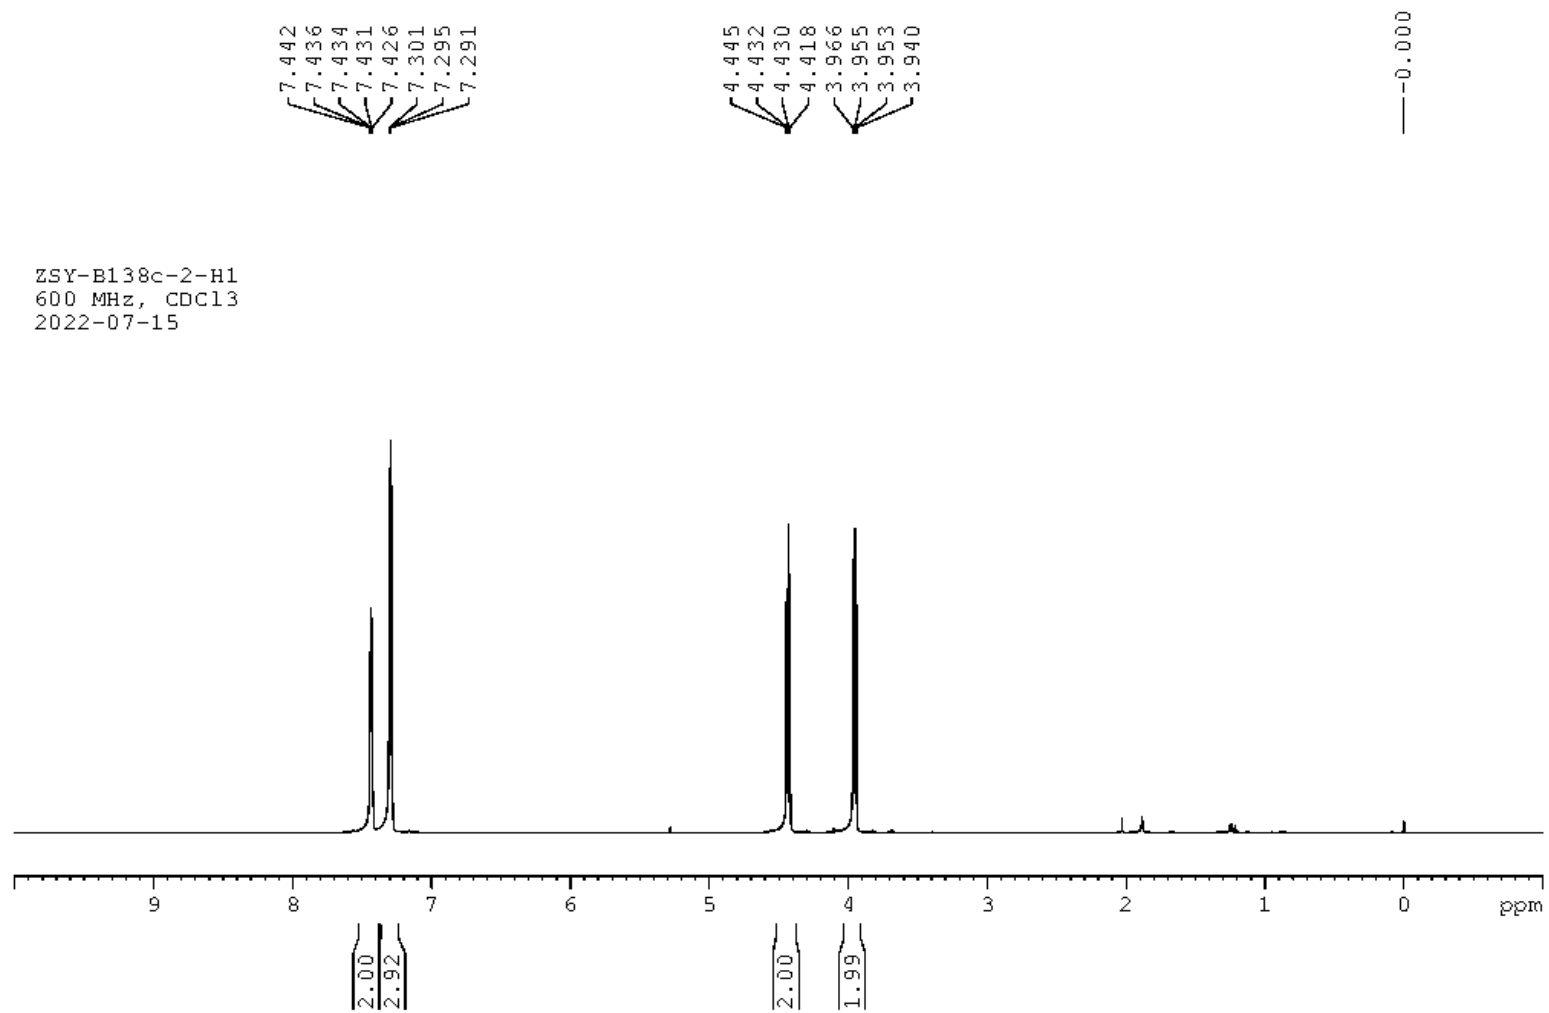

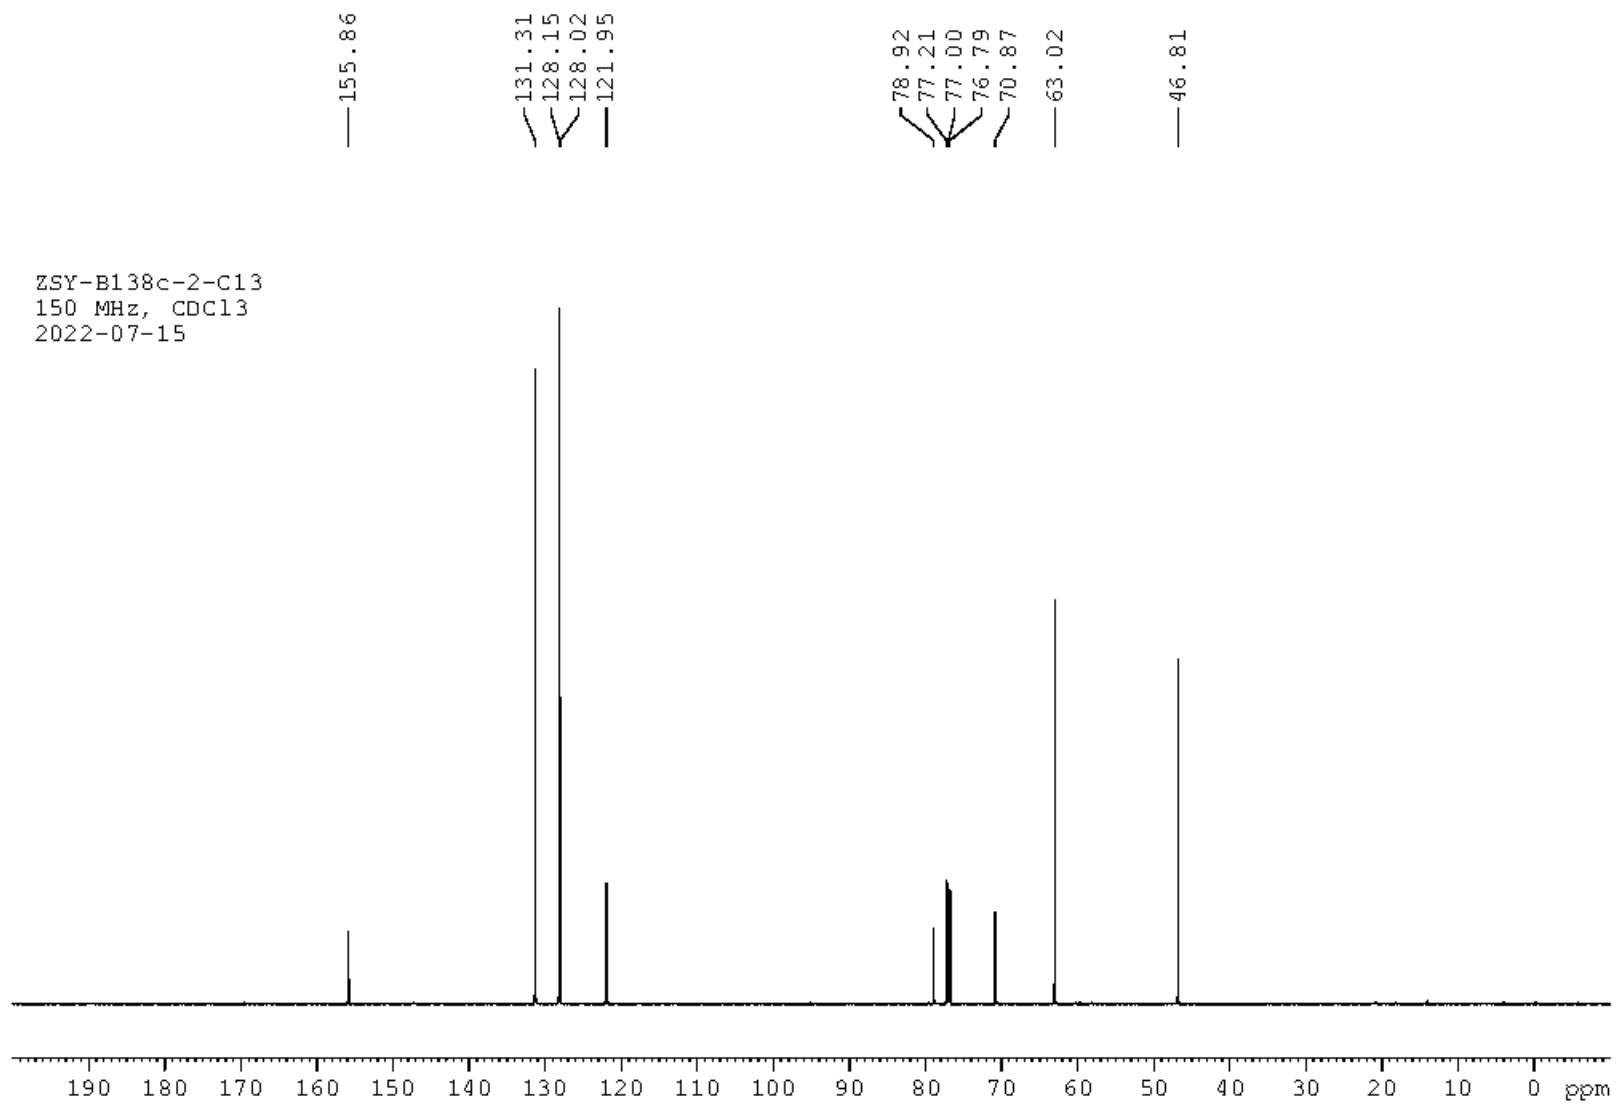

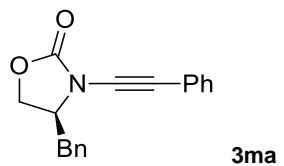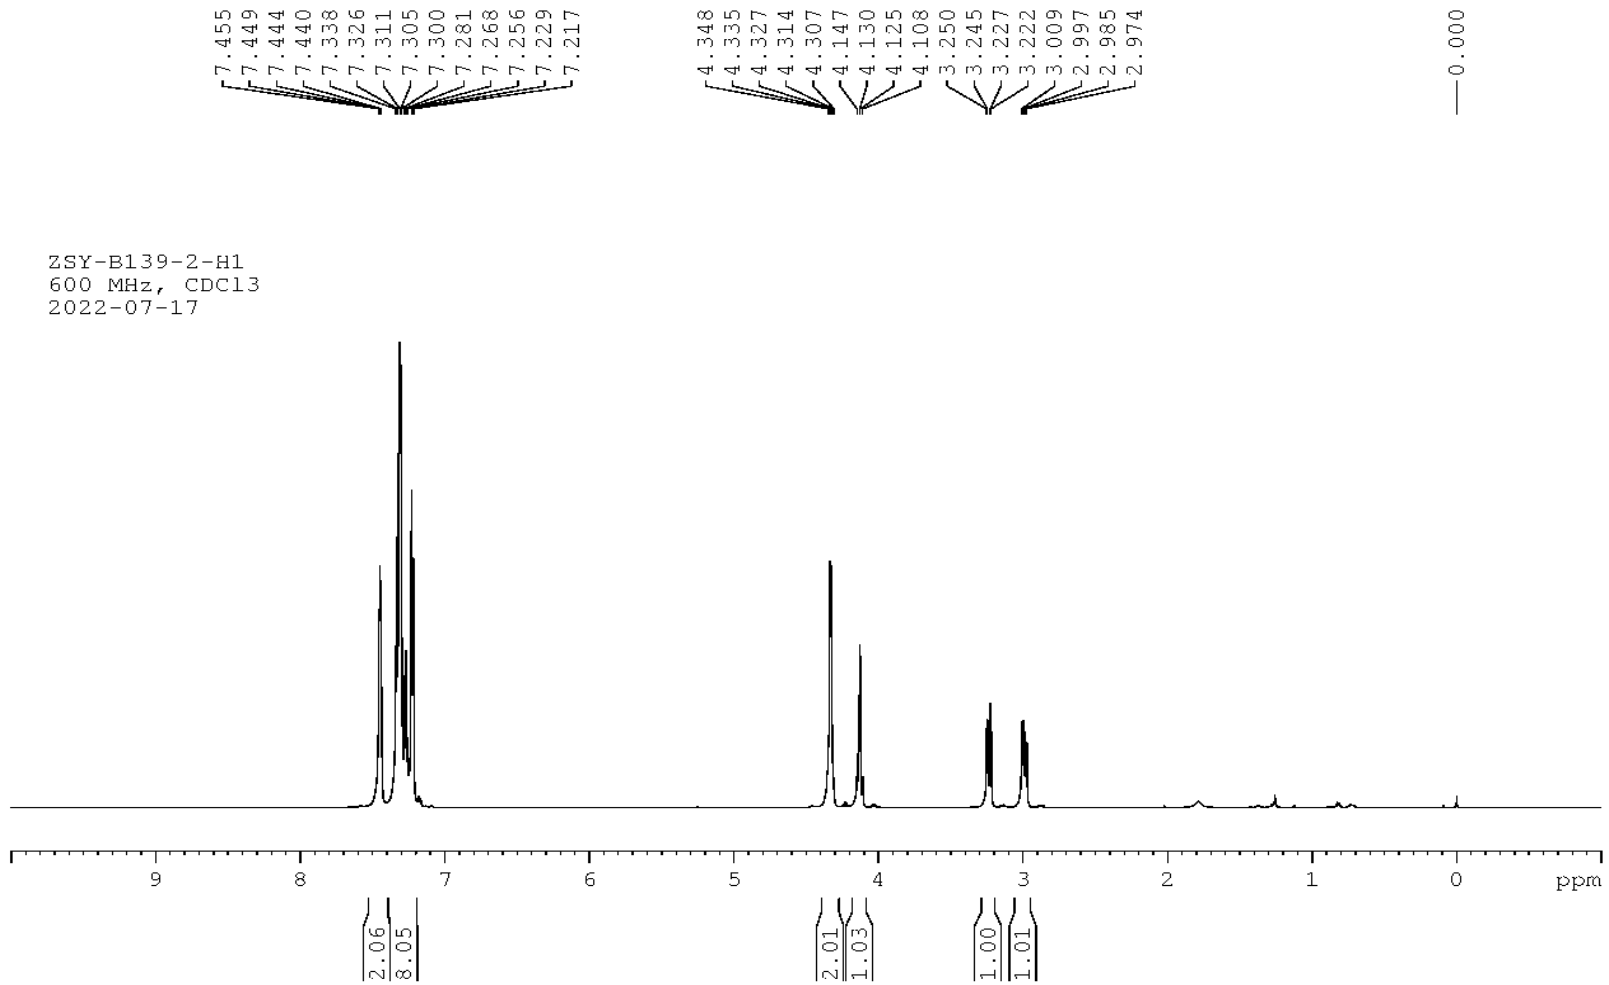

ZSY-B139-2-C13  
150 MHz, CDCl<sub>3</sub>  
2022-07-17

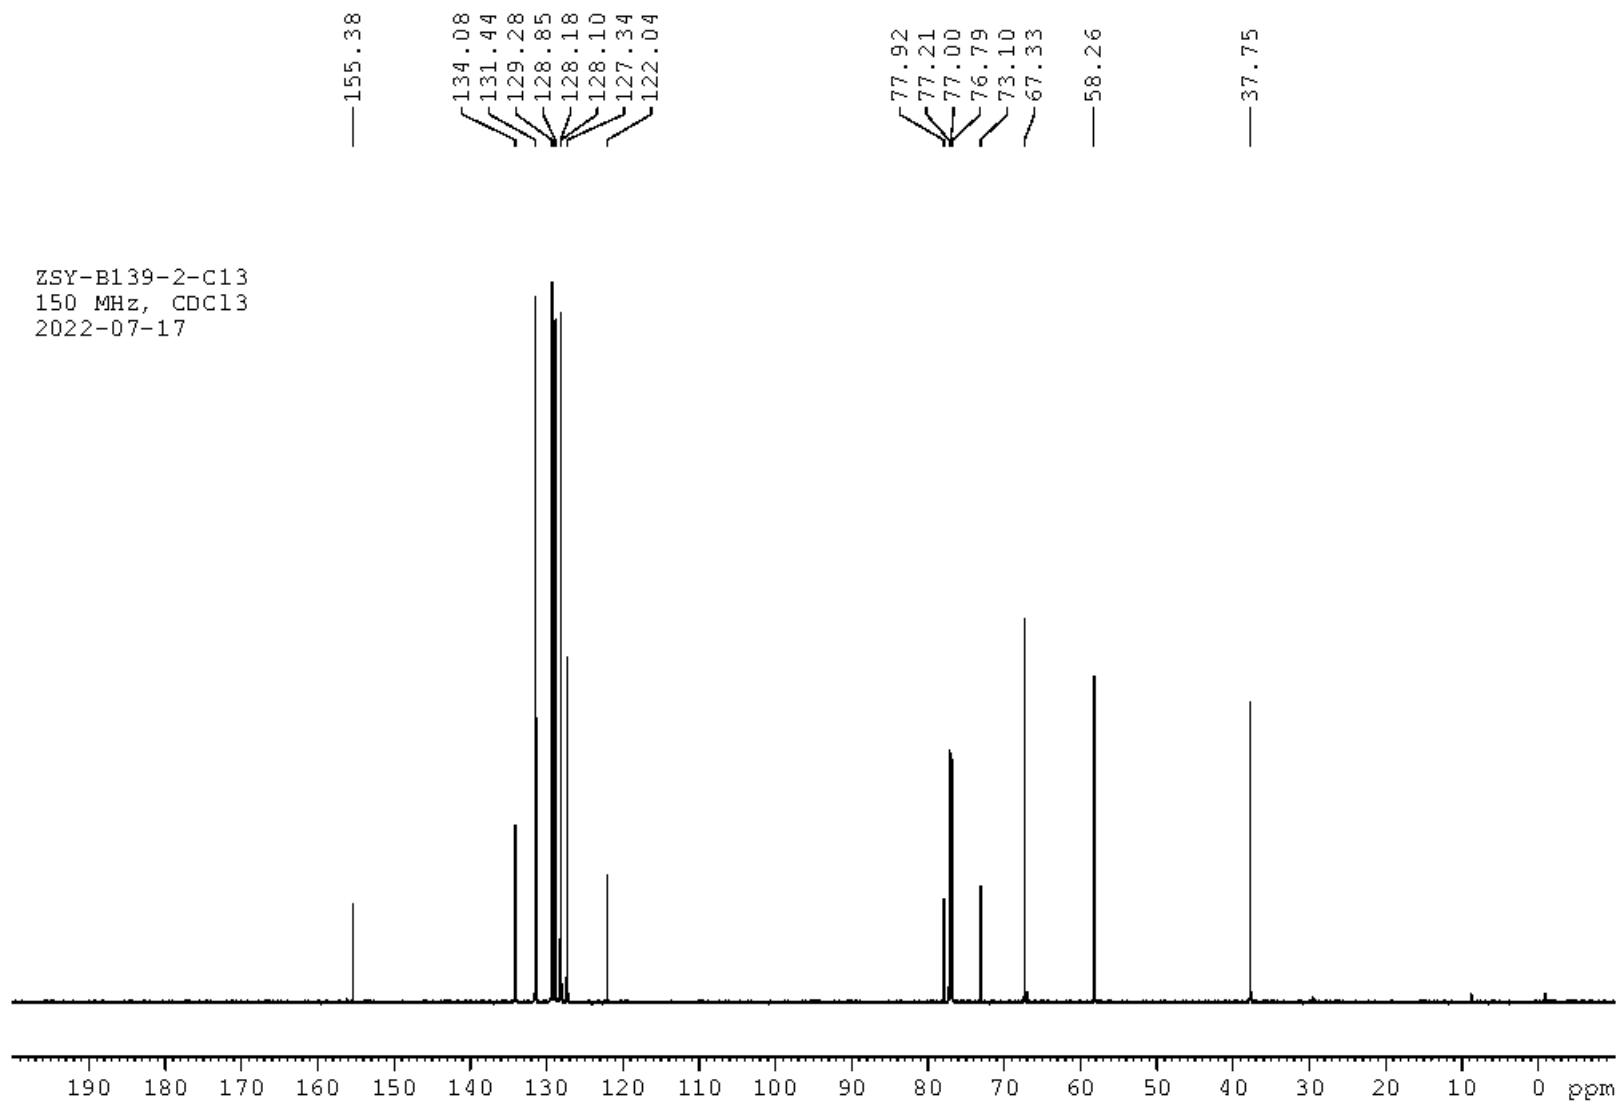

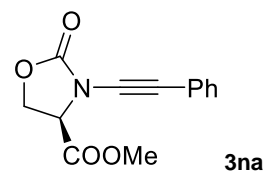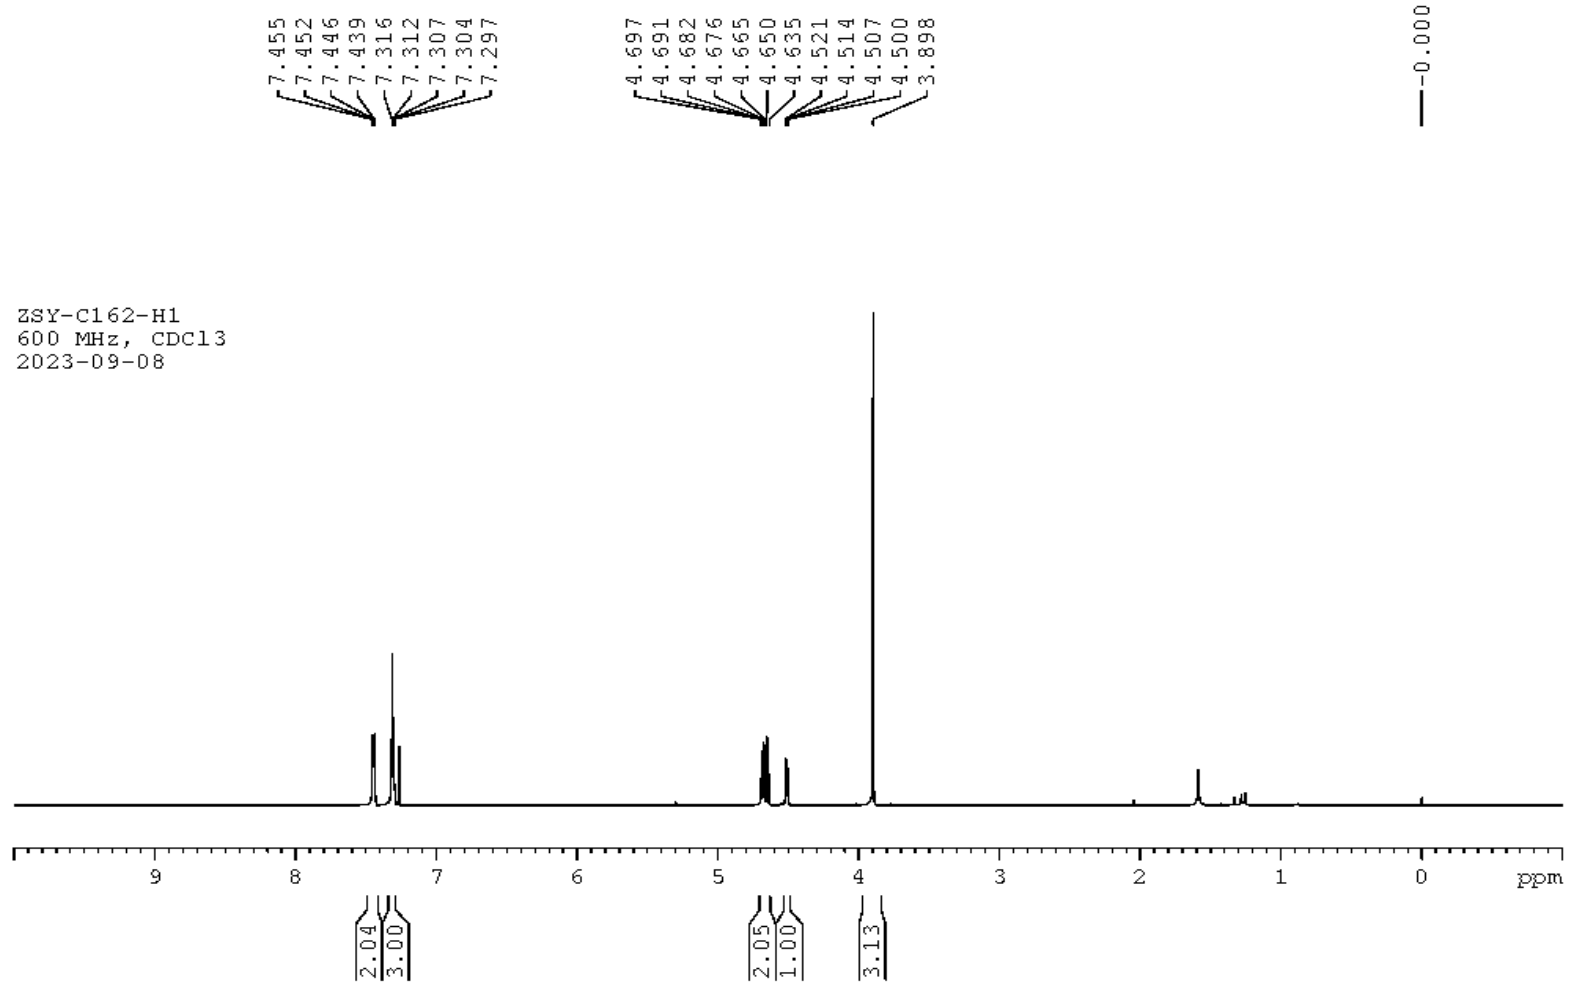



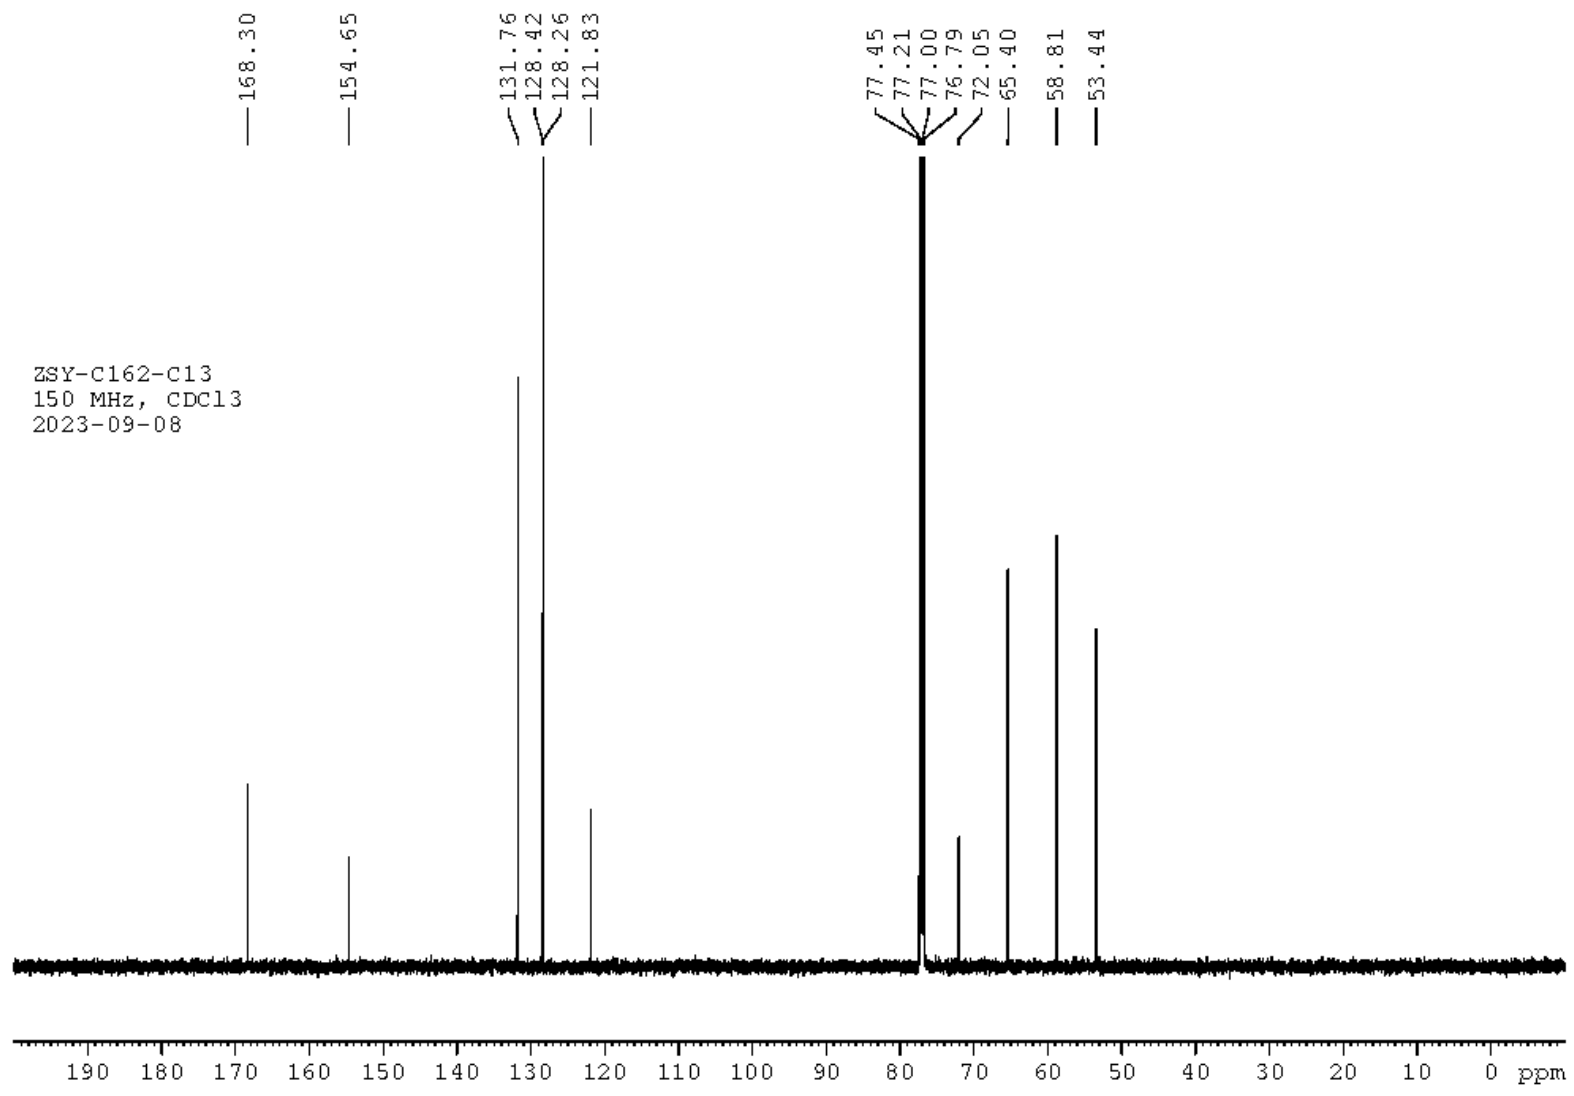

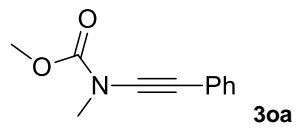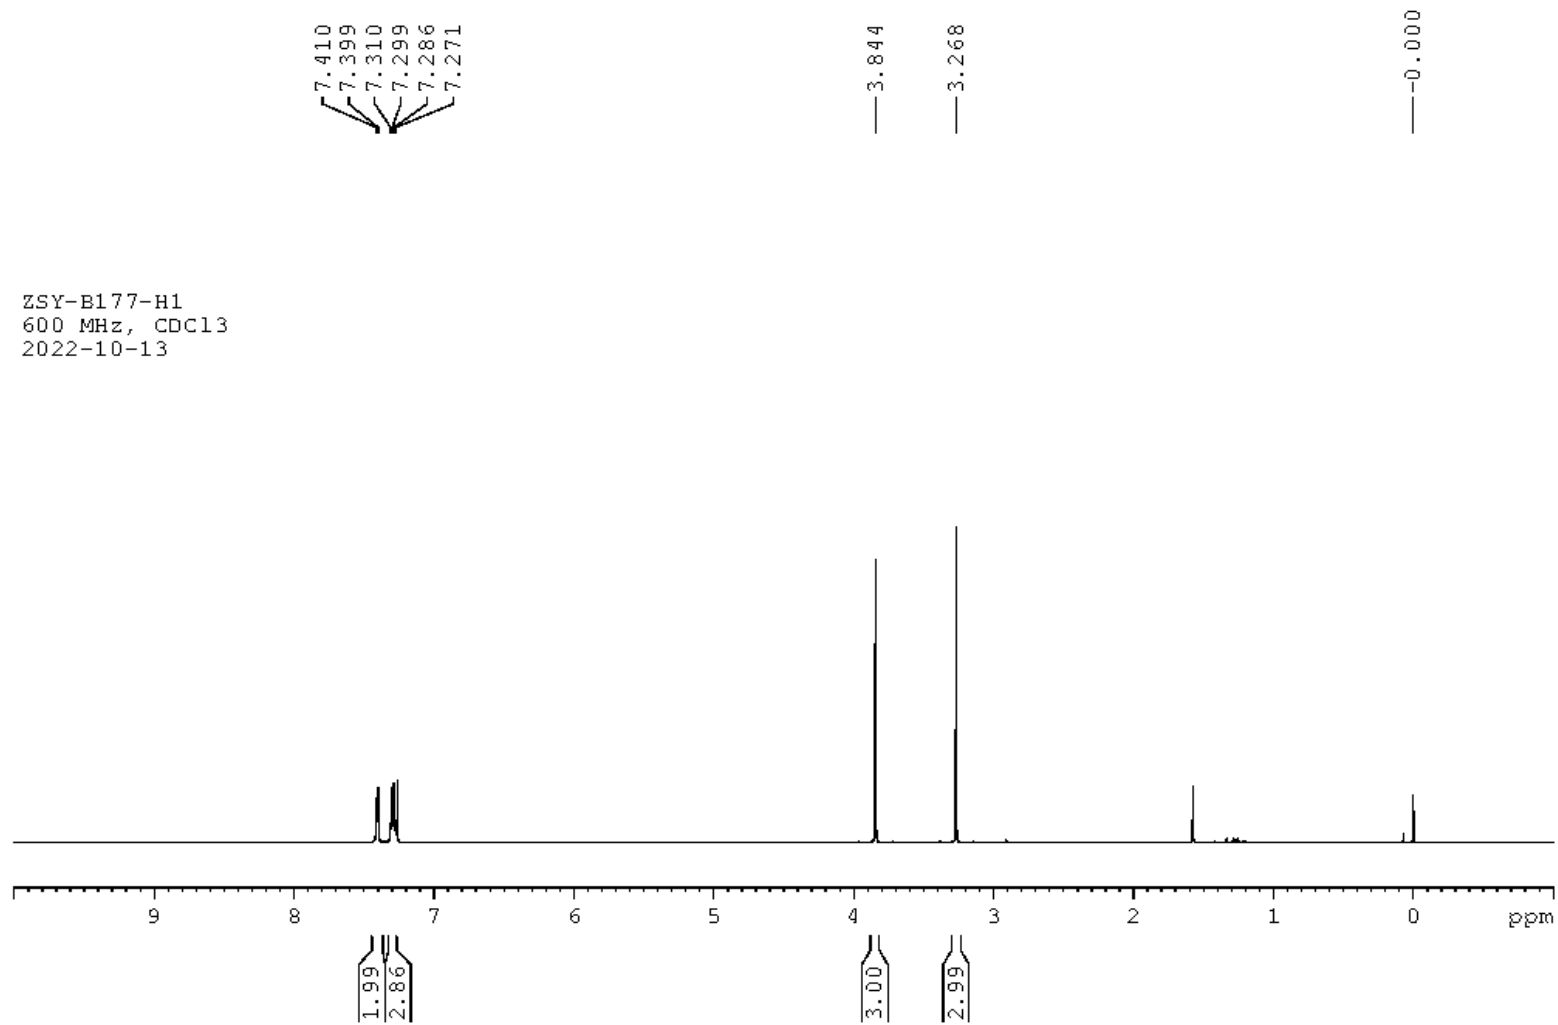

ZSY-B177-C13  
150 MHz, CDCl<sub>3</sub>  
2022-10-19

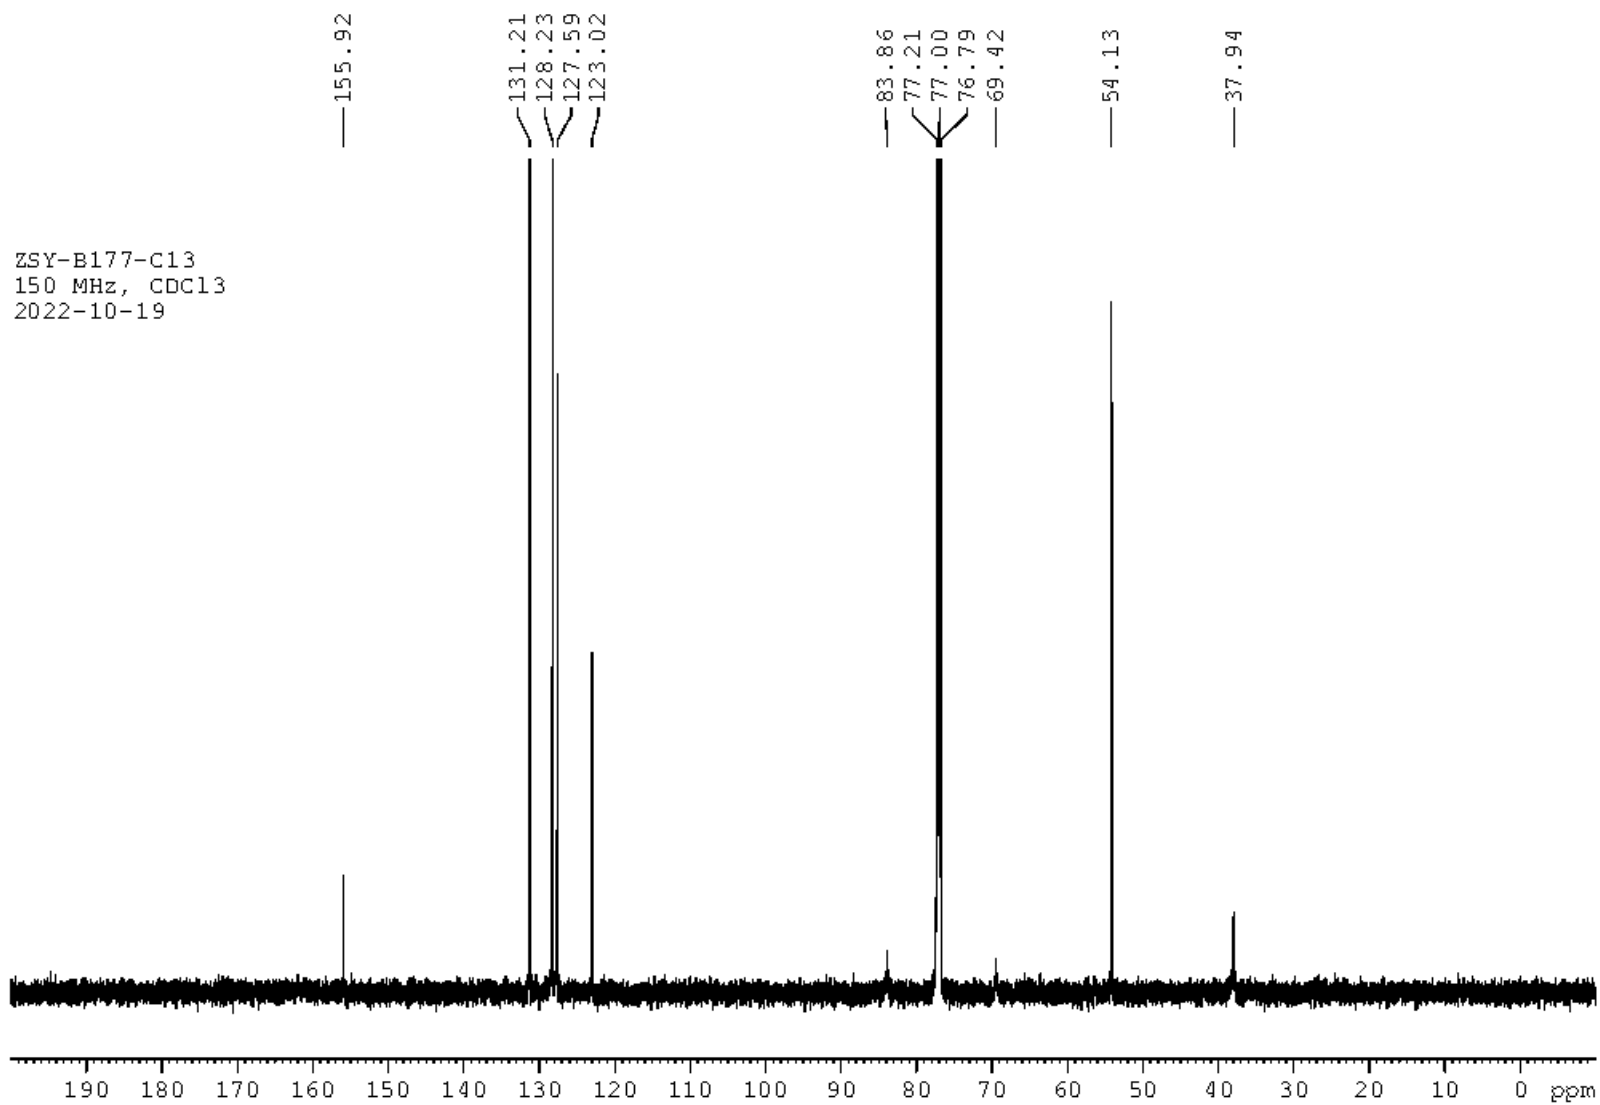

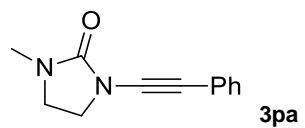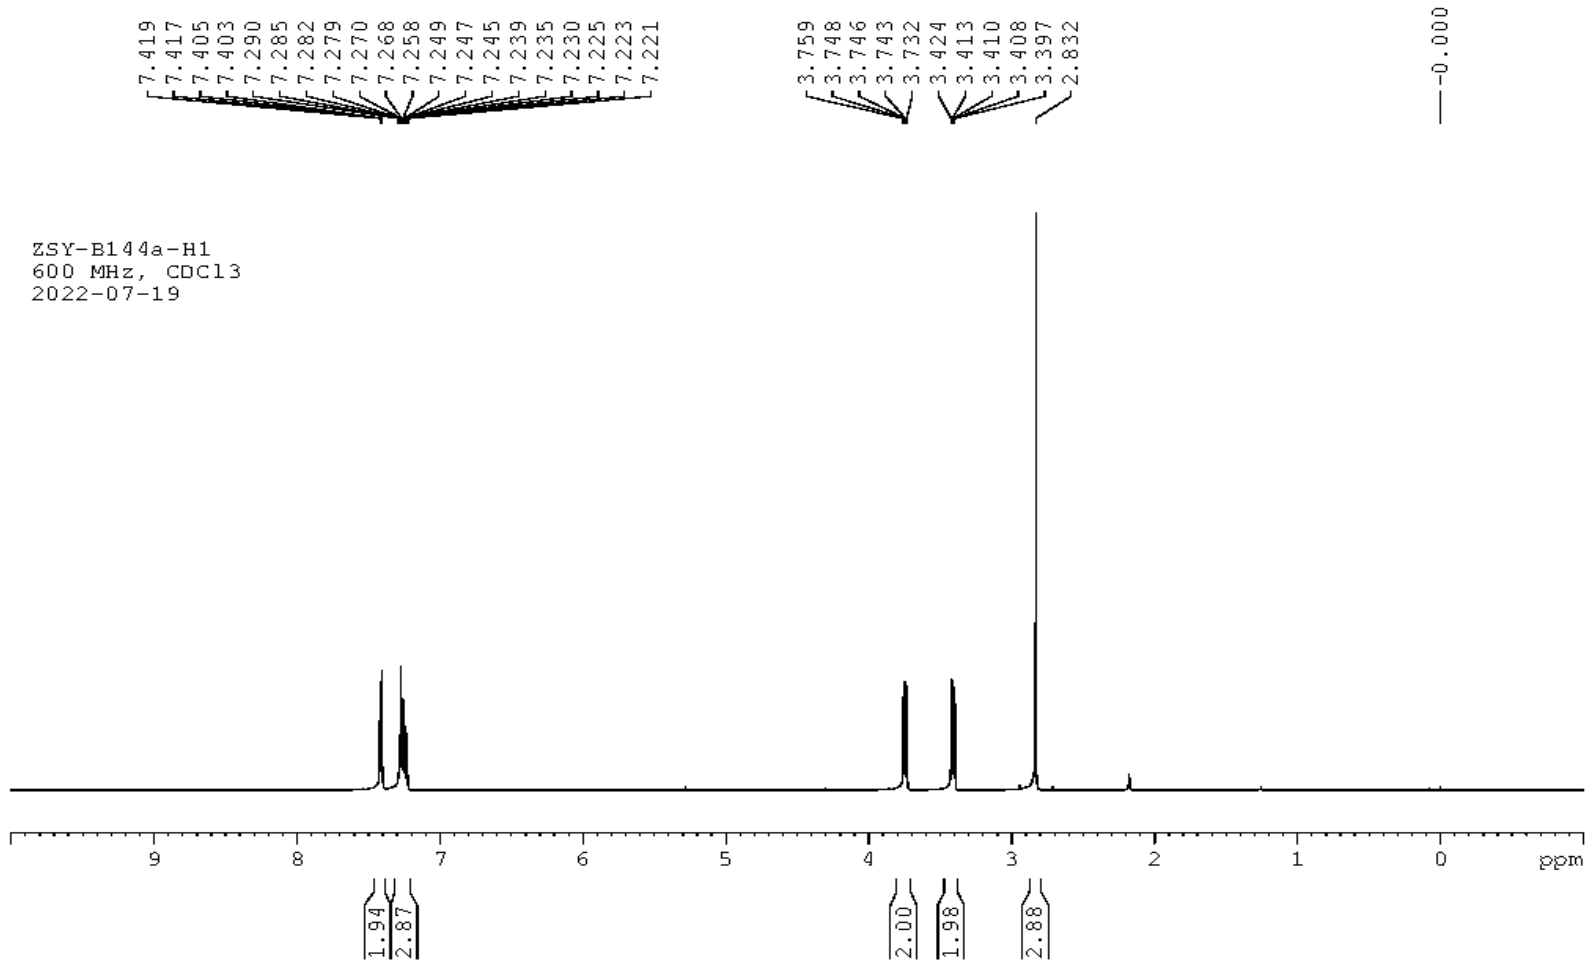

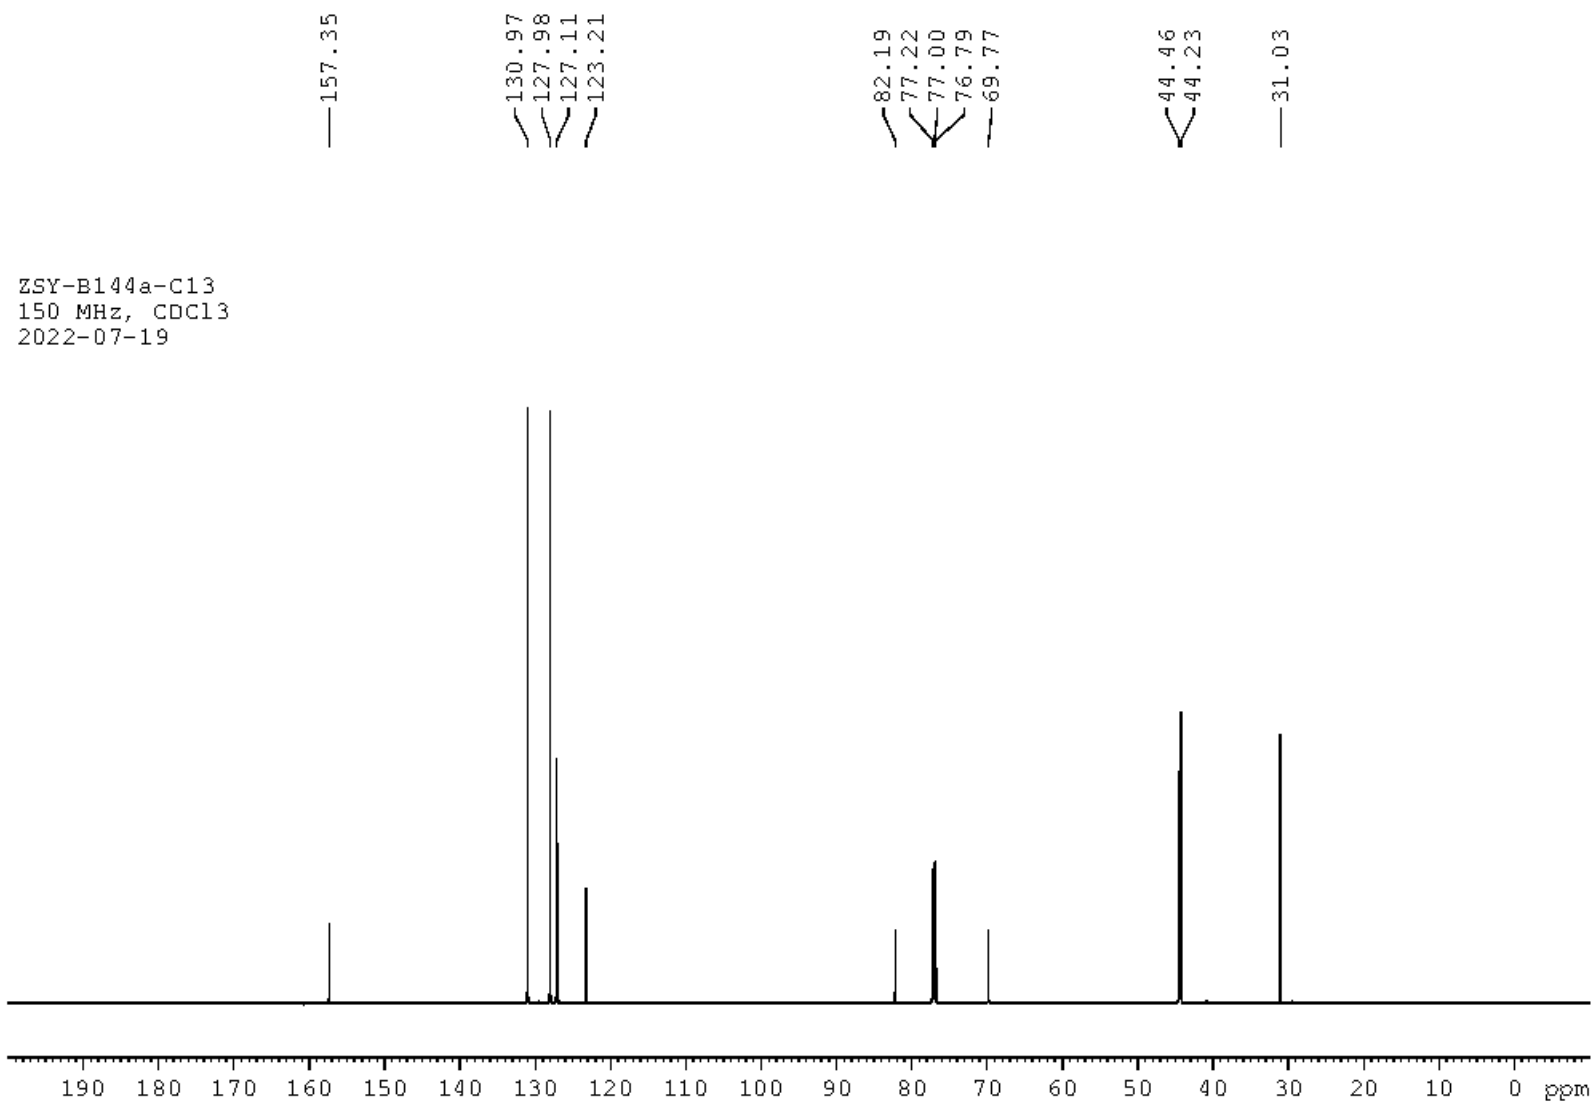

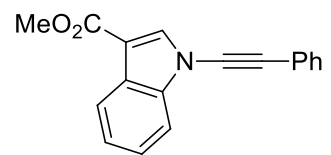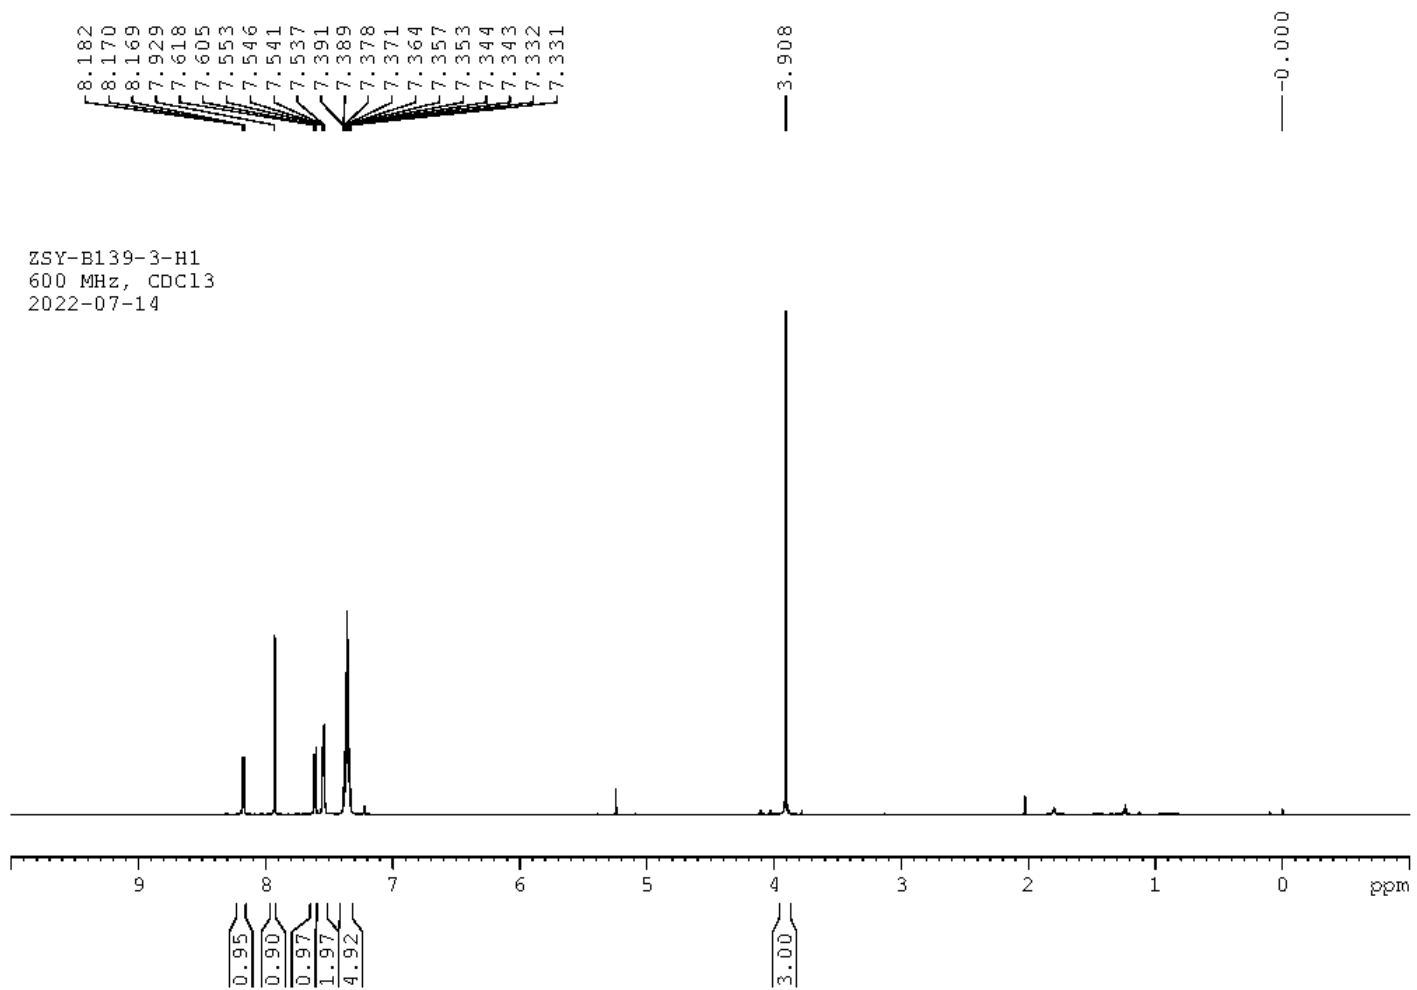

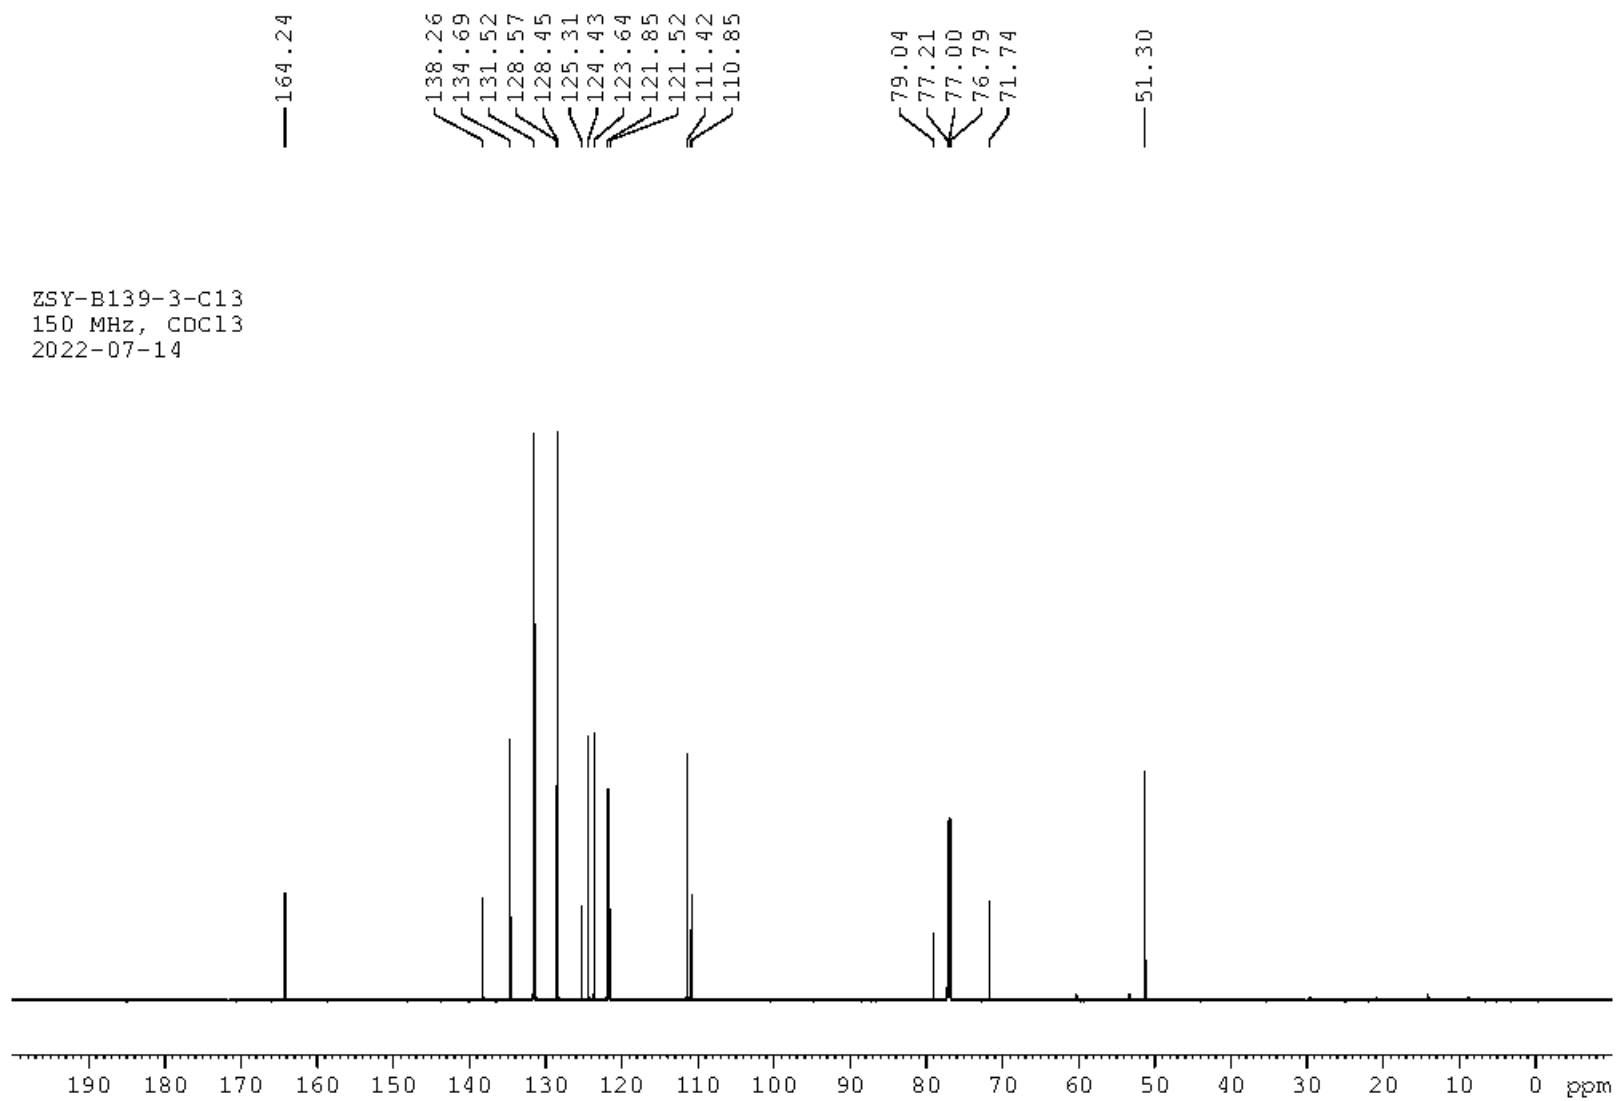

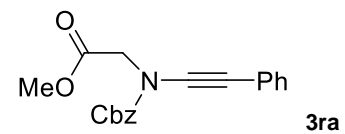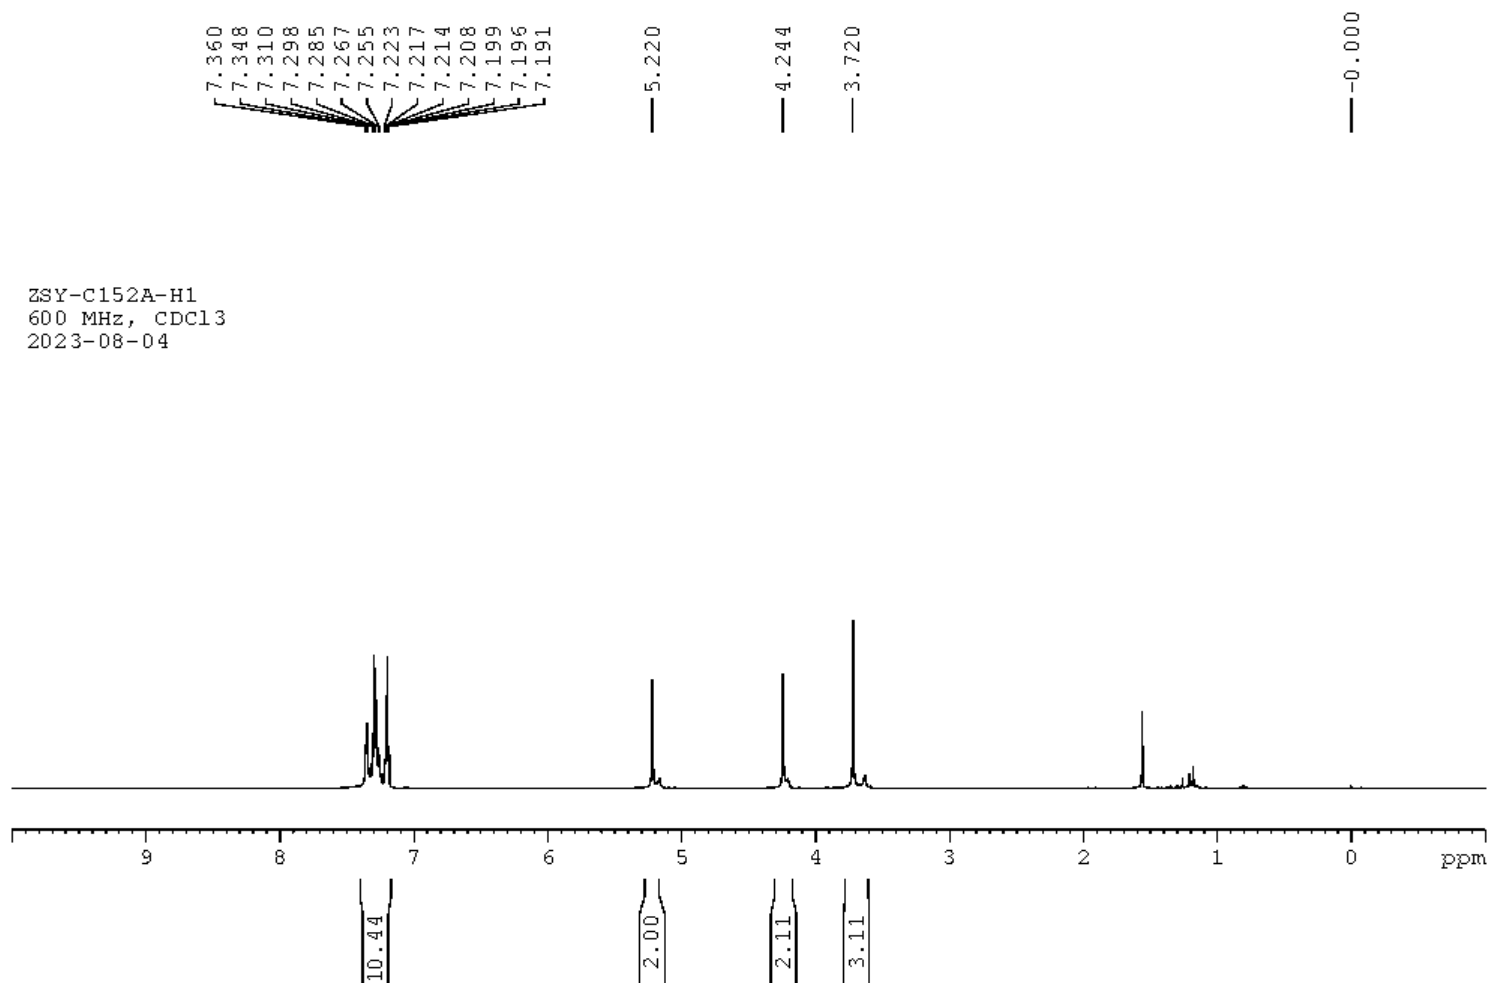



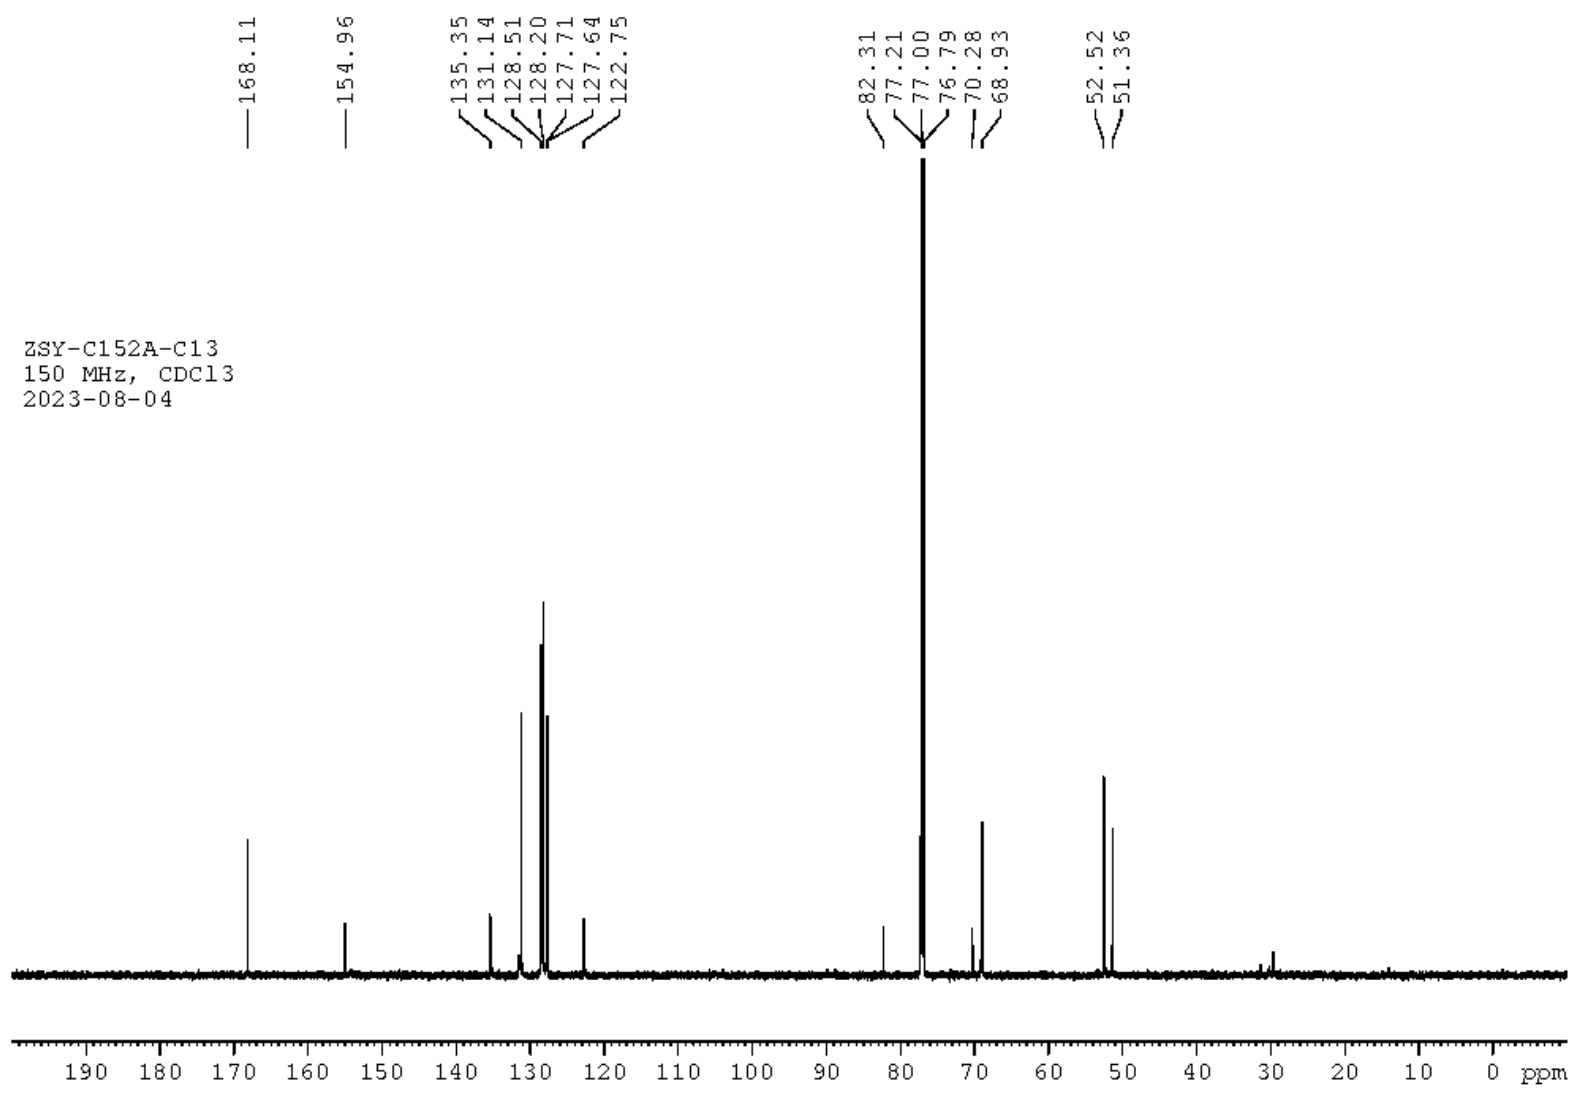

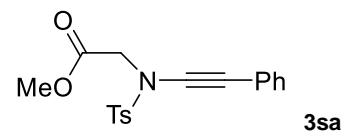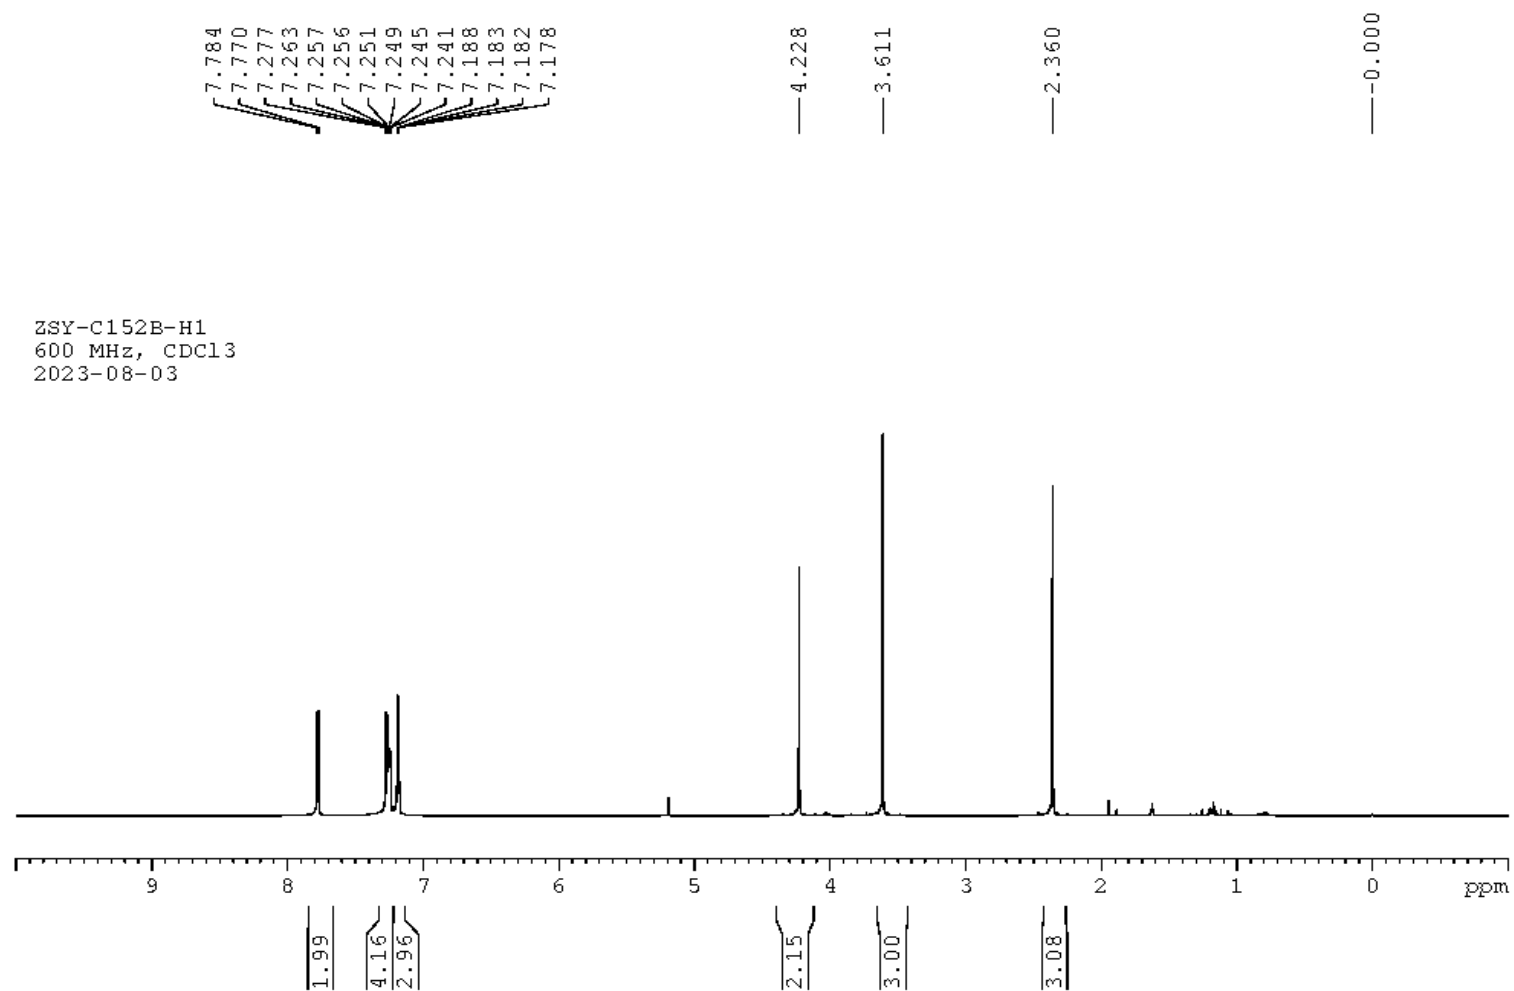

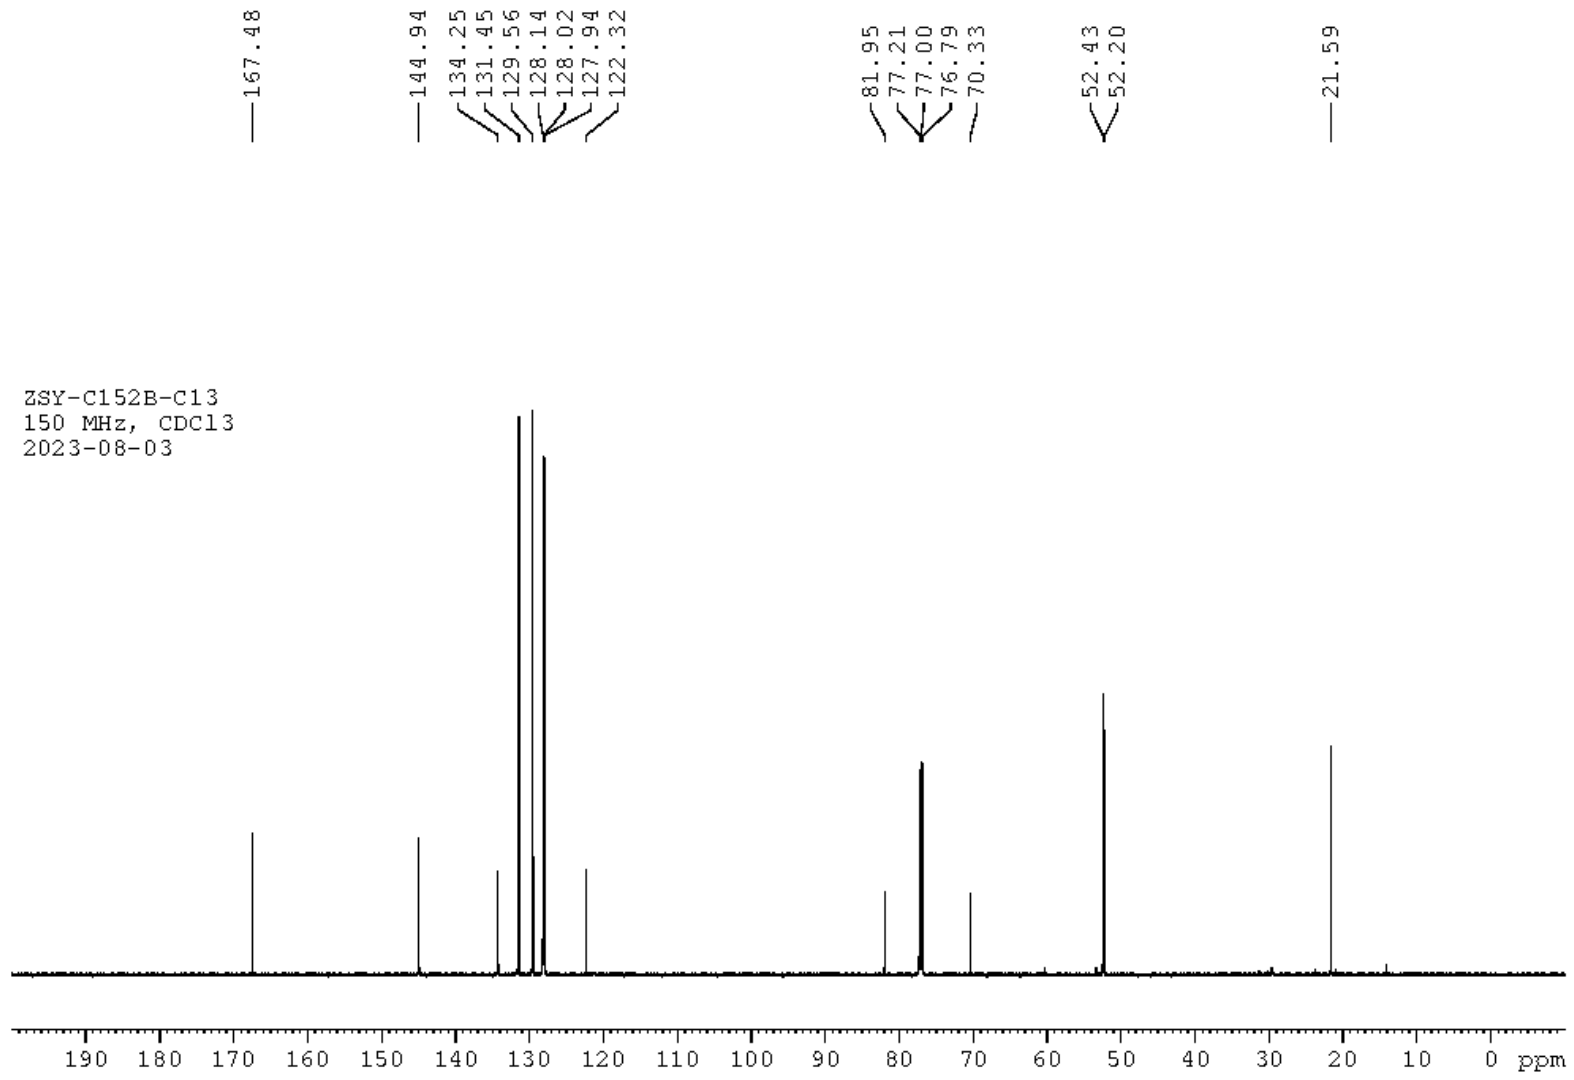

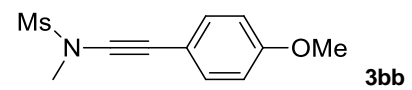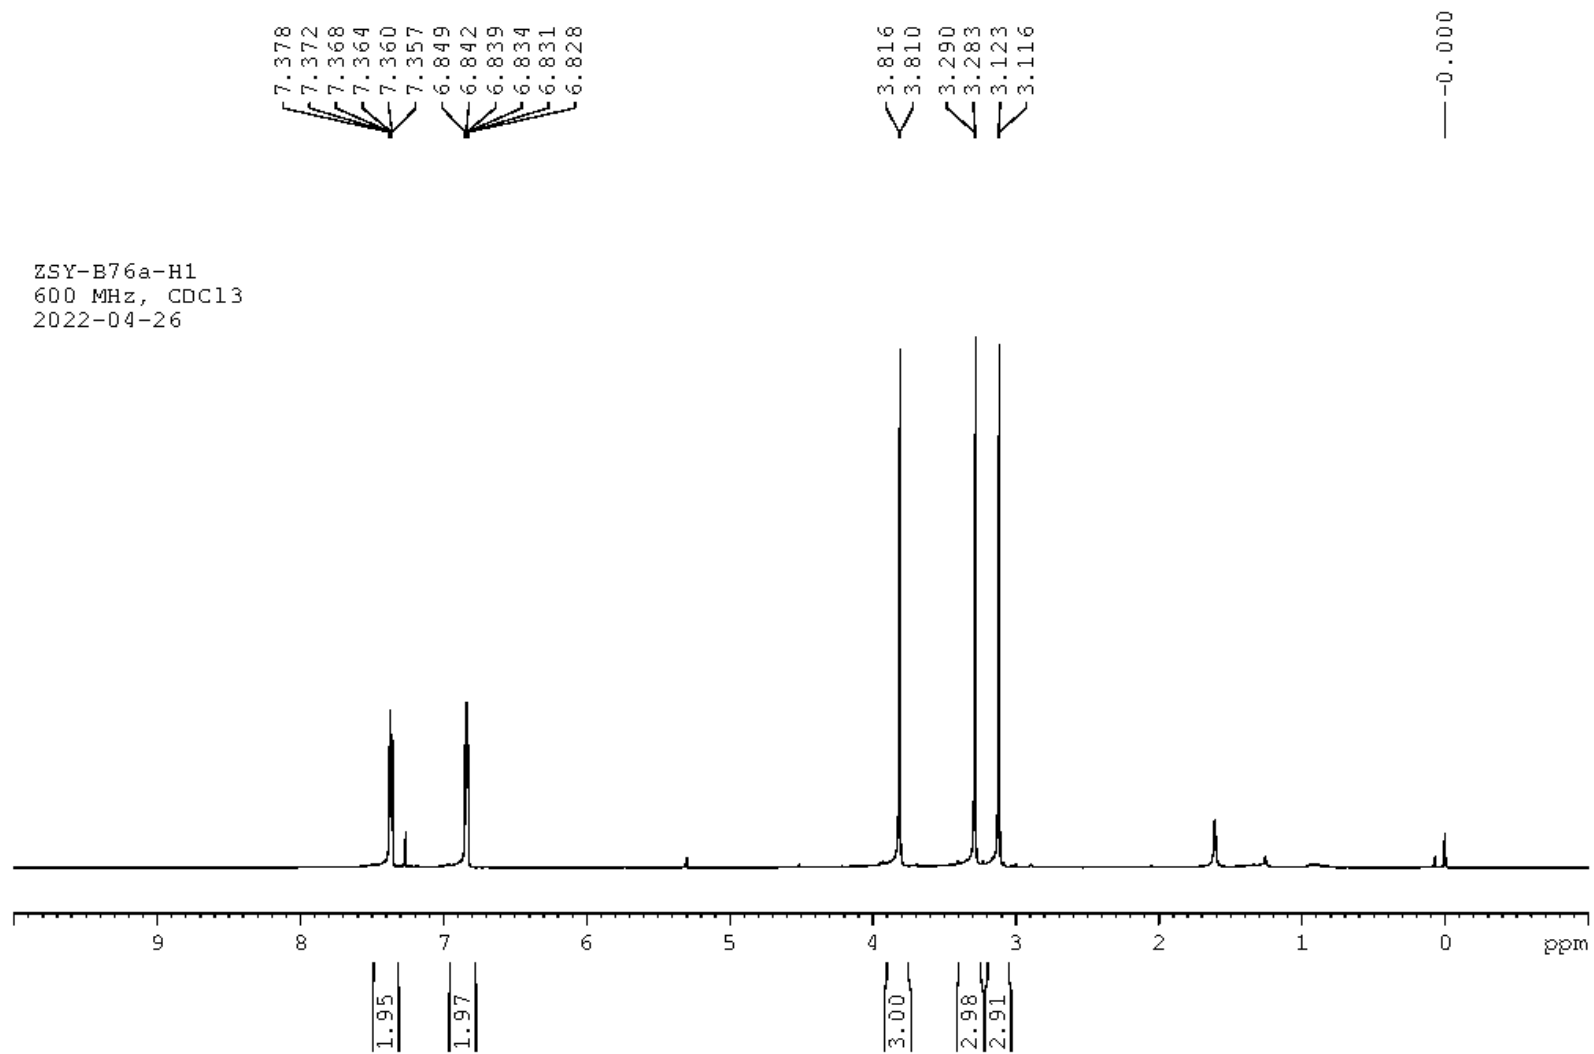

ZSY-B76a-C13  
150 MHz, CDC13  
2022-04-26

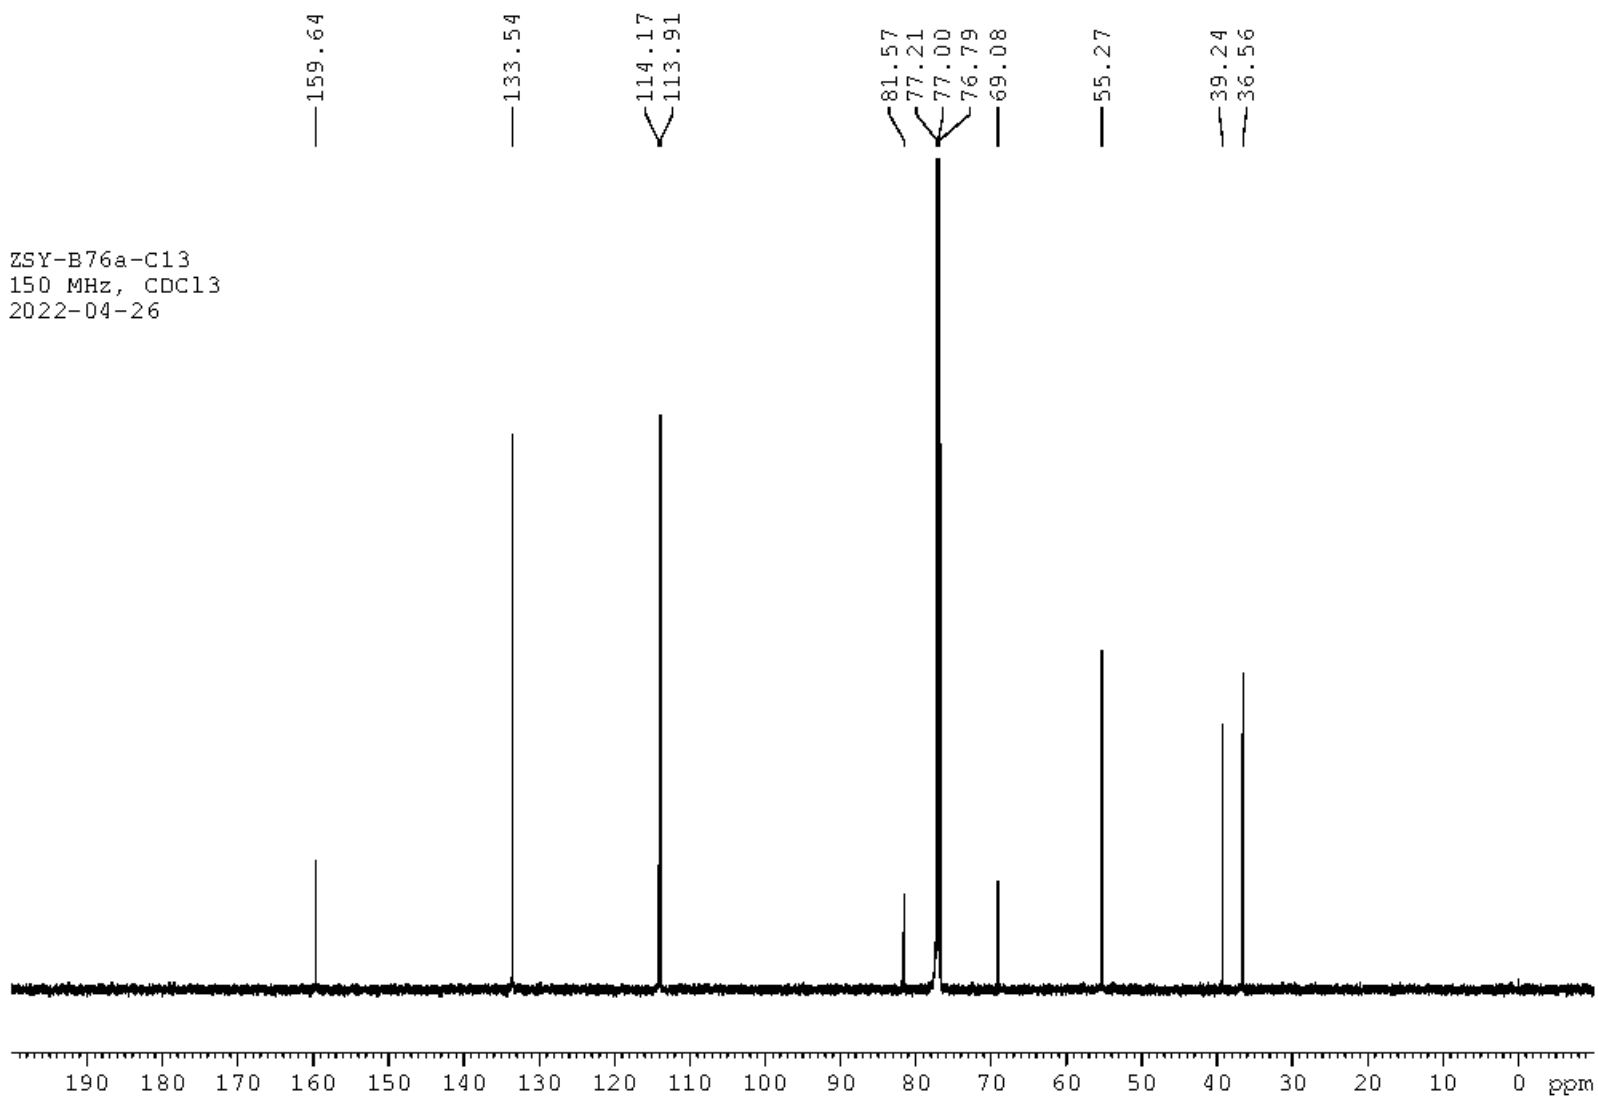

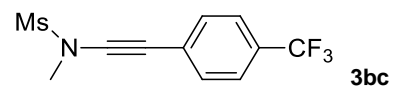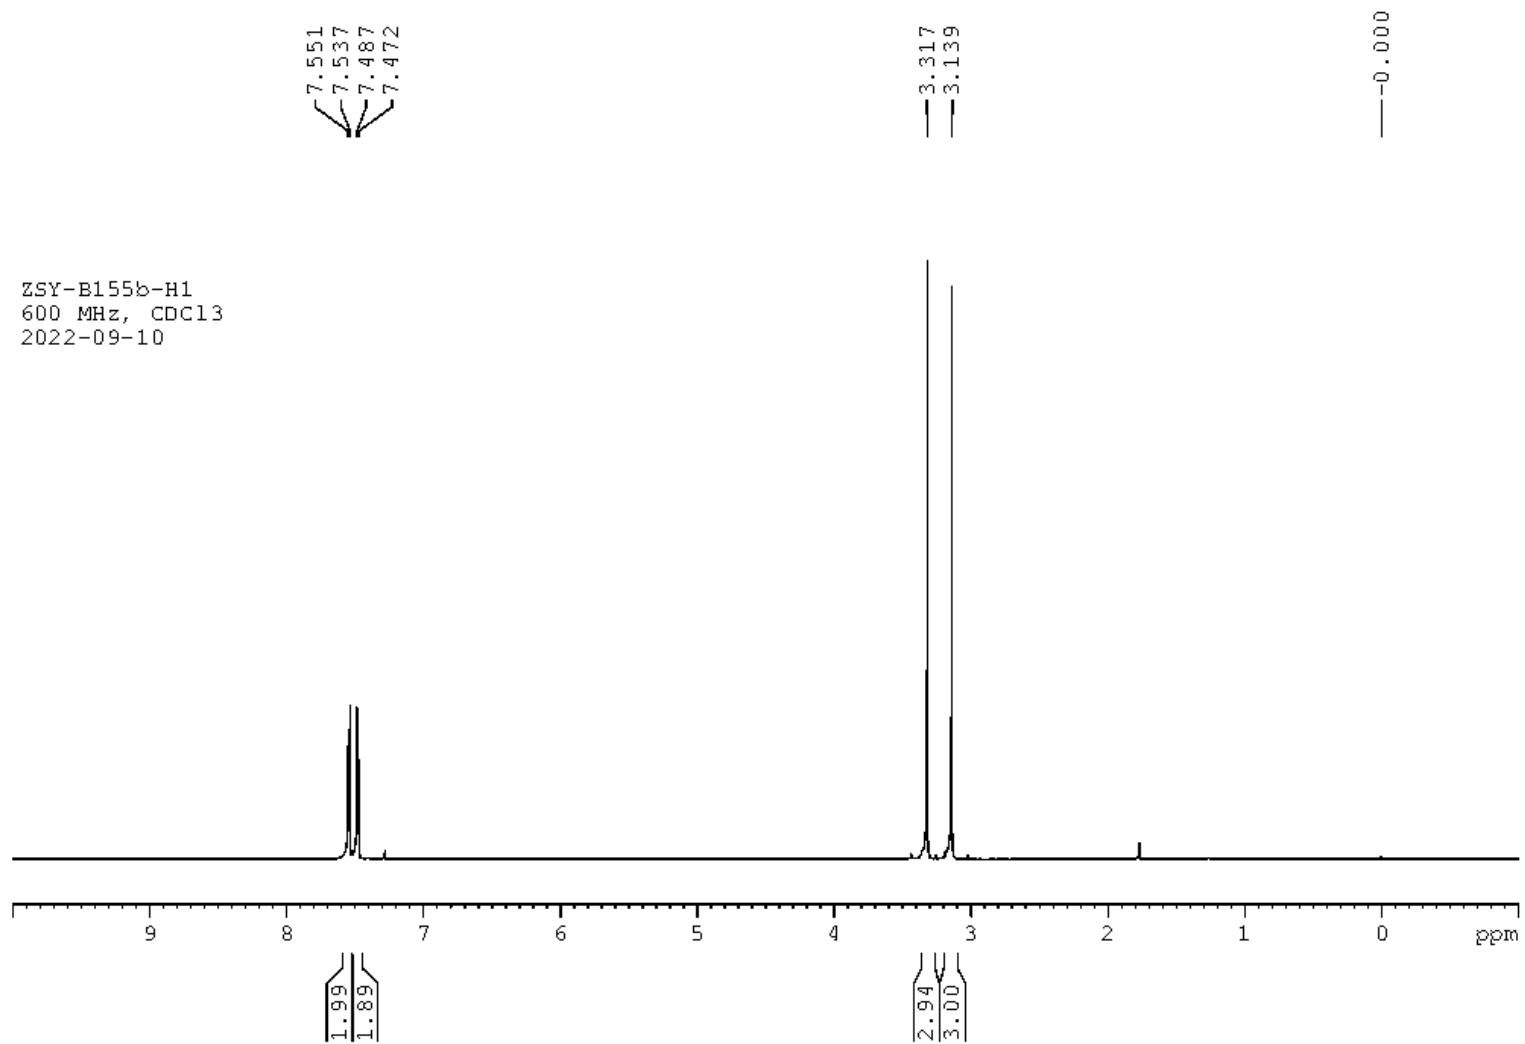

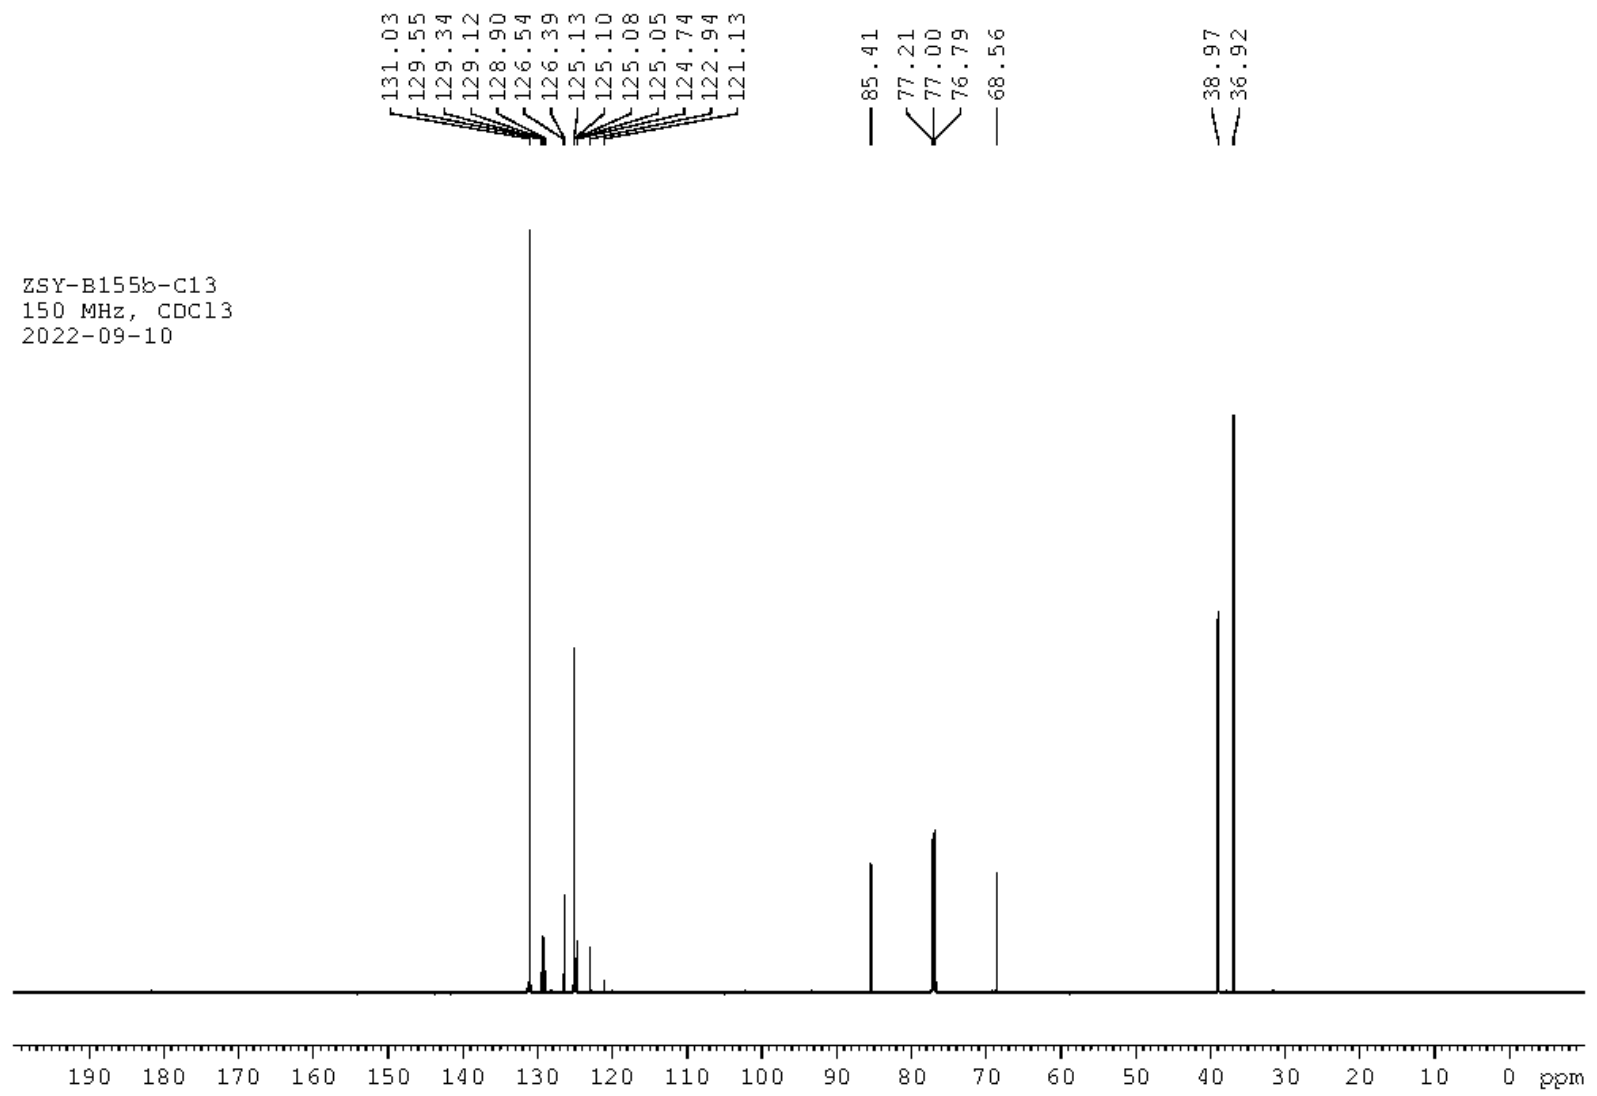

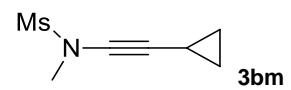

ZSY-B85a-H1  
600 MHz, CDCl<sub>3</sub>  
2022-04-28

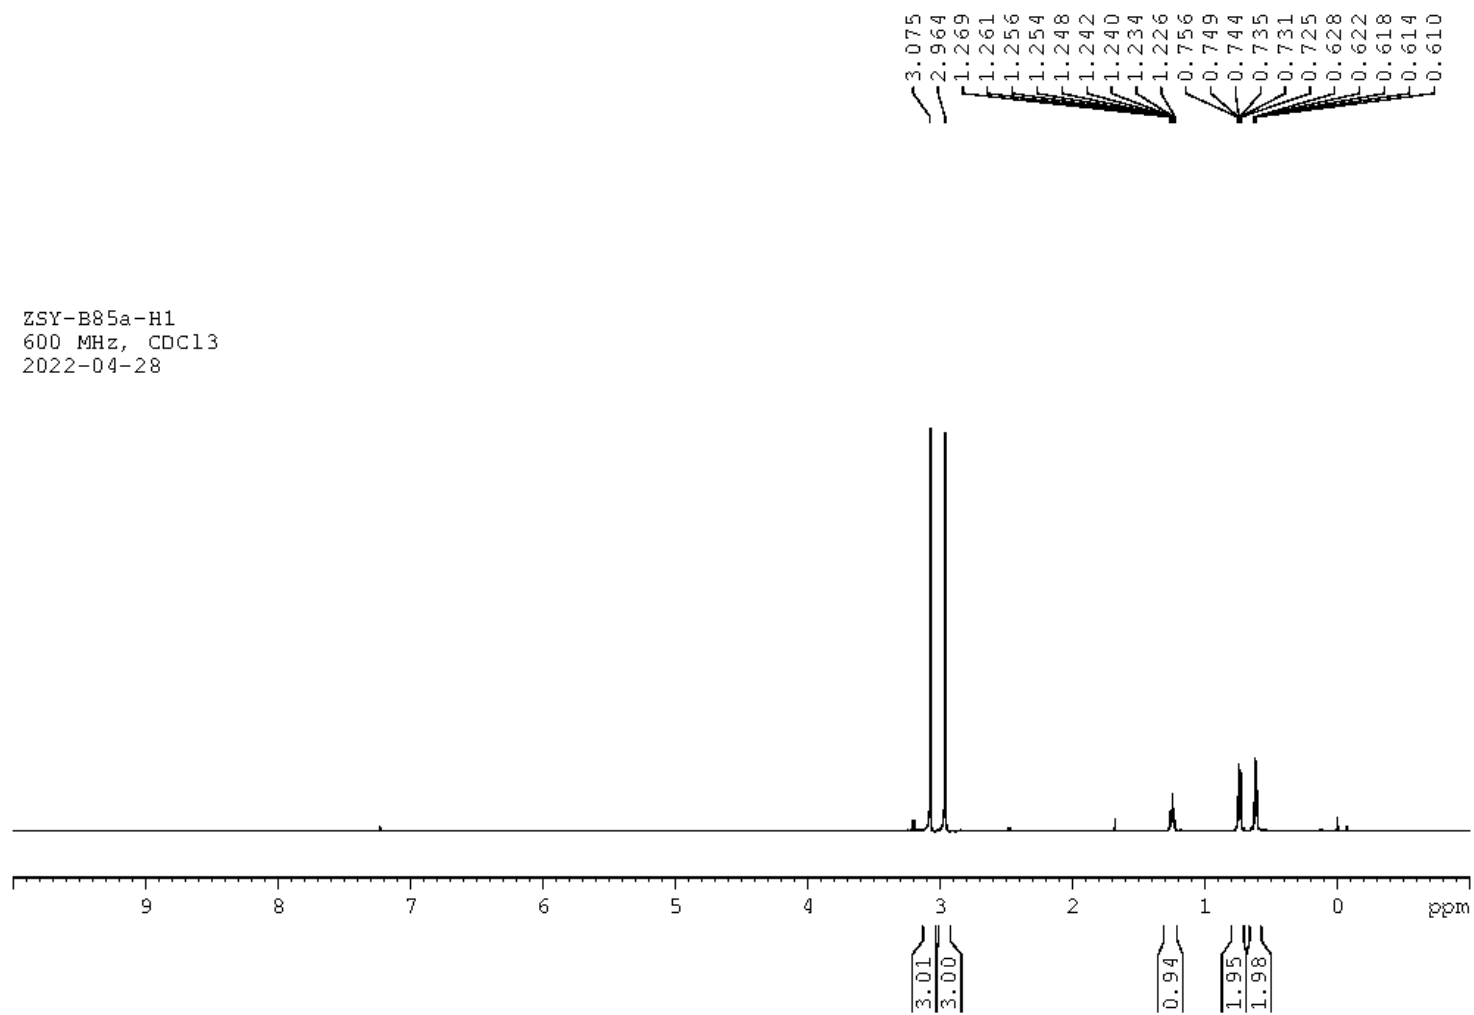



ZSY-B85a-C13  
150 MHz, CDCl3  
2022-04-28

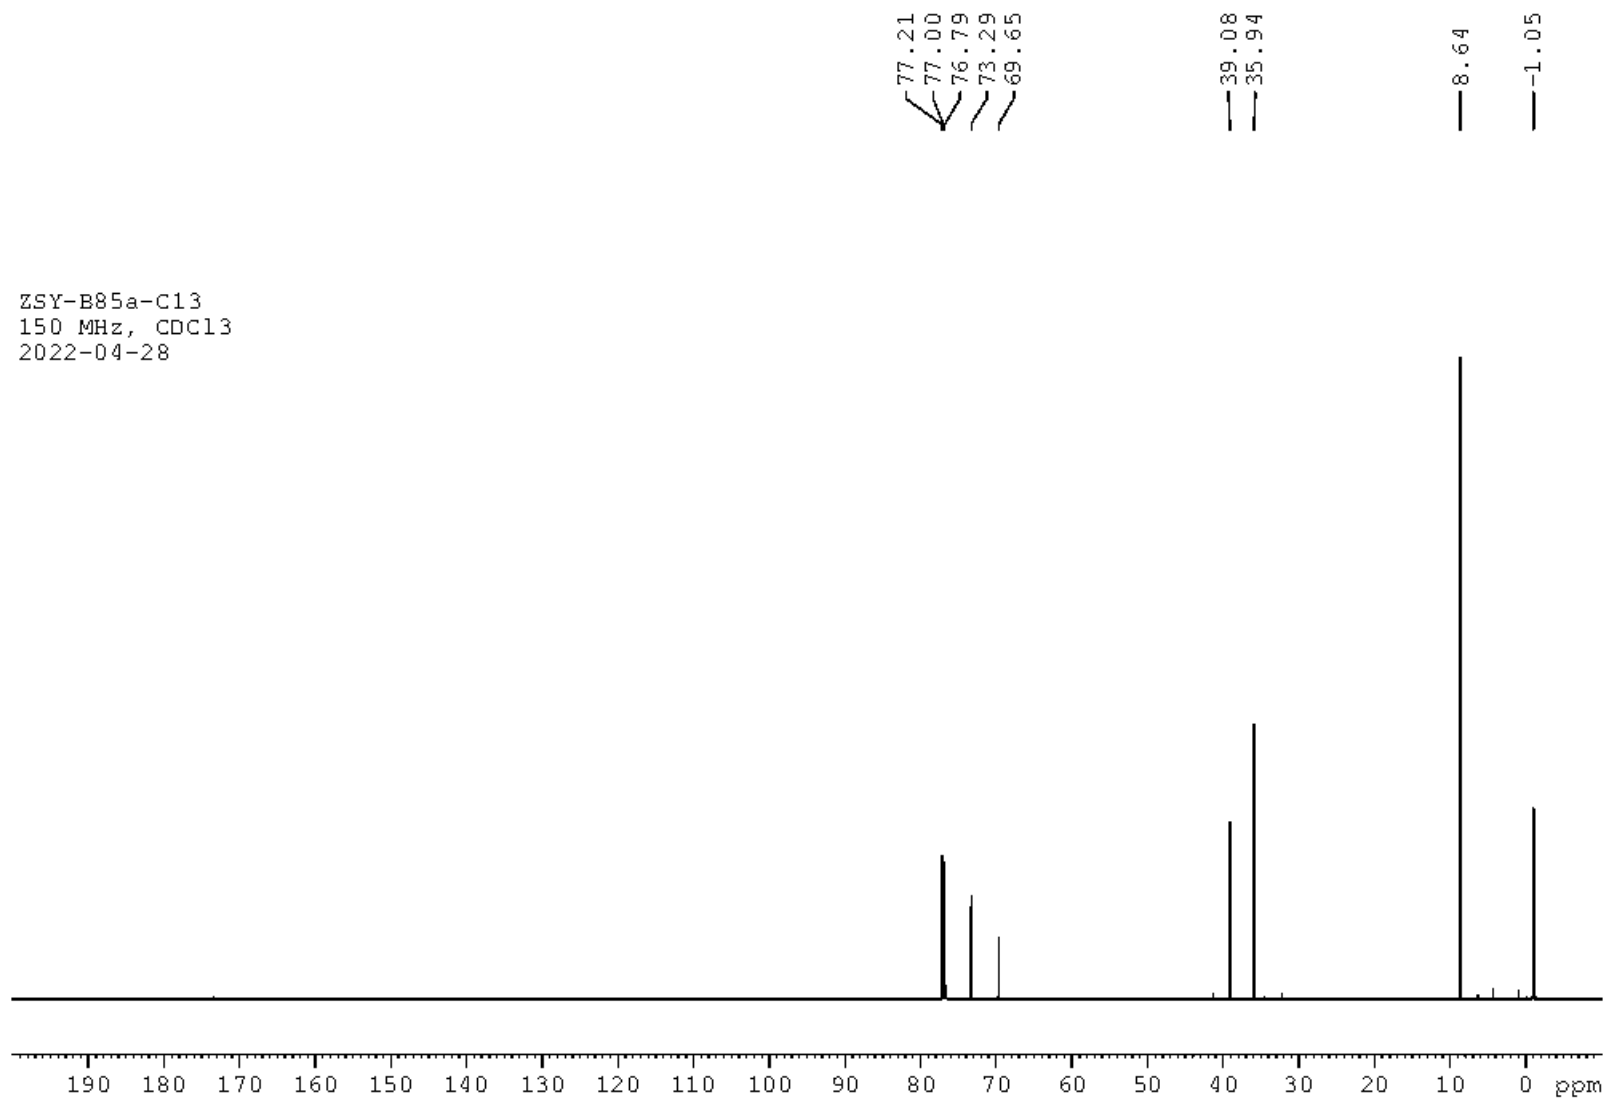

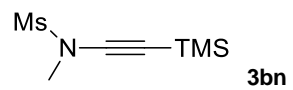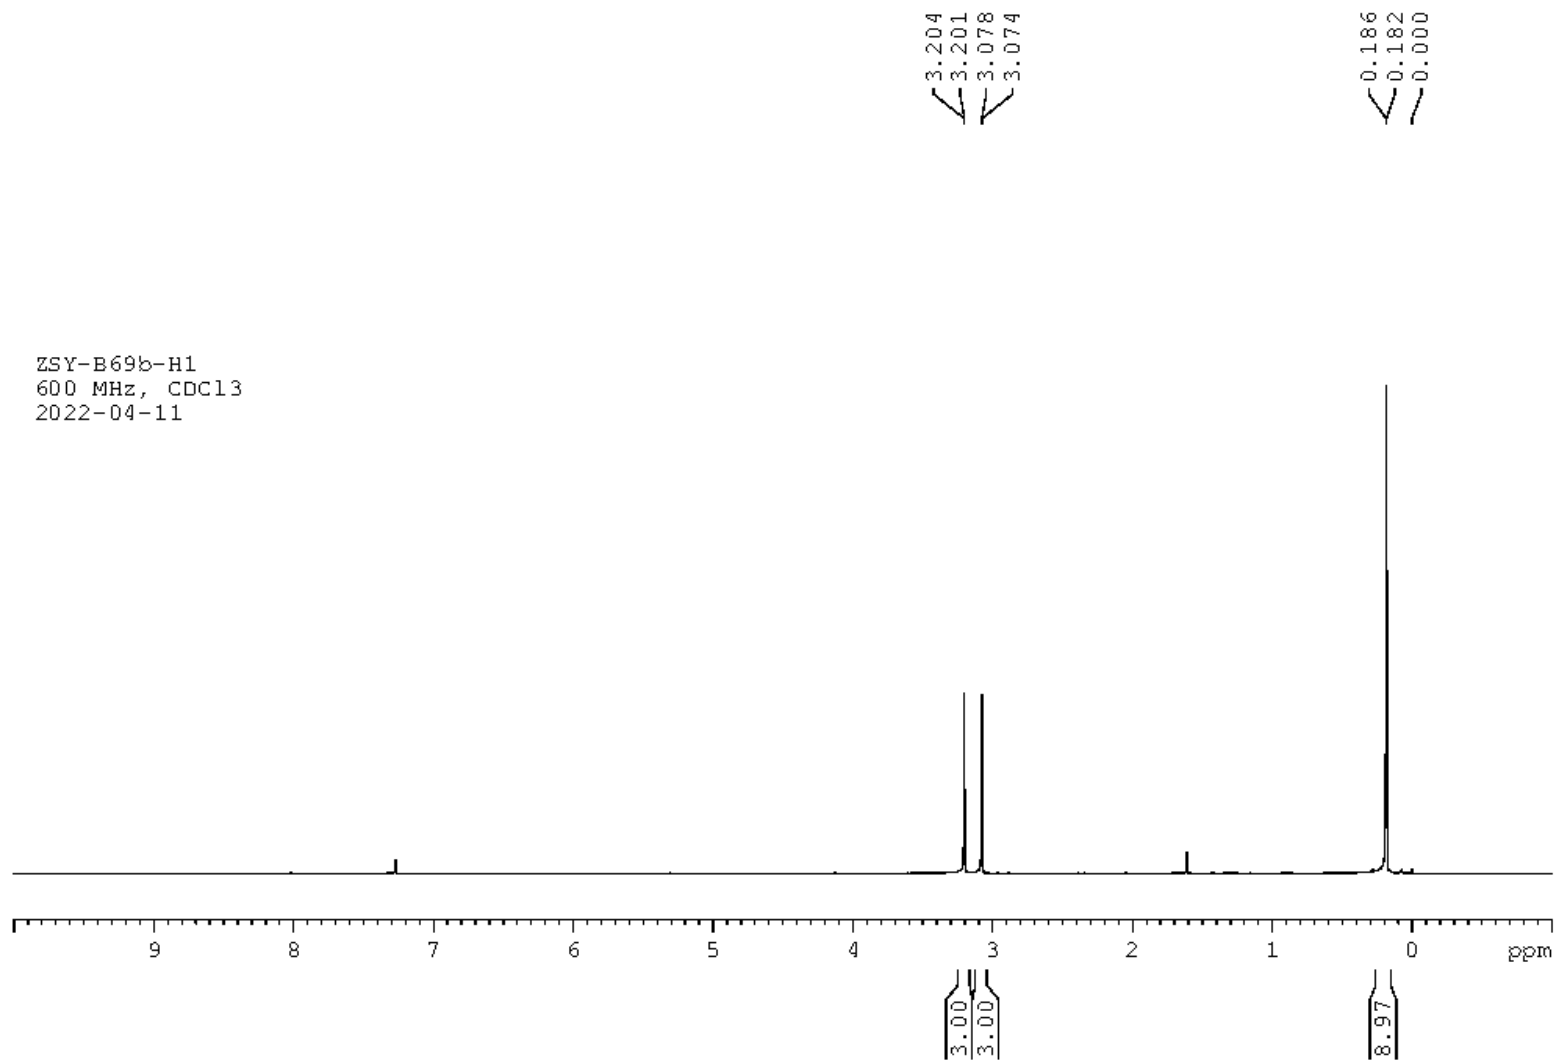

ZSY-B69b-C13  
150 MHz, CDCl<sub>3</sub>  
2022-04-11

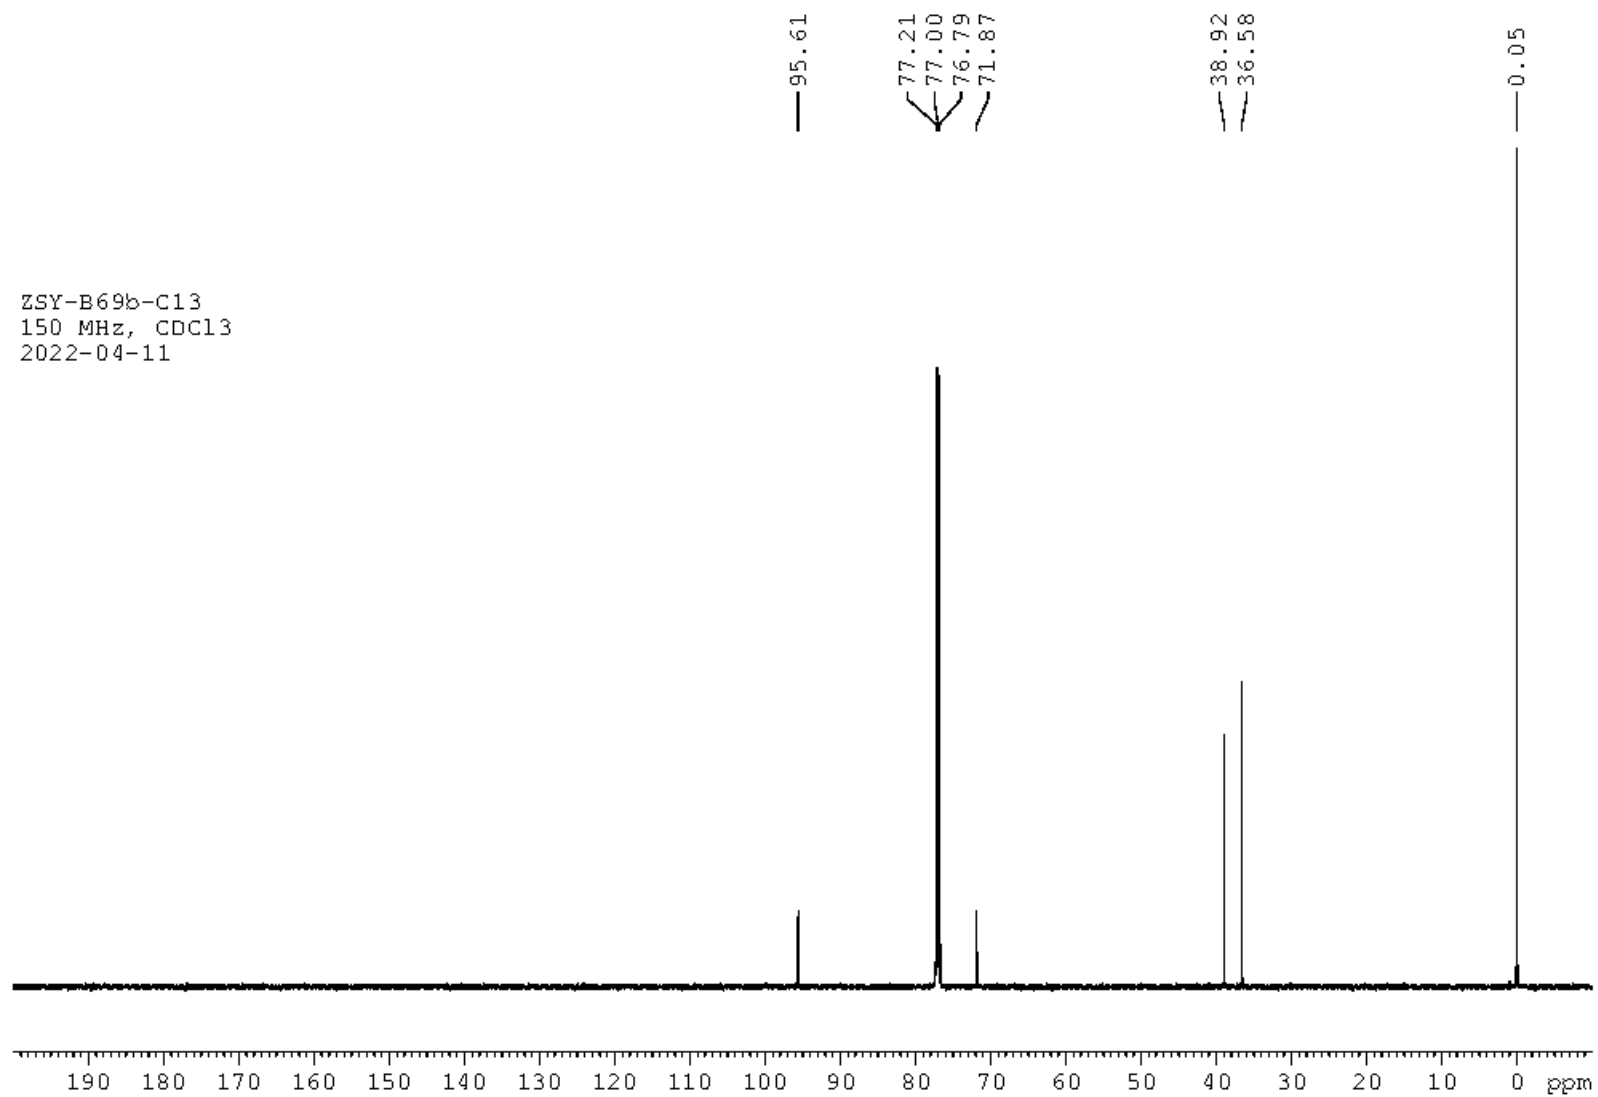

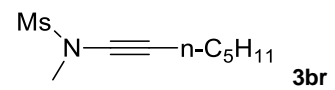

ZSY-B92a-H1  
600 MHz, CDCl<sub>3</sub>  
2022-05-02

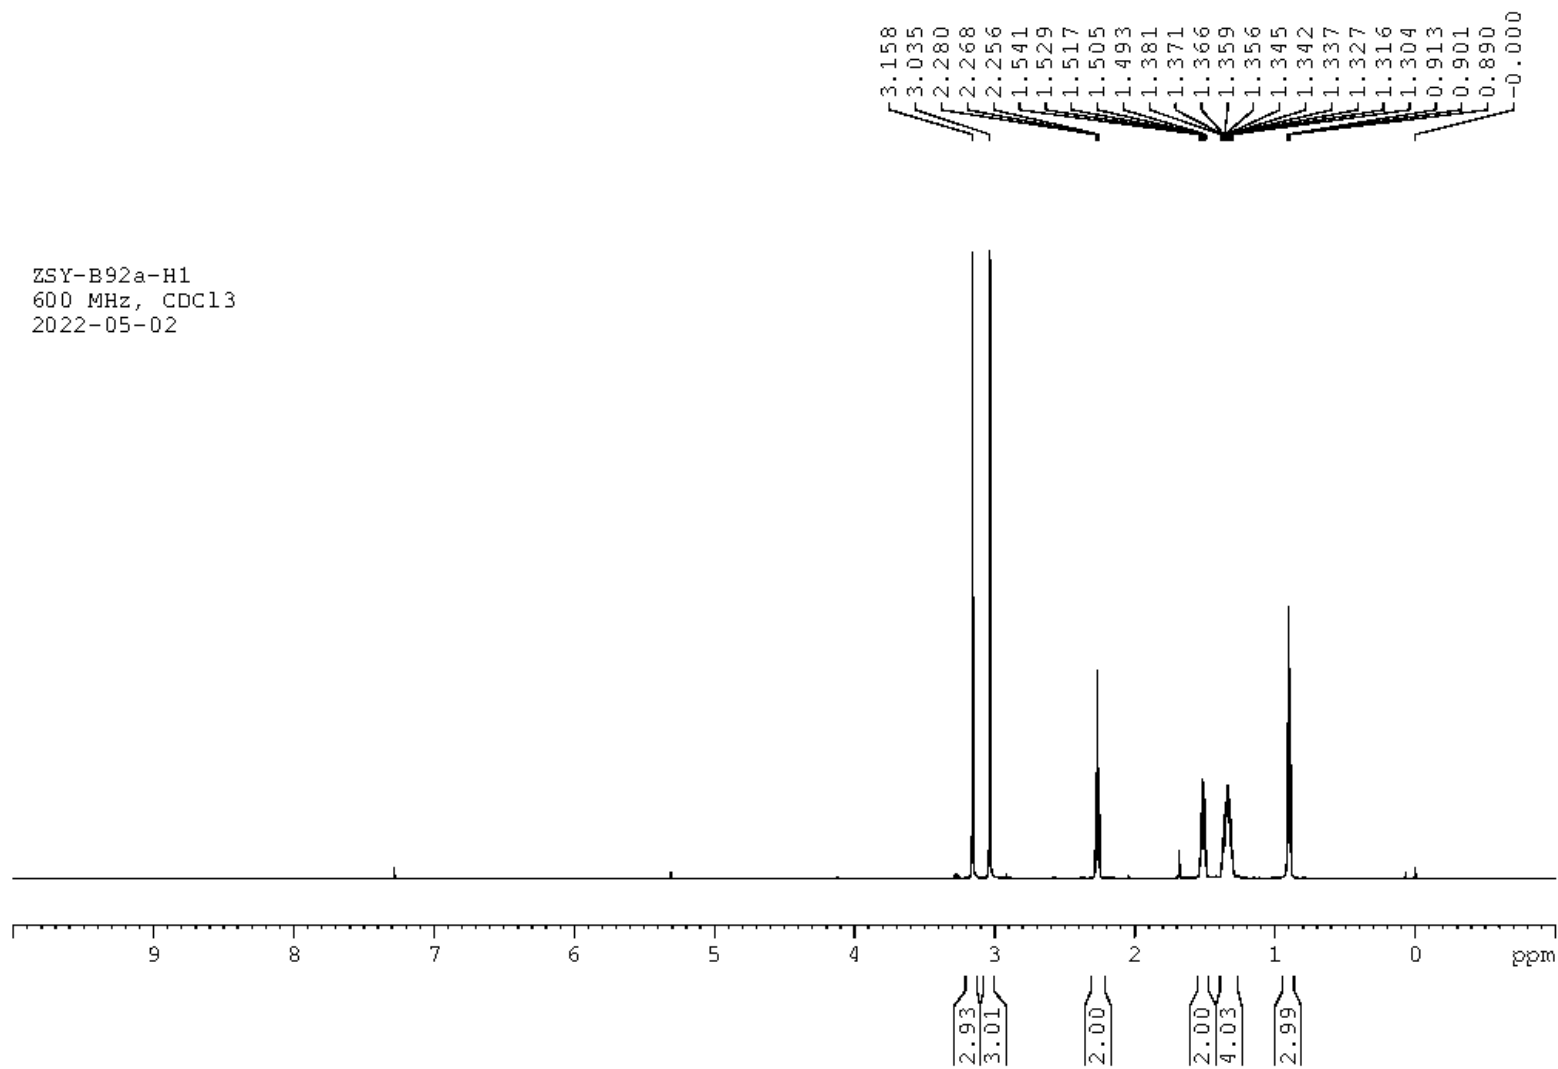

ZSY-B92a-C13  
150 MHz, CDCl3  
2022-05-02

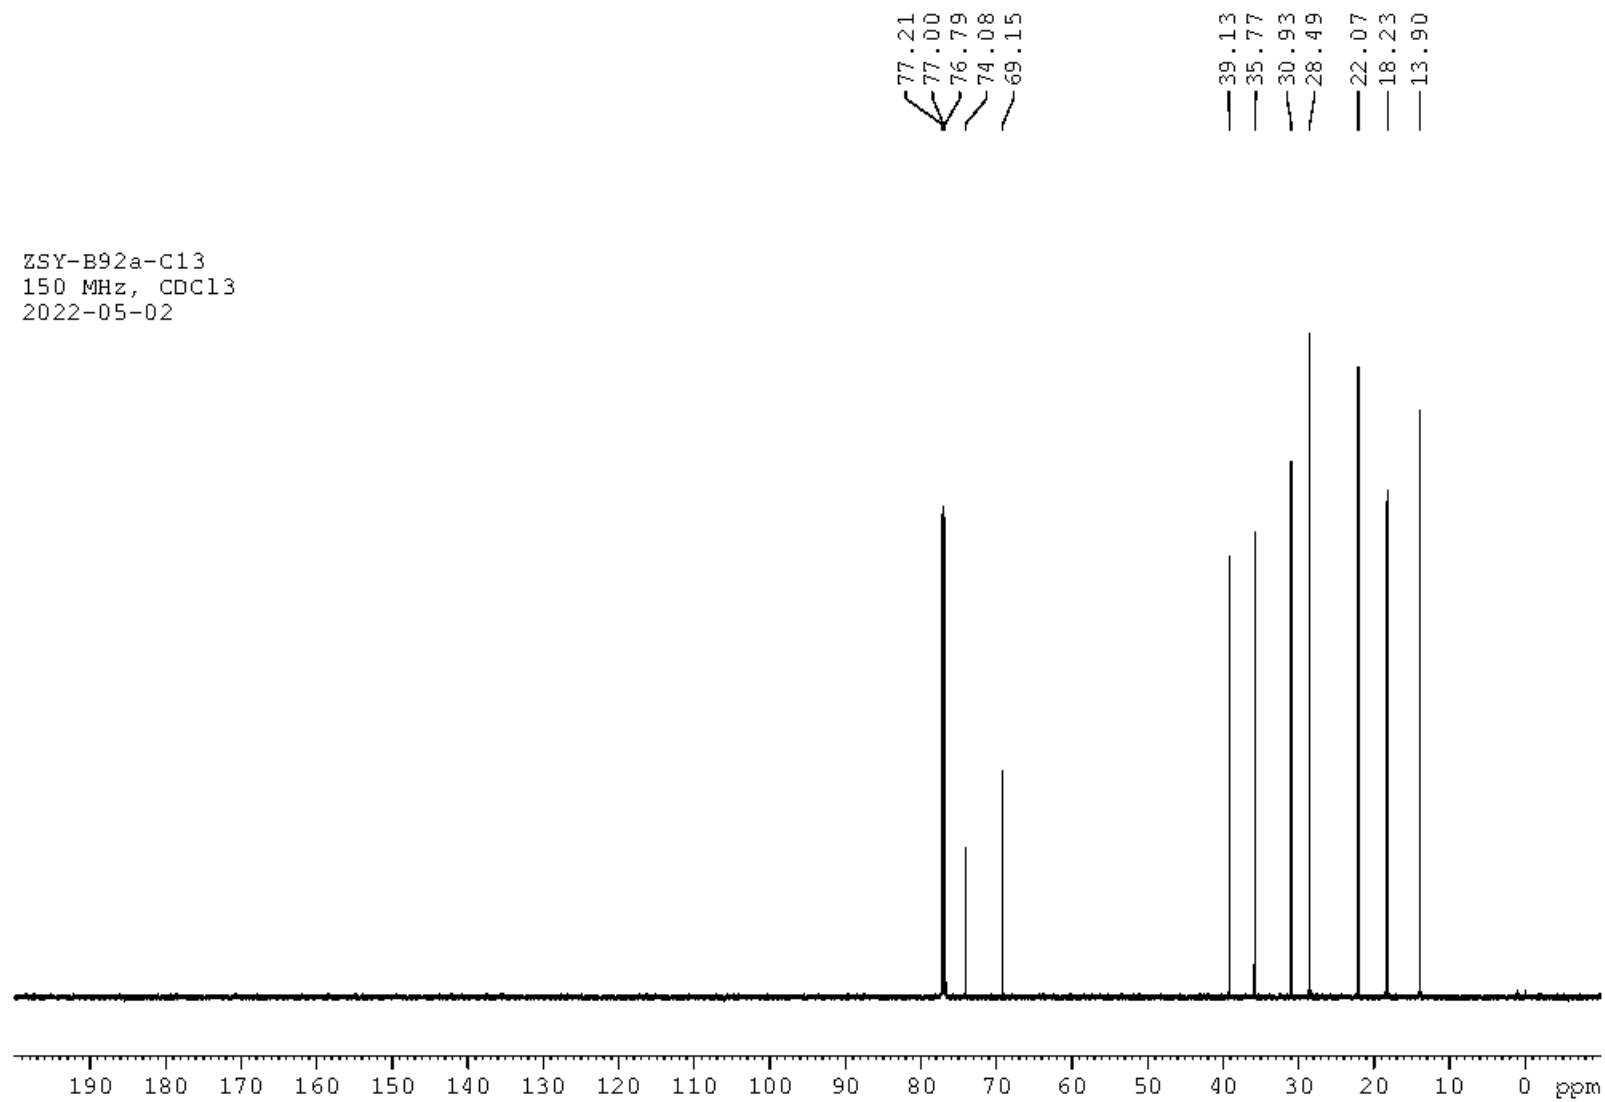

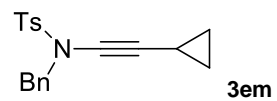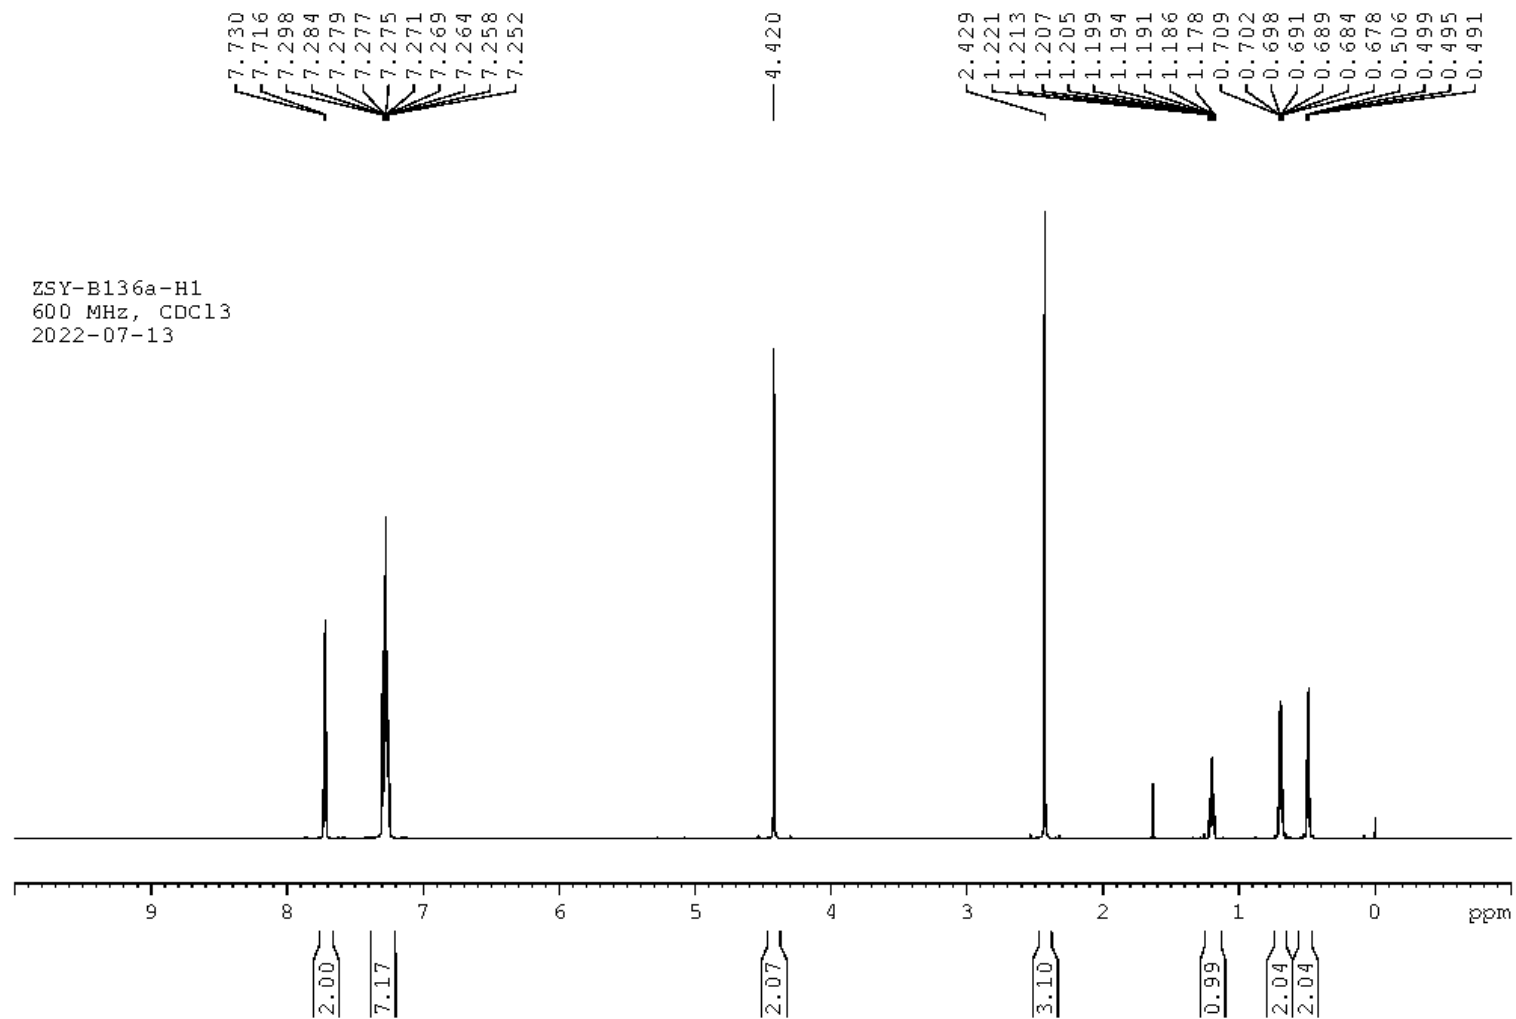

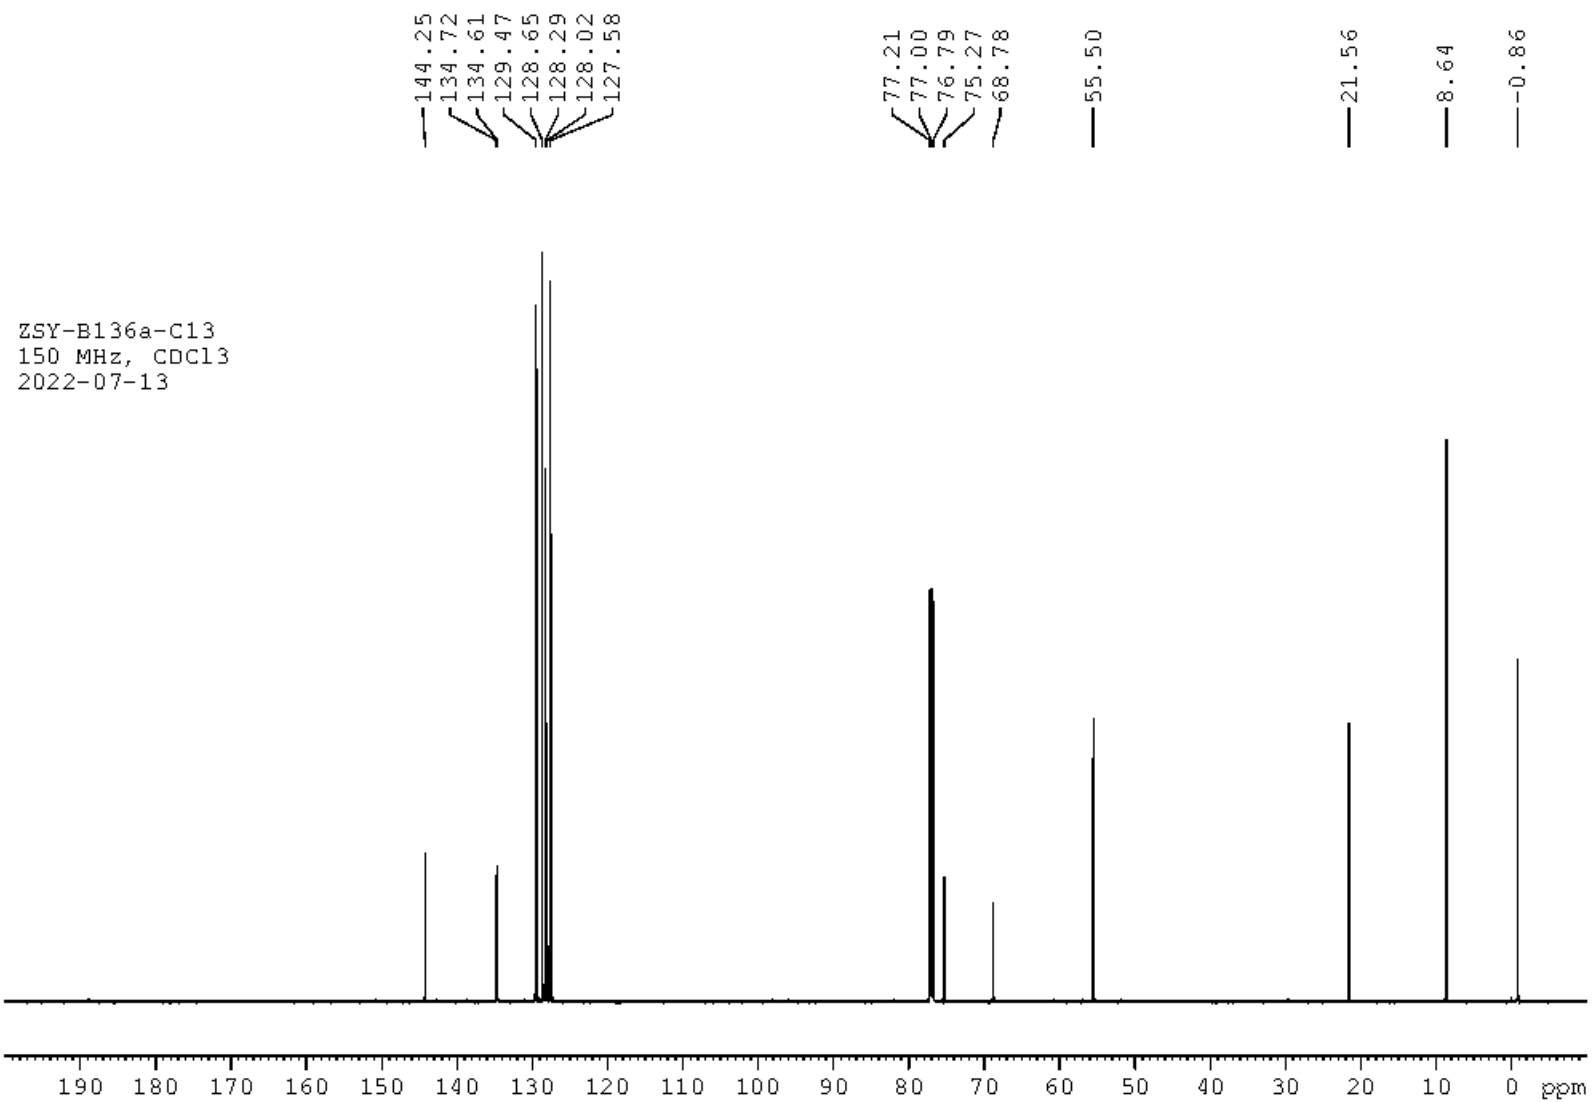

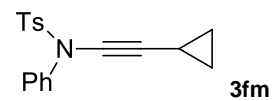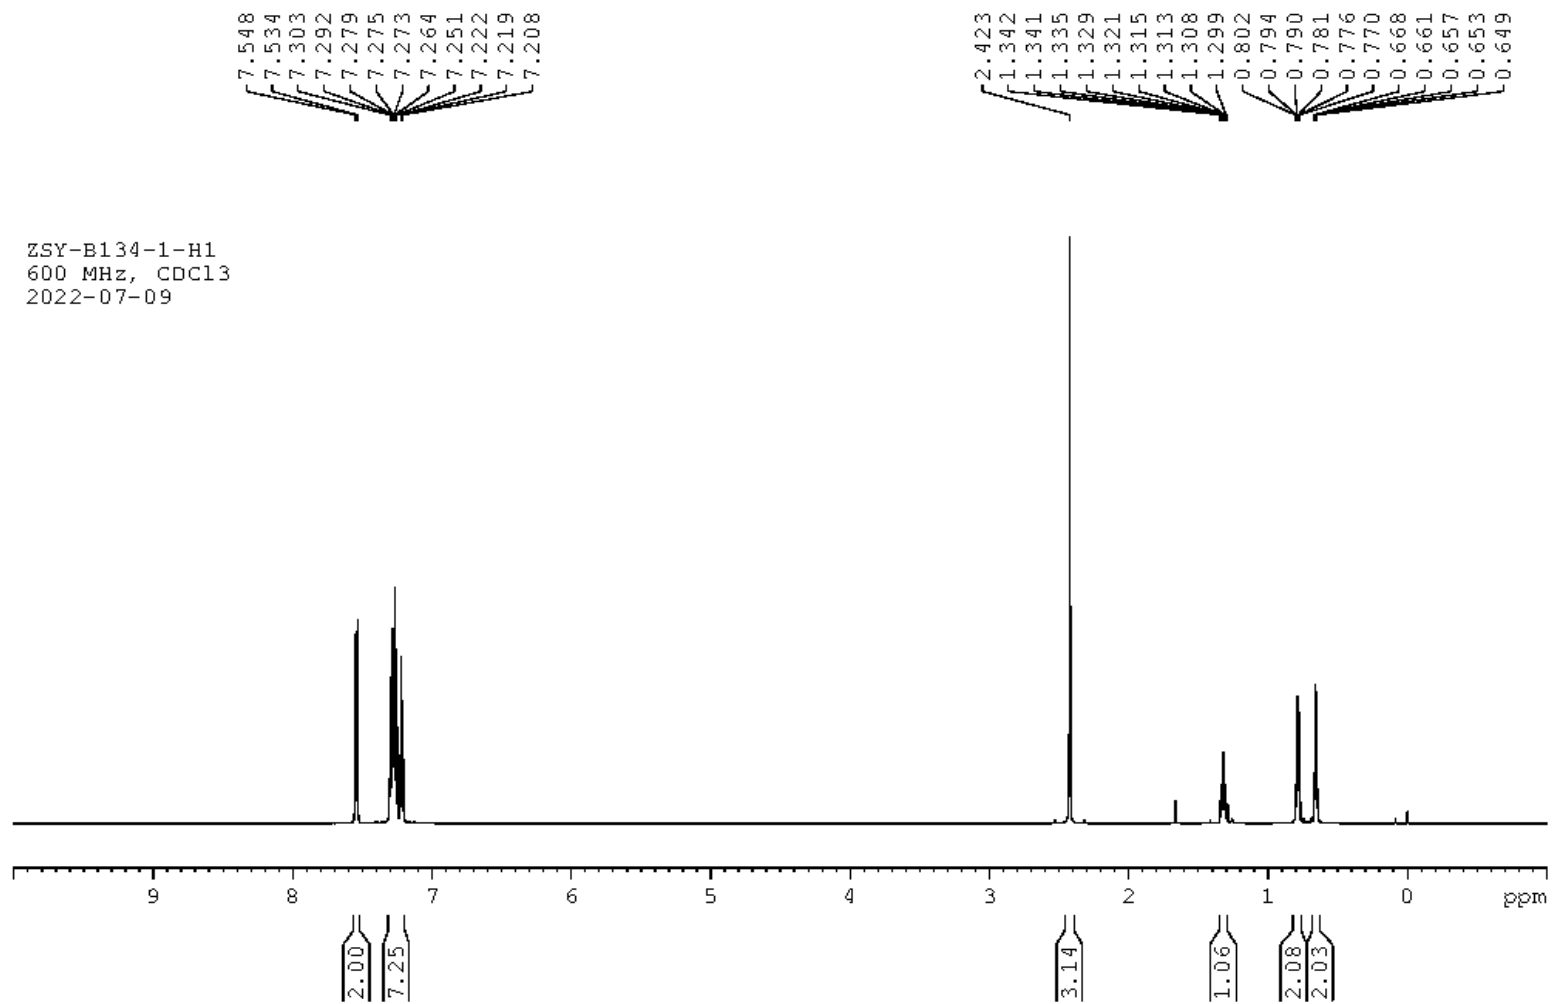



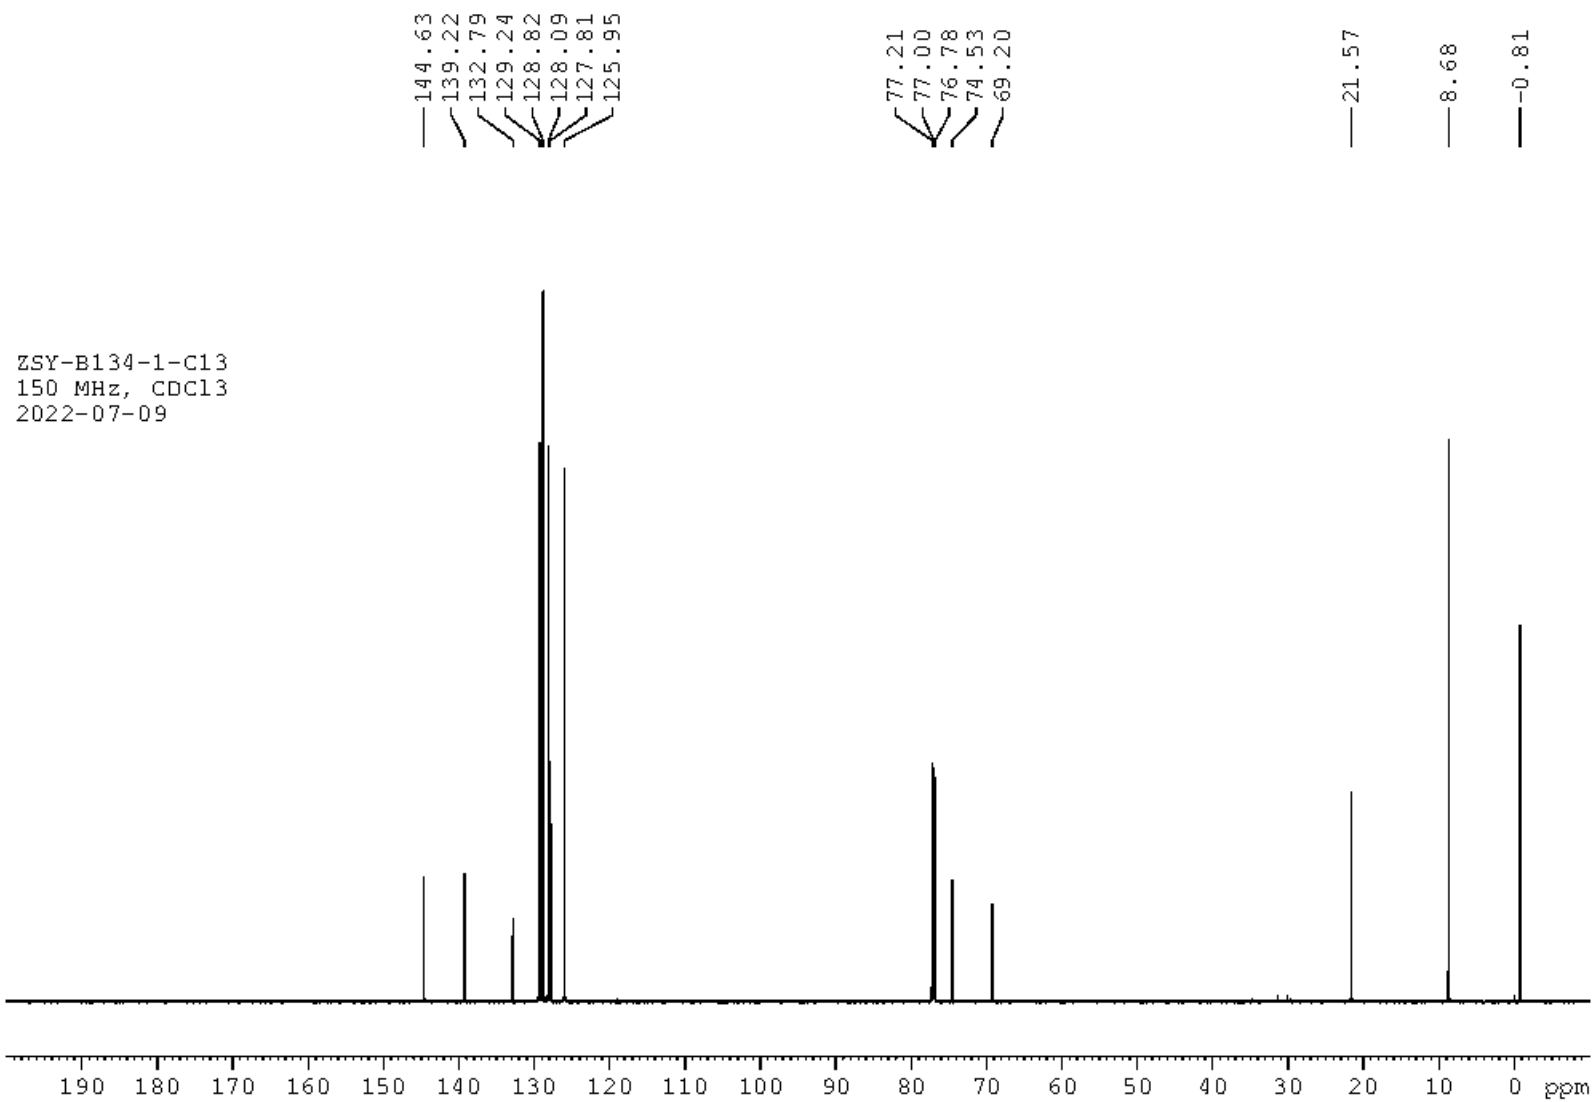

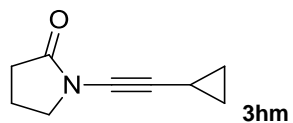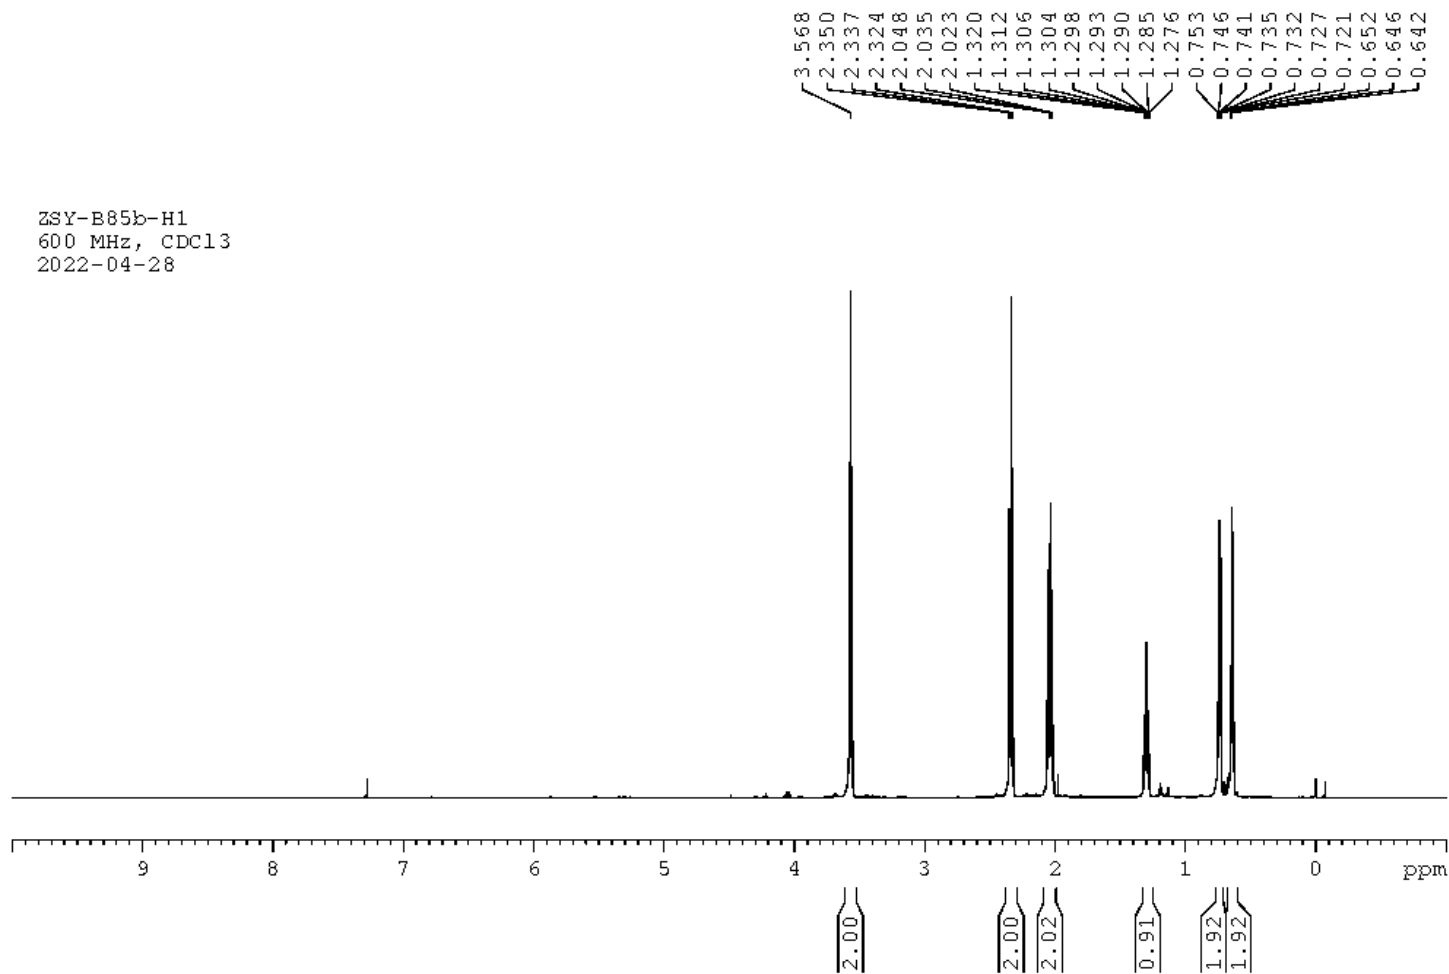

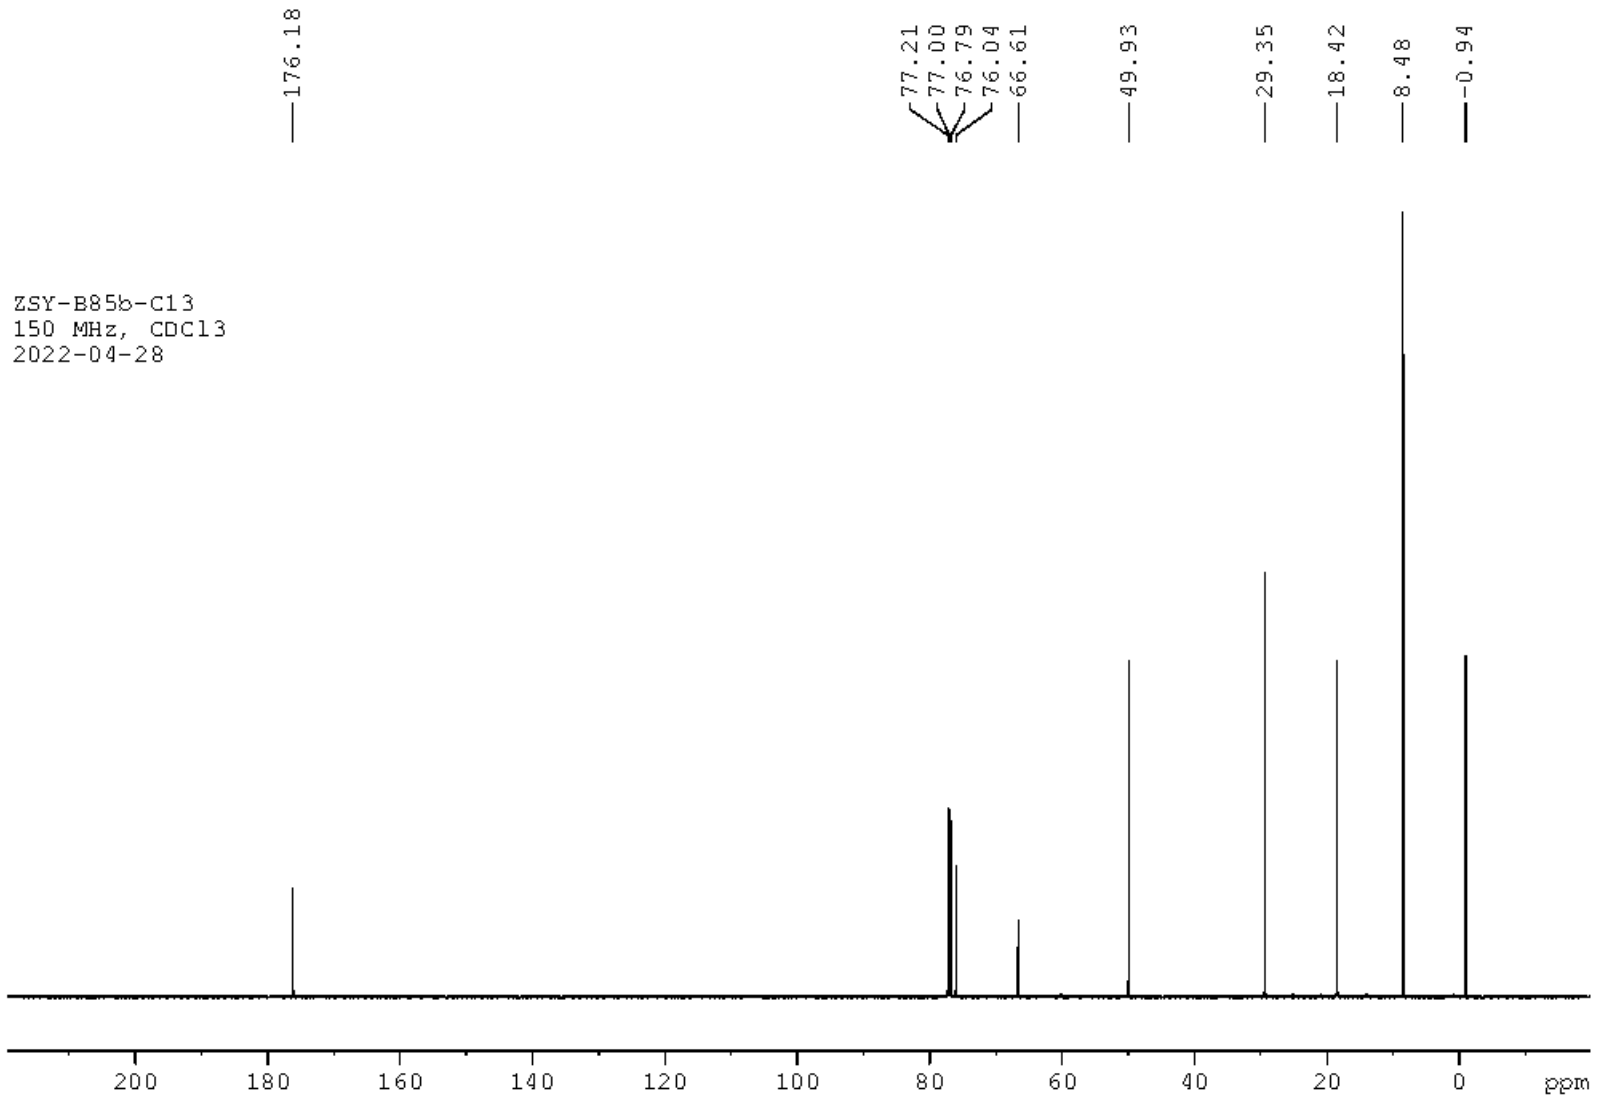

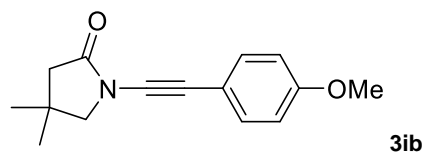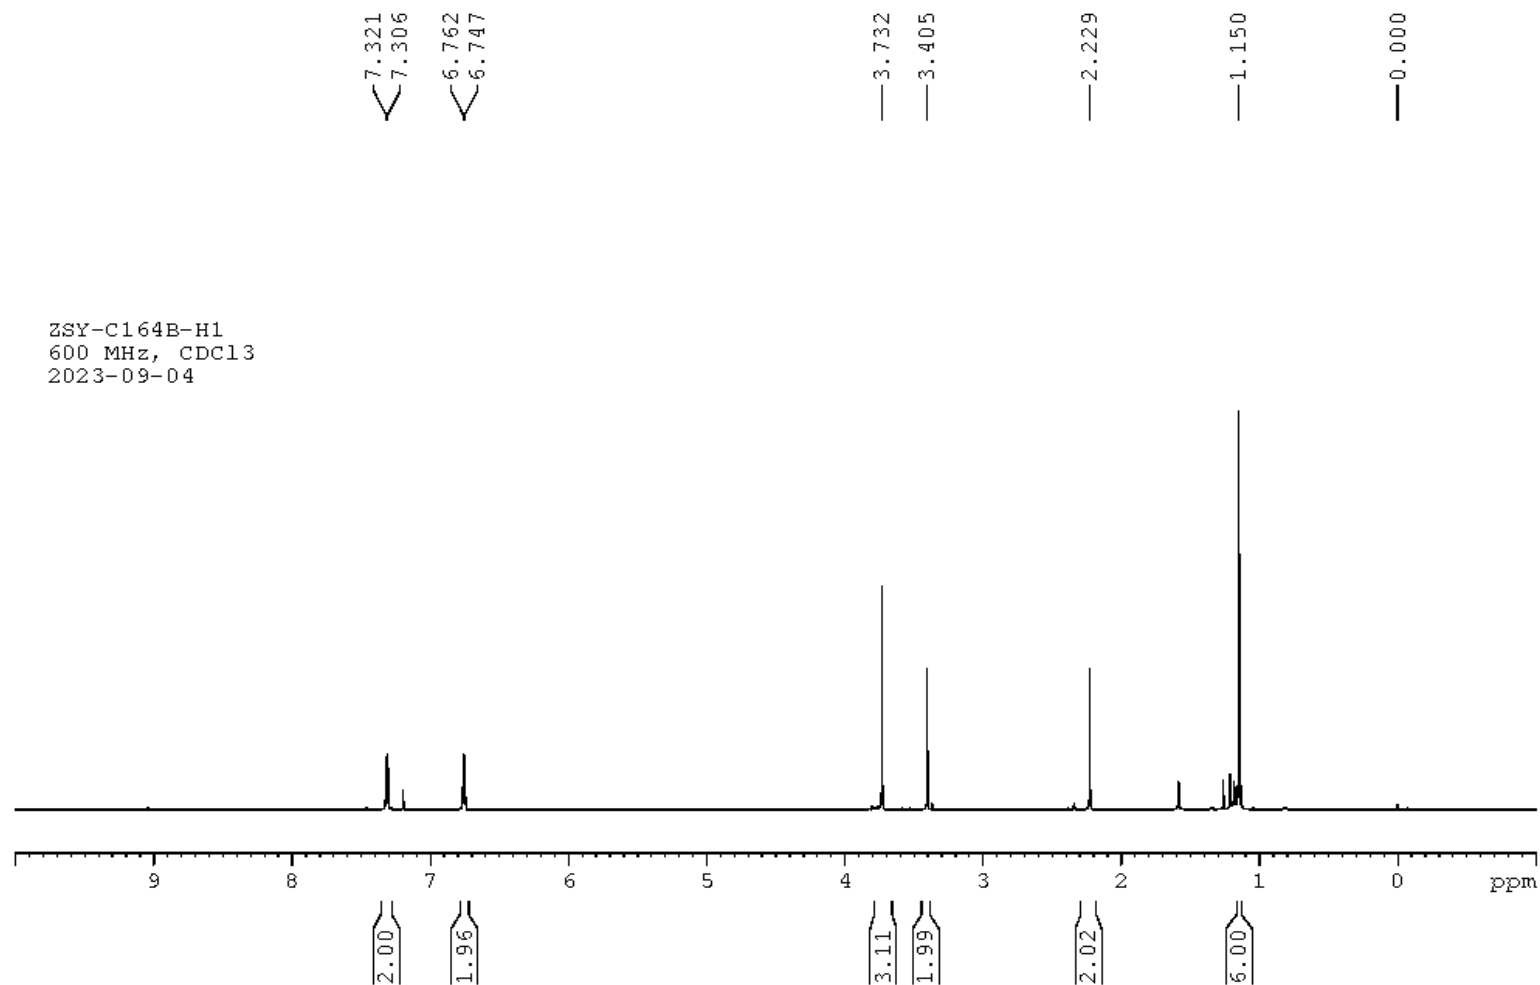

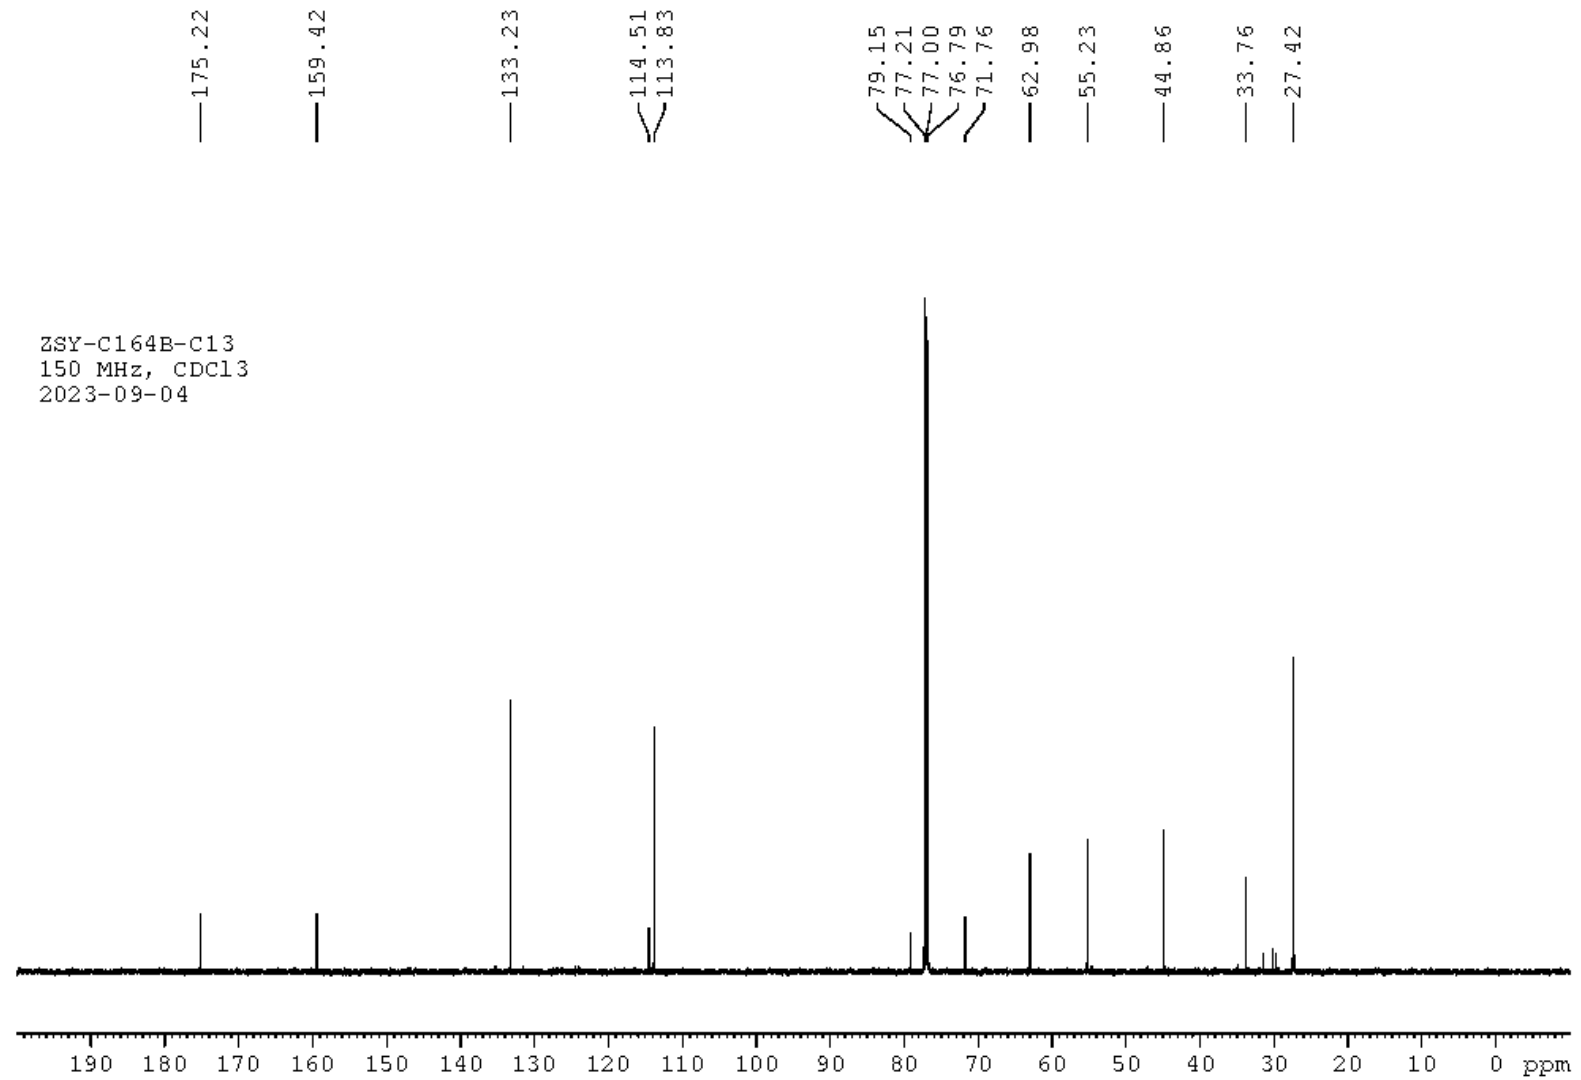

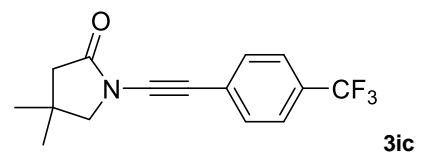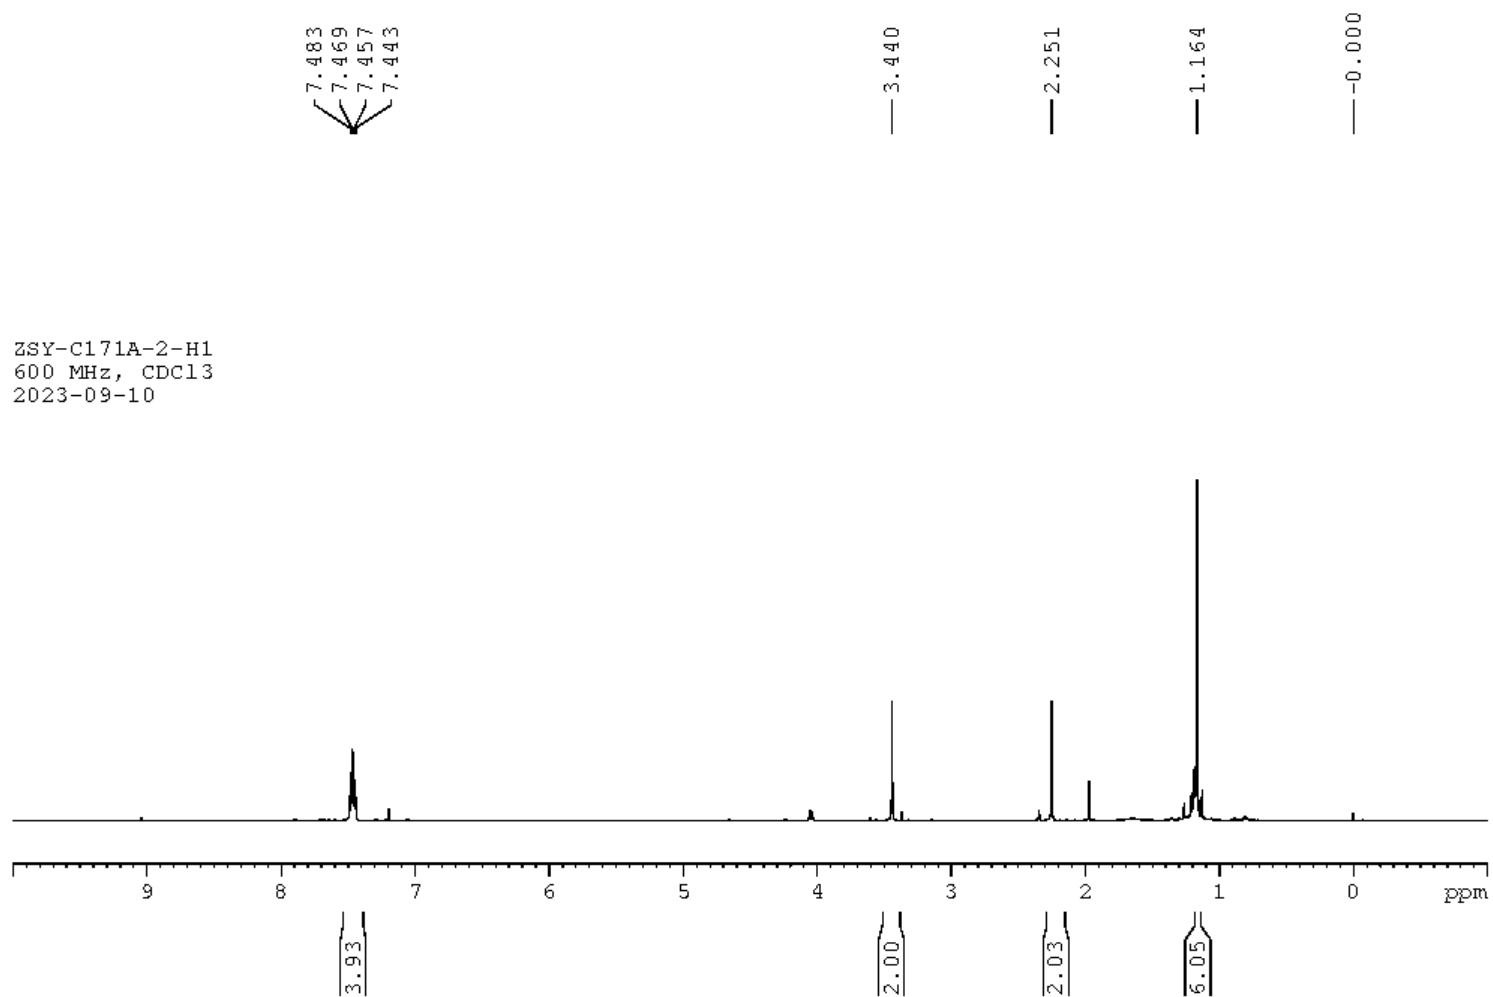

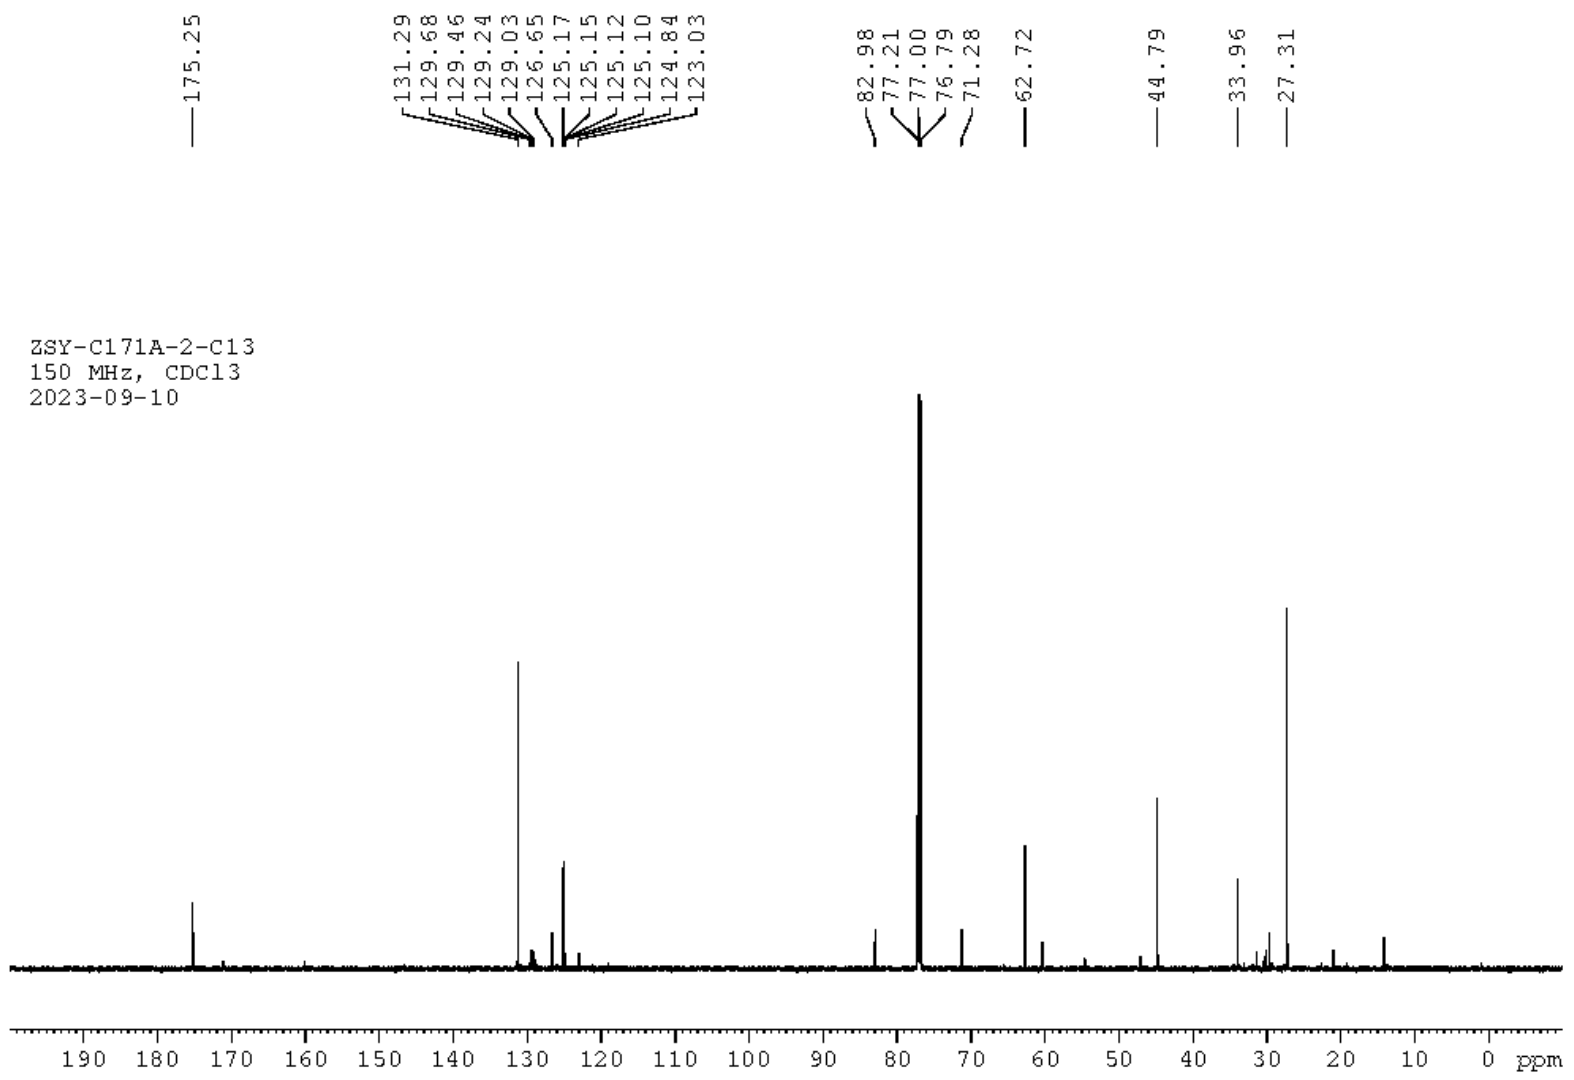

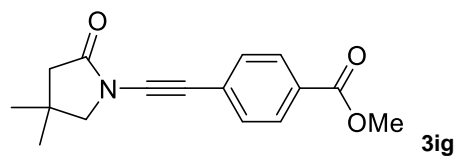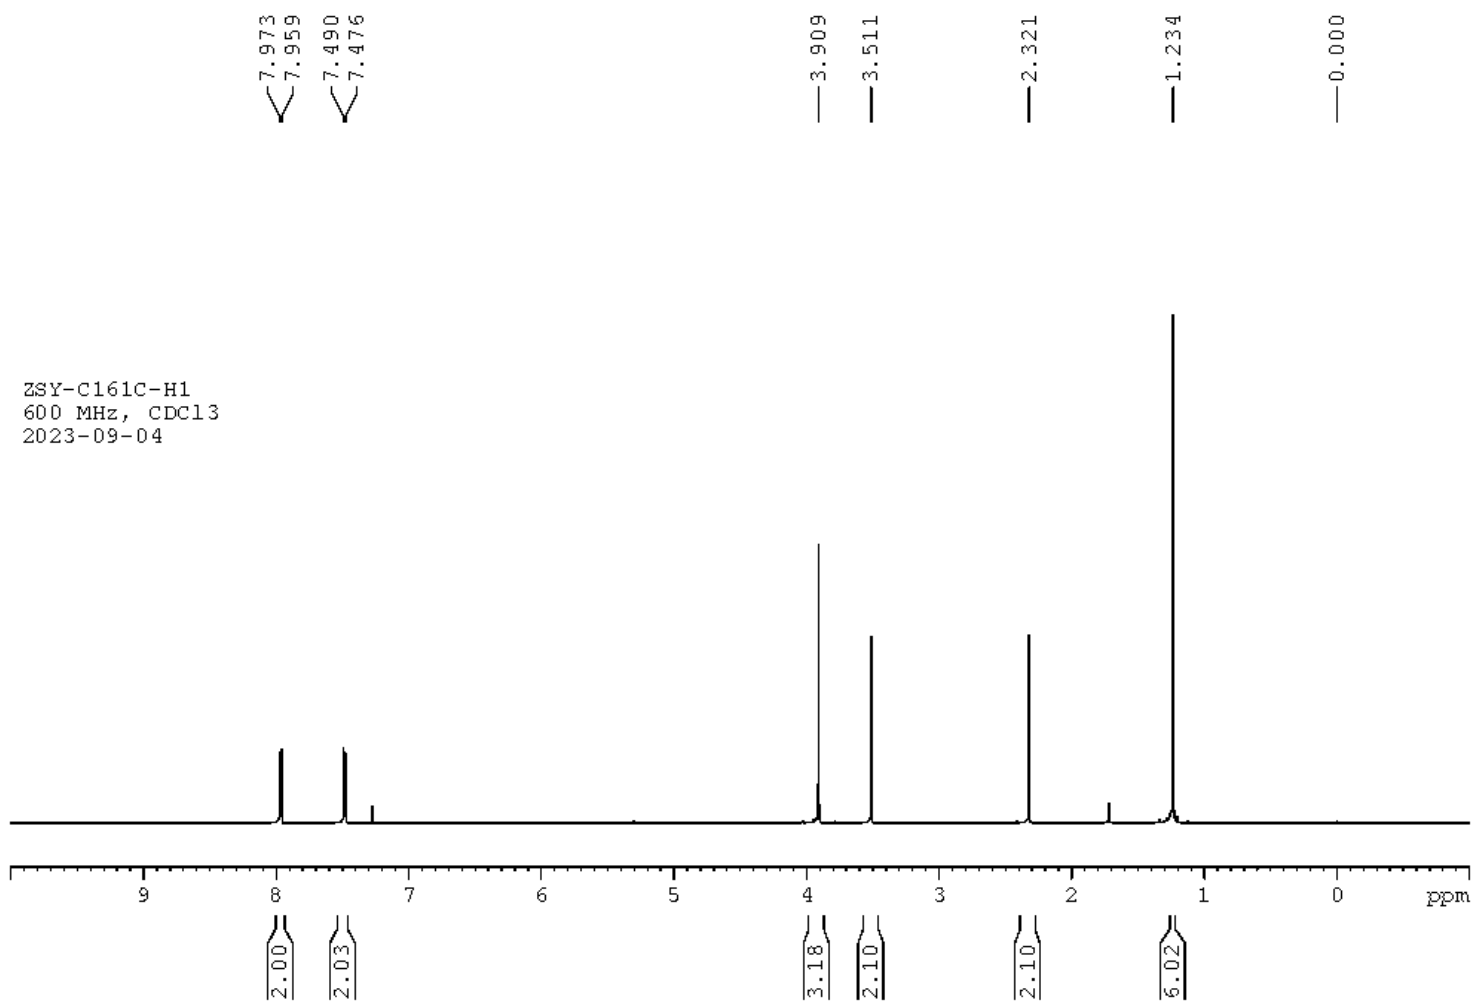



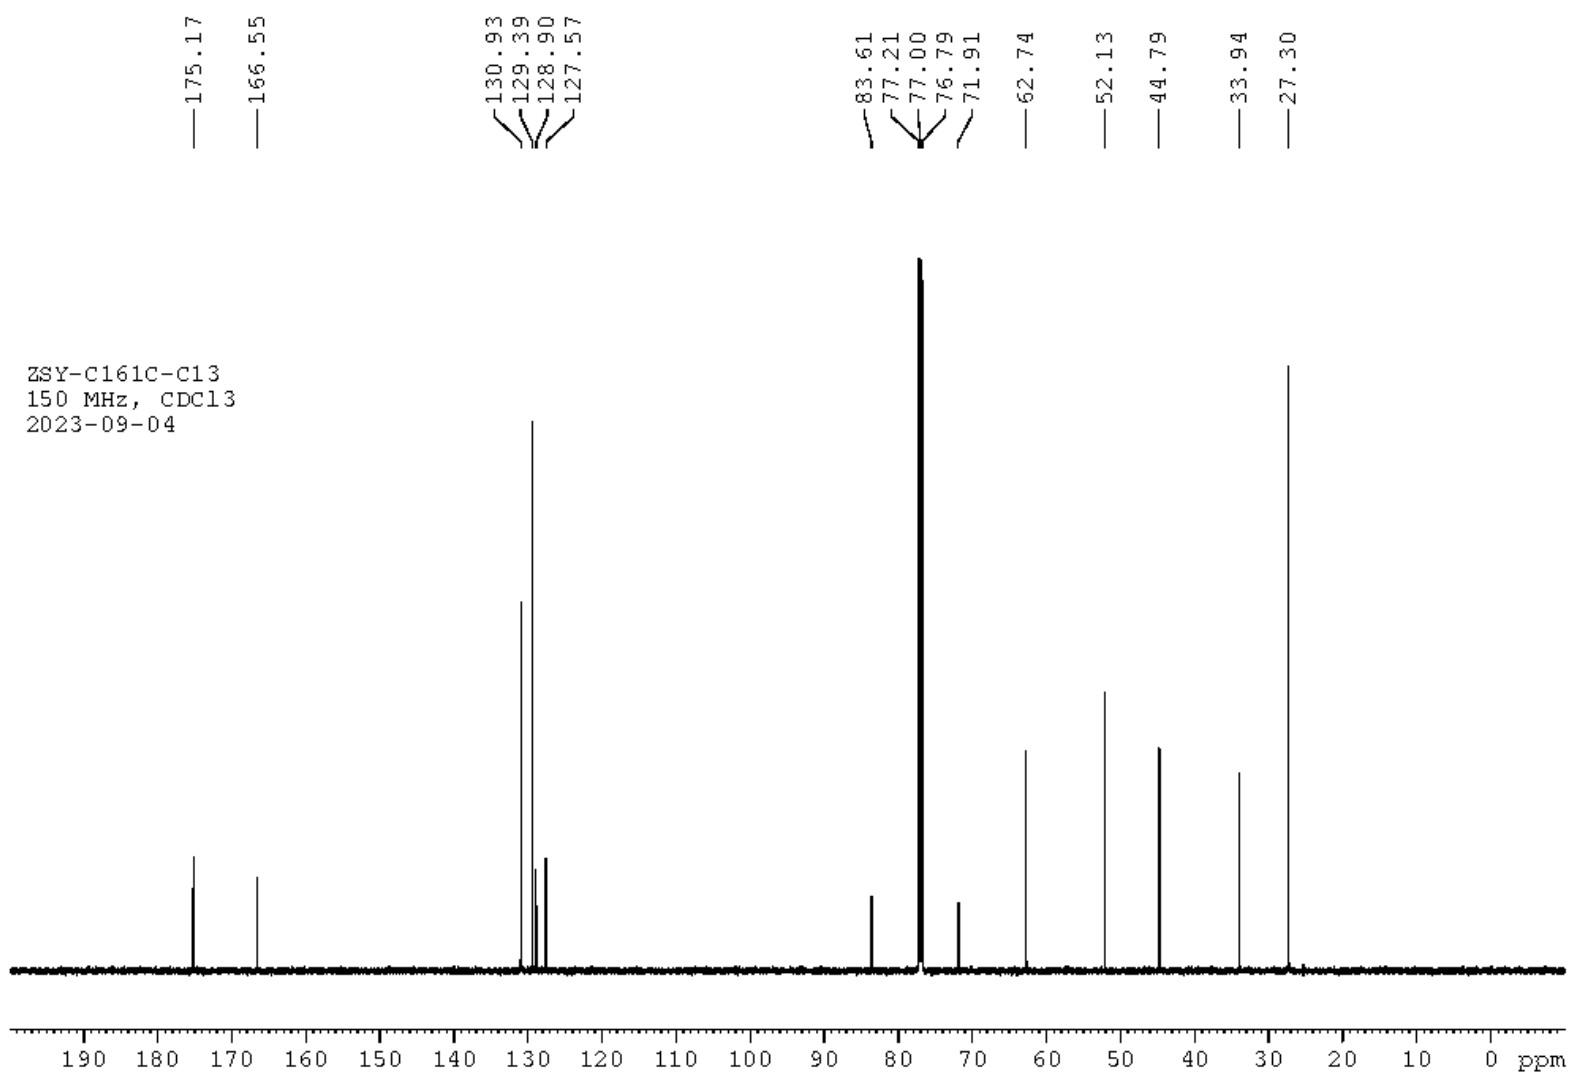

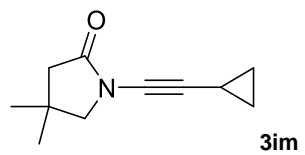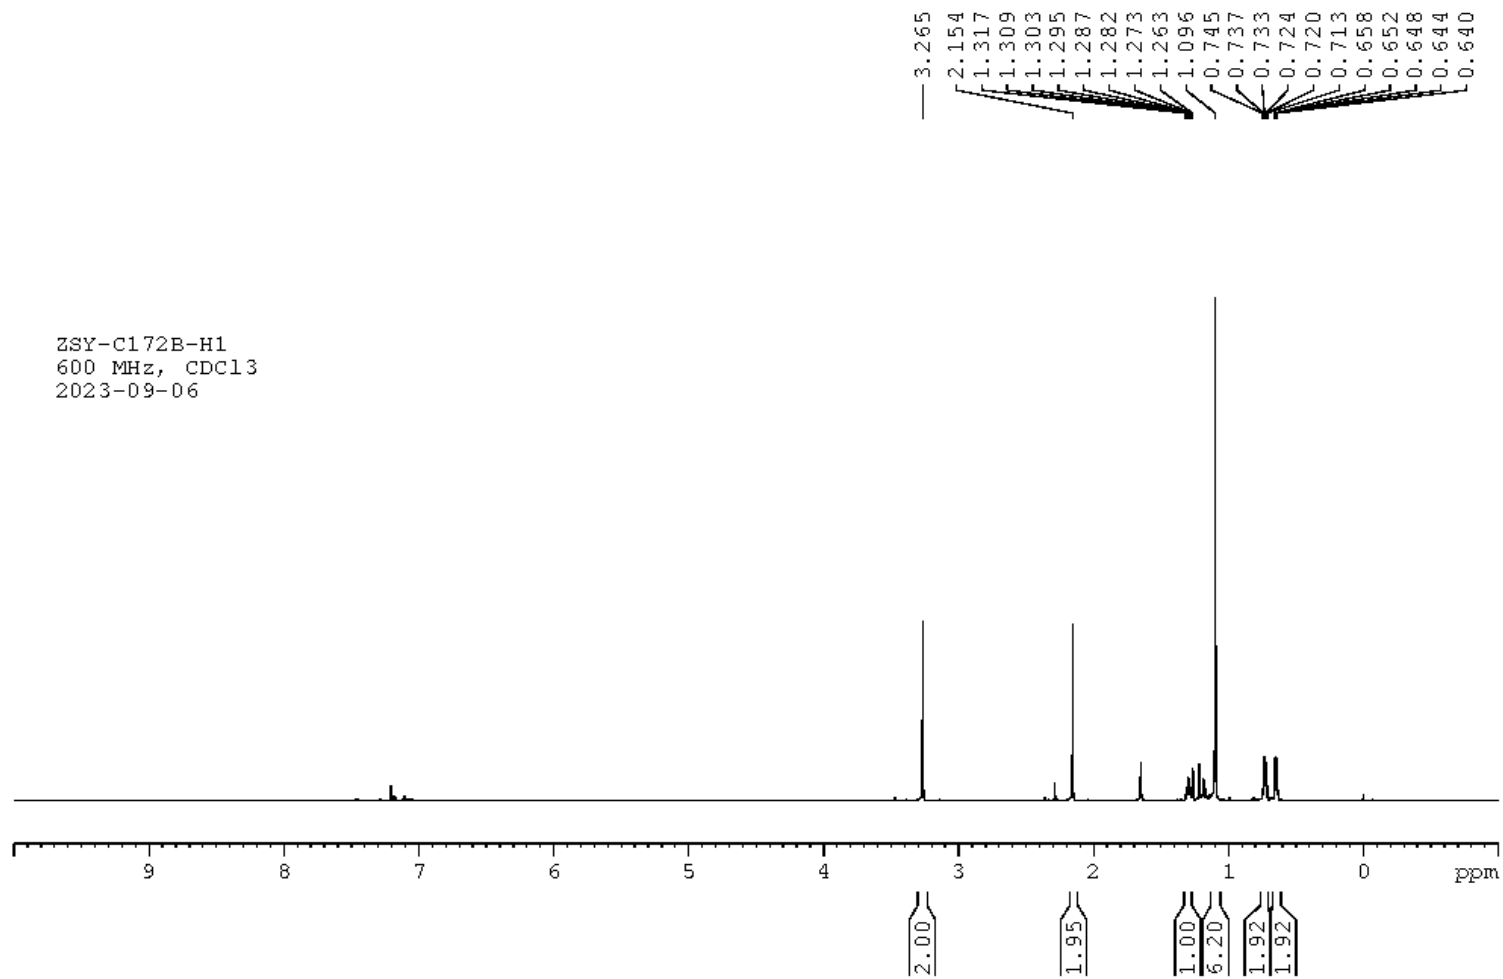

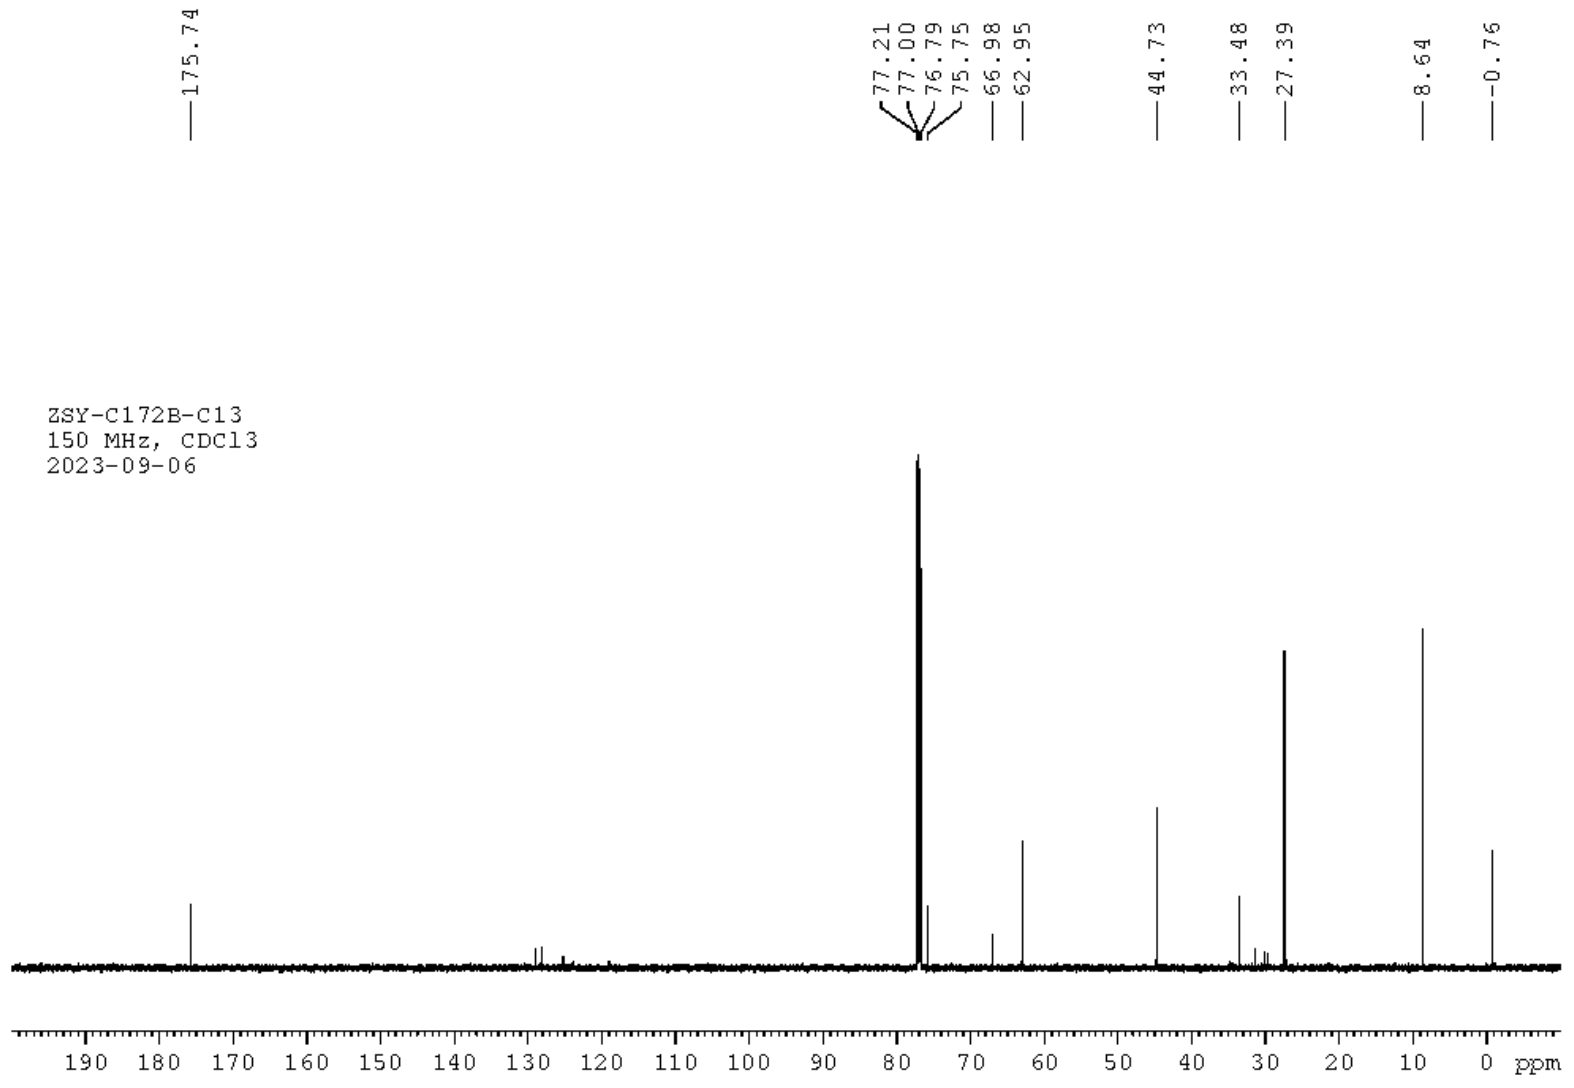

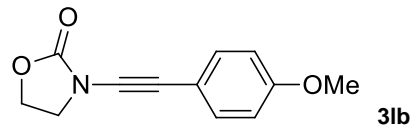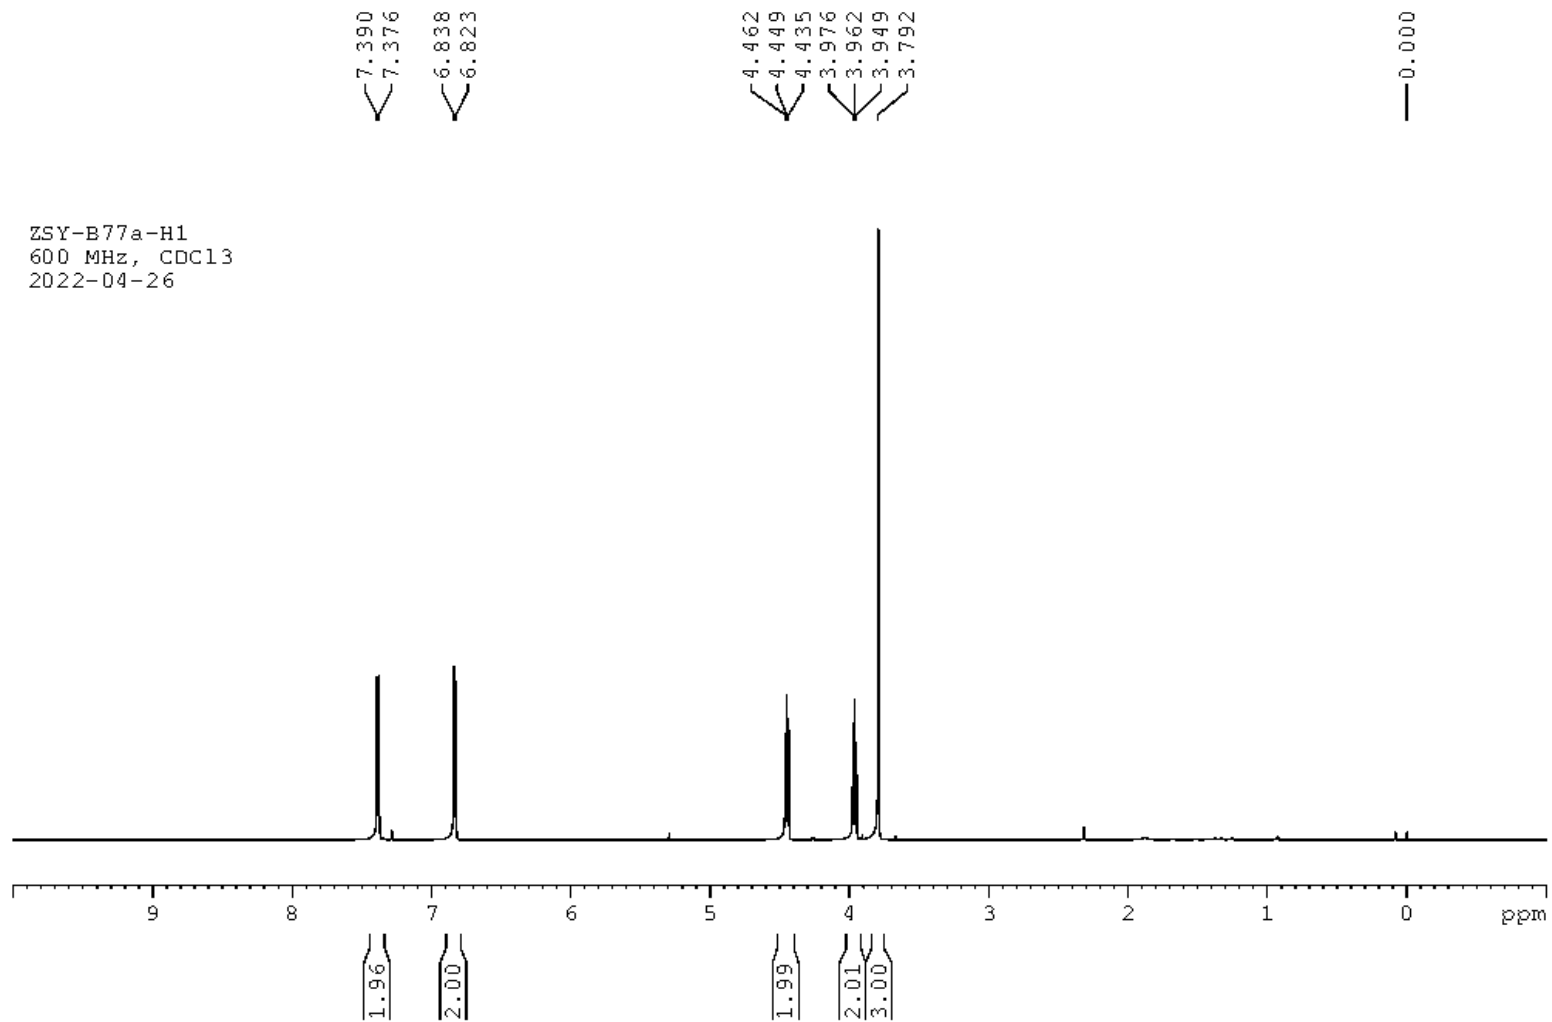

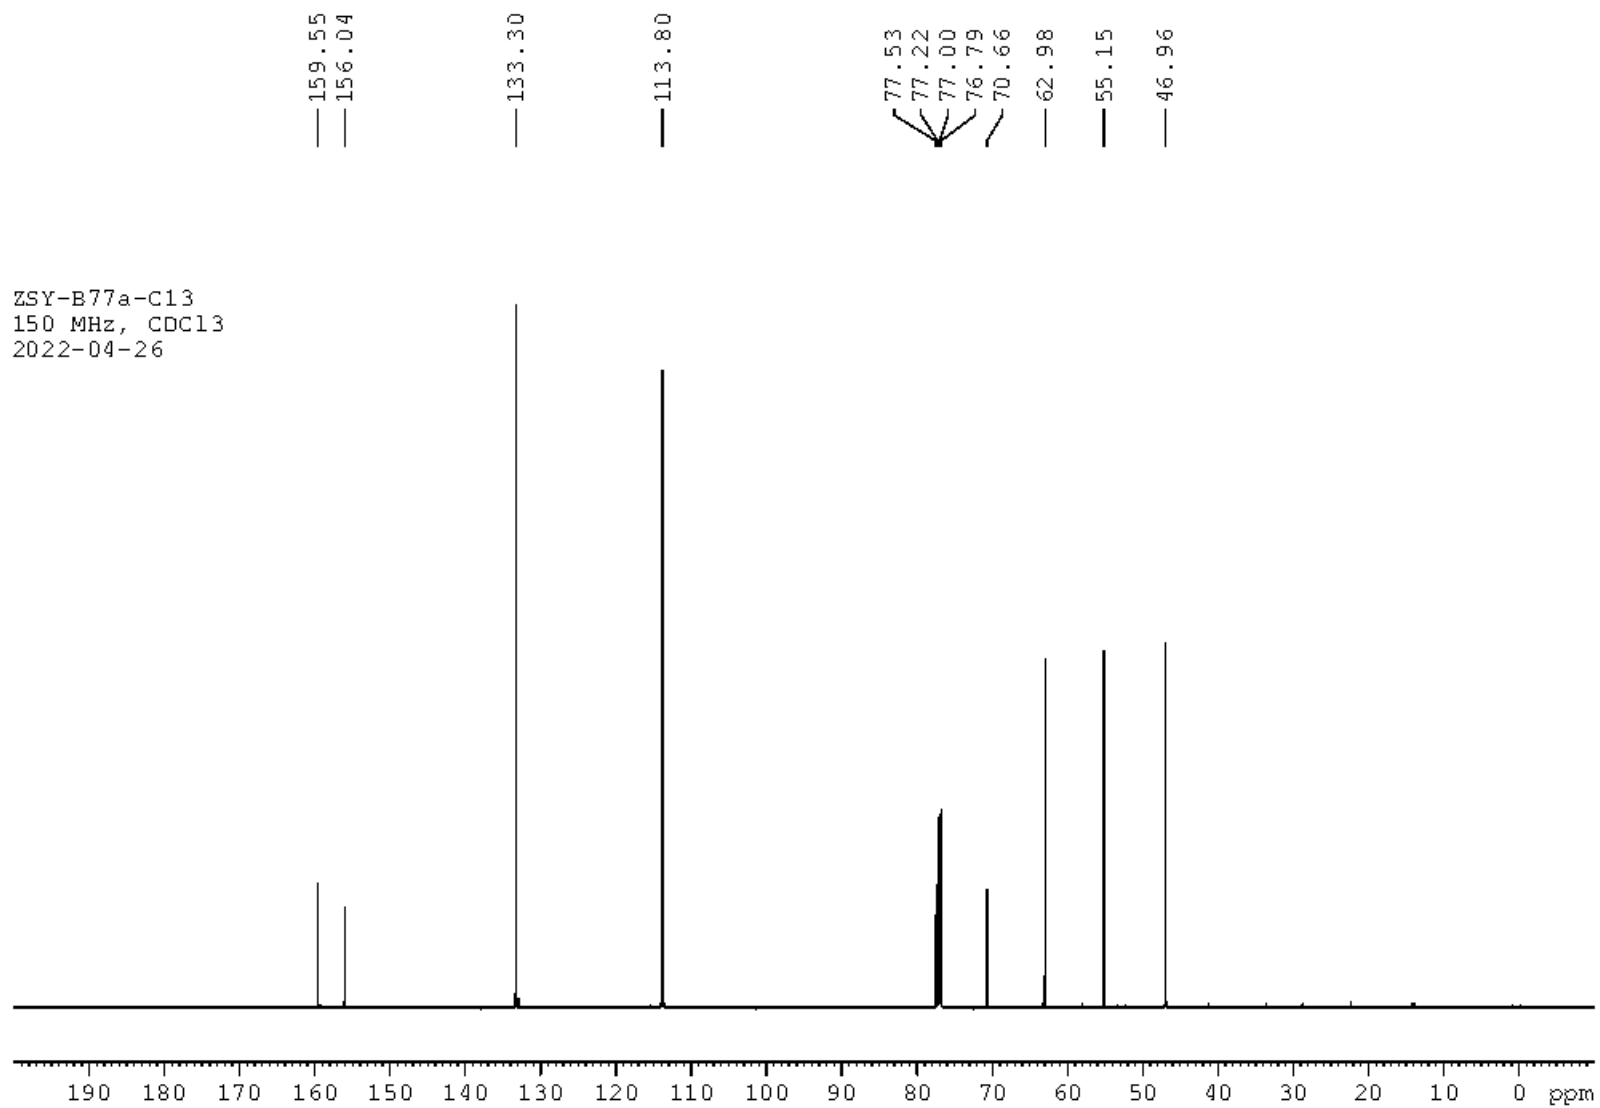

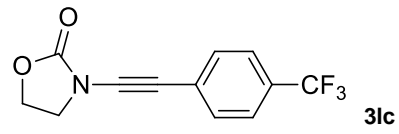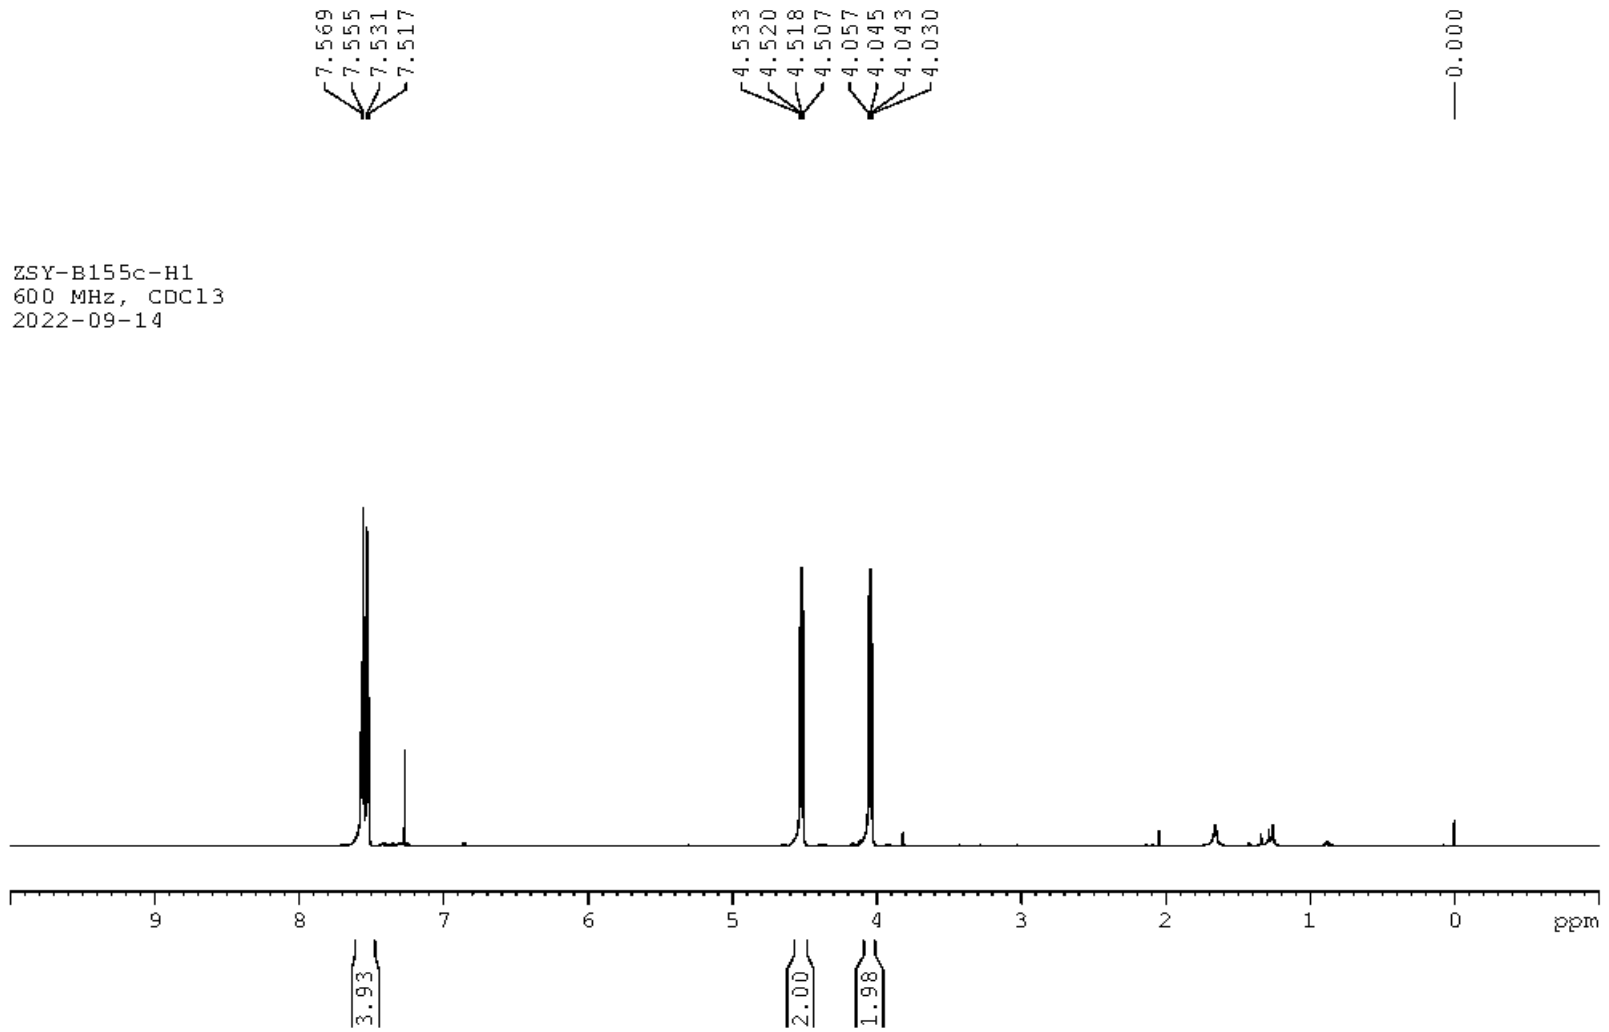

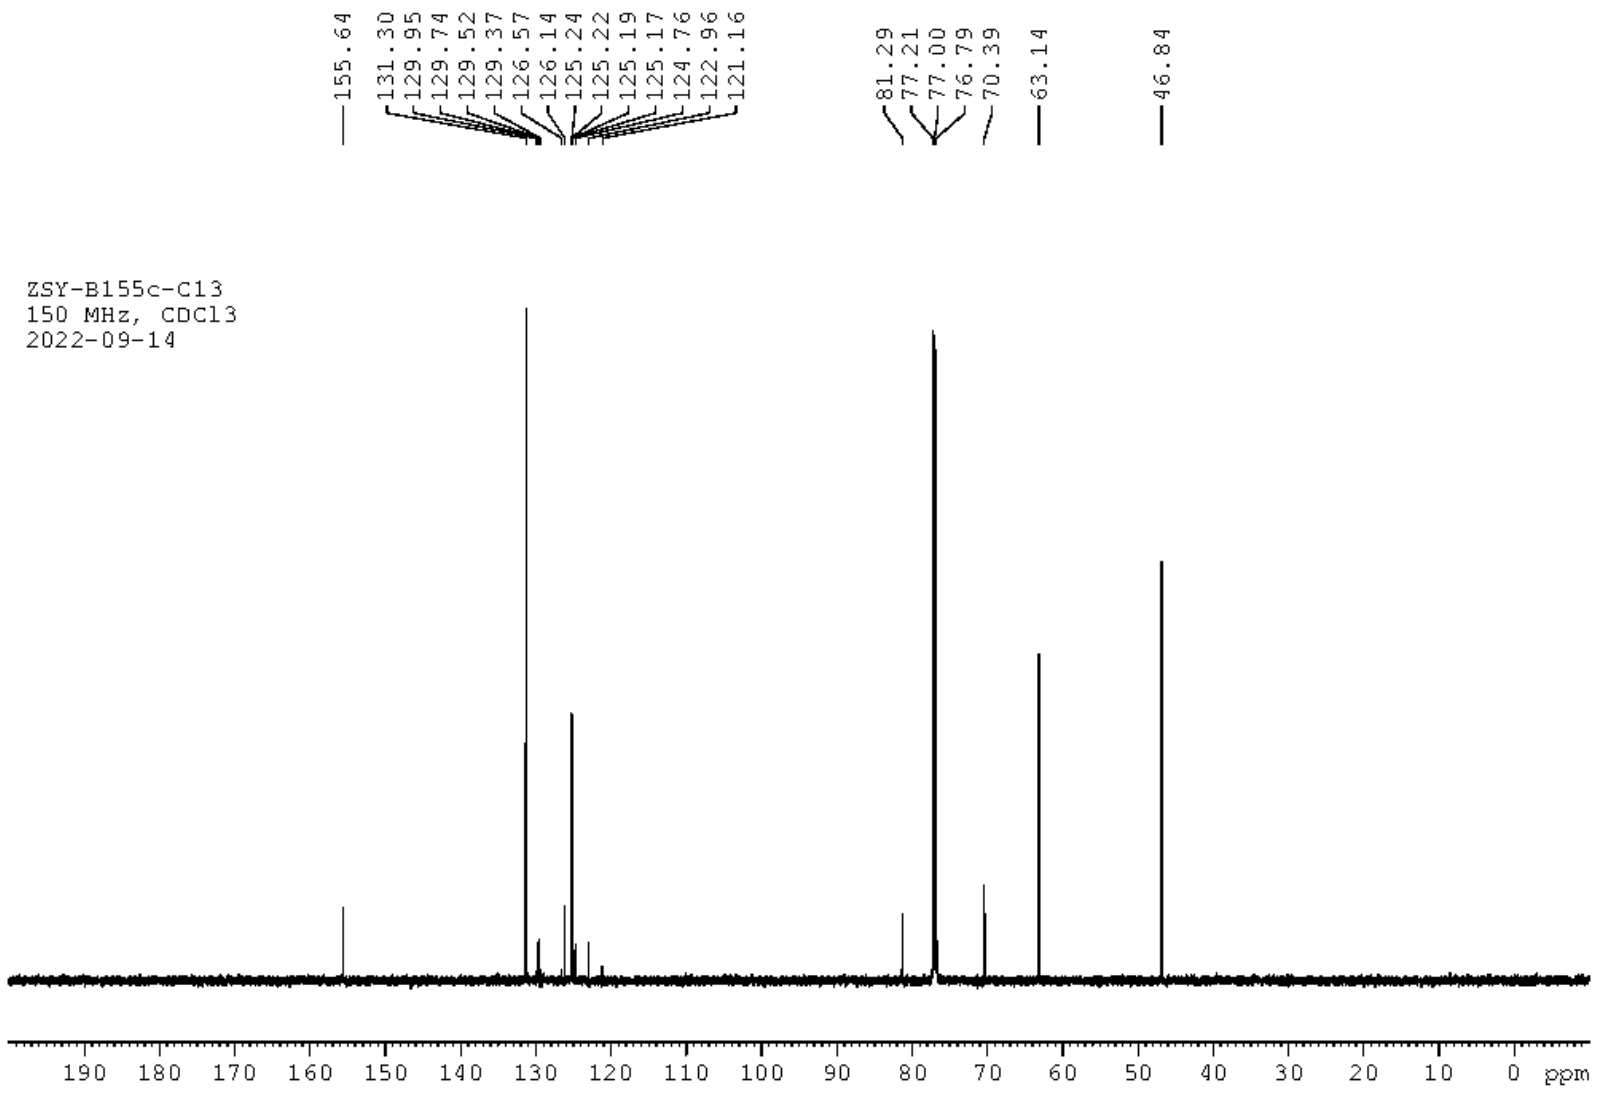

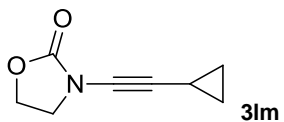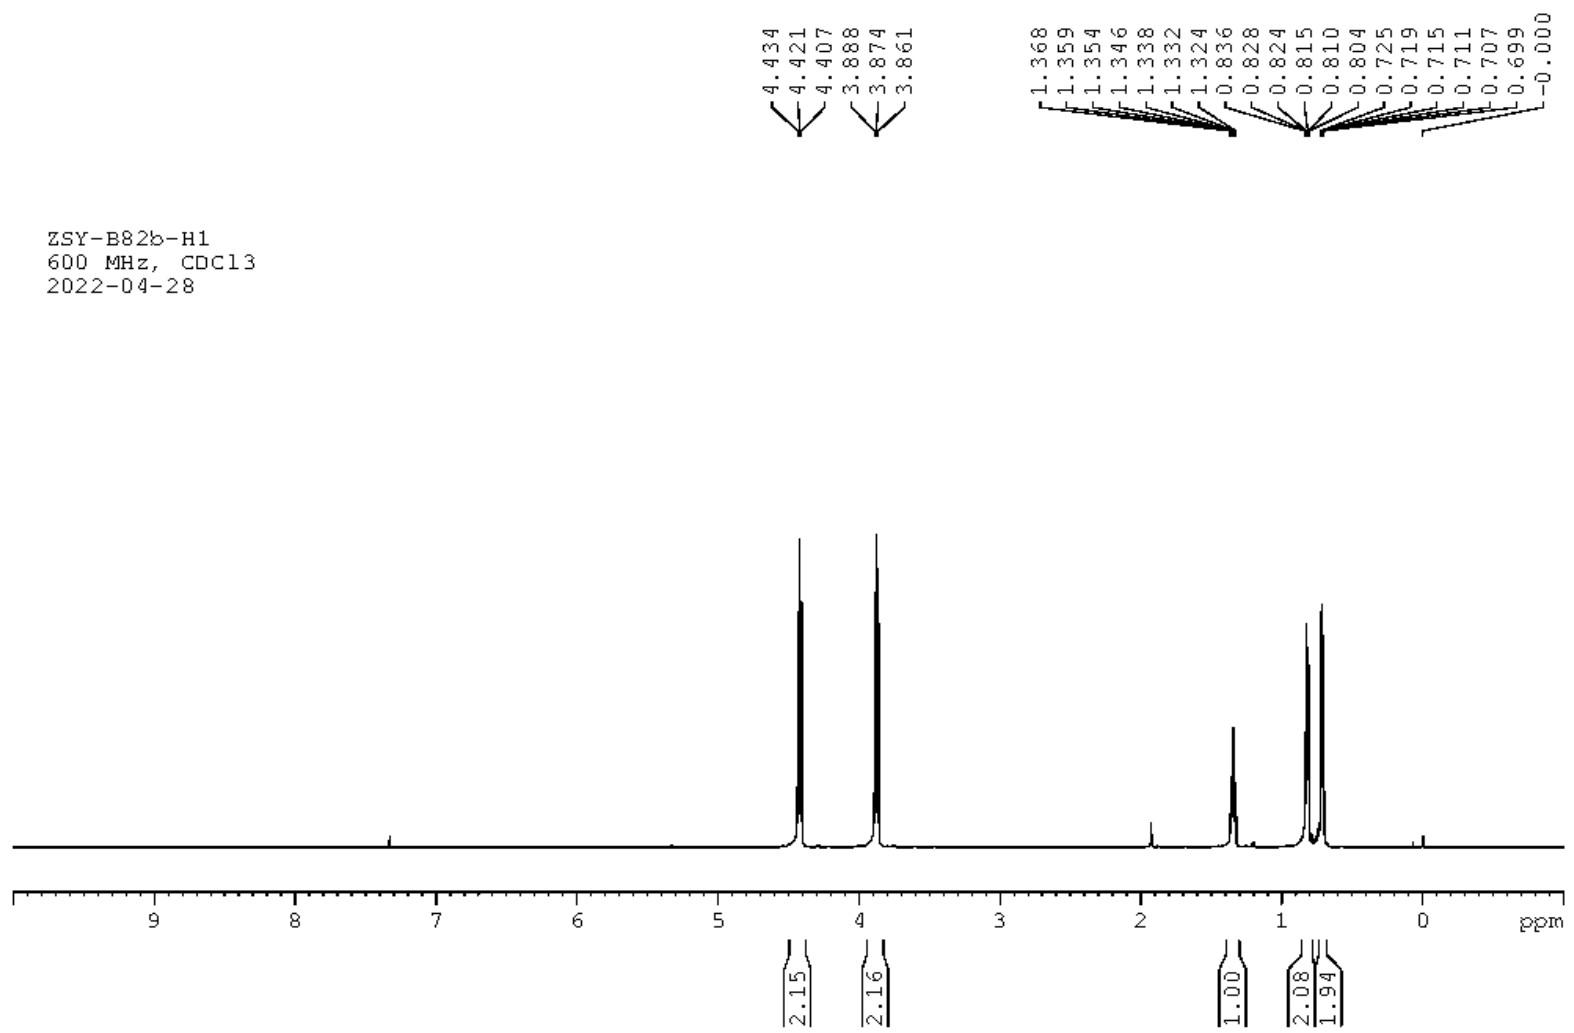



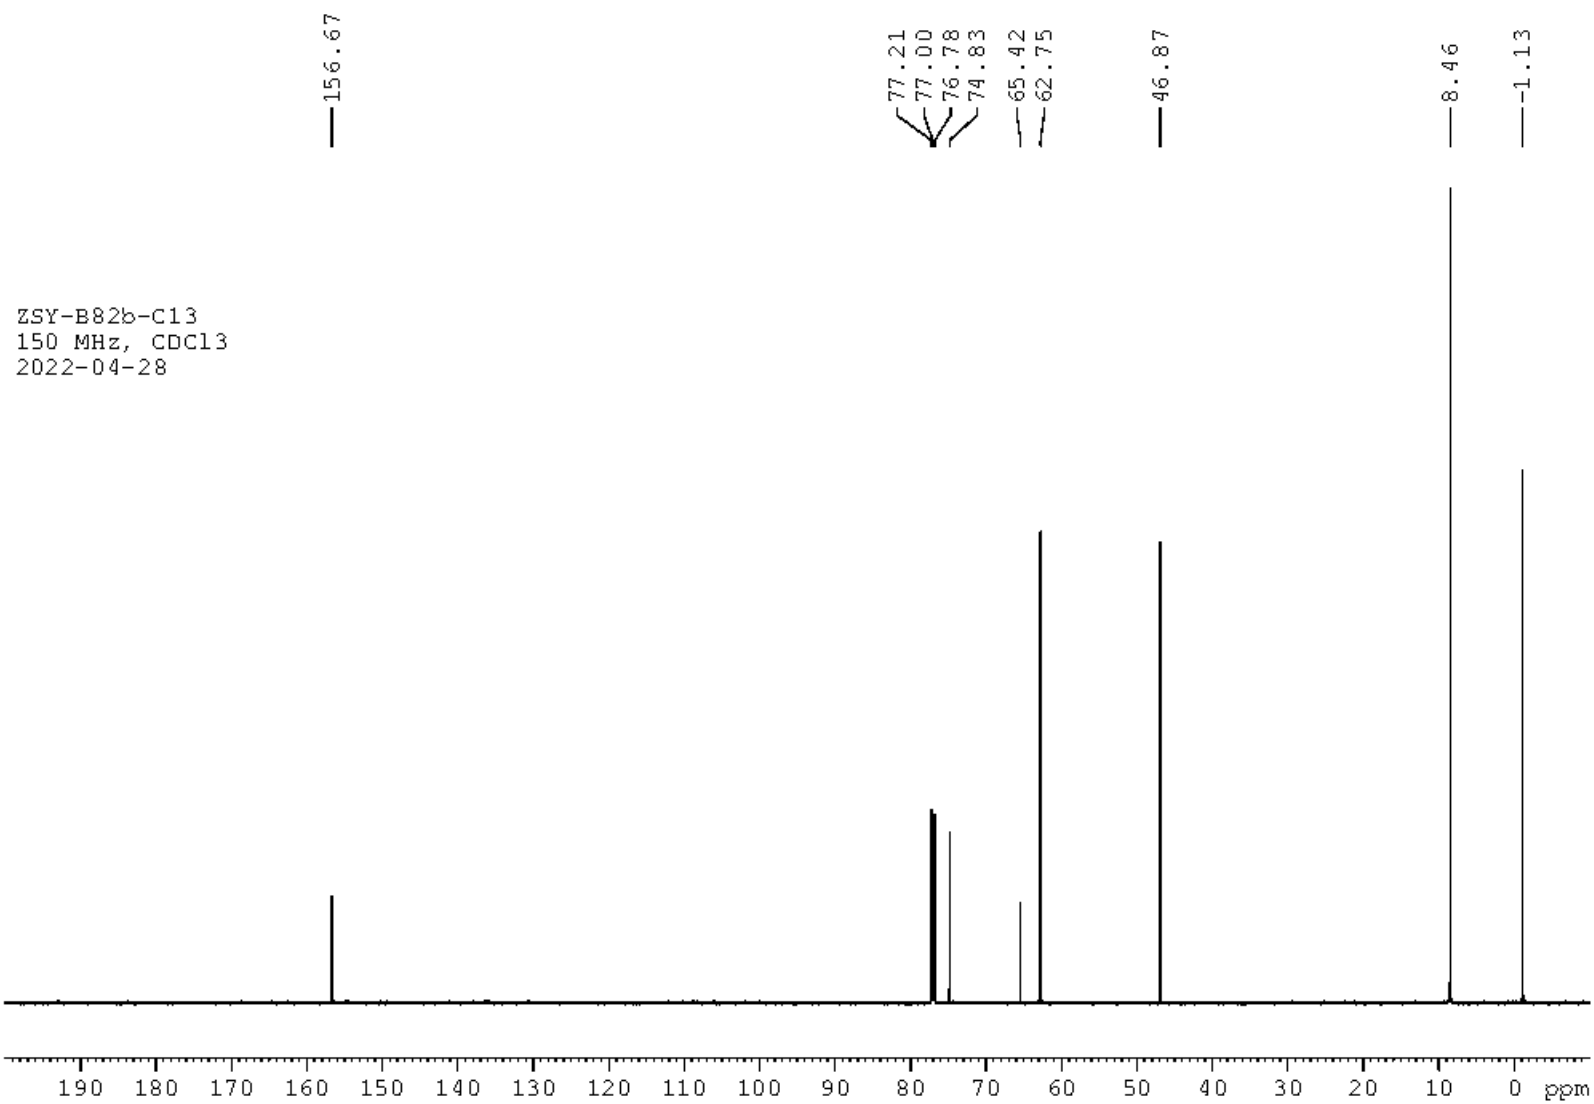

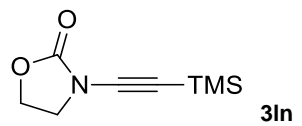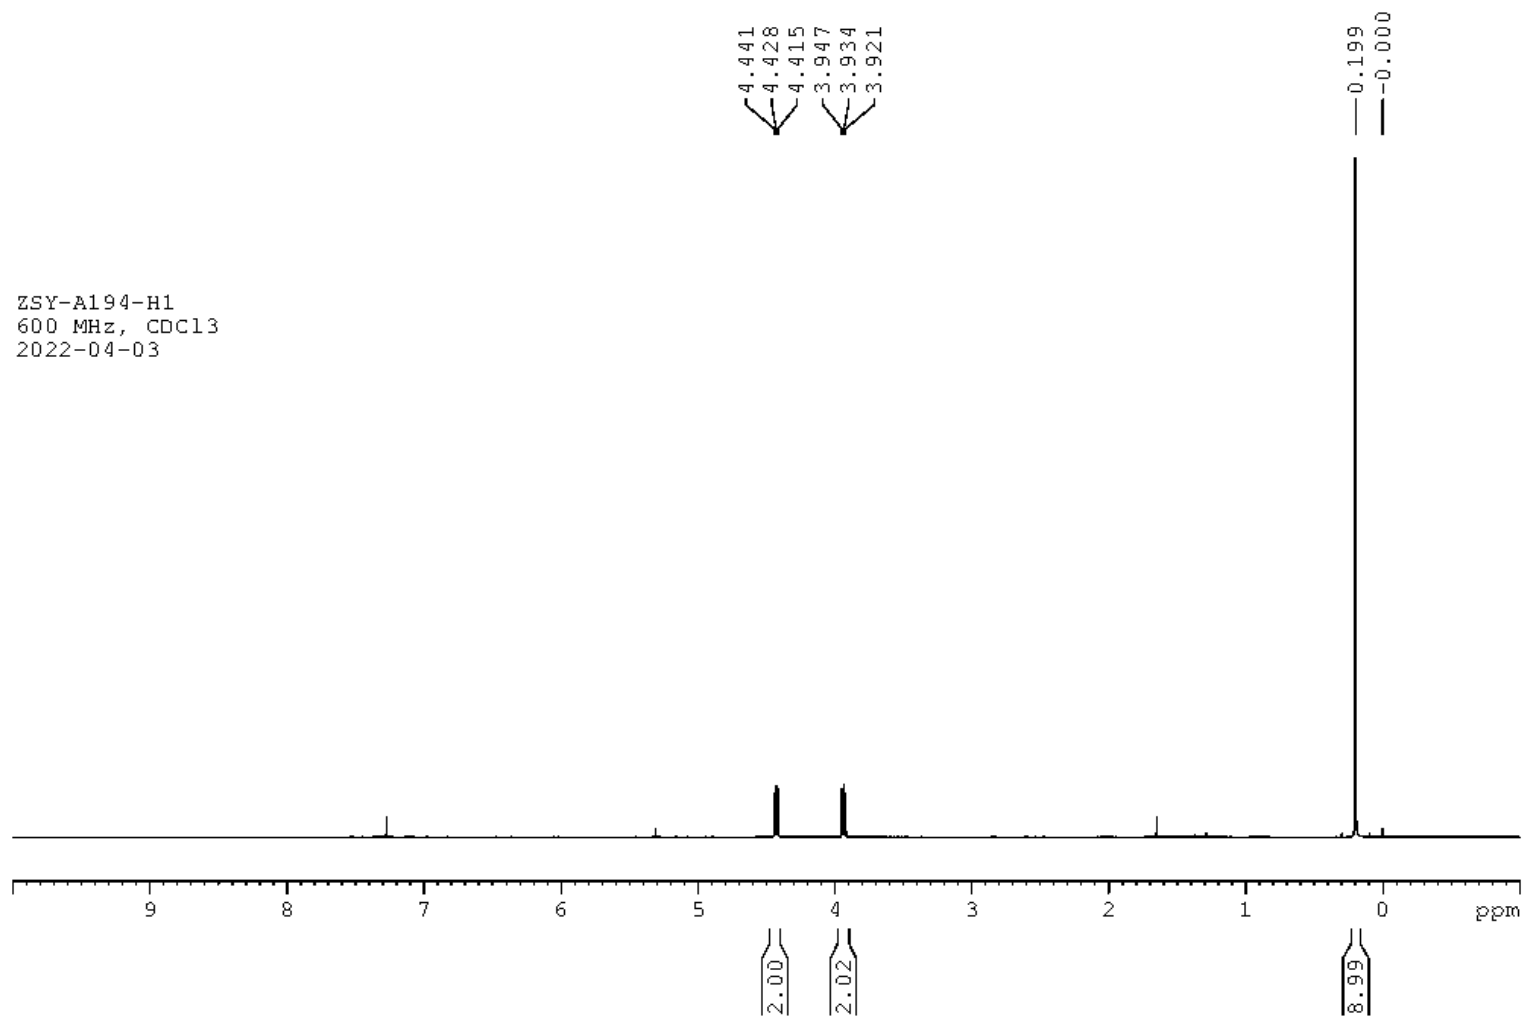

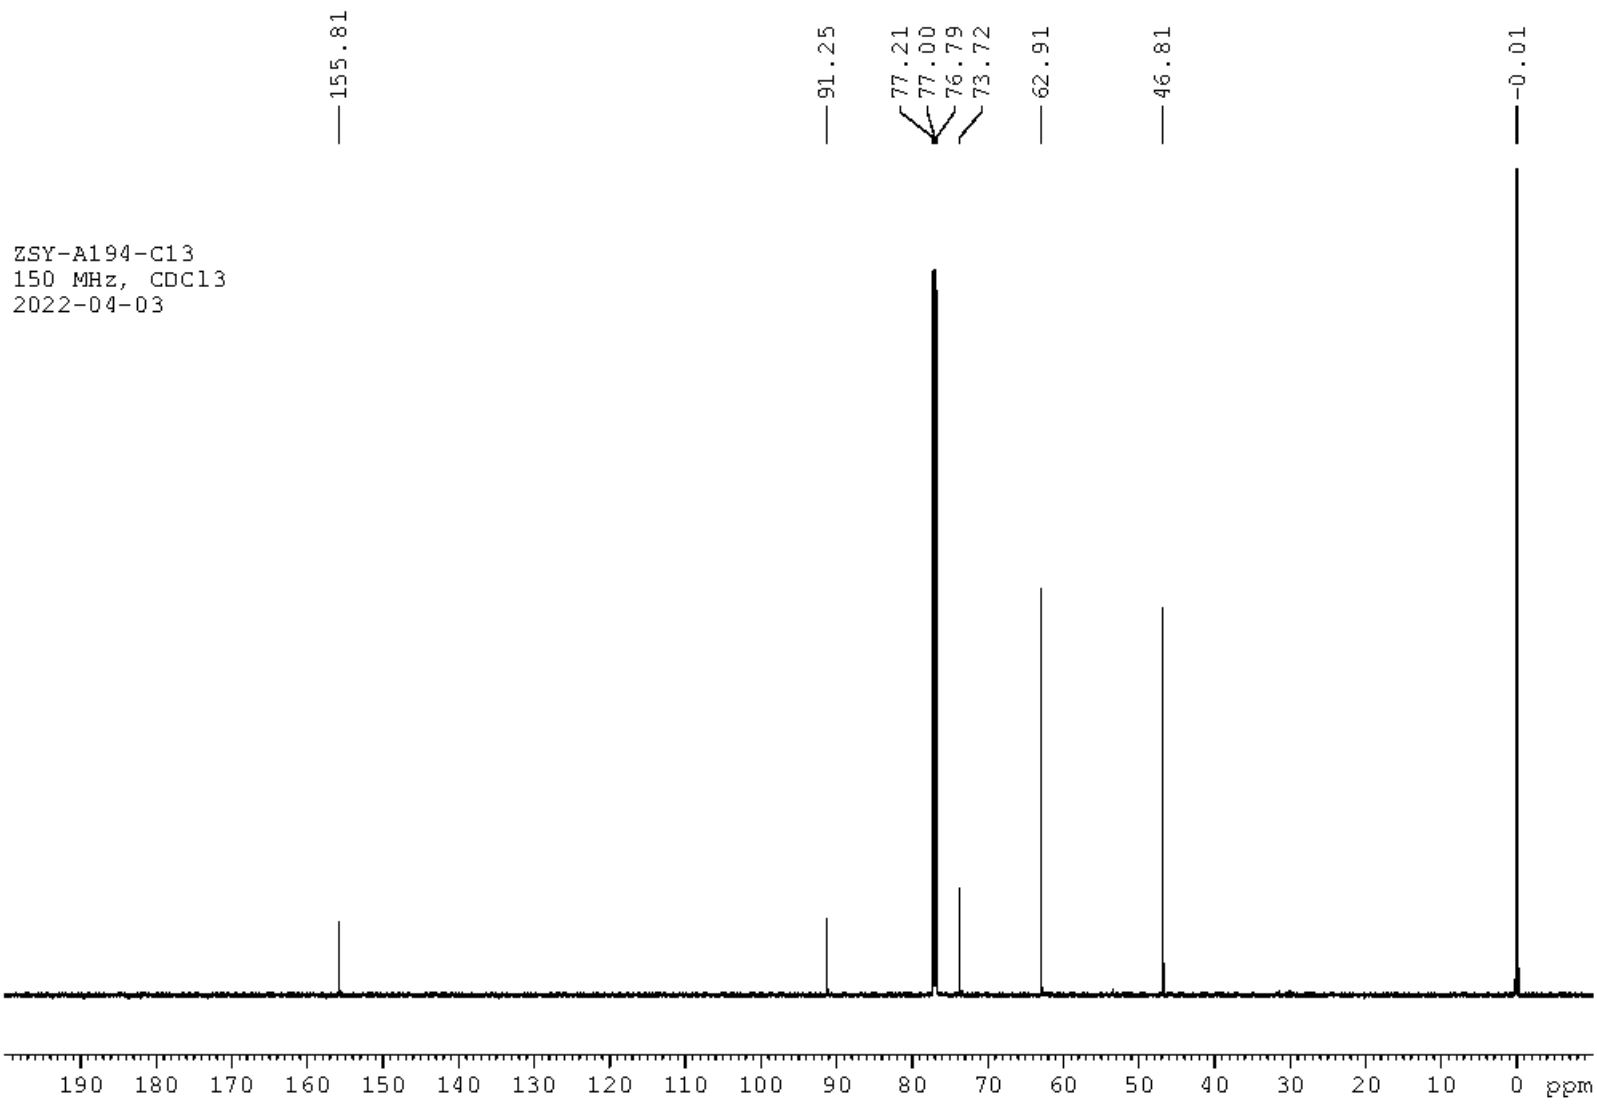

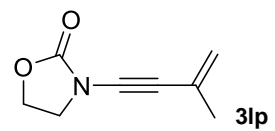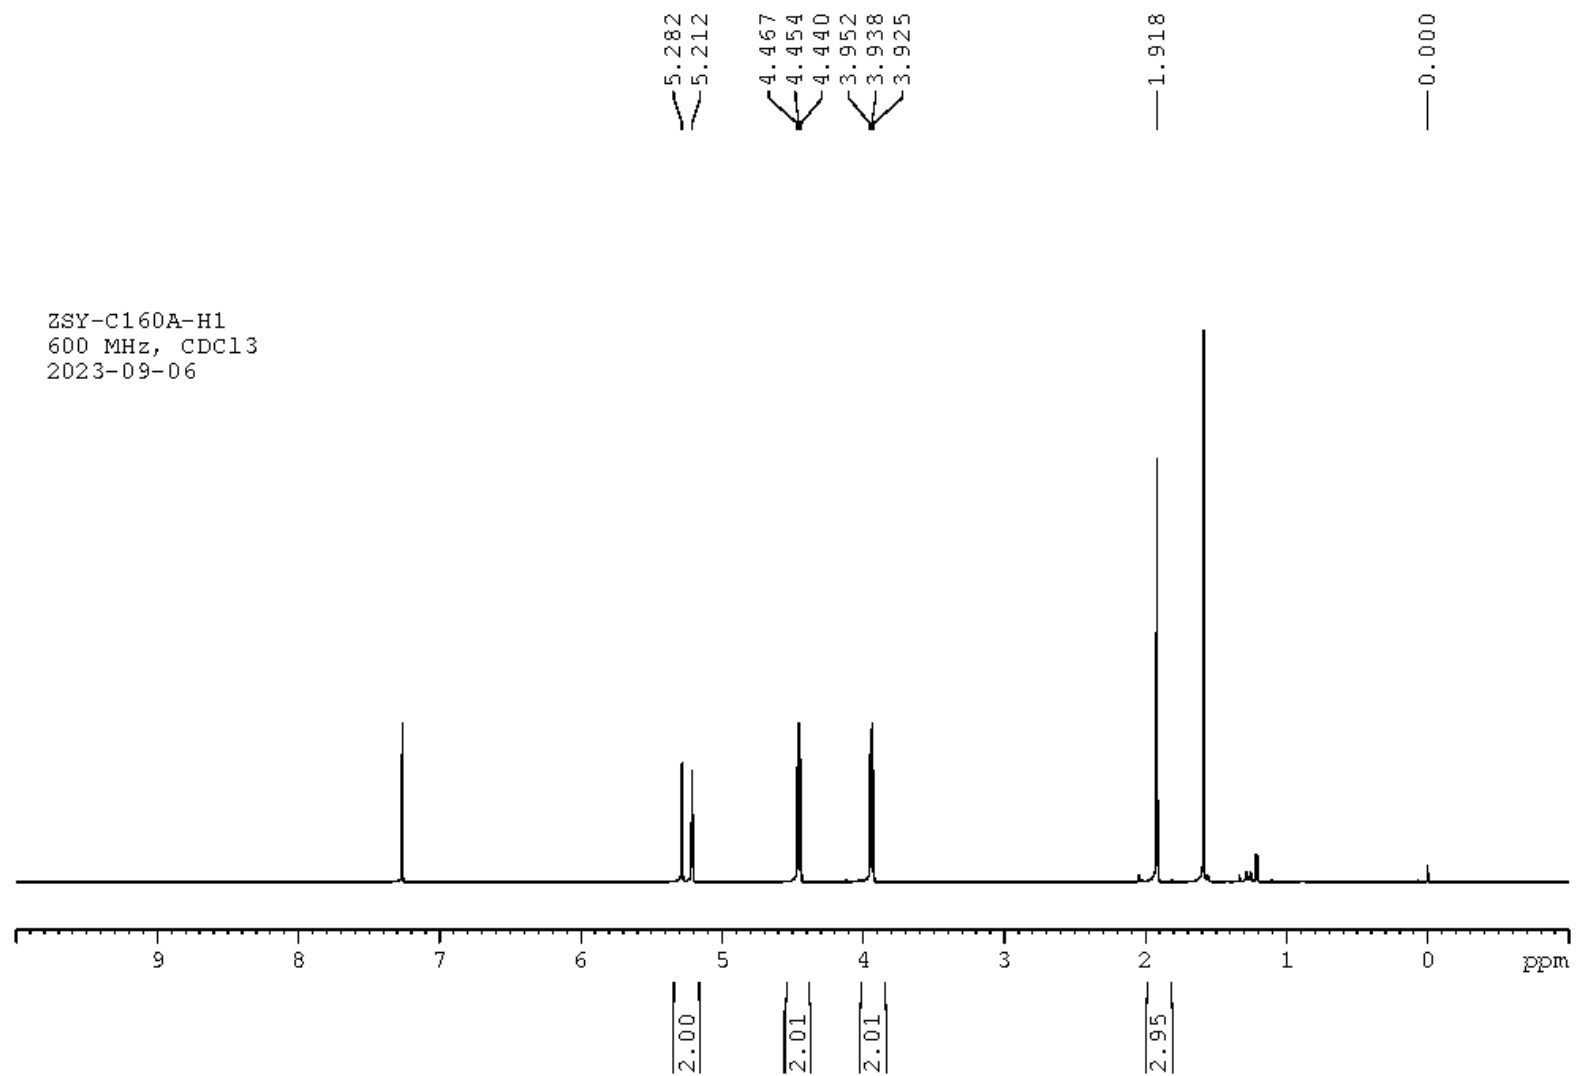

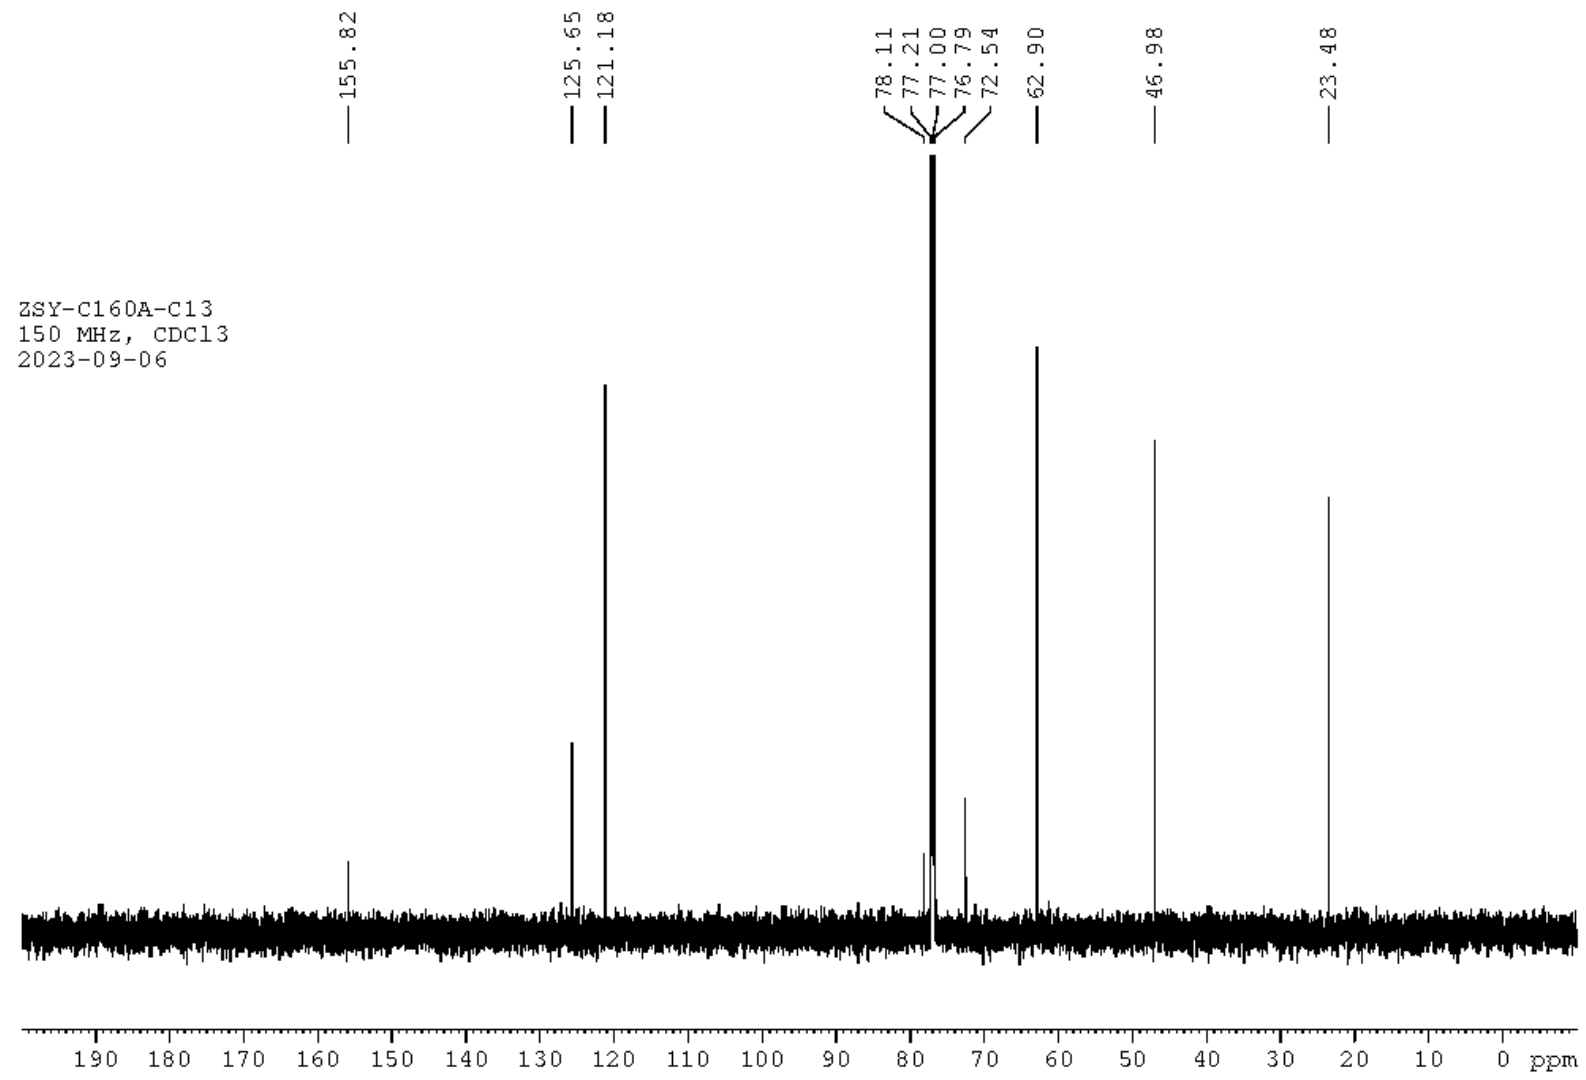

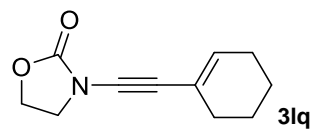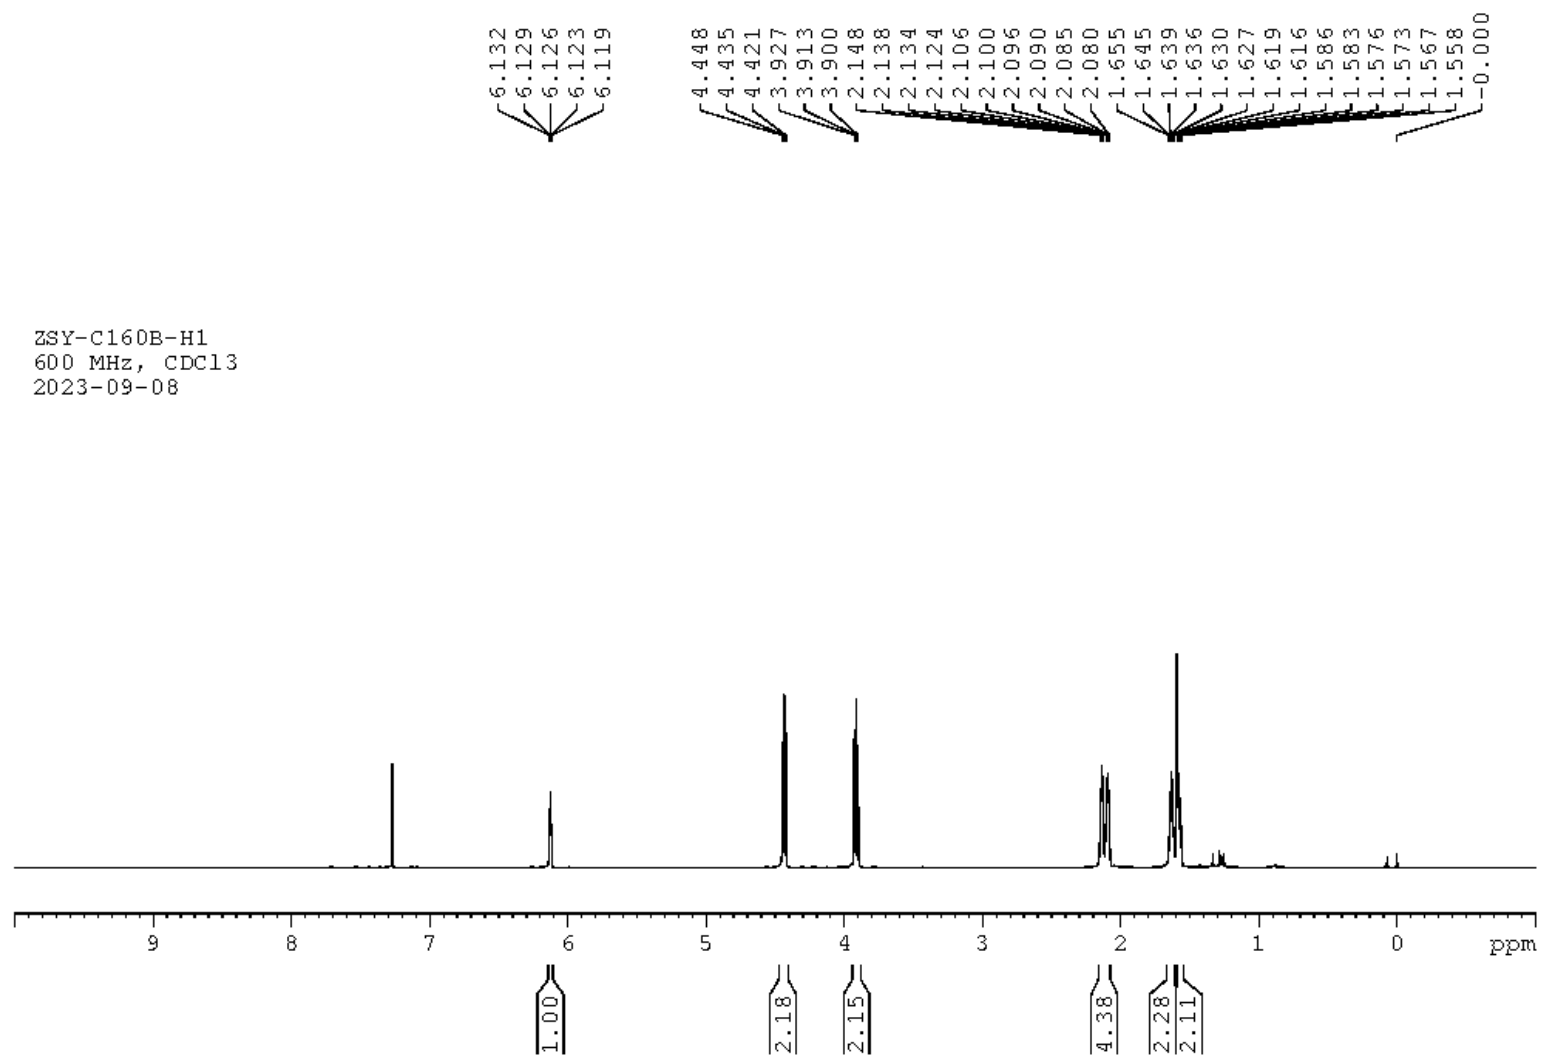

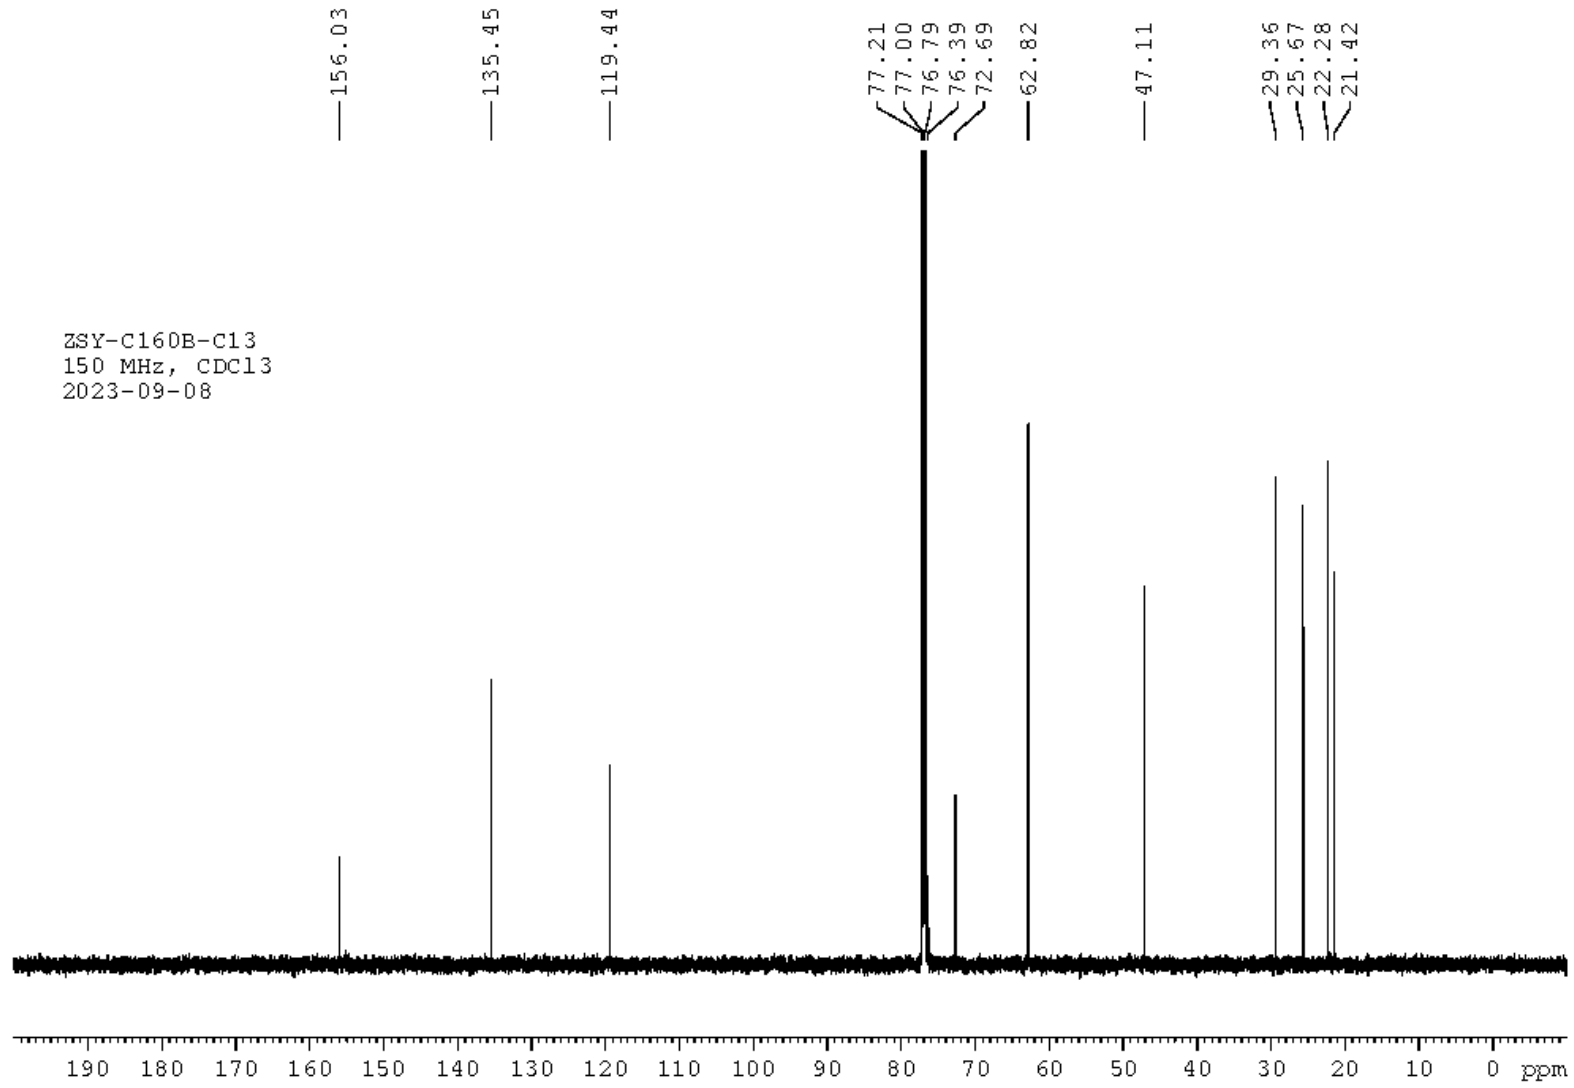

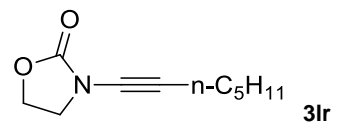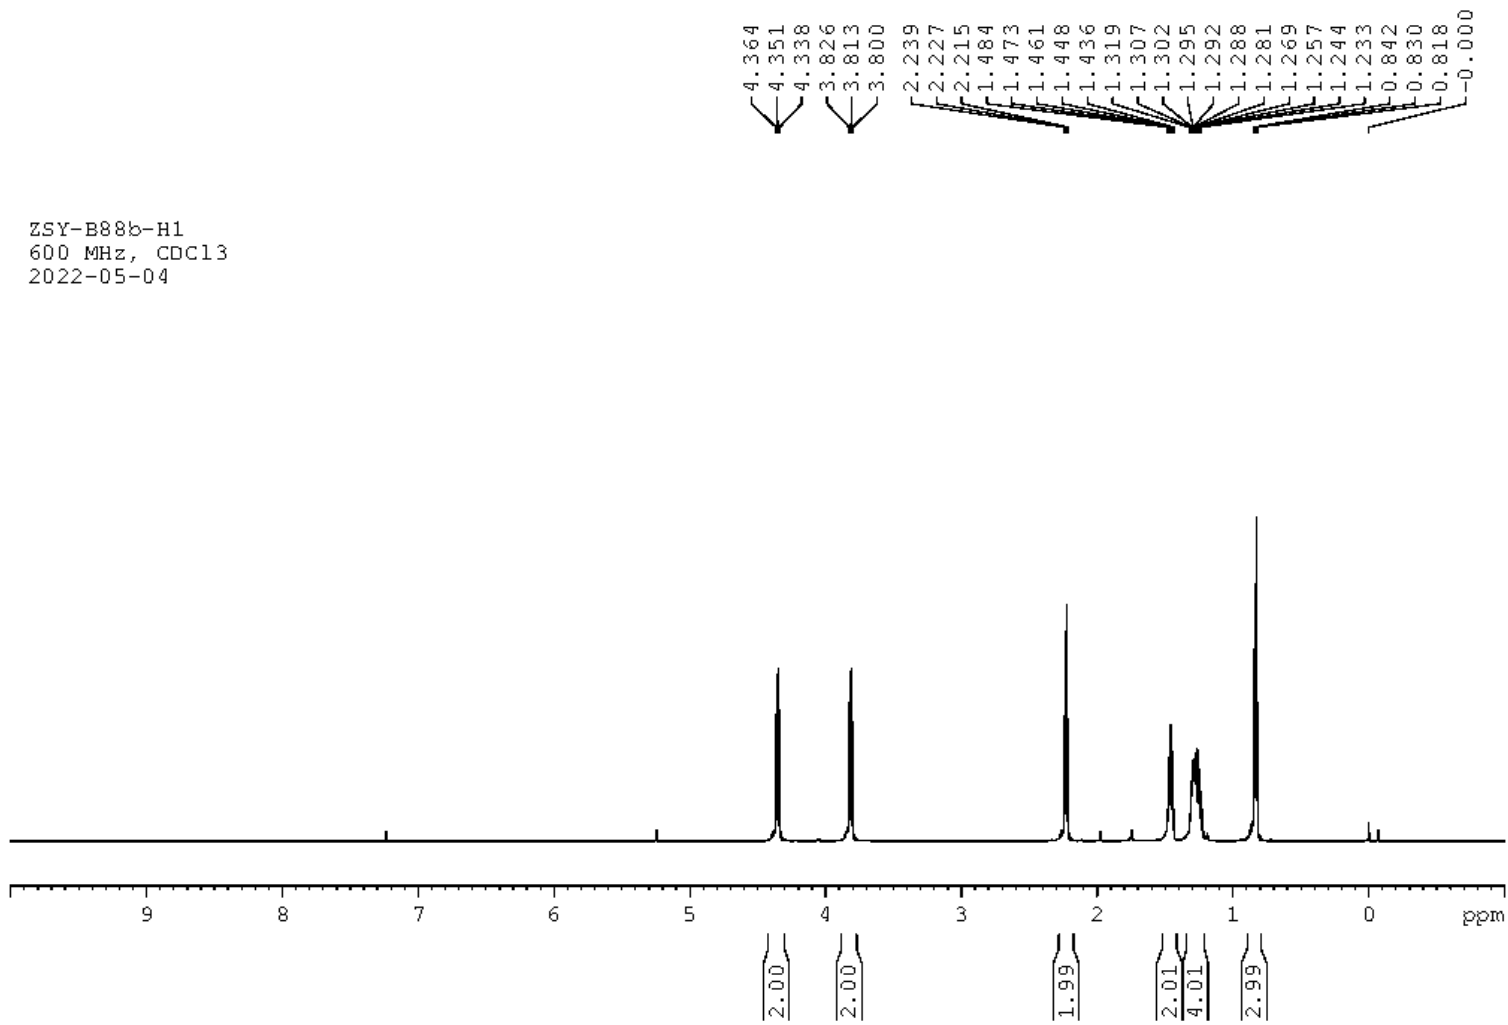



ZSY-B888b-C13  
150 MHz, CDCl3  
2022-05-04

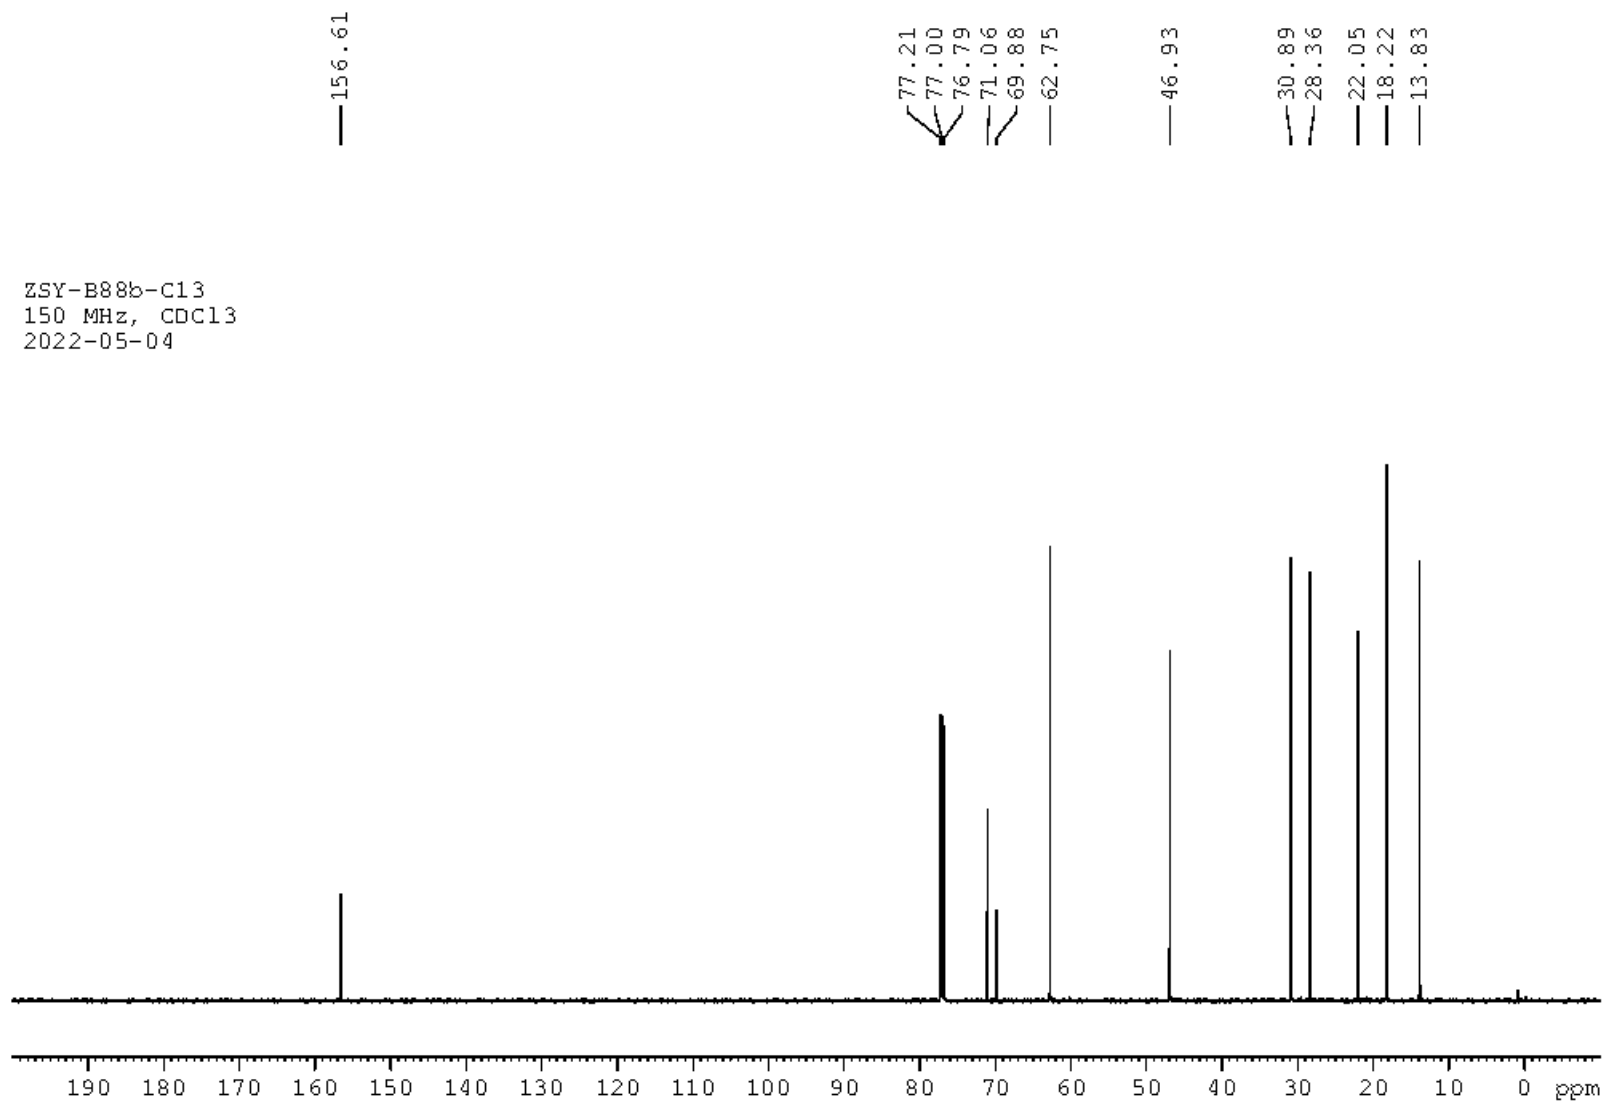

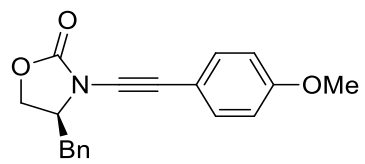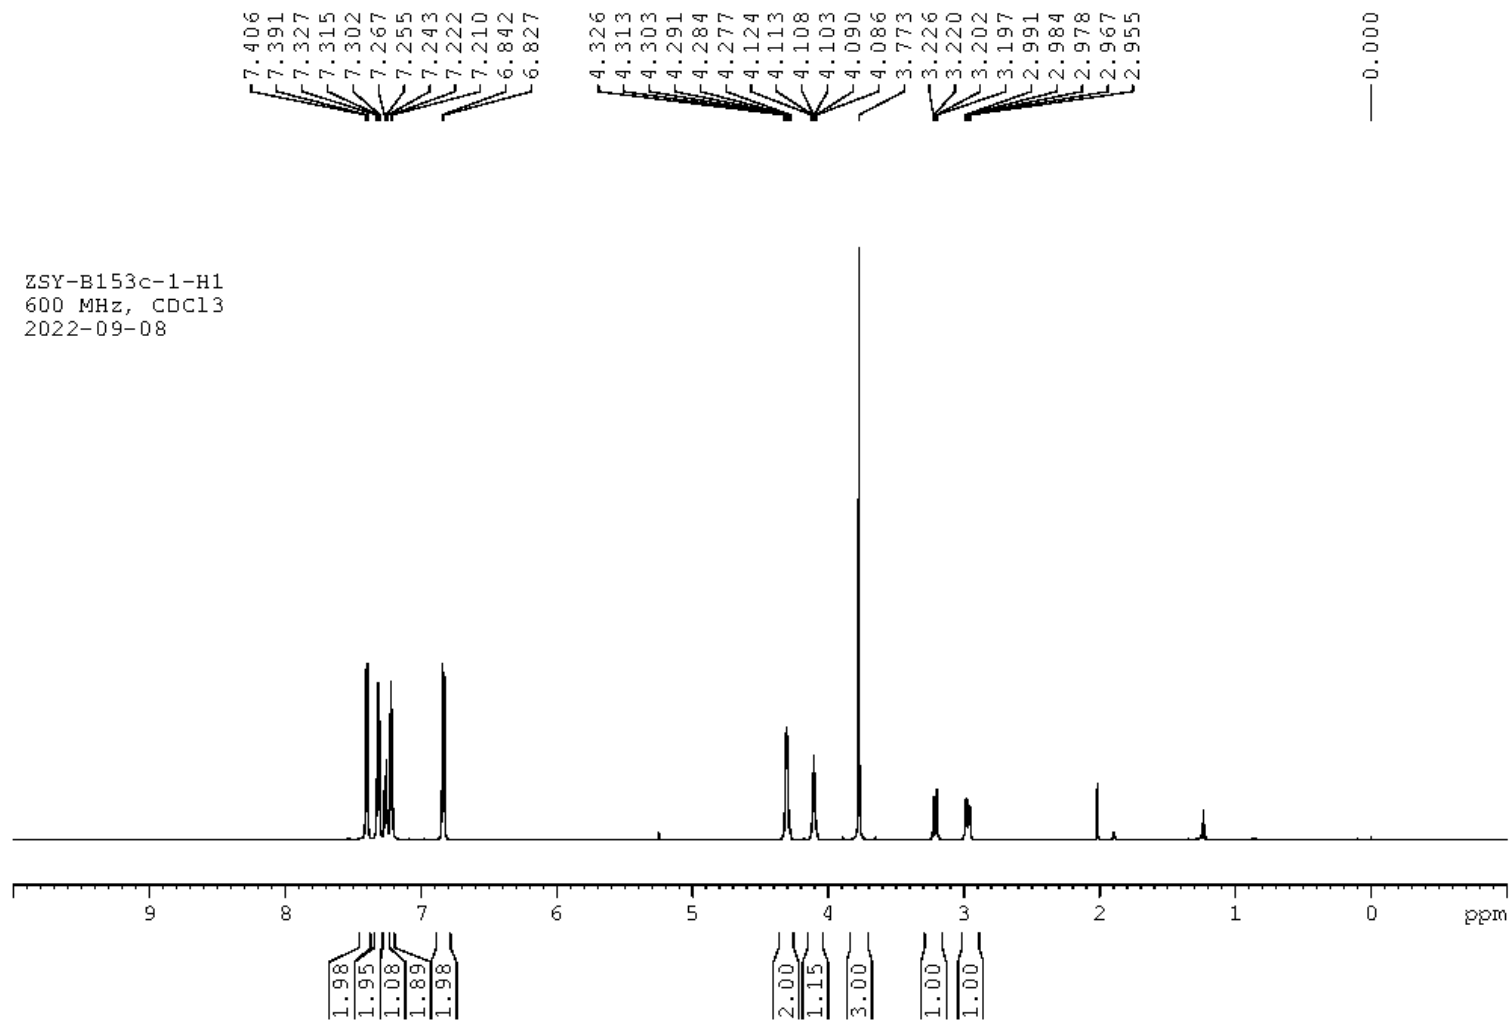

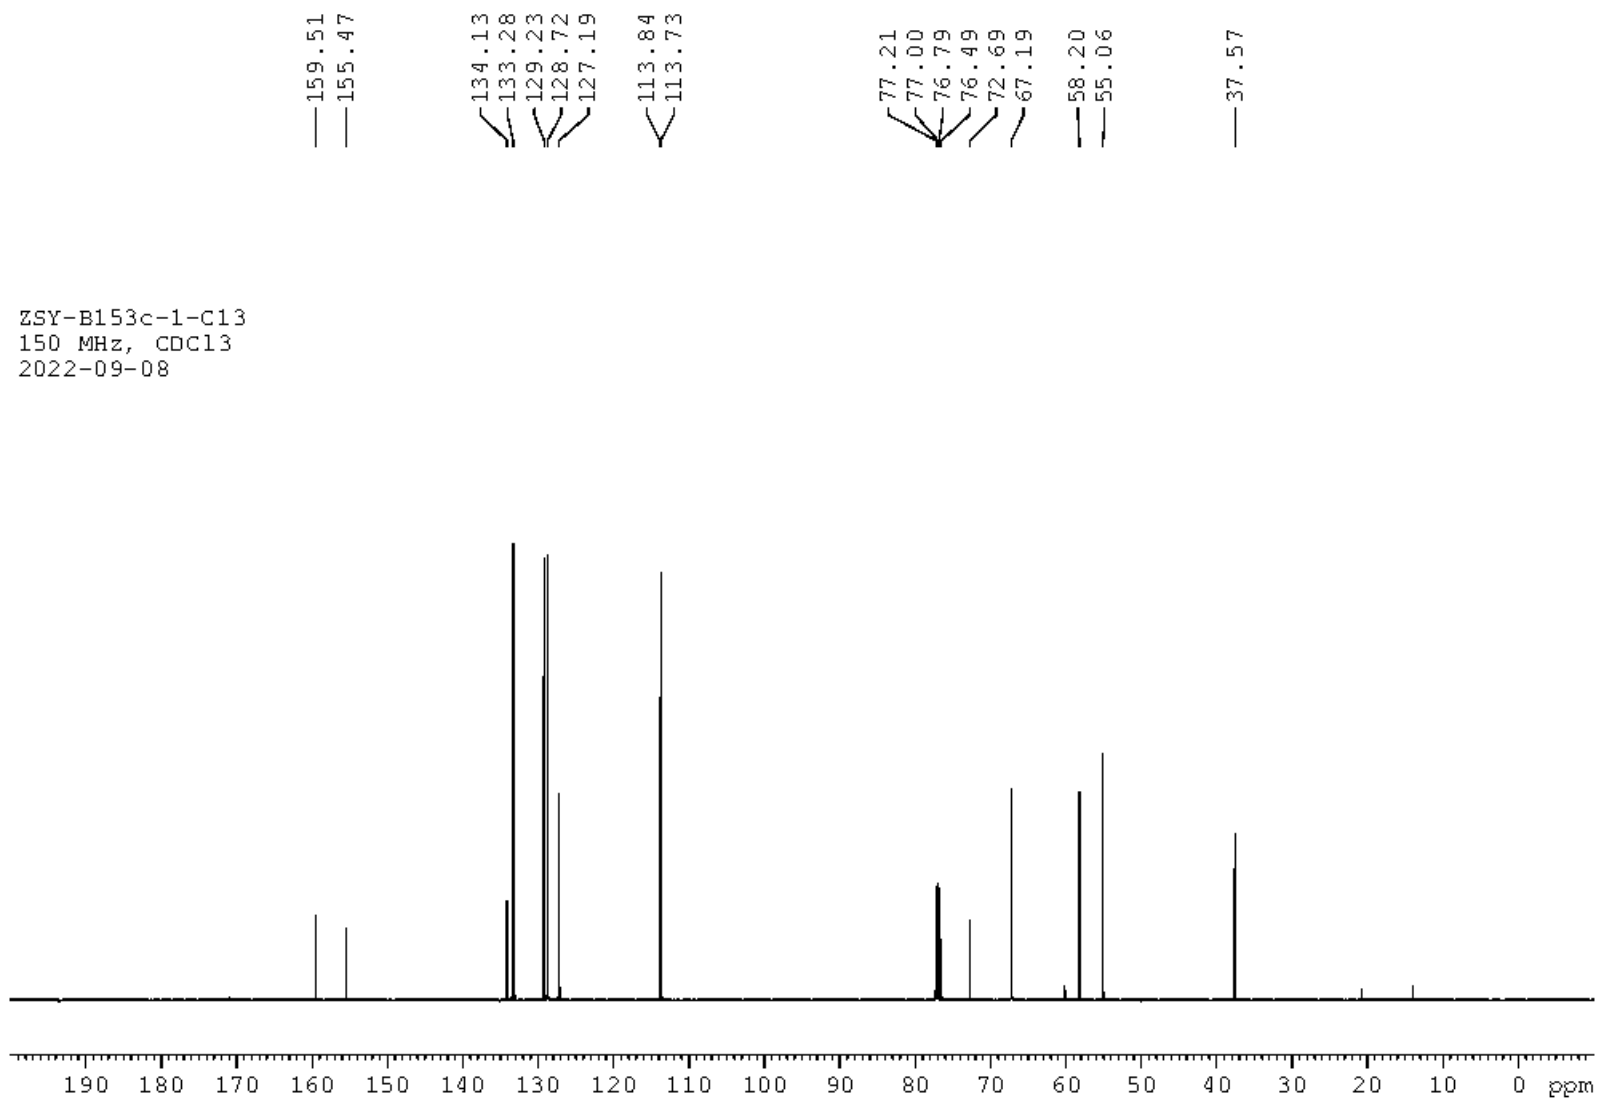

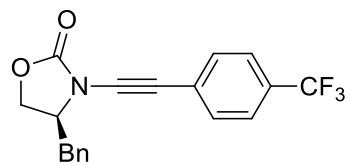

7.561  
7.547  
7.501  
7.488  
7.360  
7.348  
7.336  
7.305  
7.293  
7.281  
7.253  
7.252  
7.240

4.415  
4.402  
4.395  
4.388  
4.382  
4.200  
4.183  
4.178  
4.162  
3.277  
3.270  
3.253  
3.247  
3.046  
3.034  
3.022  
3.010

— 0.000

ZSY-B162a-H1  
600 MHz, CDCl<sub>3</sub>  
2022-09-16

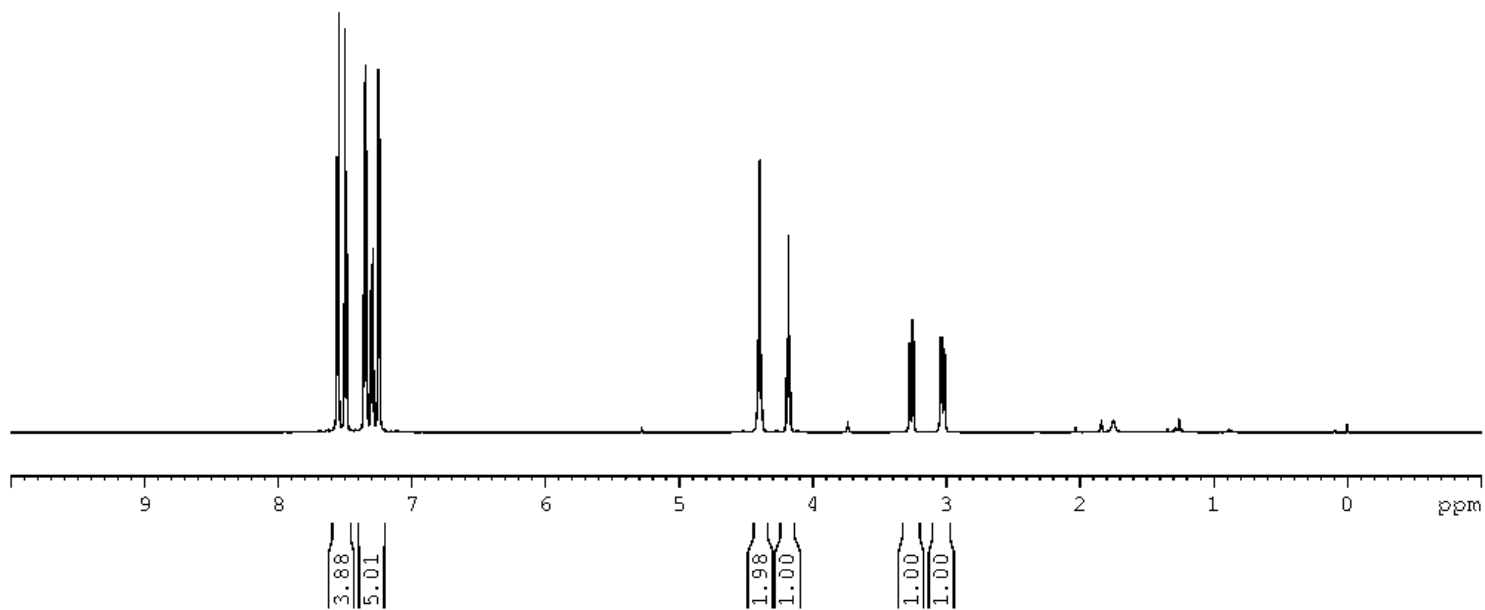

ZSY-B162a-C13  
150 MHz, CDCl3  
2022-09-16

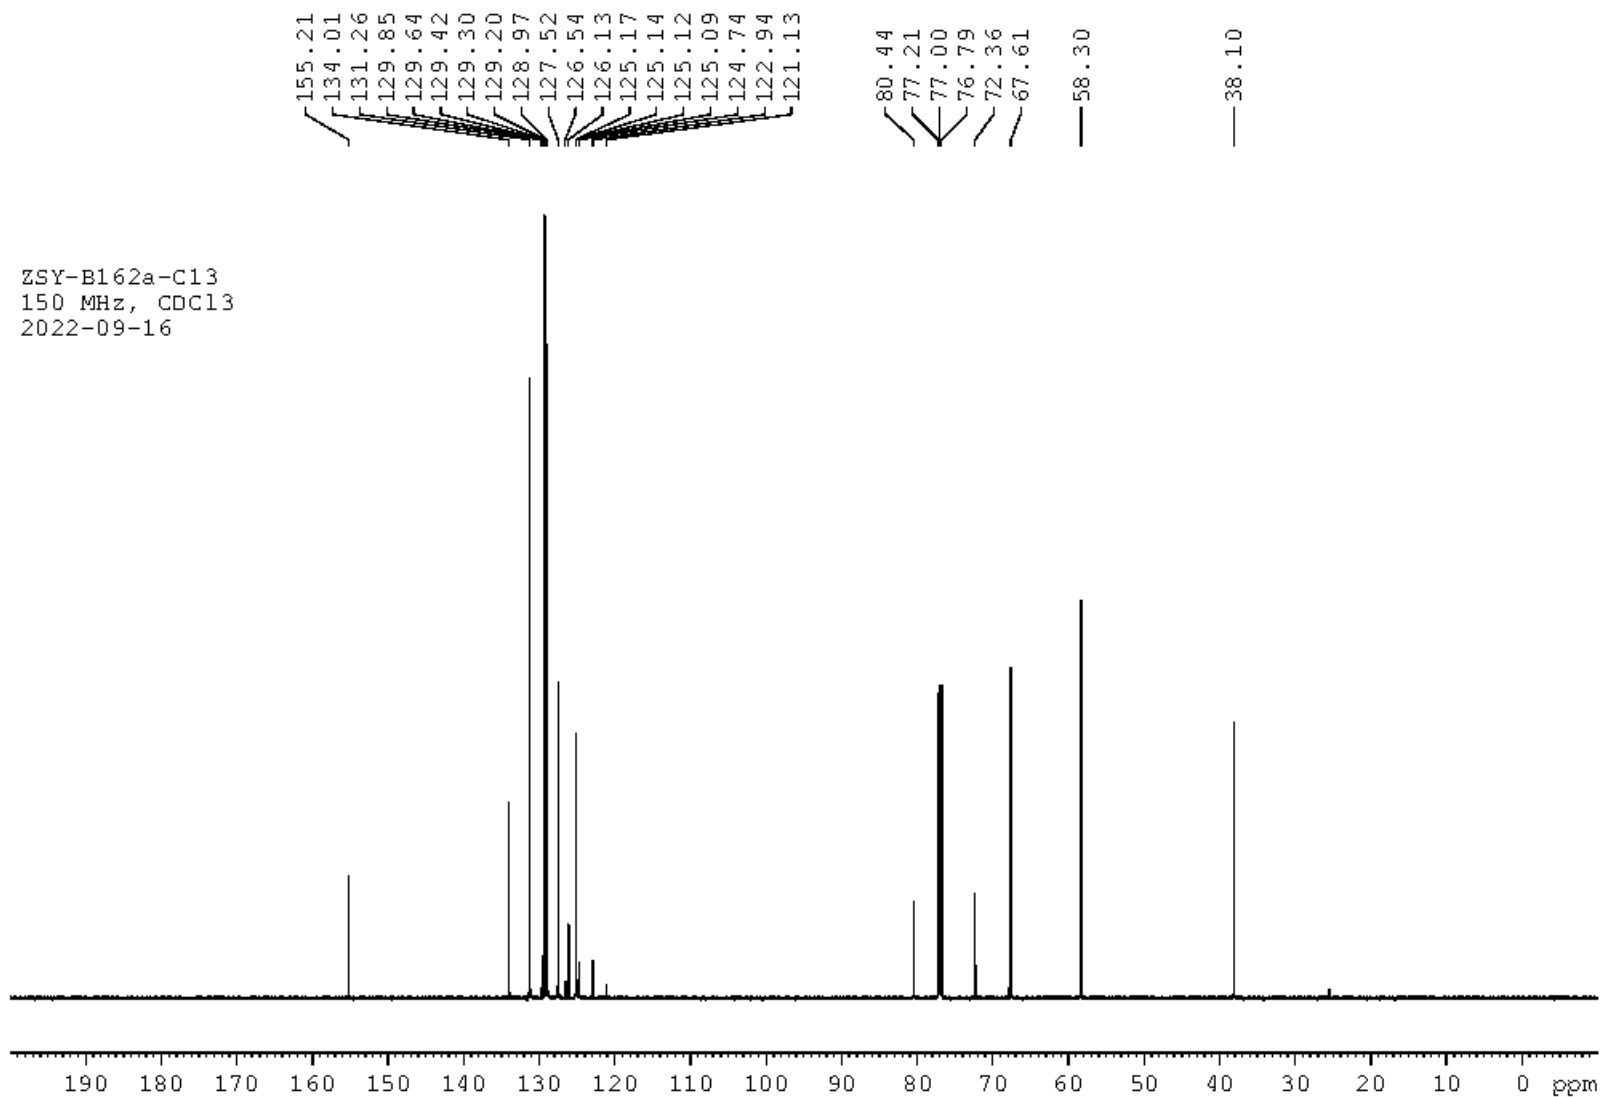

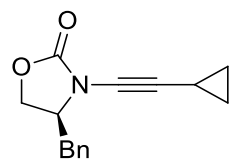

3mm

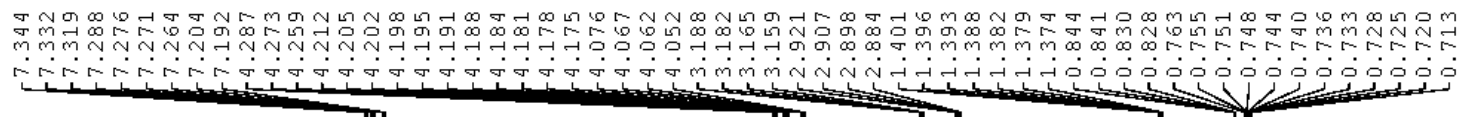

ZSY-B136b-H1  
600 MHz, CDCl<sub>3</sub>  
2022-07-17

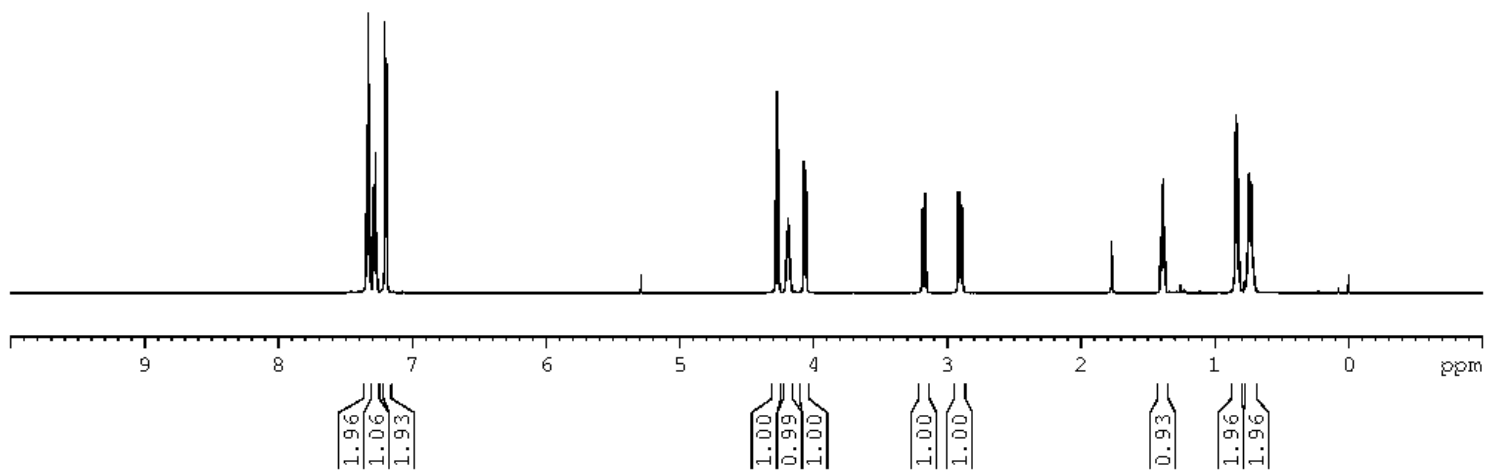

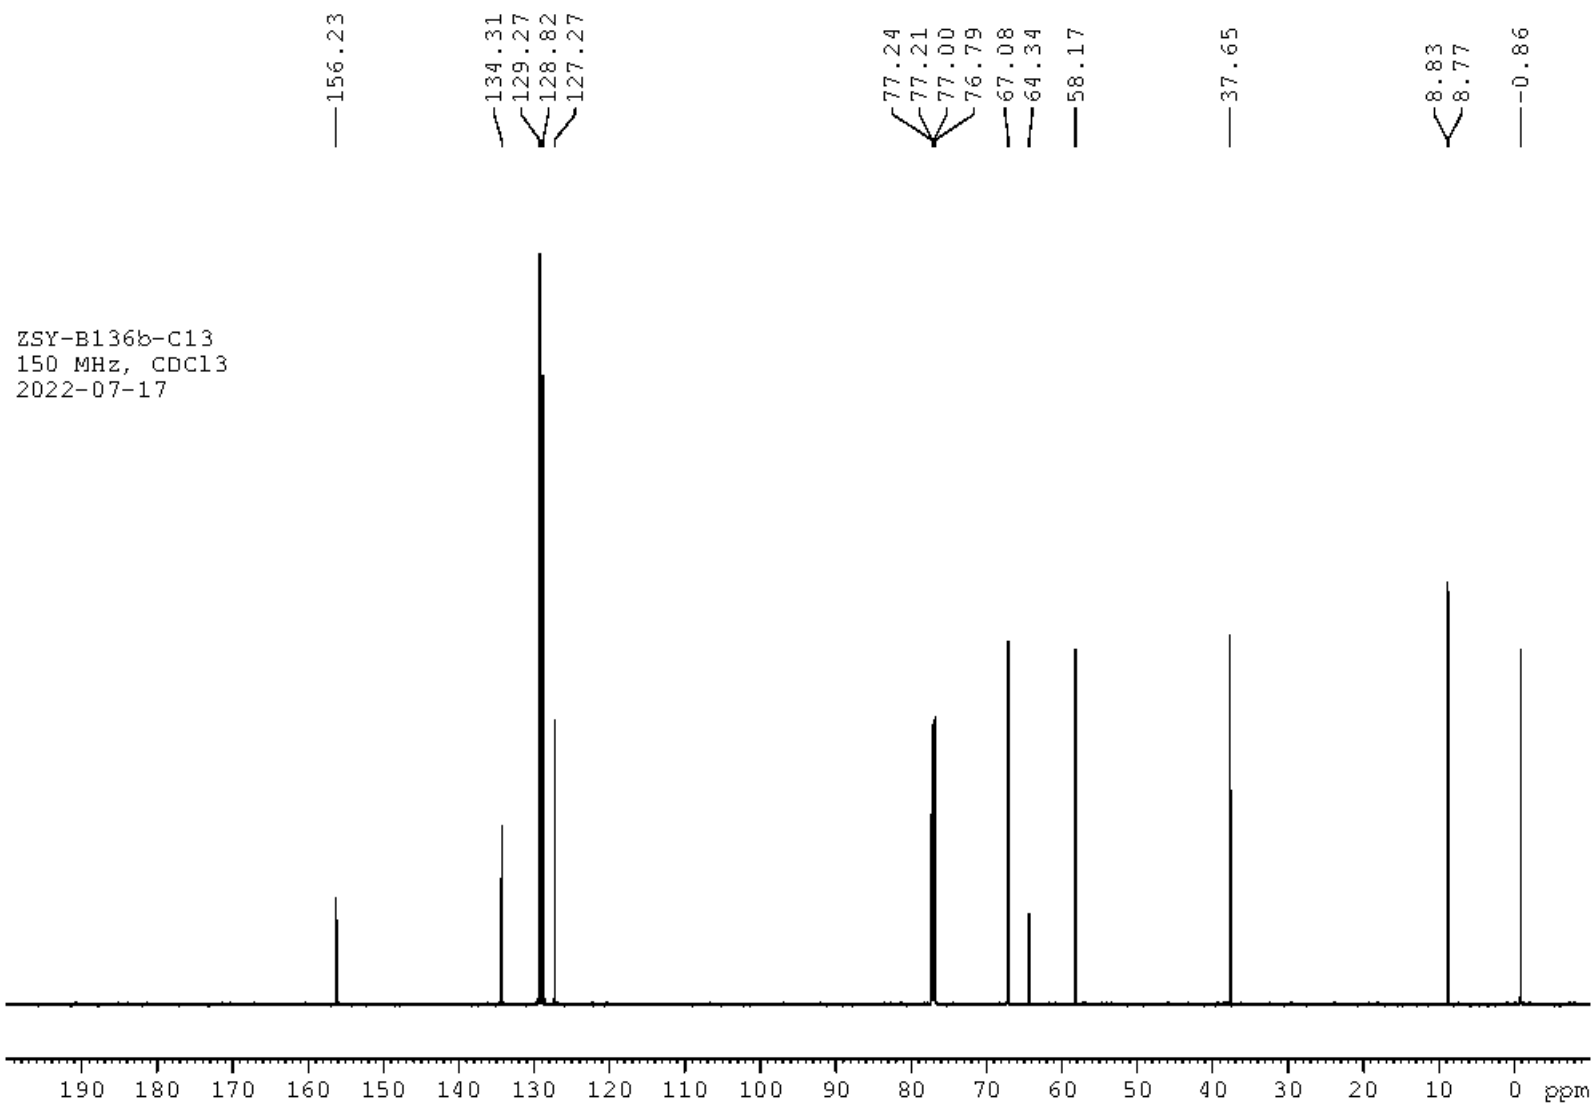

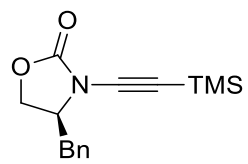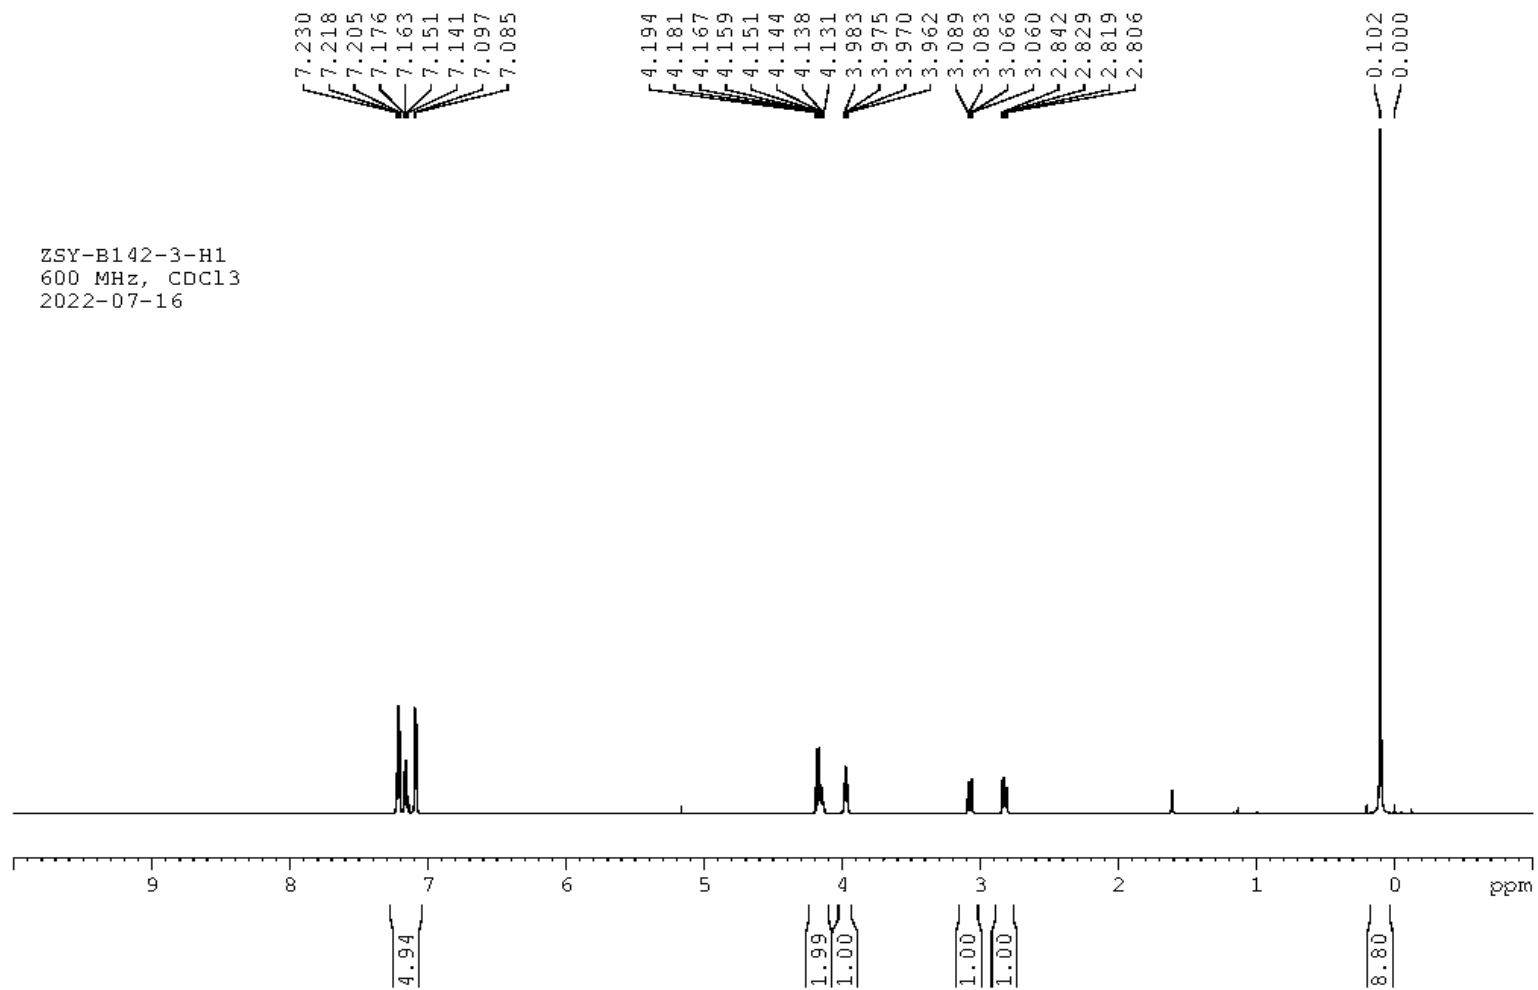



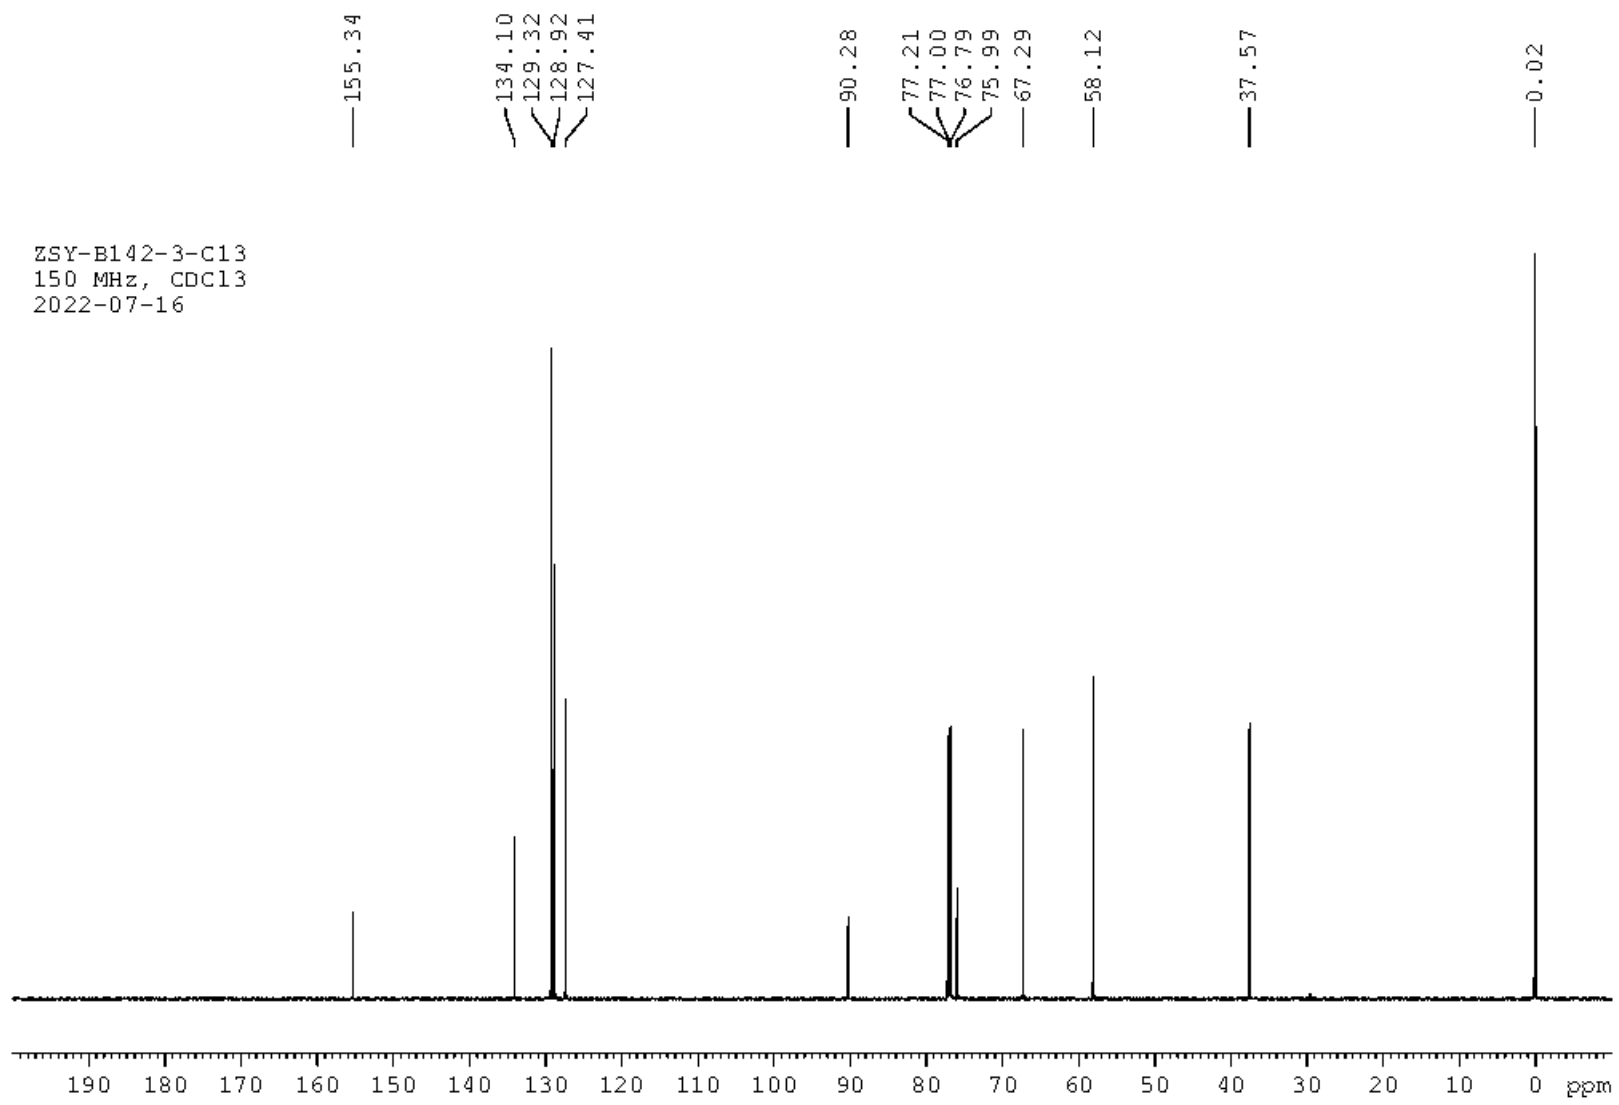

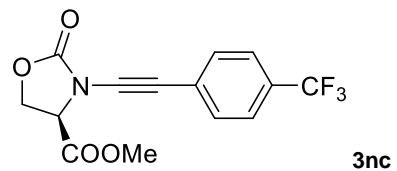

7.574  
7.560  
7.541  
7.527

4.726  
4.719  
4.710  
4.704  
4.693  
4.678  
4.663  
4.548  
4.542  
4.534  
4.527  
3.908

ZSY-C165B-H1  
600 MHz, CDCl<sub>3</sub>  
2023-09-05

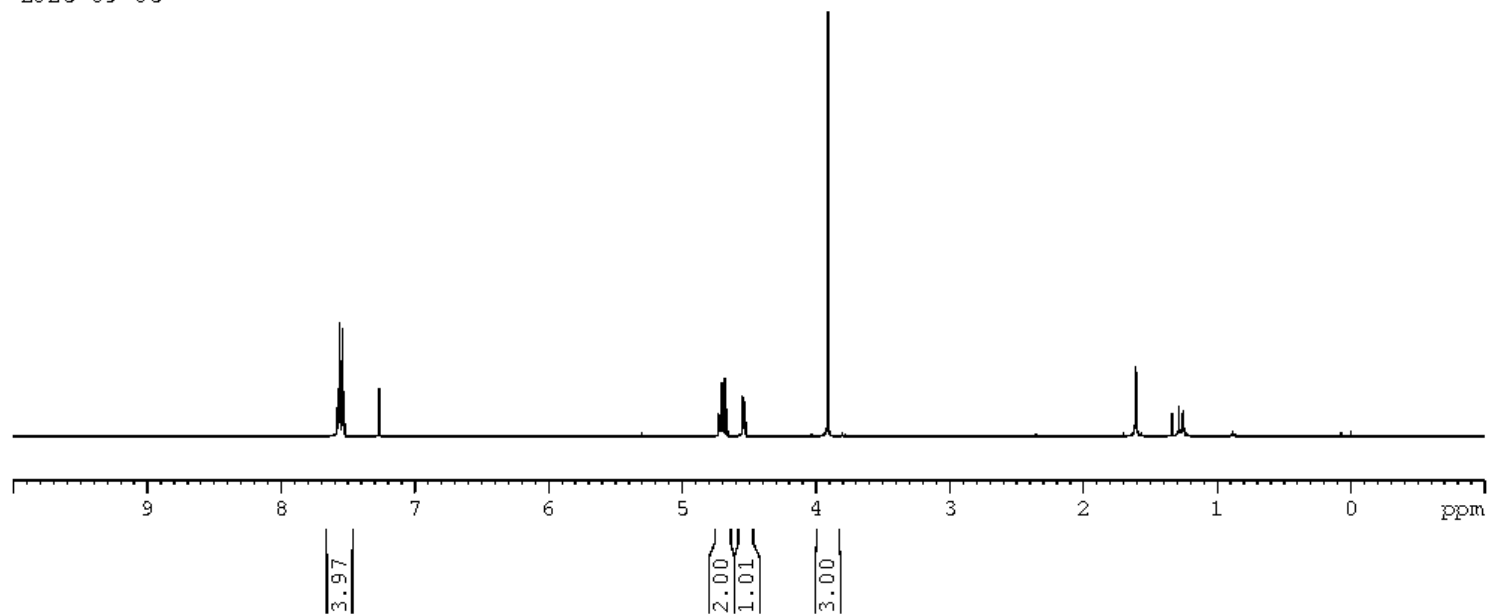

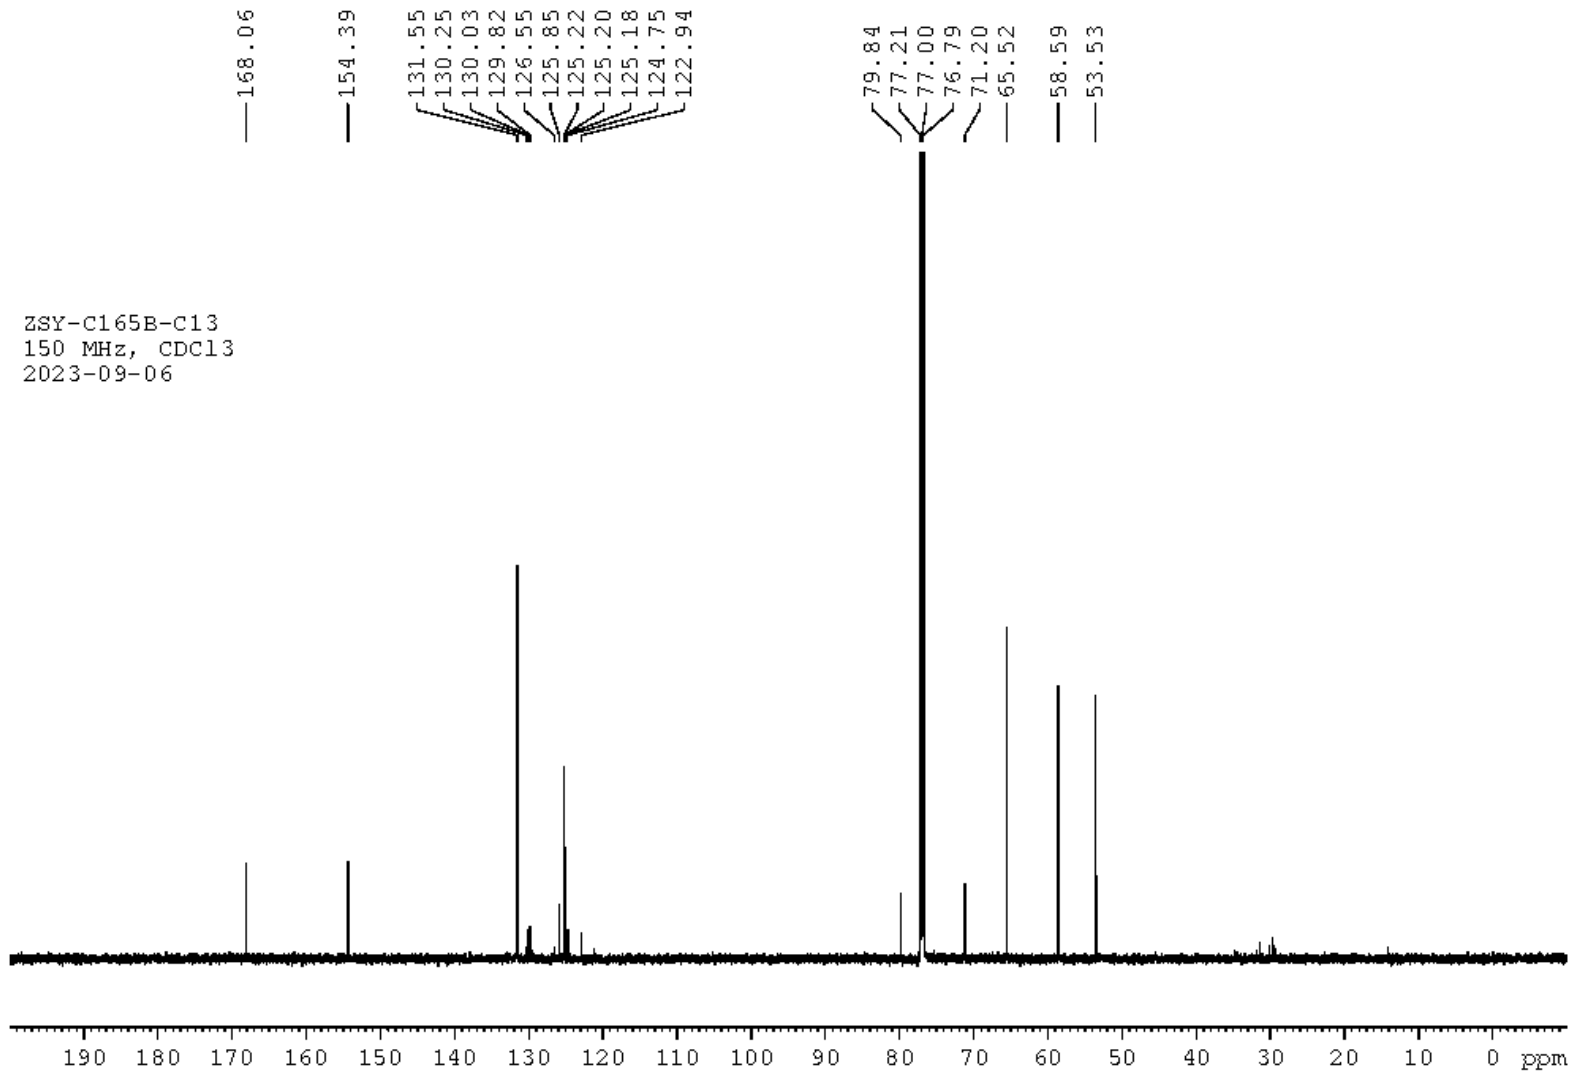

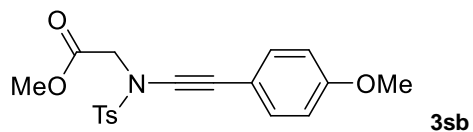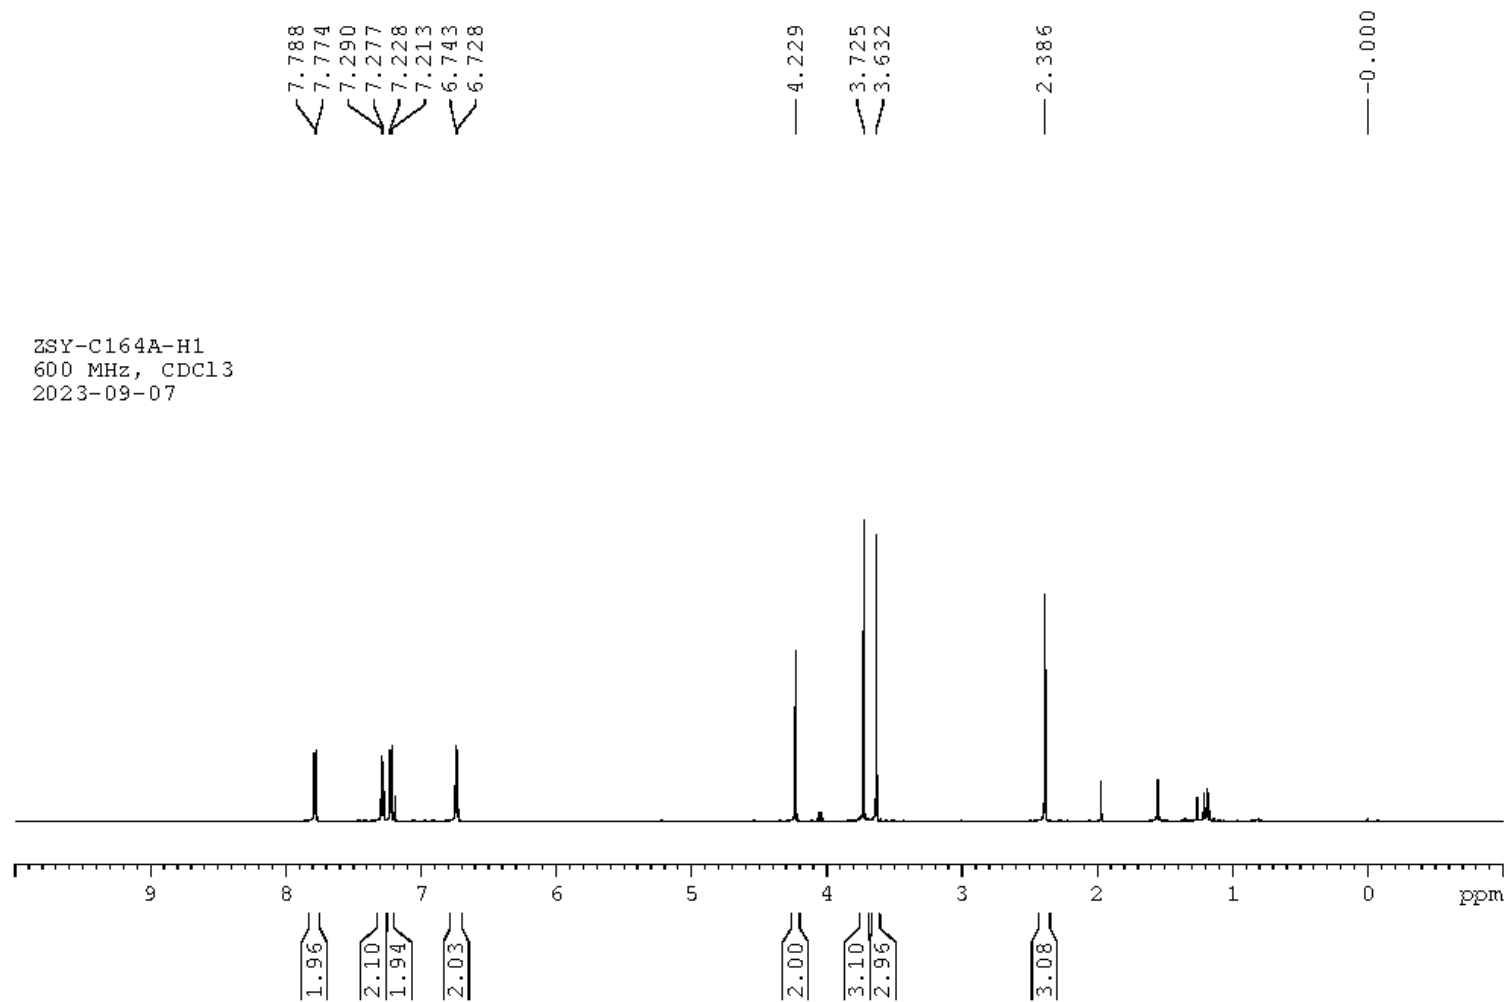

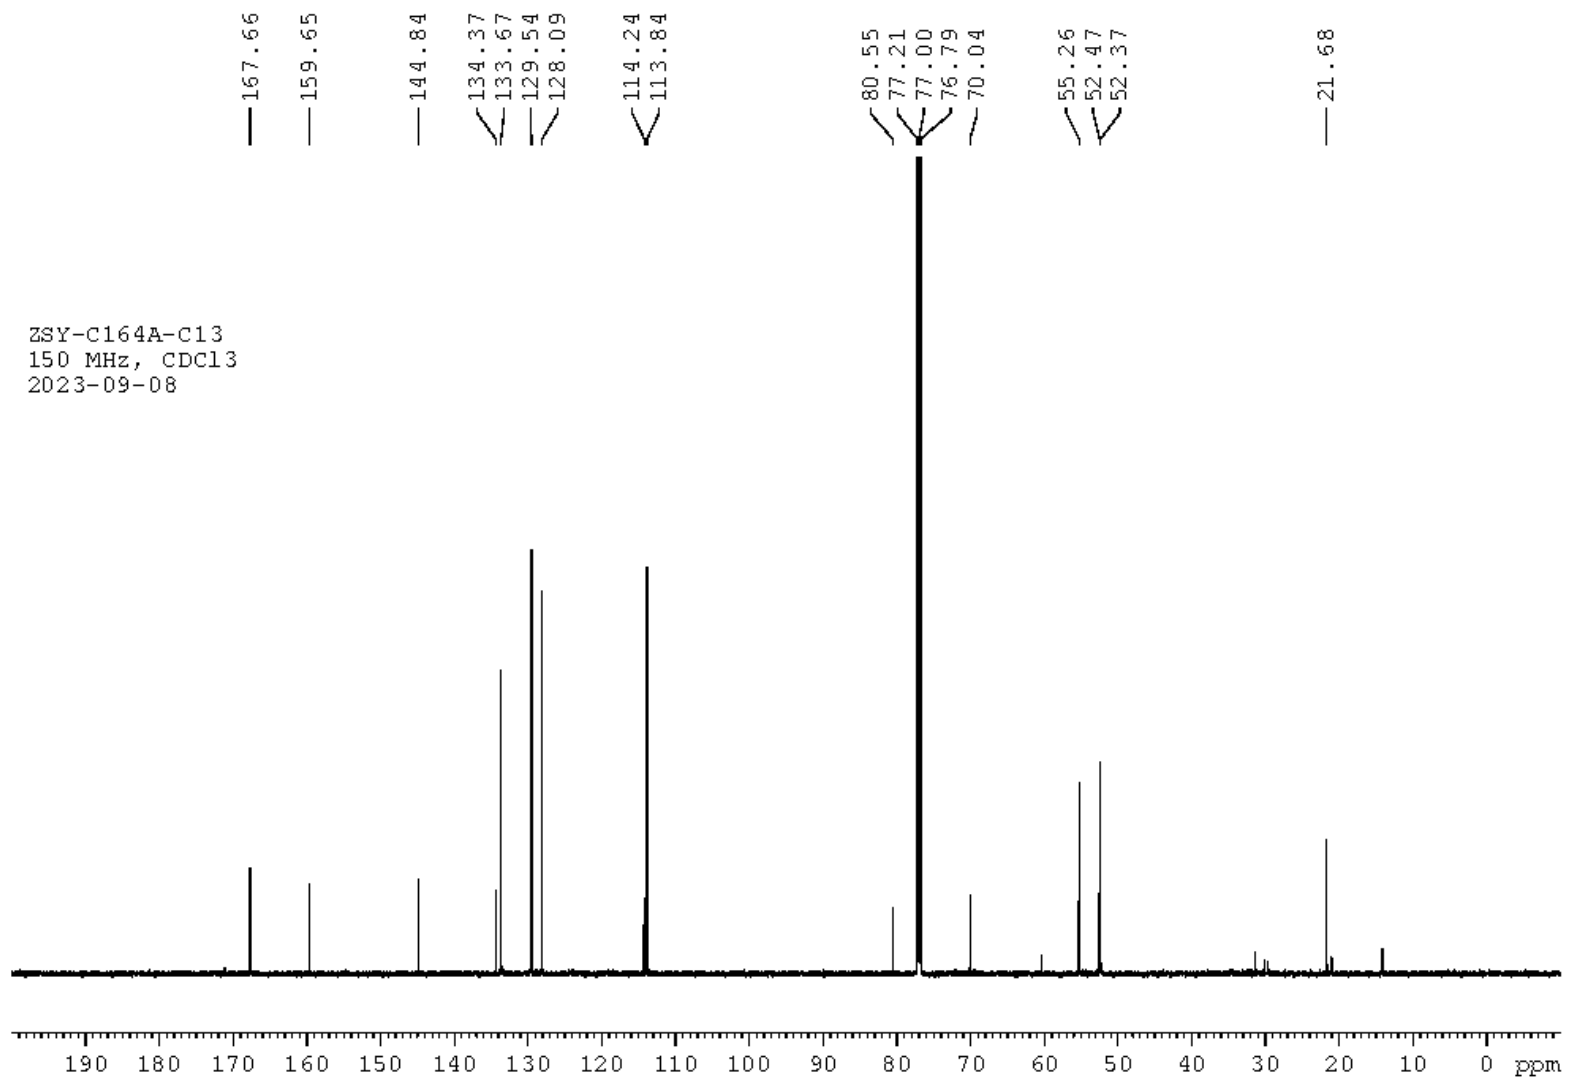

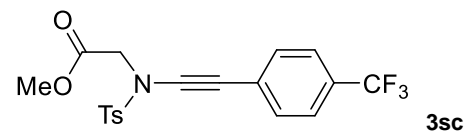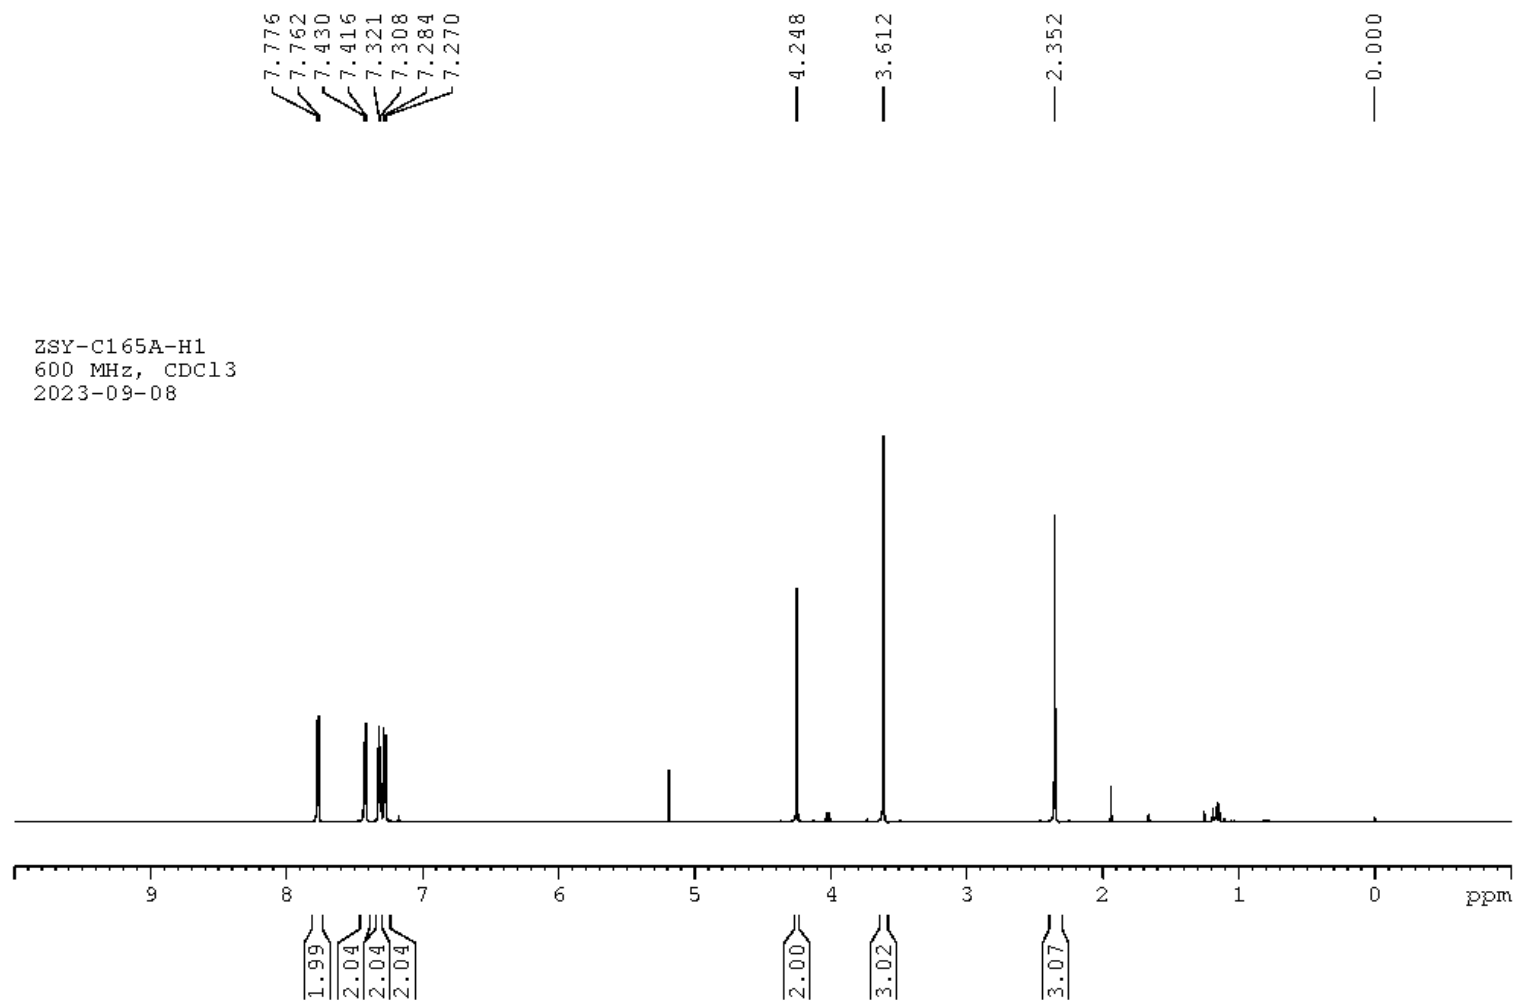

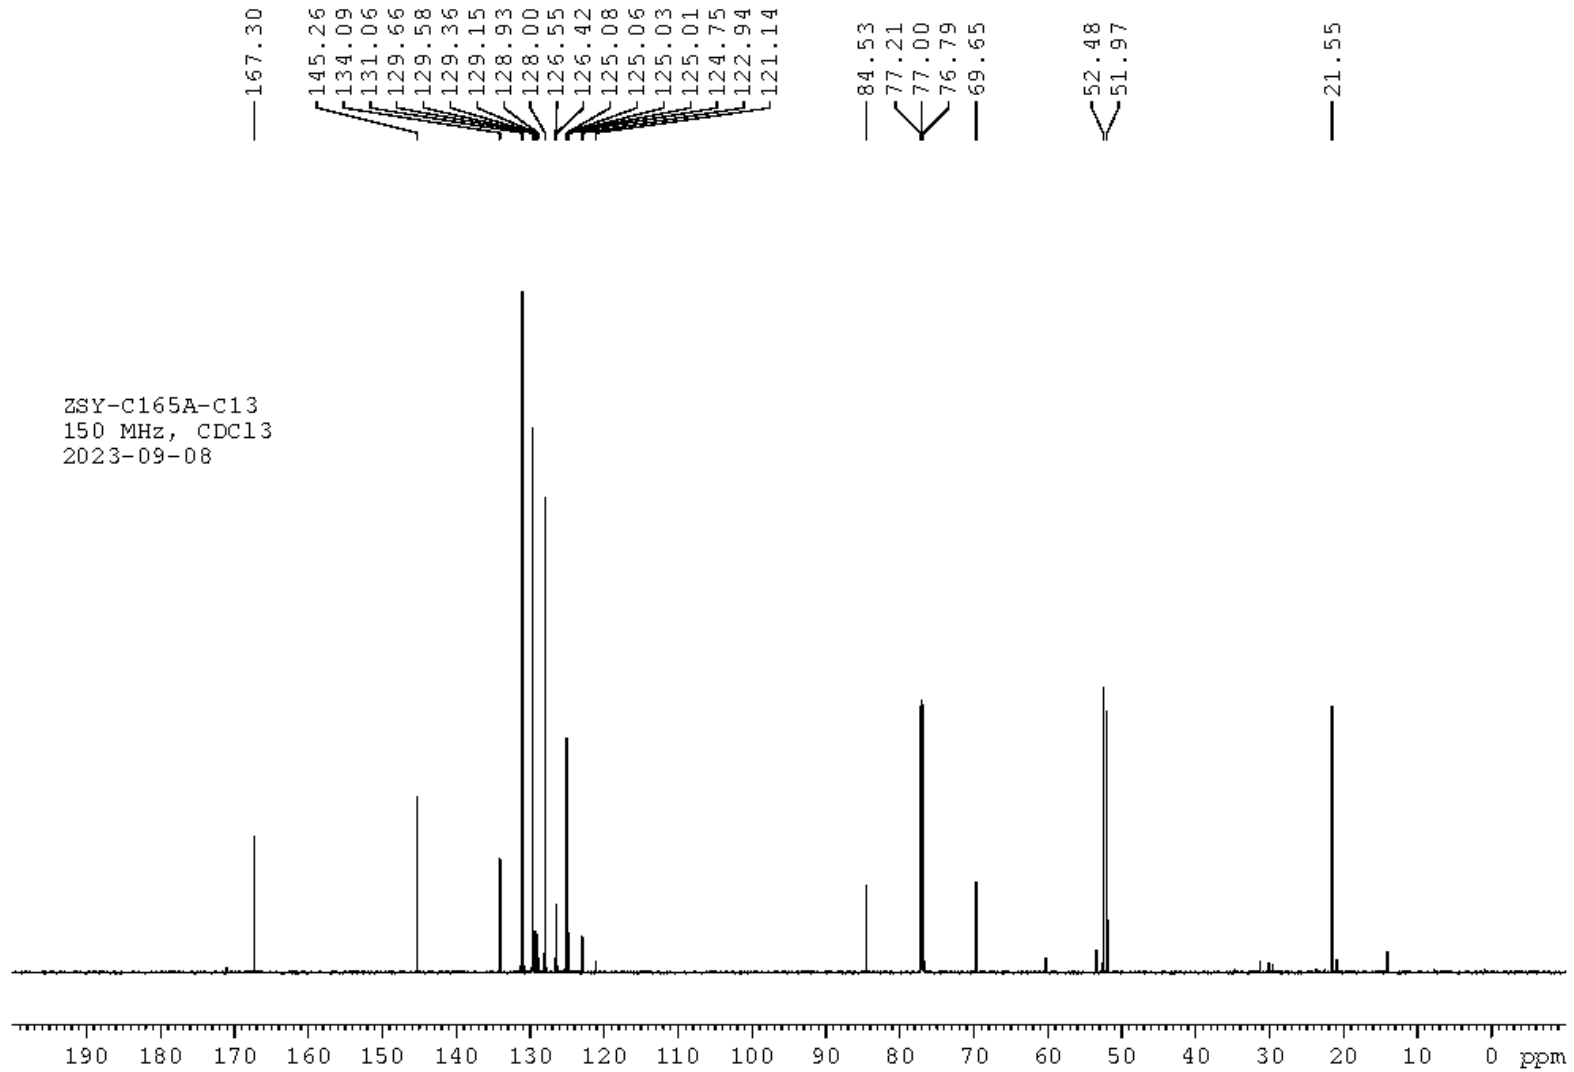

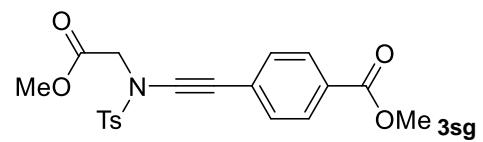

7.951  
7.937  
7.873  
7.859  
7.383  
7.372  
7.360  
7.357

4.340  
3.907  
3.716

2.460

0.000

ZSY-C161B-H1  
600 MHz, CDCl3  
2023-09-16

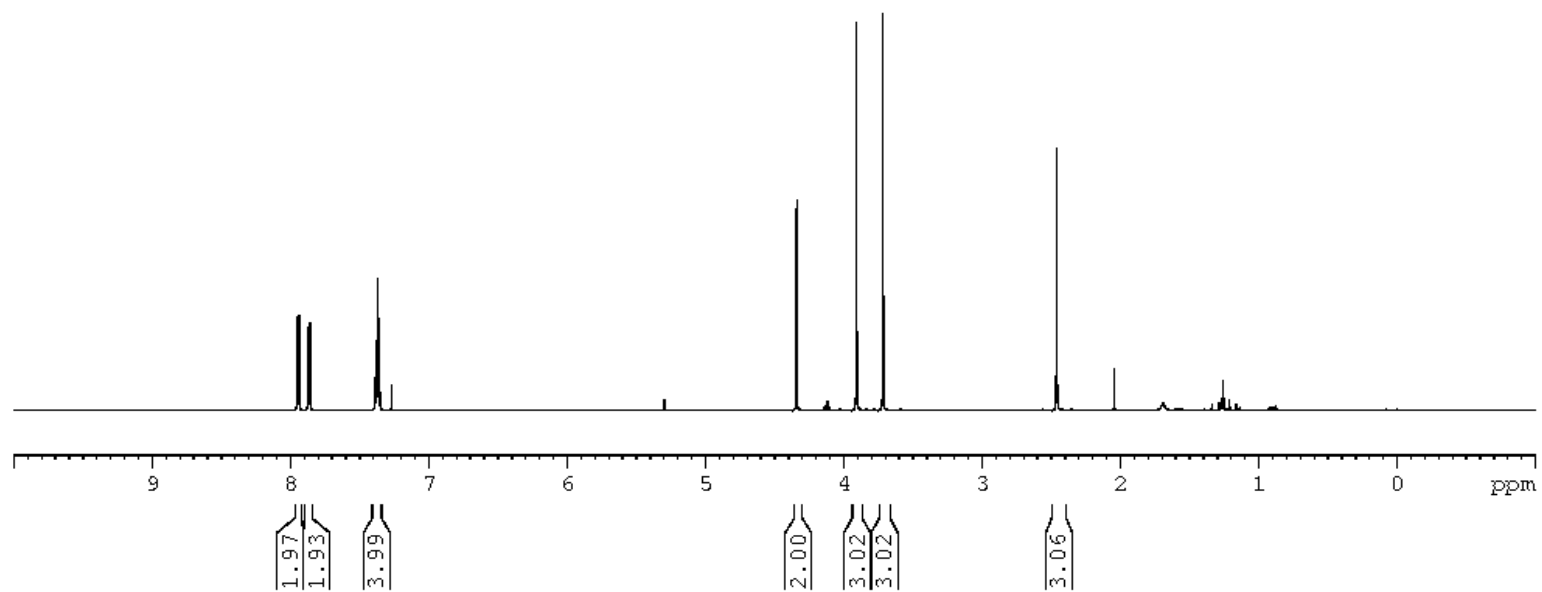



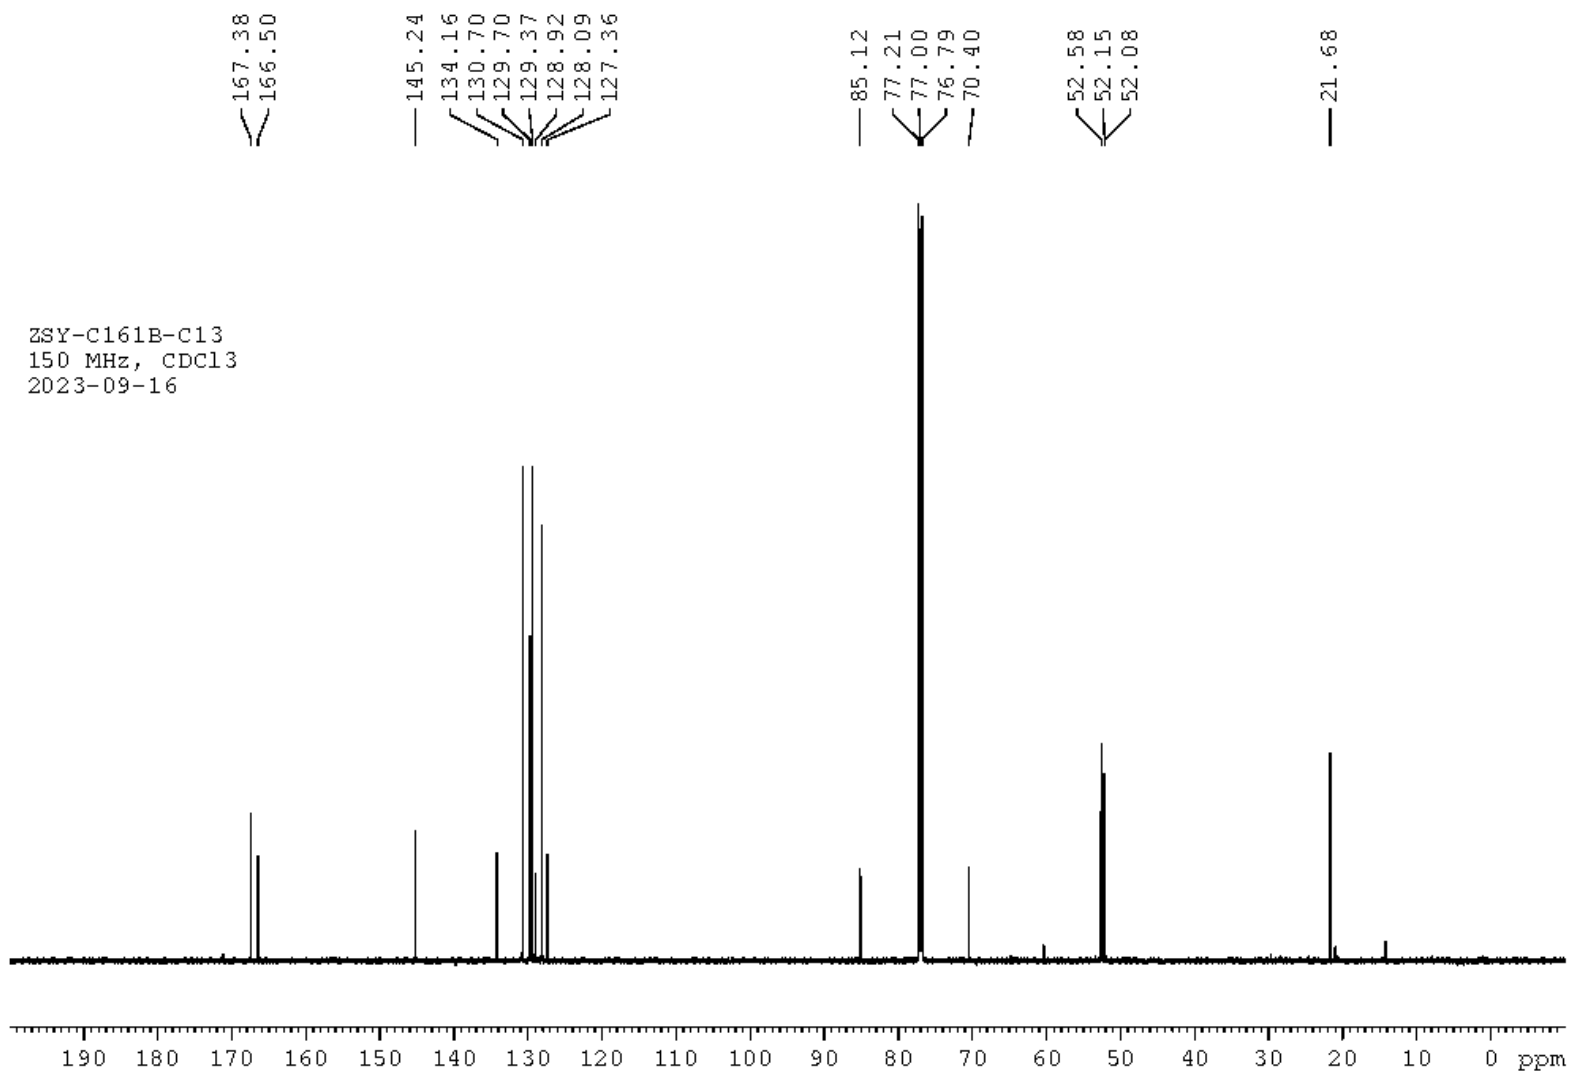

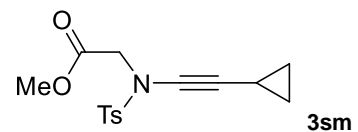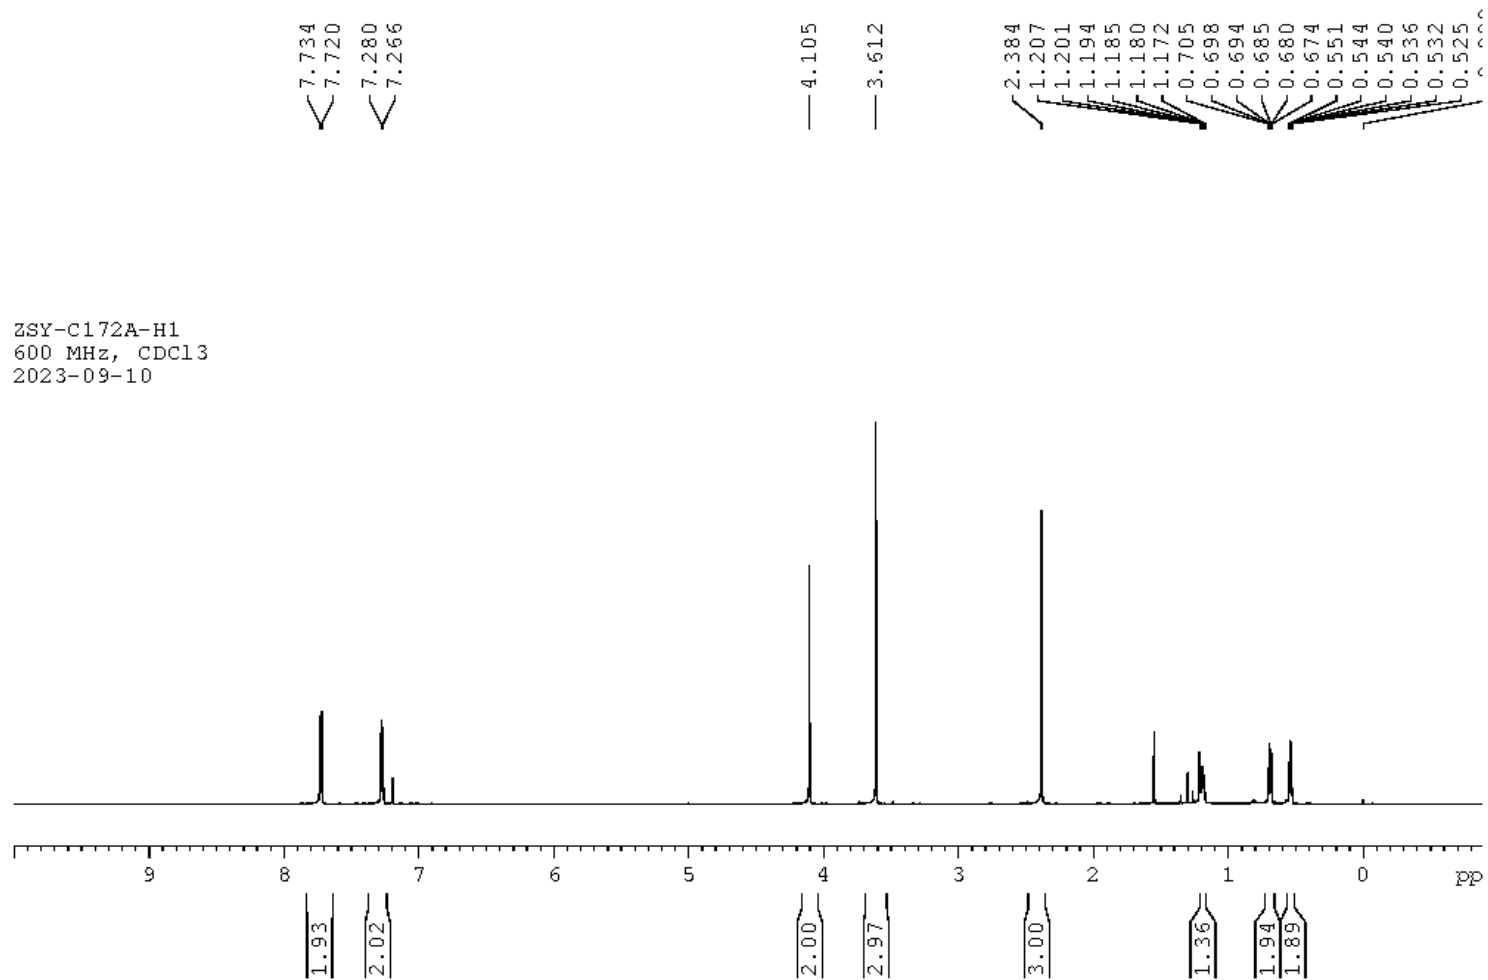

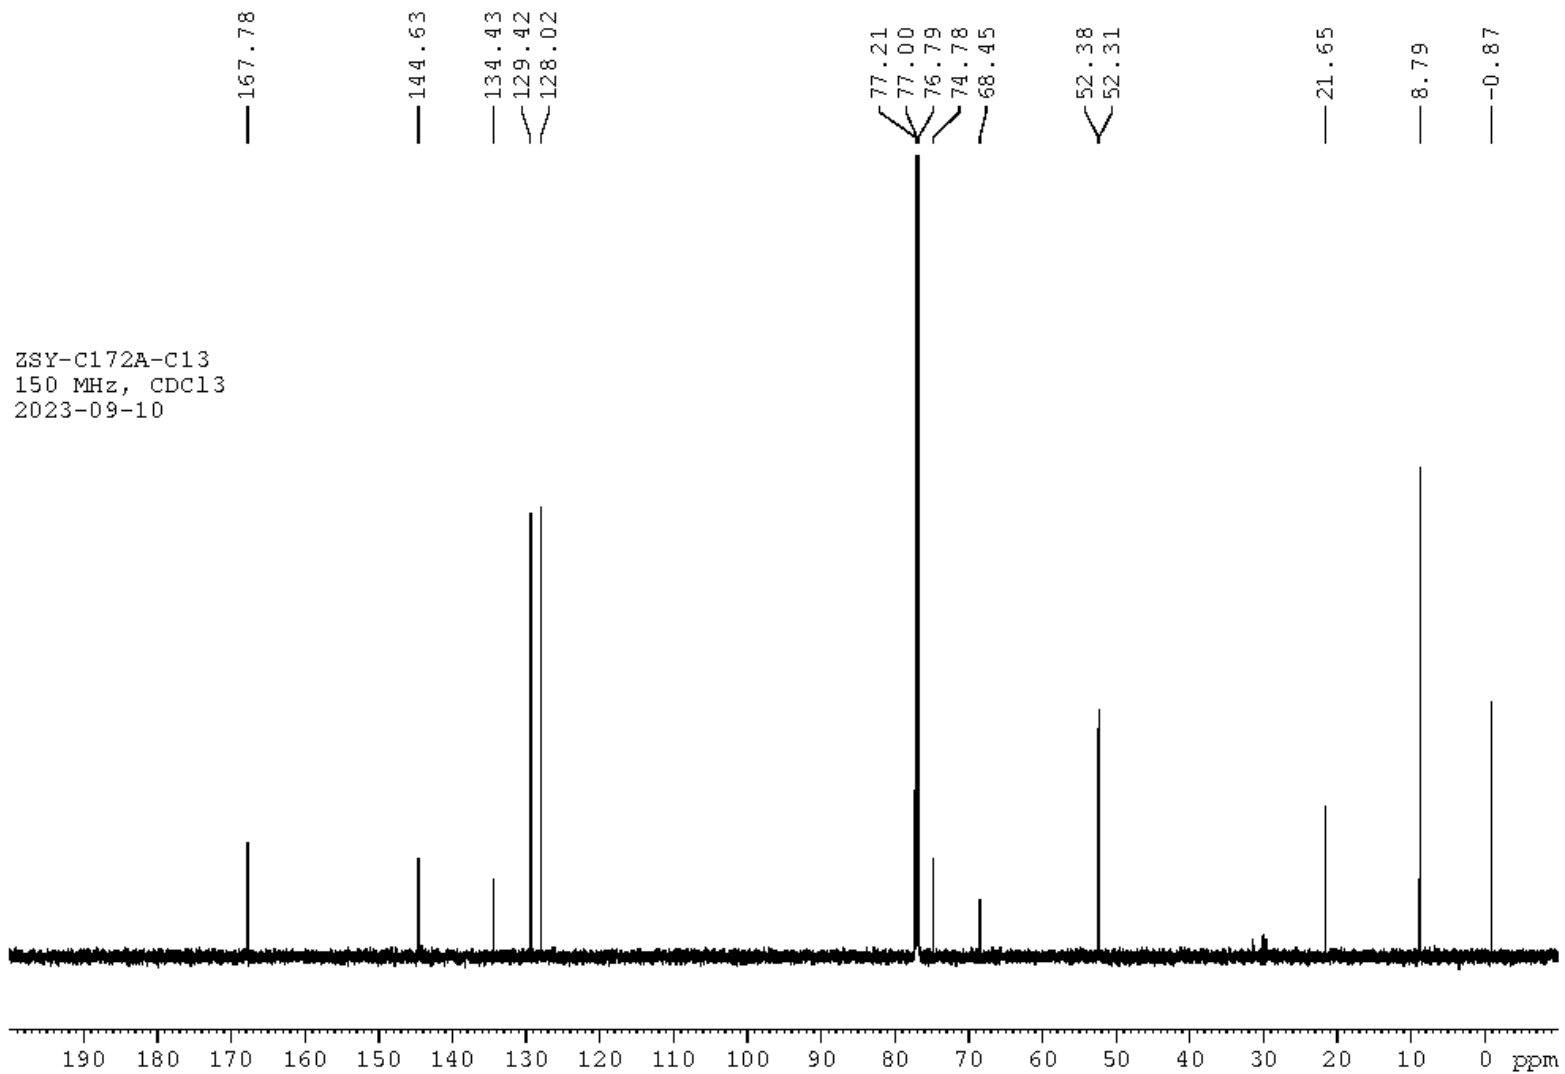

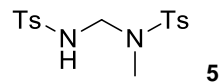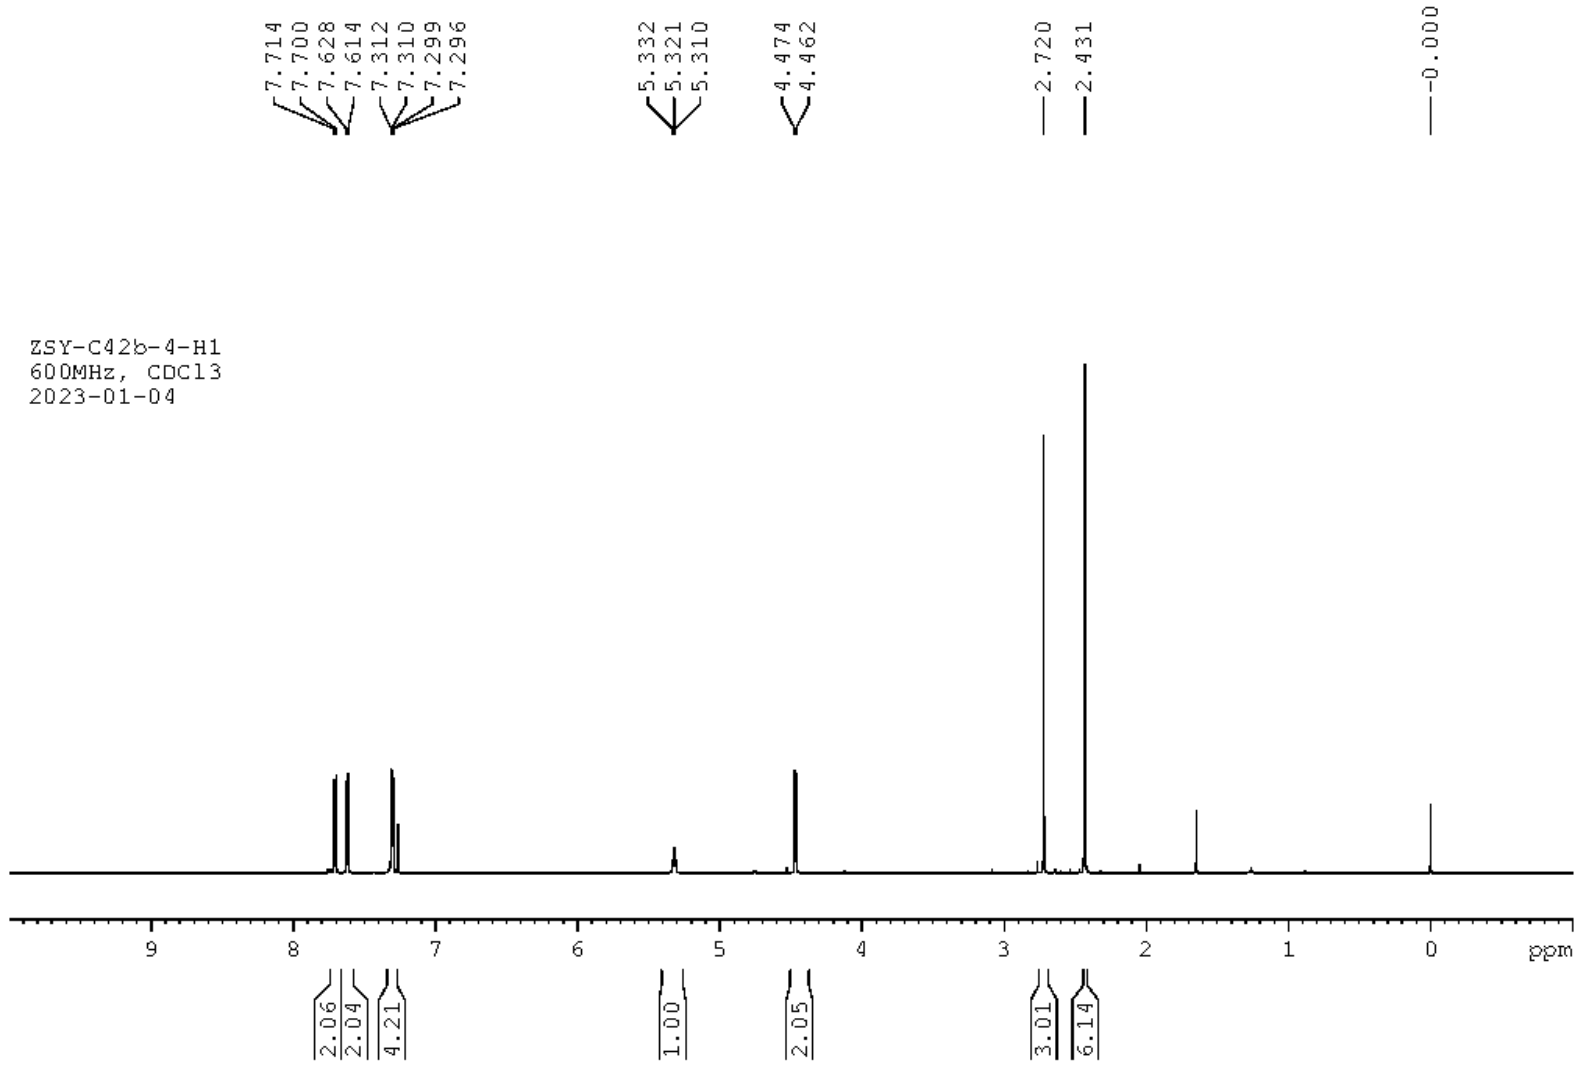

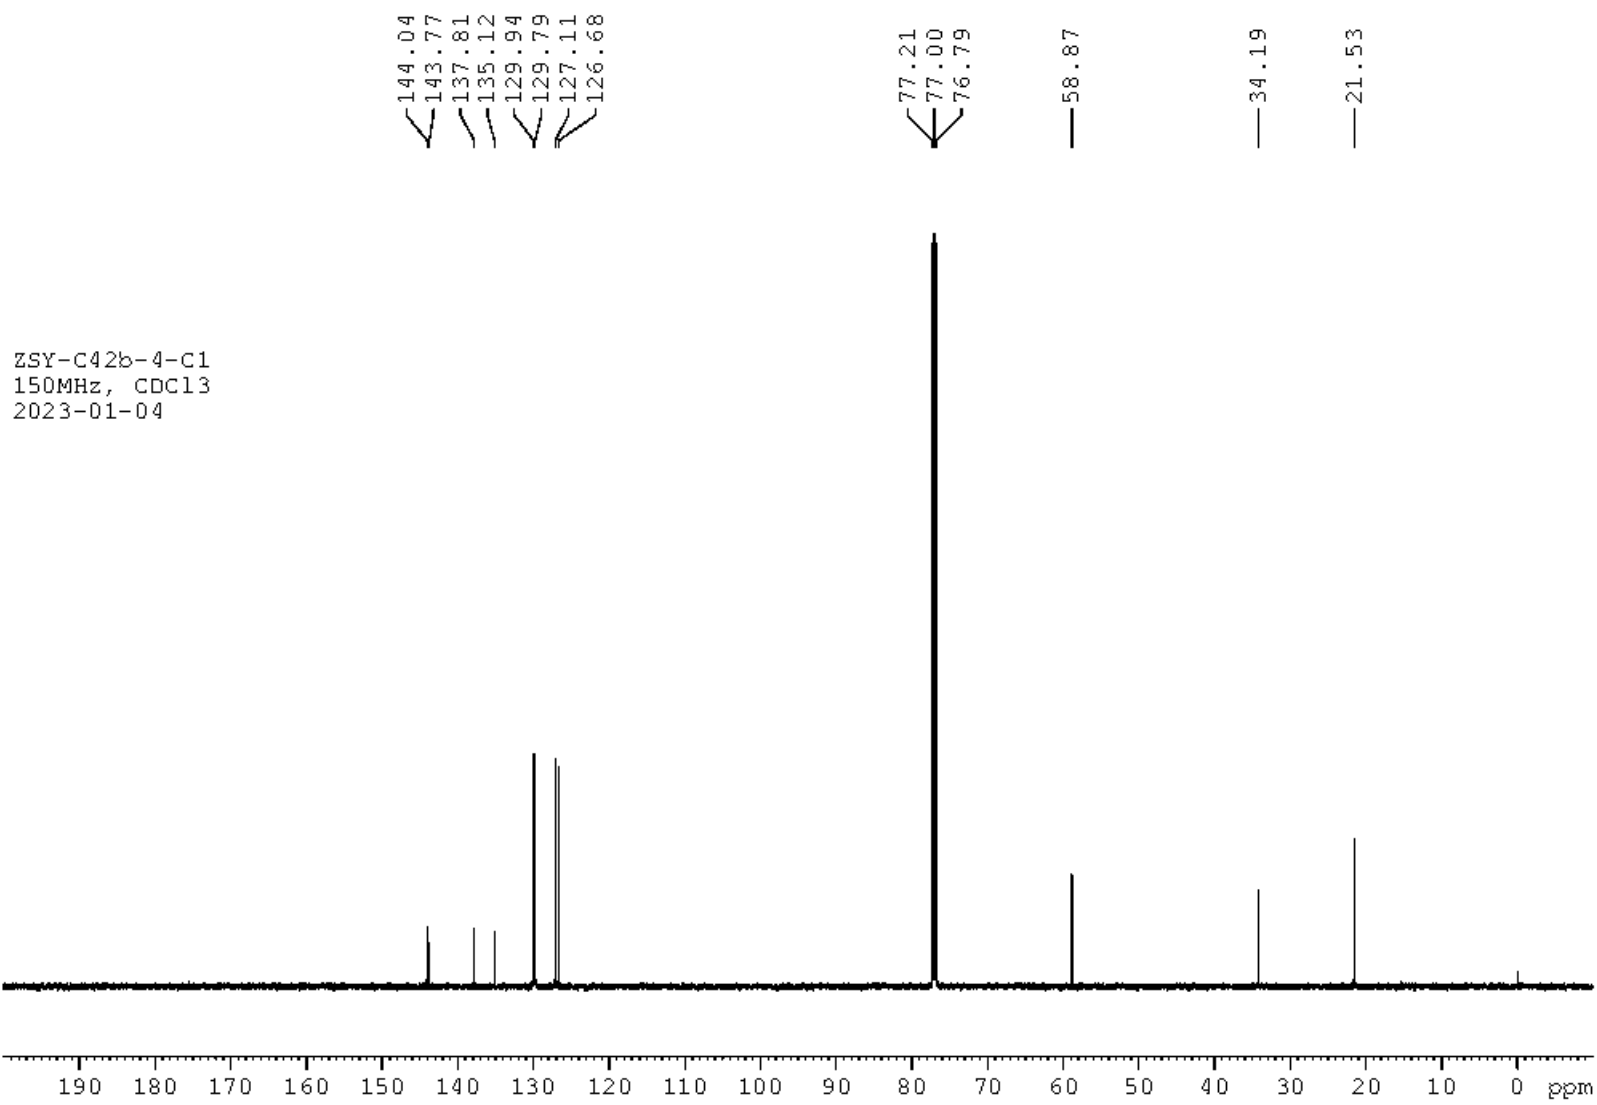

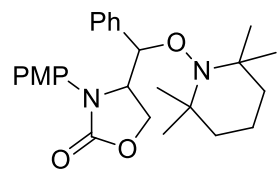

8

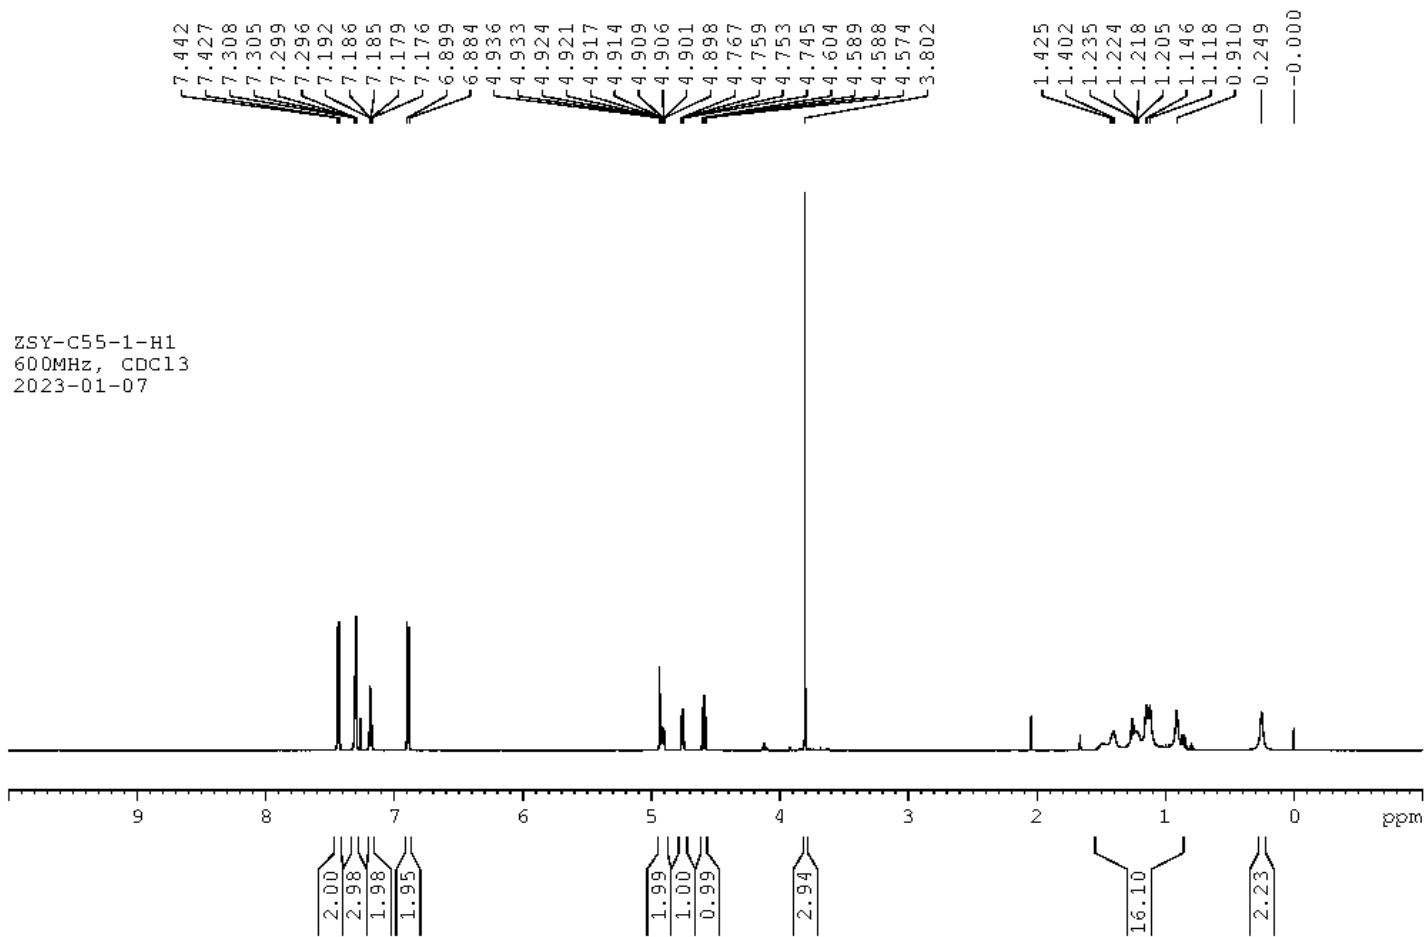

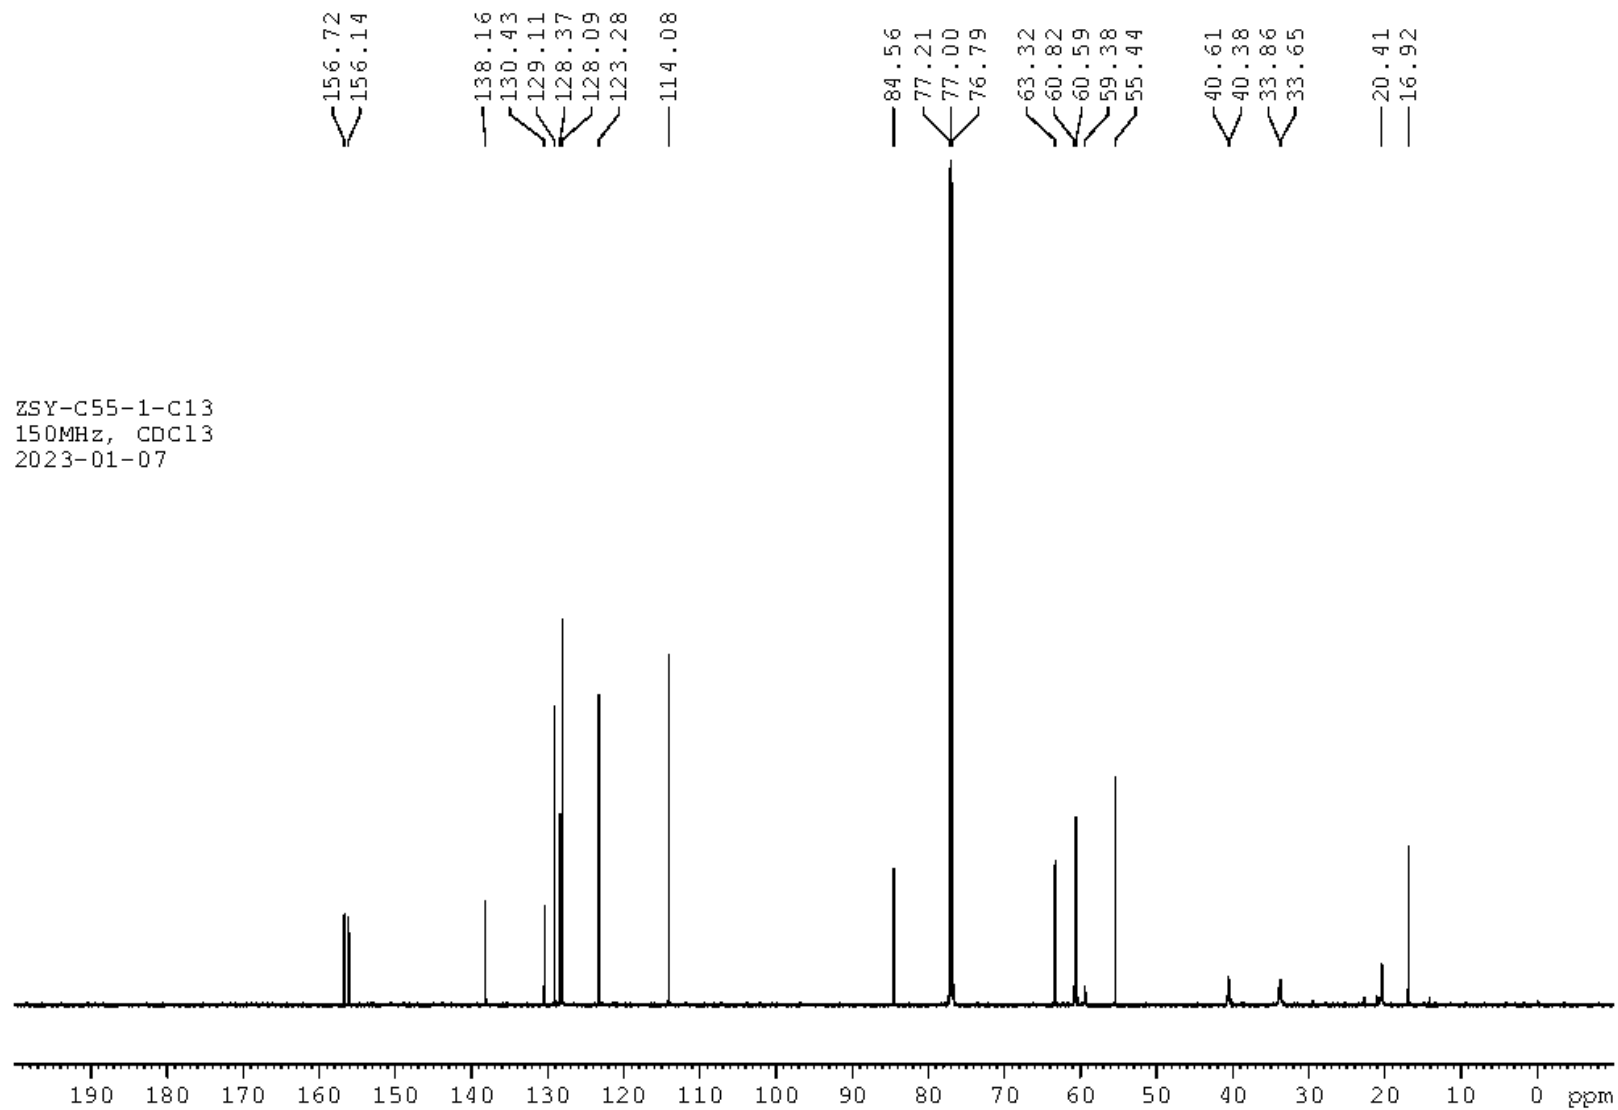

## 6. References

- [1] M. J. Frisch, G. W. Trucks, H. B. Schlegel, G. E. Scuseria, M. A. Robb, J. R. Cheeseman, G. Scalmani, V. Barone, B. Mennucci, G. A. Petersson, H. Nakatsuji, M. Caricato, X. Li, H. P. Hratchian, A. F. Izmaylov, J. Bloino, G. Zheng, J. L. Sonnenberg, M. Hada, M. Ehara, K. Toyota, R. Fukuda, J. Hasegawa, M. Ishida, T. Nakajima, Y. Honda, O. Kitao, H. Nakai, T. Vreven, J. A. Jr. Montgomery, J. E. Peralta, F. Ogliaro, M. Bearpark, J. J. Heyd, E. Brothers, K. N. Kudin, V. N. Staroverov, R. Kobayashi, J. Normand, K. Raghavachari, A. Rendell, J. C. Burant, S. S. Iyengar, J. Tomasi, M. Cossi, N. Rega, J. M. Millam, M. Klene, J. E. Knox, J. B. Cross, V. Bakken, C. Adamo, J. Jaramillo, R. Gomperts, R. E. Stratmann, O. Yazyev, A. J. Austin, R. Cammi, C. Pomelli, J. W. Ochterski, R. L. Martin, K. Morokuma, V. G. Zakrzewski, G. A. Voth, P. Salvador, J. J. Dannenberg, S. Dapprich, A. D. Daniels, J. B. Foresman, J. V. Ortiz, J. Cioslowski, D. J. Fox, *Gaussian 09*; Gaussian, Inc.: Wallingford, CT, 2009.
- [2] C. Lee, W. Yang, R. G. Parr, *Phys. Rev. B* **1988**, *37*, 785–789.
- [3] A. D. Becke, *J. Phys. Chem.* **1993**, *98*, 1372–1377, doi:10.1063/1.464304.
- [4] P. J. Stephens, F. J. Devlin, C. F. Chabalowski, M. J. Frisch, *J. Phys. Chem.* **1994**, *98*, 11623–11627.
- [5] F. Weigend, R. Ahlrichs, *Phys. Chem. Chem. Phys.* **2005**, *7*, 3297–3305.
- [6] A. V. Marenich, C. J. Cramer, D. G. Truhlar, *J. Phys. Chem. B* **2009**, *113*, 6378–6396.
- [7] Y. Zhao, D. G. Truhlar, *Theor. Chem. Acc.* **2008**, *120*, 215–241.
- [8] S. Grimme, J. Antony, S. Ehrlich, H. A. Krieg, *J. Chem. Phys.* **2010**, *132*, 54104–154123.
- [9] T. Lu, *The sobMECP Program*, <http://sobereva.com/286>. (Date of access: 22/03/2023).
- [10] C. Y. Legault, *CYLview, 1.0b*; Université de Sherbrooke, 2009; <http://www.cylview.org>.
